# Supplementary material for: Location-specific signatures of Crohn’s disease at a multi-omics scale
Source: Microbiome. 2022 Aug 24;10:133. doi: 10.1186/s40168-022-01331-x (PMC9400277; doi:10.1186/s40168-022-01331-x)
Supplement: Supplementary file 6 — Additional file 5. [file 40168_2022_1331_MOESM5_ESM.csv]

Group-wise comparisons
PERMANOVA, permutation n = 999
Healthy vs. IBD (values reported with respect to comparisons against healthy controls)
Feature set	Sample size	q-value	Test statistic	Combined Score (log2(Test-stat/qvalue))
Metagenomics	170	0.002	2.42	10.24079133
Metabolomics	163	0.001	3.73	11.86495992
16s ASV	180	0.001	2.96	11.53138146
Metaproteomics	182	0.001	4.12	12.00842862
Healthy vs. CD (values reported with respect to comparisons against healthy controls)
Feature set	Sample size	q-value	Test Statistic	Combined Score (log2(Test-stat/qvalue))
Metagenomics	115	0.006	3.04	8.984893108
Metabolomics	107	0.001	3.86	11.91438513
16s ASV	121	0.001	3.55	11.79360331
Metaproteomics	122	0.001	4.39	12.10000522
Healthy vs. UC (values reported with respect to comparisons against Healthy Controls)
Feature set	Sample size	q-value	Test Statistic	Combined Score (log2(Test-stat/qvalue))
Metagenomics	73	0.01	1.81	7.499845887
Metabolomics	75	0.001	3.95	11.94763694
16s ASV	78	0.001	2.23	11.12282799
Metaproteomics	79	0.001	3.48	11.76487159
UC vs. CD (values reported with respect to comparisons against UC)
Feature set	Sample size	q-value	Test statistic	Combined Score (log2(Test-stat/qvalue))
Metagenomics	152	0.003	3.36	10.12928302
Metabolomics	144	0.001	3.57	11.80170836
16s ASV	161	0.001	2.86	11.48179943
Metaproteomics	163	0.03	1.61	5.745954377
CCD vs. ICD (values reported with respect to comparisons against CCD)
Feature set	Sample size	q-value	Test statistic	Combined Score (log2(Test-stat/qvalue))
Metagenomics	51	0.07	1.73	4.627273306
Metabolomics	45	0.002	2.89	10.49685378
16s ASV	54	0.12	1.47	3.614709844
Metaproteomics	55	0.002	2.41	10.23481743
CCD vs. ICCD (values reported with respect to comparisons against CCD)
Feature set	Sample size	q-value	Test statistic	Combined Score (log2(Test-stat/qvalue))
Metagenomics	32	0.17	1.39	3.031478231
Metabolomics	29	0.11	1.39	3.659509454
16s ASV	35	0.24	1.21	2.333900737
Metaproteomics	35	0.02	1.96	6.614709844
ICD vs. ICCD (values reported with respect to comparisons against ICD)
Feature set	Sample size	q-value	Test statistic	Combined Score (log2(Test-stat/qvalue))
Metagenomics	39	0.93	0.56	-0.731803889
Metabolomics	36	0.08	1.47	4.199672345
16s ASV	41	0.61	0.84	0.461580085
Metaproteomics	42	0.03	1.85	5.94641896
Average Metrics
Feature set	q-value	Test statistic	Combined Score (log2(Test-stat/qvalue))
Metagenomics	0.148875	1.78875	3.586778354	avg
Metabolomics	0.0245	2.6075	6.733741693	avg
16s ASV	0.12175	1.89	3.956392557	avg
Metaproteomics	0.010625	2.4775	7.865278406	avg
