# Supplementary material for: Location-specific signatures of Crohn’s disease at a multi-omics scale
Source: Microbiome. 2022 Aug 24;10:133. doi: 10.1186/s40168-022-01331-x (PMC9400277; doi:10.1186/s40168-022-01331-x)
Supplement: Supplementary file 7 — Additional file 6. [file 40168_2022_1331_MOESM6_ESM.csv]

Accuracy
Dataset	IBD vs HC	CD vs UC	CVIC	IVC	IVIC	NVIC	NVI	NVC	Severity	Ulcer	CD Col vs UC	CD Il vs UC	Average
Proteome	0.82	0.6	0.8	0.88	1	0.93	0.7	0.72	0.9	0.83	0.68	0.77	0.8025
Metabolome	0.93	0.65	0.8	0.45	0.92	0.82	0.67	0.86	0.95	0.75	0.66	0.83	0.774166667
Metagenome	0.75	0.64	0.8	0.69	0.58	0.77	0.53	0.82	0.76	0.58	0.65	0.85	0.701666667
ASV	0.64	0.71	0.8	0.63	0.5	0.71	0.55	0.5	0.5	0.63	0.7	0.5	0.614166667
Combined	0.76	0.72	0.83	0.91	1	0.83	0.41	0.79	0.83	0.73	0.75	0.82	0.781666667
Precision
Dataset	IBD vs HC	CD vs UC	CVIC	IVC	IVIC	NVIC	NVI	NVC	Severity	Ulcer	CD Col vs UC	CD Il vs UC	Average
Proteome	0.98	0.72	0.6	1	1	0.75	0.67	0.66	0.77	0.77	0.43	0.71	0.755
Metabolome	1	0.71	0.6	0.33	0.67	0.33	0.6	0.57	0.75	0.5	1	0.67	0.644166667
Metagenome	0.97	0.75	0.6	0.58	0.25	0.5	0.5	0.83	0.56	0.43	0.3	0.86	0.594166667
ASV	0.93	0.79	0.67	0.57	0.2	0.33	0.5	0.39	0.26	0.46	0.57	0.33	0.5
Combined	0.92	0.73	0.67	1	1	0.5	0.36	0.57	0.57	0.56	0.33	1	0.684166667
Recall
Dataset	IBD vs HC	CD vs UC	CVIC	IVC	IVIC	NVIC	NVI	NVC	Severity	Ulcer	CD Col vs UC	CD Il vs UC	Average
Proteome	0.81	0.6	1	0.71	1	1	0.67	0.57	0.88	0.7	0.43	0.55	0.743333333
Metabolome	0.85	0.71	1	0.5	1	1	0.43	1	1	0.86	0.25	0.85	0.7875
Metagenome	0.68	0.72	1	1	0.33	0.67	0.3	0.71	0.62	0.7	0.75	0.66	0.678181818
ASV	0.77	0.73	0.67	0.57	0.33	0.33	0.44	0.71	0.63	0.7	0.57	0.33	0.565
Combined	0.93	0.83	1	0.75	1	1	0.57	1	0.8	0.71	0.25	0.43	0.7725
