# Supplementary material for: Location-specific signatures of Crohn’s disease at a multi-omics scale
Source: Microbiome. 2022 Aug 24;10:133. doi: 10.1186/s40168-022-01331-x (PMC9400277; doi:10.1186/s40168-022-01331-x)
Supplement: Supplementary file 10 — Additional file 9. [file 40168_2022_1331_MOESM9_ESM.csv]

protein	Taxa	mean_ileal	mean_colonic	pvalue	log2_ratio	p_adjusted	Protein.names	Qemistree_ID
G001560465	k__Archaea;p__Crenarchaeota;c__Thermoprotei;o__Sulfolobales;f__Sulfolobaceae;g__Sulfolobus;s__Sulfolobus acidocaldarius	9.066666667	438.5416667	0.040192535	-5.595997866	0.786117268		#N/A
G001618265	k__Bacteria;p__Chlamydiae;c__Chlamydiia;o__Parachlamydiales;f__Waddliaceae;g__Waddlia;s__Waddlia chondrophila	7.966666667	349.4583333	0.037438984	-5.455000428	0.786117268		#N/A
P02675	Human	13.40180347	306.4423704	0.01122714	-4.515116724	0.261910925	Fibrinogen beta chain [Cleaved into: Fibrinopeptide B; Fibrinogen beta chain]	#N/A
P02679	Human	14.46706125	283.7270776	0.005308629	-4.293660045	0.261910925	Fibrinogen gamma chain	#N/A
P02768	Human	15.08824818	244.8442248	0.009160608	-4.02036695	0.261910925	Serum albumin	#N/A
P02787	Human	15.95685208	253.7911864	0.022664527	-3.991393995	0.277220739	Serotransferrin (Transferrin) (Beta-1 metal-binding globulin) (Siderophilin)	#N/A
P13796	Human	16.14939135	256.7150553	0.041714467	-3.990616208	0.333109424	Plastin-2 (L-plastin) (LC64P) (Lymphocyte cytosolic protein 1) (LCP-1)	#N/A
P17213	Human	21.67466378	288.37825	0.008861757	-3.733880838	0.261910925	Bactericidal permeability-increasing protein (BPI) (CAP 57)	#N/A
P62937	Human	25.0056787	315.1992608	0.033571579	-3.655936484	0.307972611	Peptidyl-prolyl cis-trans isomerase A (PPIase A) (EC 5.2.1.8) (Cyclophilin A) (Cyclosporin A-binding protein) (Rotamase A) [Cleaved into: Peptidyl-prolyl cis-trans isomerase A, N-terminally processed]	#N/A
P12429	Human	20.85338278	247.3500651	0.005517261	-3.568200941	0.261910925	Annexin A3 (35-alpha calcimedin) (Annexin III) (Annexin-3) (Inositol 1,2-cyclic phosphate 2-phosphohydrolase) (Lipocortin III) (Placental anticoagulant protein III) (PAP-III)	#N/A
P02790	Human	24.44981993	289.7742086	0.012312419	-3.567033448	0.261910925	Hemopexin (Beta-1B-glycoprotein)	#N/A
D3DSM0	Human	24.12196864	277.1497962	0.009267325	-3.522246389	0.261910925	Integrin beta	#N/A
P04083	Human	21.6305619	237.7766095	0.006652469	-3.458463753	0.261910925	Annexin A1 (Annexin I) (Annexin-1) (Calpactin II) (Calpactin-2) (Chromobindin-9) (Lipocortin I) (Phospholipase A2 inhibitory protein) (p35)	#N/A
P28676	Human	29.86276661	244.6092426	0.04746577	-3.034059183	0.334214427	Grancalcin	#N/A
P04114	Human	28.74583768	231.4572032	0.001299781	-3.009320483	0.261910925	Apolipoprotein B-100 (Apo B-100) [Cleaved into: Apolipoprotein B-48 (Apo B-48)]	#N/A
P08133	Human	27.1814308	217.1154095	0.016762831	-2.997768818	0.261910925	Annexin A6 (67 kDa calelectrin) (Annexin VI) (Annexin-6) (Calphobindin-II) (CPB-II) (Chromobindin-20) (Lipocortin VI) (Protein III) (p68) (p70)	#N/A
P01857	Human	47.33953311	339.3926717	0.010444692	-2.841838032	0.261910925	Immunoglobulin heavy constant gamma 1 (Ig gamma-1 chain C region) (Ig gamma-1 chain C region EU) (Ig gamma-1 chain C region KOL) (Ig gamma-1 chain C region NIE)	#N/A
A0A0G2JPR0	Human	42.53560269	297.2929165	0.003712828	-2.805142288	0.261910925	Complement C4-A	#N/A
P11215	Human	38.794787	265.4785349	0.023414395	-2.774660507	0.279968957	Integrin alpha-M (CD11 antigen-like family member B) (CR-3 alpha chain) (Cell surface glycoprotein MAC-1 subunit alpha) (Leukocyte adhesion receptor MO1) (Neutrophil adherence receptor) (CD antigen CD11b)	#N/A
G000832085	k__Bacteria;p__Bacteroidetes;c__Bacteroidia;o__Bacteroidales;f__Porphyromonadaceae;g__Sanguibacteroides;s__Sanguibacteroides justesenii	7.966666667	47.625	0.030014223	-2.579670975	0.786117268	-2.579670975	#N/A
P02788	Human	51.32400093	300.2096305	0.003383279	-2.548264714	0.261910925	Lactotransferrin (Lactoferrin) (EC 3.4.21.-) (Growth-inhibiting protein 12) (Talalactoferrin) [Cleaved into: Lactoferricin-H (Lfcin-H); Kaliocin-1; Lactoferroxin-A; Lactoferroxin-B; Lactoferroxin-C]	#N/A
P04217	Human	58.43687943	331.0268191	0.0015627	-2.501997061	0.261910925	Alpha-1B-glycoprotein (Alpha-1-B glycoprotein)	#N/A
O60814	Human	26.52135358	143.1213461	0.016038758	-2.432012548	0.261910925	Histone H2B type 1-K (H2B K) (HIRA-interacting protein 1)	#N/A
P80511	Human	74.56882243	373.1590885	0.045589597	-2.32314636	0.333361995	Protein S100-A12 (CGRP) (Calcium-binding protein in amniotic fluid 1) (CAAF1) (Calgranulin-C) (CAGC) (Extracellular newly identified RAGE-binding protein) (EN-RAGE) (Migration inhibitory factor-related protein 6) (MRP-6) (p6) (Neutrophil S100 protein) (S100 calcium-binding protein A12) [Cleaved into: Calcitermin]	#N/A
P27105	Human	42.41599764	210.1097422	0.010471763	-2.308462657	0.261910925	Erythrocyte band 7 integral membrane protein (Protein 7.2b) (Stomatin)	#N/A
E9PFZ2	Human	68.57467003	335.7427059	0.03782931	-2.291608377	0.317746142	Ceruloplasmin	#N/A
P08311	Human	54.00596362	258.5911539	0.015474577	-2.259482292	0.261910925	Cathepsin G (CG) (EC 3.4.21.20)	#N/A
k99_8920948_1	k__Bacteria; p__Firmicutes; c__Clostridia; o__Clostridiales; f__Ruminococcaceae; g__Faecalibacterium; s__uncultured Faecalibacterium sp.	42.66691528	202.3553164	0.022293821	-2.245701037	0.276092894	Glycogen synthase (EC 2.4.1.21) (Starch [bacterial glycogen] synthase)	#N/A
O75594	Human	54.43136367	255.7381712	0.00901099	-2.232157427	0.261910925	Peptidoglycan recognition protein 1 (Peptidoglycan recognition protein short) (PGRP-S)	#N/A
P00450	Human	73.0336331	335.6177642	0.019058768	-2.200186174	0.268119689	Ceruloplasmin (EC 1.16.3.1) (Ferroxidase)	#N/A
P02751	Human	48.06244859	218.2622646	0.001322231	-2.183080669	0.261910925	Fibronectin (FN) (Cold-insoluble globulin) (CIG) [Cleaved into: Anastellin; Ugl-Y1; Ugl-Y2; Ugl-Y3]	#N/A
k99_1432679_1	k__Bacteria; p__Firmicutes; c__Clostridia; o__Clostridiales; f__Eubacteriaceae; g__Eubacterium; s__Eubacterium sp. 41_20	34.47017034	148.1784979	0.012544329	-2.103915781	0.261910925	Extracellular solute binding ABC transporter	#N/A
Q9Y6N5	Human	56.38485807	231.7151144	0.010012699	-2.038972462	0.261910925	Sulfide:quinone oxidoreductase, mitochondrial (SQOR) (EC 1.8.5.-) (Sulfide dehydrogenase-like) (Sulfide quinone oxidoreductase)	#N/A
O75131	Human	74.69375505	306.6437043	0.045640129	-2.037503798	0.333361995	Copine-3 (Copine III)	#N/A
P31997	Human	88.99009757	364.4516509	0.015006347	-2.034010722	0.261910925	Carcinoembryonic antigen-related cell adhesion molecule 8 (CD67 antigen) (Carcinoembryonic antigen CGM6) (Non-specific cross-reacting antigen NCA-95) (CD antigen CD66b)	#N/A
X6R8F3	Human	89.57803019	322.7500755	0.031668854	-1.849200586	0.302054558	Neutrophil gelatinase-associated lipocalin	#N/A
A6NC48	Human	81.57031917	291.9682528	0.016633056	-1.839695304	0.261910925	ADP-ribosyl cyclase/cyclic ADP-ribose hydrolase 2	#N/A
P01023	Human	74.66410062	265.9245255	0.005781313	-1.832530189	0.261910925	Alpha-2-macroglobulin (Alpha-2-M) (C3 and PZP-like alpha-2-macroglobulin domain-containing protein 5)	#N/A
P01024	Human	77.8672044	270.9496554	0.008245557	-1.798937076	0.261910925	Complement C3 (C3 and PZP-like alpha-2-macroglobulin domain-containing protein 1) [Cleaved into: Complement C3 beta chain; C3-beta-c (C3bc); Complement C3 alpha chain; C3a anaphylatoxin; Acylation stimulating protein (ASP) (C3adesArg); Complement C3b alpha' chain; Complement C3c alpha' chain fragment 1; Complement C3dg fragment; Complement C3g fragment; Complement C3d fragment; Complement C3f fra…	#N/A
k99_3699875_1	k__Bacteria; p__Firmicutes; c__Clostridia; o__Clostridiales; f__Ruminococcaceae; g__Faecalibacterium; s__Faecalibacterium prausnitzii	40.07041903	138.595991	0.014814119	-1.790276026	0.261910925	Carbohydrate ABC transporter substrate-binding protein, CUT1 family (TC 3.A.1.1.-)	#N/A
P02763	Human	101.0228238	348.7782552	0.005177867	-1.787628823	0.261910925	Alpha-1-acid glycoprotein 1 (AGP 1) (Orosomucoid-1) (OMD 1)	#N/A
P50995	Human	70.37435903	238.5614321	0.004340106	-1.761239041	0.261910925	Annexin A11 (56 kDa autoantigen) (Annexin XI) (Annexin-11) (Calcyclin-associated annexin 50) (CAP-50)	#N/A
MTB_feature_88	Hydroxycinnamic acids	225855.3613	716492.7968	0.001348636	-1.66555304	0.105867909		missing
MTB_feature_17	Leucine and derivatives	1202628.24	3780794.154	0.002447663	-1.652498563	0.10945633		missing
P20073	Human	85.8938375	265.8921708	0.020768925	-1.630214764	0.276069074	Annexin A7 (Annexin VII) (Annexin-7) (Synexin)	#N/A
MTB_feature_261	unclassified	36046.0914	110796.7096	0.04156023	-1.6200003	0.271873173		missing
P02794	Human	100.2926057	307.2774659	0.030494447	-1.615326727	0.300839772	Ferritin heavy chain (Ferritin H subunit) (EC 1.16.3.1) (Cell proliferation-inducing gene 15 protein) [Cleaved into: Ferritin heavy chain, N-terminally processed]	#N/A
MTB_feature_151	Phenylacetamides	132296.8494	404386.5555	0.003693169	-1.611956328	0.10945633		missing
Q9HD89	Human	80.68558433	238.7186548	0.014048202	-1.564928468	0.261910925	Resistin (Adipose tissue-specific secretory factor) (ADSF) (C/EBP-epsilon-regulated myeloid-specific secreted cysteine-rich protein) (Cysteine-rich secreted protein A12-alpha-like 2) (Cysteine-rich secreted protein FIZZ3)	#N/A
k99_821445_1	k__Bacteria; p__Firmicutes; c__Clostridia; o__Clostridiales; f__Ruminococcaceae; g__Faecalibacterium; s__Faecalibacterium prausnitzii	47.92294813	137.0706582	0.011511052	-1.516131208	0.261910925	Ribosomal protein S1	#N/A
k99_2051191_2	k__Bacteria; p__Firmicutes; c__Clostridia; o__Clostridiales; f__Ruminococcaceae; g__Faecalibacterium; s__Faecalibacterium prausnitzii	44.82949183	126.897226	0.024372771	-1.501140481	0.279968957	Tat pathway signal sequence domain protein	#N/A
k99_2968674_1	k__Bacteria; p__Firmicutes; c__Clostridia; o__Clostridiales; f__Lachnospiraceae; g__Roseburia; s__Roseburia sp. CAG:197_41_10	53.45592276	149.581534	0.035000657	-1.484510375	0.312879584	30S ribosomal protein S7	#N/A
k99_1813434_1	k__Bacteria; p__Firmicutes; c__Clostridia; o__Clostridiales; f__Ruminococcaceae; g__Faecalibacterium; s__Faecalibacterium prausnitzii	39.47525115	110.3472221	0.010458383	-1.483029961	0.261910925	ABC transporter, solute-binding protein	#N/A
k99_1989256_2	k__Bacteria; p__Firmicutes; c__Clostridia; o__Clostridiales; f__Ruminococcaceae; g__Faecalibacterium; s__Faecalibacterium prausnitzii	76.07402472	210.5847694	0.016205939	-1.468925258	0.261910925	Tat pathway signal sequence domain protein	#N/A
P02792	Human	82.94458261	229.2923617	0.010881953	-1.466968634	0.261910925	Ferritin light chain (Ferritin L subunit)	#N/A
A0A075B6J9	Human	152.3249552	417.0900967	0.028012835	-1.453206741	0.296039639	Immunoglobulin lambda variable 2-18	#N/A
k99_4249458_1	k__Bacteria; p__Firmicutes; c__Clostridia; o__Clostridiales; f__Ruminococcaceae; g__Faecalibacterium; s__Faecalibacterium prausnitzii	41.39809001	111.777036	0.000144342	-1.432987712	0.253886658	5'-nucleotidase/2',3'-cyclic phosphodiesterase and related esterases	#N/A
P05164	Human	105.7722003	283.09632	0.018272244	-1.420332496	0.268119689	Myeloperoxidase (MPO) (EC 1.11.2.2) [Cleaved into: Myeloperoxidase; 89 kDa myeloperoxidase; 84 kDa myeloperoxidase; Myeloperoxidase light chain; Myeloperoxidase heavy chain]	#N/A
MTB_feature_1190	Secondary carboxylic acid amides	33594.38206	89355.53429	0.010688415	-1.411337093	0.137841168		missing
k99_7906140_1	k__Bacteria; p__Firmicutes; c__Clostridia; o__Clostridiales; f__Ruminococcaceae; g__Faecalibacterium; s__uncultured Faecalibacterium sp.	35.78938128	95.13566906	0.015487292	-1.410454747	0.261910925	Glyceraldehyde-3-phosphate dehydrogenase (EC 1.2.1.-)	#N/A
P05109	Human	87.29372457	230.6055315	0.00966288	-1.40147727	0.261910925	Protein S100-A8 (Calgranulin-A) (Calprotectin L1L subunit) (Cystic fibrosis antigen) (CFAG) (Leukocyte L1 complex light chain) (Migration inhibitory factor-related protein 8) (MRP-8) (p8) (S100 calcium-binding protein A8) (Urinary stone protein band A)	#N/A
k99_7309227_2	k__Bacteria; p__Firmicutes; c__Clostridia; o__Clostridiales; f__Ruminococcaceae; g__Subdoligranulum; s__Subdoligranulum sp. 60_17	49.13334616	128.625642	0.021756796	-1.388403878	0.276092894	Acetyl-CoA acetyltransferase (EC 2.3.1.9)	#N/A
P05155	Human	103.3474487	269.7874501	0.010388229	-1.384320464	0.261910925	Plasma protease C1 inhibitor (C1 Inh) (C1Inh) (C1 esterase inhibitor) (C1-inhibiting factor) (Serpin G1)	#N/A
k99_7301982_1	k__Bacteria; p__Firmicutes; c__Clostridia; o__Clostridiales; f__Ruminococcaceae; g__Faecalibacterium; s__uncultured Faecalibacterium sp.	43.98563992	114.6447313	0.00872358	-1.382065549	0.261910925	3-hydroxybutyryl-CoA dehydrogenase (EC 1.1.1.157)	#N/A
MTB_feature_232	Indolyl carboxylic acids and derivatives	180705.9349	469110.1951	0.039969713	-1.376282966	0.271873173		Spectral Match to L-Tryptophan from NIST14
k99_890477_1	k__Bacteria; p__Firmicutes; c__Clostridia; o__Clostridiales; f__Clostridiaceae; g__Clostridium; s__Clostridium sp. CAG:510	47.76482215	123.2619743	0.033854923	-1.367707407	0.308430025	Pyruvate, phosphate dikinase (EC 2.7.9.1)	#N/A
k99_1423609_1	k__Bacteria; p__Firmicutes; c__Clostridia; o__Clostridiales; f__Lachnospiraceae; g__Blautia; s__Blautia massiliensis	56.51626109	144.7443717	0.024139981	-1.356769321	0.279968957	Multiple sugar-binding periplasmic receptor ChvE	#N/A
k99_6873219_1	k__Bacteria; p__Firmicutes; c__Clostridia; o__Clostridiales; f__Ruminococcaceae; g__Faecalibacterium; s__Faecalibacterium prausnitzii	39.38574888	100.8375753	0.003003093	-1.35628772	0.261910925	3-hydroxybutyryl-CoA dehydrogenase (EC 1.1.1.157)	#N/A
P10153	Human	74.72837938	186.5242949	0.005582824	-1.319635414	0.261910925	Non-secretory ribonuclease (EC 4.6.1.18) (Eosinophil-derived neurotoxin) (RNase UpI-2) (Ribonuclease 2) (RNase 2) (Ribonuclease US)	#N/A
MTB_feature_40	unclassified	709539.4565	1770929.764	0.014863995	-1.319552177	0.144913333		missing
MTB_feature_13	Phenylalanine and derivatives	1768619.561	4407811.516	0.014674859	-1.317438783	0.144913333		missing
P20160	Human	108.6469953	270.7349753	0.035239894	-1.317233	0.312879584	Azurocidin (Cationic antimicrobial protein CAP37) (Heparin-binding protein) (HBP) (hHBP)	#N/A
MTB_feature_229	Indoles	298972.4024	735125.9084	0.03593874	-1.29797905	0.268684865		Spectral Match to DL-Indole-3-lactic acid from NIST14
k99_990233_1	k__Bacteria; p__Firmicutes; c__Clostridia; o__Clostridiales; f__Ruminococcaceae; g__Faecalibacterium; s__Faecalibacterium sp. CAG:82	39.92825695	97.94510204	0.004902981	-1.294563256	0.261910925	Pyruvate synthase (EC 1.2.7.1) (Fragment)	#N/A
k99_4551429_2	k__Bacteria; p__Firmicutes; c__Clostridia; o__Clostridiales; f__Ruminococcaceae; g__Faecalibacterium; s__Faecalibacterium prausnitzii	50.01787106	121.1692409	0.007014856	-1.276507956	0.261910925	DNA-directed RNA polymerase subunit alpha (RNAP subunit alpha) (EC 2.7.7.6) (RNA polymerase subunit alpha) (Transcriptase subunit alpha)	#N/A
k99_6689792_1	k__Bacteria; p__Firmicutes; c__Clostridia; o__Clostridiales; f__Ruminococcaceae; g__Faecalibacterium; s__uncultured Faecalibacterium sp.	42.97398221	104.0463482	0.018225951	-1.275690953	0.268119689	Pyruvate synthase (EC 1.2.7.1) (Fragment)	#N/A
k99_3342156_1	k__Bacteria; p__Firmicutes; c__Clostridia; o__Clostridiales; f__Ruminococcaceae; g__Faecalibacterium; s__Faecalibacterium prausnitzii	52.35337527	126.2249362	0.026875609	-1.269642491	0.292891749	Phosphoglycerate kinase (EC 2.7.2.3) (Fragment)	#N/A
k99_3365194_1	k__Bacteria; p__Firmicutes; c__Clostridia; o__Clostridiales; f__Lachnospiraceae; g__Fusicatenibacter; s__Fusicatenibacter saccharivorans	45.6249377	108.5317672	0.022118082	-1.250222887	0.276092894	ABC transporter, solute-binding protein	#N/A
k99_4110290_1	k__Bacteria; p__Firmicutes; c__Clostridia; o__Clostridiales; f__Eubacteriaceae; g__Eubacterium; s__Eubacterium sp. 3_1_31	74.26778124	176.2052487	0.003271873	-1.246448516	0.261910925	Glucose-6-phosphate isomerase (GPI) (EC 5.3.1.9) (Phosphoglucose isomerase) (PGI) (Phosphohexose isomerase) (PHI)	#N/A
MTB_feature_30	Tyrosine and derivatives	726776.2736	1711997.622	0.004183044	-1.236097471	0.10945633		Massbank:PB000414 Tyrosine|2-amino-3-(4-hydroxyphenyl)propanoic acid
k99_7198384_1	k__Bacteria; p__Firmicutes; c__Clostridia; o__Clostridiales; f__Ruminococcaceae; g__Faecalibacterium; s__uncultured Faecalibacterium sp.	58.22520311	136.1656664	0.006585288	-1.225647308	0.261910925	Glutamate dehydrogenase (EC 1.4.1.4)	#N/A
k99_9738491_1	k__Bacteria; p__Firmicutes; c__Clostridia; o__Clostridiales; f__Ruminococcaceae; g__Subdoligranulum; s__Subdoligranulum sp. 60_17	39.81927793	93.06575956	0.009866198	-1.224783414	0.261910925	Glyceraldehyde-3-phosphate dehydrogenase (GAPDH) (EC 1.2.1.12) (NAD-dependent glyceraldehyde-3-phosphate dehydrogenase) (Plasmin receptor) (Plasminogen-binding protein)	#N/A
k99_391326_1	k__Bacteria; p__Firmicutes; c__Clostridia; o__Clostridiales; f__Ruminococcaceae; g__Faecalibacterium; s__Faecalibacterium prausnitzii	50.1053902	115.5461083	0.005238184	-1.205430952	0.261910925	LL-diaminopimelate aminotransferase	#N/A
MTB_feature_132	Methionine and derivatives	255885.6592	589548.8852	0.005352857	-1.20411215	0.118092343		missing
k99_10322511_1	k__Bacteria; p__Firmicutes; c__Clostridia; o__Clostridiales; f__Ruminococcaceae; g__Faecalibacterium; s__Faecalibacterium prausnitzii	40.63160339	93.0323953	0.030630545	-1.195130875	0.300839772	Ribosomal protein S1	#N/A
P12724	Human	79.93000013	182.5959944	0.008790055	-1.191846121	0.261910925	Eosinophil cationic protein (ECP) (EC 3.1.27.-) (Ribonuclease 3) (RNase 3)	#N/A
Q9BYE9	Human	85.13584349	194.0339995	0.048223241	-1.188470909	0.33439843	Cadherin-related family member 2 (Protocadherin LKC) (PC-LKC) (Protocadherin-24)	#N/A
k99_5388628_1	k__Bacteria; p__Firmicutes; c__Clostridia; o__Clostridiales; f__Ruminococcaceae; g__Faecalibacterium; s__Faecalibacterium prausnitzii	41.15791447	92.89594992	0.015295676	-1.174445819	0.261910925	Deleted.	#N/A
P48595	Human	147.4861333	331.8154859	0.042000441	-1.1698019	0.333109424	Serpin B10 (Bomapin) (Peptidase inhibitor 10) (PI-10)	#N/A
k99_1737916_1	k__Bacteria; p__Firmicutes; c__Clostridia; o__Clostridiales; f__Lachnospiraceae; g__Fusicatenibacter; s__Fusicatenibacter saccharivorans	63.08206144	141.4486107	0.028898653	-1.164976295	0.298735044	ABC transporter, substrate-binding protein, family 5	#N/A
k99_4720685_1	k__Bacteria; p__Firmicutes; c__Clostridia; o__Clostridiales; f__Ruminococcaceae; g__Faecalibacterium; s__Faecalibacterium prausnitzii	51.55776122	114.7653061	0.022478918	-1.154425052	0.276229304	NifU_N domain-containing protein	#N/A
k99_2597081_1	k__Bacteria; p__Firmicutes; c__Clostridia; o__Clostridiales; f__Ruminococcaceae; g__Faecalibacterium; s__Faecalibacterium prausnitzii	51.86835745	115.0019783	0.00460073	-1.14873209	0.261910925	Electron transfer flavoprotein FAD-binding domain protein (Fragment)	#N/A
k99_4677628_1	k__Bacteria; p__Firmicutes; c__Clostridia; o__Clostridiales; f__Ruminococcaceae; g__Faecalibacterium; s__Faecalibacterium prausnitzii	49.8620983	109.3528133	0.007452619	-1.132974836	0.261910925	2-dehydro-3-deoxyphosphogluconate aldolase/4-hydroxy-2-oxoglutarate aldolase (Fragment)	#N/A
k99_9125857_3	k__Bacteria; p__Firmicutes; c__Clostridia; o__Clostridiales; f__Lachnospiraceae; g__Dorea; s__Dorea formicigenerans	56.59803588	123.3006901	0.015675106	-1.123356982	0.261910925	Glycine/sarcosine/betaine reductase complex, protein B, alpha and beta subunits (EC 1.21.4.-) (Sarcosine reductase complex component B subunit alpha) (EC 1.21.4.3)	#N/A
k99_3812932_1	k__Bacteria; p__Firmicutes; c__Clostridia; o__Clostridiales; f__Lachnospiraceae; g__Roseburia; s__Roseburia faecis	51.90646278	111.8953342	0.046617202	-1.108163798	0.33358116	Glutamate dehydrogenase	#N/A
k99_1702408_1	k__Bacteria; p__Firmicutes; c__Clostridia; o__Clostridiales; f__Oscillospiraceae; g__Oscillibacter; s__Oscillibacter sp. CAG:241	56.12937034	120.4907707	0.008813071	-1.102094864	0.261910925	Acryloyl-CoA reductase electron transfer subunit gamma (Electron transfer flavoprotein small subunit) (ETFSS) (Electron transfer flavoprotein subunit gamma) (Gamma-ETF)	#N/A
k99_2363601_1	k__Bacteria; p__Firmicutes; c__Clostridia; o__Clostridiales; f__Ruminococcaceae; g__Ruminococcus; s__Ruminococcus sp. CAG:17	49.13939708	104.9847828	0.049989038	-1.095228168	0.33686891	Heat shock protein Hsp20	#N/A
k99_1262144_1	k__Bacteria; p__Firmicutes; c__Clostridia; o__Clostridiales; f__; g__; s__Clostridiales bacterium 59_14	54.62746791	116.256167	0.038799788	-1.089608791	0.323372366	Pyruvate, phosphate dikinase (EC 2.7.9.1)	#N/A
k99_9125857_4	k__Bacteria; p__Firmicutes; c__Clostridia; o__Clostridiales; f__Lachnospiraceae; g__Dorea; s__Dorea sp. AGR2135	55.901959	118.0031364	0.008475077	-1.07785446	0.261910925	Glycine reductase, B (EC 1.21.4.2)	#N/A
P06702	Human	117.2266824	246.5651556	0.043167782	-1.07266795	0.333109424	Protein S100-A9 (Calgranulin-B) (Calprotectin L1H subunit) (Leukocyte L1 complex heavy chain) (Migration inhibitory factor-related protein 14) (MRP-14) (p14) (S100 calcium-binding protein A9)	#N/A
k99_9663677_1	k__Bacteria; p__Firmicutes; c__Clostridia; o__Clostridiales; f__Ruminococcaceae; g__Faecalibacterium; s__Faecalibacterium prausnitzii	48.83765511	102.6696549	0.01033871	-1.071944003	0.261910925	Acryloyl-CoA reductase electron transfer subunit beta (Electron transfer flavoprotein large subunit) (ETFLS) (Electron transfer flavoprotein subunit beta) (Beta-ETF)	#N/A
Q9Y277	Human	110.7142257	232.440842	0.043903257	-1.07002298	0.333109424	Voltage-dependent anion-selective channel protein 3 (VDAC-3) (hVDAC3) (Outer mitochondrial membrane protein porin 3)	#N/A
k99_6843386_1	k__Bacteria; p__Firmicutes; c__Clostridia; o__Clostridiales; f__Lachnospiraceae; g__Blautia; s__[Ruminococcus] torques	91.63041887	190.7989959	0.04585407	-1.05815506	0.33346126	Putative virion core protein (Lumpy skin disease virus)	#N/A
k99_6625547_3	k__Bacteria; p__Firmicutes; c__Clostridia; o__Clostridiales; f__Lachnospiraceae; g__Dorea; s__Dorea sp. AGR2135	68.74576474	143.1440089	0.035373422	-1.058124549	0.312879584	Glycine reductase complex component B subunits alpha and beta (EC 1.21.4.2) (Selenoprotein PB alpha/beta) [Cleaved into: Betaine reductase component B subunit beta; Betaine reductase component B subunit alpha]	#N/A
P06748	Human	114.0549839	236.7863377	0.030016511	-1.053856352	0.300468275	Nucleophosmin (NPM) (Nucleolar phosphoprotein B23) (Nucleolar protein NO38) (Numatrin)	#N/A
k99_10461516_1	k__Bacteria; p__Firmicutes; c__Clostridia; o__Clostridiales; f__Ruminococcaceae; g__Faecalibacterium; s__uncultured Faecalibacterium sp.	39.7852709	82.41352681	0.025915977	-1.050646729	0.286485402	Pyruvate-flavodoxin oxidoreductase (Fragment)	#N/A
k99_4138052_1	k__Bacteria; p__Firmicutes; c__Clostridia; o__Clostridiales; f__Ruminococcaceae; g__Faecalibacterium; s__Faecalibacterium prausnitzii	47.8672647	99.08620396	0.031251386	-1.049644833	0.302054558	Pyruvate, phosphate dikinase (EC 2.7.9.1) (Pyruvate, orthophosphate dikinase)	#N/A
k99_2845445_1	k__Bacteria; p__Firmicutes; c__Clostridia; o__Clostridiales; f__Ruminococcaceae; g__Faecalibacterium; s__Faecalibacterium prausnitzii	56.16966328	116.114689	0.044706487	-1.047687431	0.333109424	Oxidoreductase, short chain dehydrogenase/reductase family protein	#N/A
k99_1612500_1	k__Bacteria; p__Firmicutes; c__Clostridia; o__Clostridiales; f__Ruminococcaceae; g__Faecalibacterium; s__Faecalibacterium prausnitzii	49.20525823	101.6087466	0.037506218	-1.046140197	0.317746142	ABC-type sugar transport system, periplasmic component	#N/A
k99_8745130_1	k__Bacteria; p__Firmicutes; c__Clostridia; o__Clostridiales; f__Ruminococcaceae; g__Faecalibacterium; s__Faecalibacterium prausnitzii	49.70044521	102.614776	0.010004721	-1.045907806	0.261910925	50S ribosomal protein L5	#N/A
k99_7098722_1	k__Bacteria; p__Firmicutes; c__Clostridia; o__Clostridiales; f__Ruminococcaceae; g__Faecalibacterium; s__Faecalibacterium prausnitzii	53.79144846	111.0513803	0.042765254	-1.045778582	0.333109424	Elongation factor G (EF-G)	#N/A
k99_2023556_2	k__Bacteria; p__Firmicutes; c__Clostridia; o__Clostridiales; f__Lachnospiraceae; g__Lachnospira; s__uncultured Lachnospira sp.	56.60666515	116.8063589	0.030188082	-1.045074978	0.300468275	Deleted.	#N/A
k99_2028380_1	k__Bacteria; p__Firmicutes; c__Clostridia; o__Clostridiales; f__Ruminococcaceae; g__Faecalibacterium; s__Faecalibacterium prausnitzii	48.48612068	99.85822024	0.038337427	-1.042309364	0.320530003	Pyruvate:ferredoxin (Flavodoxin) oxidoreductase (Fragment)	#N/A
k99_6745421_2	k__Bacteria; p__Firmicutes; c__Clostridia; o__Clostridiales; f__Ruminococcaceae; g__Faecalibacterium; s__Faecalibacterium prausnitzii	50.76095265	104.0508455	0.015535691	-1.035497638	0.261910925	Elongation factor G (EF-G)	#N/A
k99_7369250_1	k__Bacteria; p__Firmicutes; c__Clostridia; o__Clostridiales; f__Ruminococcaceae; g__Faecalibacterium; s__Faecalibacterium prausnitzii	56.0097149	114.0395994	0.027385582	-1.025785887	0.295240598		#N/A
k99_3037040_4	k__Bacteria; p__Firmicutes; c__Clostridia; o__Clostridiales; f__Ruminococcaceae; g__Subdoligranulum; s__Subdoligranulum sp. 60_17	51.39289285	102.7534391	0.040971755	-0.999545914	0.333109424	Oligosaccharides import ATP-binding protein MsmX (EC 7.5.2.-) (Maltodextrin import ATP-binding protein MsmX) (Melibiose/raffinose/stachyose import ATP-binding protein MsmX)	#N/A
k99_6517739_1	k__Bacteria; p__Firmicutes; c__Clostridia; o__Clostridiales; f__Ruminococcaceae; g__Faecalibacterium; s__uncultured Faecalibacterium sp.	43.76640045	87.45591964	0.009152475	-0.998732304	0.261910925	Elongation factor Tu (EF-Tu) (P-40)	#N/A
k99_1123395_4	k__Bacteria; p__Firmicutes; c__Clostridia; o__Clostridiales; f__Ruminococcaceae; g__Subdoligranulum; s__Subdoligranulum sp. 60_17	57.61455298	115.1040051	0.023587349	-0.998432858	0.279968957	50S ribosomal protein L14	#N/A
k99_6044965_1	k__Bacteria; p__Firmicutes; c__Clostridia; o__Clostridiales; f__Lachnospiraceae; g__Blautia; s__Blautia obeum	65.3042988	130.1988221	0.033827318	-0.995466528	0.308430025	Ketol-acid reductoisomerase (NADP(+)) (KARI) (EC 1.1.1.86) (Acetohydroxy-acid isomeroreductase) (AHIR) (Alpha-keto-beta-hydroxylacyl reductoisomerase)	#N/A
k99_4992473_1	k__Bacteria; p__Firmicutes; c__Clostridia; o__Clostridiales; f__Ruminococcaceae; g__Faecalibacterium; s__Faecalibacterium prausnitzii	49.03807606	97.68765613	0.043455625	-0.994273896	0.333109424	Pyruvate, phosphate dikinase (EC 2.7.9.-) (Fragment)	#N/A
k99_3990910_1	k__Bacteria; p__Firmicutes; c__Clostridia; o__Clostridiales; f__Ruminococcaceae; g__Subdoligranulum; s__Subdoligranulum sp. 60_17	57.46485432	114.4512302	0.01357714	-0.993981197	0.261910925	Pyruvate, phosphate dikinase (EC 2.7.9.1)	#N/A
k99_8978237_5	k__Bacteria; p__Firmicutes; c__Clostridia; o__Clostridiales; f__Eubacteriaceae; g__Eubacterium; s__Eubacterium sp. CAG:251	45.85216137	91.23436802	0.024193767	-0.99258765	0.279968957	Pyruvate, phosphate dikinase (EC 2.7.9.1) (Pyruvate, orthophosphate dikinase)	#N/A
k99_4489251_1	k__Bacteria; p__Firmicutes; c__Clostridia; o__Clostridiales; f__Ruminococcaceae; g__Faecalibacterium; s__Faecalibacterium prausnitzii	42.95212225	85.26541164	0.036719884	-0.989231207	0.317038995	Pyruvate-flavodoxin oxidoreductase (Fragment)	#N/A
k99_4866347_1	k__Bacteria; p__Firmicutes; c__Clostridia; o__Clostridiales; f__Ruminococcaceae; g__Faecalibacterium; s__Faecalibacterium sp. CAG:82	59.06863597	117.0766284	0.007416026	-0.986988902	0.261910925	Acryloyl-CoA reductase electron transfer subunit beta (Electron transfer flavoprotein large subunit) (ETFLS) (Electron transfer flavoprotein subunit beta) (Beta-ETF)	#N/A
k99_1544107_4	k__Bacteria; p__Firmicutes; c__Clostridia; o__Clostridiales; f__Ruminococcaceae; g__Subdoligranulum; s__Subdoligranulum variabile	69.91409546	138.4279719	0.034067185	-0.985480241	0.309297264	Chaperone protein DnaK (HSP70) (Heat shock 70 kDa protein) (Heat shock protein 70)	#N/A
k99_1813057_1	k__Bacteria; p__Firmicutes; c__Clostridia; o__Clostridiales; f__Ruminococcaceae; g__Faecalibacterium; s__Faecalibacterium prausnitzii	58.35970407	115.5382895	0.018820599	-0.985326568	0.268119689	Acetyl-CoA acetyltransferase (EC 2.3.1.9)	#N/A
k99_1207725_1	k__Bacteria; p__Firmicutes; c__Clostridia; o__Clostridiales; f__; g__; s__Clostridiales bacterium 59_14	68.72117611	136.0136916	0.041675158	-0.984925252	0.333109424	Branched-chain-amino-acid aminotransferase (EC 2.6.1.42)	#N/A
k99_1409444_1	k__Bacteria; p__Firmicutes; c__Clostridia; o__Clostridiales; f__Clostridiaceae; g__Clostridium; s__Clostridium sp. AT5	74.16404126	145.1456939	0.042904176	-0.968710006	0.333109424	Glucose-6-phosphate isomerase (GPI) (EC 5.3.1.9) (Phosphoglucose isomerase) (PGI) (Phosphohexose isomerase) (PHI)	#N/A
k99_1835337_2	k__Bacteria; p__Firmicutes; c__Clostridia; o__Clostridiales; f__Lachnospiraceae; g__Dorea; s__Dorea longicatena	69.8101247	135.7598306	0.023928826	-0.959548477	0.279968957	Glycine reductase	#N/A
k99_313769_1	k__Bacteria; p__Firmicutes; c__Clostridia; o__Clostridiales; f__Ruminococcaceae; g__Faecalibacterium; s__Faecalibacterium prausnitzii	50.46649702	96.96874693	0.04646338	-0.942193891	0.33358116	Translation elongation factor, EF-G1 (EC 3.6.5.3)	#N/A
k99_1987750_2	k__Bacteria; p__Firmicutes; c__Clostridia; o__Clostridiales; f__Ruminococcaceae; g__Faecalibacterium; s__Faecalibacterium prausnitzii	77.8900793	148.265092	0.008192094	-0.928667473	0.261910925	Galactose/methyl galactoside import ATP-binding protein MglA 1 (EC 7.5.2.11)	#N/A
Q9Y2J8	Human	90.74350526	172.2077509	0.031541491	-0.924283783	0.302054558	Protein-arginine deiminase type-2 (EC 3.5.3.15) (PAD-H19) (Peptidylarginine deiminase II) (Protein-arginine deiminase type II)	#N/A
k99_1894864_1	k__Bacteria; p__Firmicutes; c__Clostridia; o__Clostridiales; f__Ruminococcaceae; g__Faecalibacterium; s__uncultured Faecalibacterium sp.	45.12272557	85.23995107	0.03720231	-0.917675551	0.317746142	Acryloyl-CoA reductase electron transfer subunit gamma (Electron transfer flavoprotein small subunit) (ETFSS) (Electron transfer flavoprotein subunit gamma) (Gamma-ETF)	#N/A
k99_2313241_1	k__Bacteria; p__Firmicutes; c__Clostridia; o__Clostridiales; f__Ruminococcaceae; g__Subdoligranulum; s__Subdoligranulum sp. 60_17	48.00541074	90.37356911	0.015357927	-0.912703877	0.261910925	Pyruvate synthase (EC 1.2.7.1) (Fragment)	#N/A
k99_5436206_1	k__Bacteria; p__Firmicutes; c__Clostridia; o__Clostridiales; f__Ruminococcaceae; g__Faecalibacterium; s__Faecalibacterium sp. CAG:82	65.78243901	122.7030333	0.015456088	-0.899396509	0.261910925	ABC transporter, solute-binding protein	#N/A
k99_4358714_1	k__Bacteria; p__Firmicutes; c__Clostridia; o__Clostridiales; f__Ruminococcaceae; g__Faecalibacterium; s__Faecalibacterium prausnitzii	54.18939726	100.3663234	0.006828068	-0.889192768	0.261910925	Adenylosuccinate synthetase (AMPSase) (AdSS) (EC 6.3.4.4) (IMP--aspartate ligase)	#N/A
k99_10051063_1	k__Bacteria; p__Firmicutes; c__Clostridia; o__Clostridiales; f__Ruminococcaceae; g__Faecalibacterium; s__Faecalibacterium prausnitzii	60.84804999	111.3194803	0.017042566	-0.871423144	0.261910925	Glutamate dehydrogenase	#N/A
k99_1032349_1	k__Bacteria; p__Firmicutes; c__Clostridia; o__Clostridiales; f__Lachnospiraceae; g__Roseburia; s__Roseburia intestinalis	51.91297087	94.84089745	0.035257244	-0.869414262	0.312879584	Glutamate dehydrogenase (EC 1.4.1.4)	#N/A
k99_1210604_2	k__Bacteria; p__Firmicutes; c__Clostridia; o__Clostridiales; f__Ruminococcaceae; g__Faecalibacterium; s__Faecalibacterium prausnitzii	55.80068157	101.8391306	0.025777124	-0.867937359	0.286425994	Pyruvate carboxylase subunit B (EC 6.4.1.1) (Pyruvic carboxylase B)	#N/A
k99_5133730_1	k__Bacteria; p__Firmicutes; c__Clostridia; o__Clostridiales; f__Ruminococcaceae; g__Faecalibacterium; s__uncultured Faecalibacterium sp.	57.65270401	104.8743338	0.018720004	-0.863201466	0.268119689	Extracellular solute-binding protein family 1 (Fragment)	#N/A
k99_4166981_1	k__Bacteria; p__Firmicutes; c__Clostridia; o__Clostridiales; f__Ruminococcaceae; g__Faecalibacterium; s__Faecalibacterium prausnitzii	58.320534	105.6102996	0.045676397	-0.856674705	0.333361995	Pyruvate, phosphate dikinase (EC 2.7.9.1)	#N/A
k99_1457744_2	k__Bacteria; p__Firmicutes; c__Clostridia; o__Clostridiales; f__Ruminococcaceae; g__Faecalibacterium; s__Faecalibacterium prausnitzii	59.88268125	108.0411816	0.036316665	-0.851370599	0.315620487	Triosephosphate isomerase (TIM) (TPI) (EC 5.3.1.1) (Triose-phosphate isomerase)	#N/A
k99_219026_1	k__Bacteria; p__Firmicutes; c__Clostridia; o__Clostridiales; f__Ruminococcaceae; g__Subdoligranulum; s__Subdoligranulum sp. 60_17	54.97131591	98.46550848	0.016952292	-0.840939436	0.261910925	Acetate kinase (EC 2.7.2.1) (Acetokinase)	#N/A
P13727	Human	78.99422898	140.5389425	0.031111808	-0.831150784	0.302054558	Bone marrow proteoglycan (BMPG) (Proteoglycan 2) [Cleaved into: Eosinophil granule major basic protein (EMBP) (MBP) (Pregnancy-associated major basic protein)]	#N/A
k99_5059946_1	k__Bacteria; p__Firmicutes; c__Clostridia; o__Clostridiales; f__Ruminococcaceae; g__Faecalibacterium; s__Faecalibacterium sp. CAG:82	60.40059986	102.9669641	0.019756739	-0.769546755	0.270434822	Isoleucine--tRNA ligase (EC 6.1.1.5) (Isoleucyl-tRNA synthetase) (IleRS)	#N/A
k99_4621069_1	k__Bacteria; p__Firmicutes; c__Clostridia; o__Clostridiales; f__Lachnospiraceae; g__Blautia; s__Blautia massiliensis	74.63241298	126.4921052	0.045651785	-0.761173108	0.333361995	Glutamate dehydrogenase	#N/A
k99_4575434_1	k__Bacteria; p__Firmicutes; c__Clostridia; o__Clostridiales; f__Ruminococcaceae; g__Ruminococcus; s__uncultured Ruminococcus sp.	50.79426407	85.98491419	0.043340616	-0.759417975	0.333109424	Glyceraldehyde-3-phosphate dehydrogenase (EC 1.2.1.-)	#N/A
O00754	Human	121.093624	204.931662	0.048856785	-0.759019994	0.336284627	Lysosomal alpha-mannosidase (Laman) (EC 3.2.1.24) (Lysosomal acid alpha-mannosidase) (Mannosidase alpha class 2B member 1) (Mannosidase alpha-B) [Cleaved into: Lysosomal alpha-mannosidase A peptide; Lysosomal alpha-mannosidase B peptide; Lysosomal alpha-mannosidase C peptide; Lysosomal alpha-mannosidase D peptide; Lysosomal alpha-mannosidase E peptide]	#N/A
k99_3631980_2	k__Bacteria; p__Firmicutes; c__Clostridia; o__Clostridiales; f__Ruminococcaceae; g__Ruminococcus; s__uncultured Ruminococcus sp.	72.70544848	122.5104222	0.044150334	-0.7527691	0.333109424	Glyceraldehyde-3-phosphate dehydrogenase (EC 1.2.1.-)	#N/A
k99_6441554_1	k__Bacteria; p__Firmicutes; c__Clostridia; o__Clostridiales; f__Ruminococcaceae; g__Faecalibacterium; s__Faecalibacterium prausnitzii	51.69674341	87.06870209	0.048070205	-0.752080815	0.334214427	Pyruvate, phosphate dikinase (EC 2.7.9.1) (Pyruvate, orthophosphate dikinase)	#N/A
MTB_feature_7	Aminobenzenesulfonamides	528532.7191	857385.4702	0.0114136	-0.697951183	0.137841168		Massbank: Sulfadimethoxine
k99_2292464_1	k__Bacteria; p__Firmicutes; c__Clostridia; o__Clostridiales; f__Ruminococcaceae; g__Faecalibacterium; s__Faecalibacterium prausnitzii	62.25087497	97.14675625	0.044720995	-0.642071709	0.333109424	Translation elongation factor, EF-G1 (EC 3.6.5.3)	#N/A
k99_3053004_1	k__Bacteria; p__Firmicutes; c__Clostridia; o__Clostridiales; f__Ruminococcaceae; g__Faecalibacterium; s__Faecalibacterium prausnitzii	60.63760264	92.70418088	0.046468261	-0.612421688	0.33358116	60 kDa chaperonin (GroEL protein) (Protein Cpn60)	#N/A
k99_4051542_5	k__Bacteria; p__Firmicutes; c__Clostridia; o__; f__; g__; s__Clostridia bacterium UC5.1-1A9	104.3202872	78.34910055	0.04489837	0.413031128	0.333109424	Butyryl-CoA dehydrogenase (EC 1.3.8.1)	#N/A
k99_4878296_1	k__Bacteria; p__Firmicutes; c__Clostridia; o__Clostridiales; f__Lachnospiraceae; g__Blautia; s__Blautia sp. CAG:237	157.0095899	115.1084889	0.027845993	0.447858448	0.296039639	GTP-binding protein TypA	#N/A
k99_1481382_1	k__Bacteria; p__Firmicutes; c__Clostridia; o__Clostridiales; f__Lachnospiraceae; g__Blautia; s__uncultured Blautia sp.	128.5885944	93.99095674	0.035425355	0.452168823	0.312879584	Leucine--tRNA ligase	#N/A
k99_377499_2	k__Bacteria; p__Firmicutes; c__Clostridia; o__Clostridiales; f__Clostridiaceae; g__Clostridium; s__Clostridium sp. AT5	150.4598725	109.2404999	0.008178964	0.461870953	0.261910925	Glycine--tRNA ligase (EC 6.1.1.14) (Glycyl-tRNA synthetase) (GlyRS)	#N/A
k99_3487424_7	k__Bacteria; p__Firmicutes; c__; o__; f__; g__; s__Firmicutes bacterium CAG:424	153.7461433	110.5193022	0.021107477	0.476251863	0.276069074	Methionine--tRNA ligase (EC 6.1.1.10) (Methionyl-tRNA synthetase) (MetRS)	#N/A
k99_6778266_1	k__Bacteria; p__Firmicutes; c__Clostridia; o__Clostridiales; f__Lachnospiraceae; g__Blautia; s__uncultured Blautia sp.	151.4683936	108.8051709	0.046859	0.477269662	0.33358116	Deleted.	#N/A
k99_7546996_2	k__Bacteria; p__Firmicutes; c__Clostridia; o__Clostridiales; f__Lachnospiraceae; g__Blautia; s__[Ruminococcus] torques	140.9962755	100.7752394	0.027675437	0.484515843	0.296026332	BMC domain-containing protein	#N/A
k99_2750485_1	k__Bacteria; p__Firmicutes; c__Clostridia; o__Clostridiales; f__Ruminococcaceae; g__Ruminococcus; s__Ruminococcus sp. JC304	141.001182	100.5009344	0.047983313	0.488498342	0.334214427	Transcription termination factor Rho (EC 3.6.4.-) (ATP-dependent helicase Rho)	#N/A
k99_2072303_1	k__Bacteria; p__Firmicutes; c__Clostridia; o__Clostridiales; f__Lachnospiraceae; g__Blautia; s__Blautia obeum	153.476263	108.8549184	0.04658764	0.495608948	0.33358116	Deleted.	#N/A
k99_858404_1	k__Bacteria; p__Firmicutes; c__; o__; f__; g__; s__Firmicutes bacterium CAG:227	142.4470821	100.6789387	0.042890162	0.500664156	0.333109424	Phosphoribosylformylglycinamidine synthase	#N/A
k99_4212807_2	k__Bacteria; p__Firmicutes; c__Clostridia; o__Clostridiales; f__Clostridiaceae; g__Clostridium; s__Clostridium sp. CAG:299	131.796204	92.28667843	0.042167669	0.514114503	0.333109424	30S ribosomal protein S4	#N/A
k99_2746115_4	k__Bacteria; p__Firmicutes; c__Clostridia; o__Clostridiales; f__Clostridiaceae; g__Clostridium; s__Clostridium sp. AT5	147.2440061	103.0048528	0.012115648	0.515496599	0.261910925	Adenylosuccinate lyase (ASL) (EC 4.3.2.2) (Adenylosuccinase)	#N/A
k99_5136413_1	k__Bacteria; p__Firmicutes; c__Clostridia; o__Clostridiales; f__Lachnospiraceae; g__Blautia; s__Blautia sp. CAG:237	167.747931	117.0191753	0.020877236	0.519550017	0.276069074	Translation elongation factor 2 (EF-2/EF-G) (EC 3.6.5.3)	#N/A
k99_5653825_1	k__Bacteria; p__Firmicutes; c__Clostridia; o__Clostridiales; f__Ruminococcaceae; g__Ruminococcus; s__Ruminococcus sp. JC304	155.4601105	108.3623506	0.01677658	0.520680852	0.261910925	Microcompartments protein	#N/A
k99_9635264_1	k__Bacteria; p__Firmicutes; c__Clostridia; o__Clostridiales; f__Lachnospiraceae; g__Blautia; s__Blautia obeum	164.3055763	114.043396	0.017193591	0.526798538	0.261910925	4-hydroxy-3-methylbut-2-en-1-yl diphosphate synthase (flavodoxin) (EC 1.17.7.3) (1-hydroxy-2-methyl-2-(E)-butenyl 4-diphosphate synthase)	#N/A
k99_4116925_2	k__Bacteria; p__Firmicutes; c__Clostridia; o__Clostridiales; f__Lachnospiraceae; g__Blautia; s__Blautia obeum	144.4359212	100.1999522	0.01101199	0.527547764	0.261910925	V-type ATP synthase alpha chain (EC 7.1.2.2) (V-ATPase subunit A)	#N/A
k99_6326240_1	k__Bacteria; p__Firmicutes; c__Clostridia; o__Clostridiales; f__Lachnospiraceae; g__Blautia; s__Blautia obeum	142.9913067	98.98461998	0.028843361	0.530651155	0.298735044	Aspartate carbamoyltransferase (EC 2.1.3.2) (Aspartate transcarbamylase) (ATCase)	#N/A
k99_7805378_1	k__Bacteria; p__Firmicutes; c__Clostridia; o__Clostridiales; f__Lachnospiraceae; g__Blautia; s__Blautia massiliensis	167.4503244	115.6474401	0.017494787	0.53399984	0.263672076	Translation elongation factor 2 (EF-2/EF-G) (EC 3.6.5.3)	#N/A
k99_3018346_2	k__Bacteria; p__Firmicutes; c__Clostridia; o__Clostridiales; f__Lachnospiraceae; g__Roseburia; s__Roseburia faecis	146.9453999	101.4195541	0.022009364	0.53494436	0.276092894	Orotate phosphoribosyltransferase	#N/A
k99_6539752_1	k__Bacteria; p__Firmicutes; c__Clostridia; o__Clostridiales; f__Lachnospiraceae; g__Lachnoclostridium; s__Lachnoclostridium phocaeense	157.4479917	108.1432481	0.047897844	0.541931762	0.334214427	60 kDa chaperonin (GroEL protein) (Protein Cpn60)	#N/A
k99_2570132_2	k__Bacteria; p__Firmicutes; c__Clostridia; o__Clostridiales; f__Lachnospiraceae; g__Roseburia; s__Roseburia intestinalis	161.8624736	110.8739132	0.014092786	0.545848585	0.261910925	Ribosomal protein L23	#N/A
k99_403442_11	k__Bacteria; p__Firmicutes; c__Clostridia; o__Clostridiales; f__Ruminococcaceae; g__Ruminococcus; s__Ruminococcus sp. CAG:17	151.6189517	103.771819	0.038985638	0.547035387	0.323447073	Uncharacterized protein	#N/A
k99_671445_1	k__Bacteria; p__Firmicutes; c__Clostridia; o__Clostridiales; f__Lachnospiraceae; g__Blautia; s__Blautia obeum	154.7894465	105.6757835	0.017176434	0.550662304	0.261910925	30S ribosomal protein S3	#N/A
k99_3201723_1	k__Bacteria; p__Firmicutes; c__Clostridia; o__Clostridiales; f__Lachnospiraceae; g__Blautia; s__Blautia massiliensis	146.8626903	99.9953296	0.016989916	0.554535314	0.261910925	Methenyltetrahydrofolate cyclohydrolase	#N/A
k99_8387235_2	k__Bacteria; p__Firmicutes; c__Clostridia; o__Clostridiales; f__Clostridiaceae; g__Clostridium; s__Clostridium sp. CAG:413	129.8708044	88.38305375	0.029879472	0.555235458	0.300468275	60 kDa chaperonin	#N/A
k99_5680885_3	k__Bacteria; p__Firmicutes; c__Negativicutes; o__Selenomonadales; f__Selenomonadaceae; g__Megamonas; s__Megamonas sp. Marseille-P3344	139.1377535	94.65778211	0.043898224	0.555720908	0.333109424	60 kDa chaperonin (GroEL protein) (Protein Cpn60)	#N/A
k99_8361518_3	k__Bacteria; p__Firmicutes; c__Clostridia; o__Clostridiales; f__Lachnospiraceae; g__Blautia; s__Blautia sp. CAG:257	166.7288586	113.0689584	0.024674461	0.560300927	0.282207477	L-threonine dehydratase catabolic TdcB (EC 4.3.1.19) (Threonine deaminase)	#N/A
k99_4578923_1	k__Bacteria; p__Firmicutes; c__Clostridia; o__Clostridiales; f__Lachnospiraceae; g__Blautia; s__Blautia schinkii	168.5308653	113.935639	0.024007281	0.564793744	0.279968957	Glutamate--ammonia ligase, catalytic domain protein (EC 6.3.1.2)	#N/A
k99_3412481_1	k__Bacteria; p__Firmicutes; c__; o__; f__; g__; s__Firmicutes bacterium CAG:646	138.9025745	93.81096091	0.016449519	0.566244937	0.261910925	Phosphoenolpyruvate carboxykinase (ATP) (PCK) (PEP carboxykinase) (PEPCK) (EC 4.1.1.49)	#N/A
k99_10579296_1	k__Bacteria; p__Firmicutes; c__Clostridia; o__Clostridiales; f__Lachnospiraceae; g__Blautia; s__Blautia obeum	159.9835776	108.021598	0.024325281	0.566604024	0.279968957	Pyruvate-flavodoxin oxidoreductase	#N/A
k99_406918_9	k__Bacteria; p__Firmicutes; c__Clostridia; o__Clostridiales; f__Lachnospiraceae; g__Blautia; s__uncultured Blautia sp.	162.4354674	109.4252103	0.045942429	0.56992152	0.33346126	Galactose-1-phosphate uridylyltransferase (Gal-1-P uridylyltransferase) (EC 2.7.7.12) (UDP-glucose--hexose-1-phosphate uridylyltransferase)	#N/A
k99_752377_2	k__Bacteria; p__Firmicutes; c__Clostridia; o__Clostridiales; f__Clostridiaceae; g__Clostridium; s__Clostridium sp. CAG:127	131.6054608	88.56857127	0.020626858	0.571352602	0.276069074	Methionine--tRNA ligase (EC 6.1.1.10) (Methionyl-tRNA synthetase) (MetRS)	#N/A
k99_6898919_1	k__Bacteria; p__Firmicutes; c__Clostridia; o__Clostridiales; f__Lachnospiraceae; g__Blautia; s__Blautia obeum	156.15597	105.0837202	0.007391703	0.571448545	0.261910925	Inosine-5'-monophosphate dehydrogenase (EC 1.1.1.205)	#N/A
k99_2425482_2	k__Bacteria; p__Firmicutes; c__Clostridia; o__Clostridiales; f__Lachnospiraceae; g__Blautia; s__Blautia obeum	165.7793531	110.904893	0.017664632	0.579941322	0.263672076	Dihydroxy-acid dehydratase (DAD) (EC 4.2.1.9)	#N/A
k99_5561669_1	k__Bacteria; p__Firmicutes; c__Clostridia; o__Clostridiales; f__Lachnospiraceae; g__Dorea; s__Dorea formicigenerans CAG:28	145.7562002	97.48970509	0.019857818	0.580235471	0.270434822	Phosphoglycerate kinase (EC 2.7.2.3)	#N/A
k99_1831526_2	k__Bacteria; p__Firmicutes; c__Clostridia; o__Clostridiales; f__Clostridiaceae; g__Clostridium; s__Clostridium sp. AT5	170.0417902	113.453903	0.012823999	0.583783112	0.261910925	NifU_N domain-containing protein	#N/A
k99_9974542_1	k__Bacteria; p__Firmicutes; c__Clostridia; o__Clostridiales; f__Lachnospiraceae; g__Blautia; s__Blautia massiliensis	170.1266347	113.4058149	0.035972115	0.585114408	0.314696453	Ribose-phosphate pyrophosphokinase PrsA1 (EC 2.7.6.1)	#N/A
k99_3696928_2	k__Bacteria; p__Firmicutes; c__Clostridia; o__Clostridiales; f__Lachnospiraceae; g__Tyzzerella; s__Tyzzerella sp. Marseille-P3062	165.0508469	109.9751414	0.024919034	0.585733086	0.282558321	DNA-directed RNA polymerase subunit beta' (RNAP subunit beta') (EC 2.7.7.6) (RNA polymerase subunit beta') (Transcriptase subunit beta')	#N/A
k99_8122206_1	k__Bacteria; p__Firmicutes; c__Clostridia; o__Clostridiales; f__Lachnospiraceae; g__Blautia; s__Blautia massiliensis	165.6391638	109.8587587	0.028696916	0.592393929	0.298735044	Carbamate kinase	#N/A
k99_962777_1	k__Bacteria; p__Firmicutes; c__Clostridia; o__Clostridiales; f__Lachnospiraceae; g__Blautia; s__Blautia sp. Marseille-P3087	168.6748892	111.8179849	0.046741284	0.593092963	0.33358116	ATP-dependent zinc metalloprotease FtsH (EC 3.4.24.-)	#N/A
k99_5332953_2	k__Bacteria; p__Firmicutes; c__Clostridia; o__Clostridiales; f__Clostridiaceae; g__Clostridium; s__Clostridium perfringens	158.0617611	104.6317033	0.040883664	0.595168335	0.333109424	L-fucose isomerase (FucIase) (EC 5.3.1.25) (6-deoxy-L-galactose isomerase)	#N/A
k99_1979140_1	k__Bacteria; p__Firmicutes; c__Clostridia; o__Clostridiales; f__Clostridiaceae; g__Clostridium; s__Clostridium sp. CAG:7	148.9038579	97.87628346	0.017950714	0.605349907	0.266437	Deleted.	#N/A
k99_2230280_7	k__Bacteria; p__Firmicutes; c__Clostridia; o__Clostridiales; f__Lachnospiraceae; g__Blautia; s__Blautia obeum	135.3350635	88.7326564	0.049414396	0.608998607	0.33686891	Iron-sulfur cluster carrier protein	#N/A
k99_7949227_2	k__Bacteria; p__Firmicutes; c__Clostridia; o__Clostridiales; f__Ruminococcaceae; g__Ruminococcus; s__Ruminococcus gauvreauii	146.24102	95.84311885	0.032420656	0.609601277	0.30482339	30S ribosomal protein S10	#N/A
k99_9478831_6	k__Bacteria; p__Firmicutes; c__Clostridia; o__Clostridiales; f__Eubacteriaceae; g__Eubacterium; s__Eubacterium sp. CAG:38	154.4089765	100.937136	0.012373709	0.613299569	0.261910925	50S ribosomal protein L5	#N/A
k99_10023922_2	k__Bacteria; p__Firmicutes; c__Clostridia; o__Clostridiales; f__Lachnospiraceae; g__Blautia; s__Blautia wexlerae	162.6885105	106.2493878	0.046336759	0.614657839	0.33358116	Deleted.	#N/A
k99_9005815_1	k__Bacteria; p__Firmicutes; c__Clostridia; o__Clostridiales; f__Lachnospiraceae; g__Dorea; s__Dorea sp. AGR2135	167.0467697	109.0458119	0.028003559	0.615317723	0.296039639	60 kDa chaperonin (GroEL protein) (Protein Cpn60)	#N/A
k99_4641629_1	k__Bacteria; p__Firmicutes; c__Clostridia; o__Clostridiales; f__Lachnospiraceae; g__Tyzzerella; s__Tyzzerella sp. Marseille-P3062	140.4882654	91.44362179	0.022001615	0.619495181	0.276092894	DNA-directed RNA polymerase subunit beta (RNAP subunit beta) (EC 2.7.7.6) (RNA polymerase subunit beta) (Transcriptase subunit beta)	#N/A
k99_4060462_1	k__Bacteria; p__Firmicutes; c__Clostridia; o__Clostridiales; f__Lachnospiraceae; g__Blautia; s__[Ruminococcus] torques	165.372264	107.4498293	0.04258473	0.622054098	0.333109424	30S ribosomal protein S7	#N/A
k99_4035367_1	k__Bacteria; p__Firmicutes; c__Clostridia; o__Clostridiales; f__Ruminococcaceae; g__Ruminococcus; s__Ruminococcus sp. JC304	156.9147413	101.4418919	0.032147546	0.629327335	0.30333506	CobW/P47K family protein (Fragment)	#N/A
k99_5406068_1	k__Bacteria; p__Firmicutes; c__Clostridia; o__Clostridiales; f__Ruminococcaceae; g__Ruminococcus; s__Ruminococcus sp. JC304	142.7967097	92.05292589	0.016687048	0.633427254	0.261910925	Asparagine--tRNA ligase (EC 6.1.1.22) (Asparaginyl-tRNA synthetase) (AsnRS)	#N/A
k99_8087701_3	k__Bacteria; p__Firmicutes; c__Clostridia; o__Clostridiales; f__Lachnospiraceae; g__; s__Lachnospiraceae bacterium 6_1_63FAA	201.5072076	129.8784489	0.044504709	0.633669383	0.333109424	Pyrophosphate--fructose 6-phosphate 1-phosphotransferase (EC 2.7.1.90) (6-phosphofructokinase, pyrophosphate dependent) (PPi-dependent phosphofructokinase) (PPi-PFK) (Pyrophosphate-dependent 6-phosphofructose-1-kinase)	#N/A
k99_466565_3	k__Bacteria; p__Firmicutes; c__Clostridia; o__Clostridiales; f__Lachnospiraceae; g__Blautia; s__Blautia sp. CAG:257	148.5774871	95.6914481	0.032081007	0.634753628	0.30333506	Predicted secreted protein	#N/A
k99_2789530_2	k__Bacteria; p__Firmicutes; c__Clostridia; o__Clostridiales; f__Lachnospiraceae; g__Blautia; s__Blautia obeum	153.7012883	98.82090389	0.006032579	0.6372411	0.261910925	GMP synthase [glutamine-hydrolyzing] (EC 6.3.5.2) (GMP synthetase) (Glutamine amidotransferase)	#N/A
k99_12789_3	k__Bacteria; p__Firmicutes; c__Clostridia; o__Clostridiales; f__Ruminococcaceae; g__Ruminococcus; s__Ruminococcus lactaris	160.6709406	102.7698532	0.029234764	0.644691901	0.298735044	Chaperone protein DnaK (HSP70) (Heat shock 70 kDa protein) (Heat shock protein 70)	#N/A
k99_2170738_1	k__Bacteria; p__Bacteroidetes; c__Bacteroidia; o__; f__; g__; s__Bacteroidia bacterium UC5.1-2G11	171.7936098	109.6986758	0.030903928	0.647130263	0.302054558	Phosphoglucomutase (EC 5.4.2.2)	#N/A
k99_8781549_2	k__Bacteria; p__Firmicutes; c__Clostridia; o__Clostridiales; f__Ruminococcaceae; g__Ruminococcus; s__uncultured Ruminococcus sp.	139.927421	89.33899004	0.018793732	0.647316859	0.268119689	CO dehydrogenase/CO-methylating acetyl-CoA synthase complex, beta subunit (EC 1.2.99.2) (EC 2.3.1.169)	#N/A
k99_2868898_6	k__Bacteria; p__Bacteroidetes; c__Bacteroidia; o__Bacteroidales; f__Rikenellaceae; g__Alistipes; s__Alistipes finegoldii	156.7439117	99.47934283	0.027049806	0.655940525	0.292891749	Phosphoenolpyruvate carboxykinase (ATP) (PCK) (PEP carboxykinase) (PEPCK) (EC 4.1.1.49)	#N/A
k99_9782467_2	k__Bacteria; p__Firmicutes; c__Clostridia; o__Clostridiales; f__Lachnospiraceae; g__Blautia; s__Blautia wexlerae	162.661607	103.1649287	0.047655058	0.656921168	0.334214427	Elongation factor Tu (EF-Tu) (P-40)	#N/A
k99_7581318_1	k__Bacteria; p__Firmicutes; c__Clostridia; o__Clostridiales; f__Lachnospiraceae; g__Dorea; s__Dorea longicatena	203.799766	129.0582921	0.033425589	0.659129557	0.307701763	50S ribosomal protein L5	#N/A
k99_4381637_1	k__Bacteria; p__Firmicutes; c__Clostridia; o__Clostridiales; f__Lachnospiraceae; g__Blautia; s__Blautia obeum	155.008908	98.10468625	0.019370647	0.659957168	0.268248501	Oxaloacetate decarboxylase alpha chain (EC 4.1.1.3) (EC 4.1.1.41)	#N/A
k99_1770951_2	k__Bacteria; p__Firmicutes; c__Clostridia; o__Clostridiales; f__Lachnospiraceae; g__Blautia; s__[Ruminococcus] torques	170.2857207	107.7505954	0.005779305	0.660261622	0.261910925	Uncharacterized protein	#N/A
k99_5850520_1	k__Bacteria; p__Firmicutes; c__Clostridia; o__Clostridiales; f__Lachnospiraceae; g__Blautia; s__Blautia obeum	187.6975504	118.5282315	0.019021361	0.663179095	0.268119689	ABC transporter, ATP-binding protein (Fragment)	#N/A
k99_1800803_3	k__Bacteria; p__Firmicutes; c__Clostridia; o__Clostridiales; f__Lachnospiraceae; g__Blautia; s__Blautia sp. CAG:257	169.9946	106.7691818	0.031504076	0.670993636	0.302054558	NifU_N domain-containing protein	#N/A
k99_2906827_2	k__Bacteria; p__Firmicutes; c__Clostridia; o__; f__; g__; s__Clostridia bacterium UC5.1-1D4	173.7508326	108.9832477	0.015864845	0.672913501	0.261910925	Triosephosphate isomerase (TIM) (TPI) (EC 5.3.1.1) (Triose-phosphate isomerase)	#N/A
k99_8983612_1	k__Bacteria; p__Firmicutes; c__Clostridia; o__Clostridiales; f__Lachnospiraceae; g__Blautia; s__[Ruminococcus] torques	170.4420464	106.8984941	0.048360501	0.673039749	0.334472363	Inosine-5'-monophosphate dehydrogenase (IMP dehydrogenase) (IMPD) (IMPDH) (EC 1.1.1.205)	#N/A
k99_178001_1	k__Bacteria; p__Firmicutes; c__Clostridia; o__Clostridiales; f__Lachnospiraceae; g__Blautia; s__Blautia massiliensis	156.3524303	97.98253144	0.03423377	0.674205174	0.309745276	Heat shock protein 70 (Fragment)	#N/A
k99_2944904_1	k__Bacteria; p__Firmicutes; c__Clostridia; o__Clostridiales; f__Lachnospiraceae; g__Blautia; s__Blautia sp. CAG:257	172.0755547	107.8203508	0.011223731	0.674412652	0.261910925	Deleted.	#N/A
k99_4164463_1	k__Bacteria; p__Firmicutes; c__Clostridia; o__Clostridiales; f__Clostridiaceae; g__Clostridium; s__uncultured Clostridium sp.	130.0508272	81.48097385	0.001761827	0.674540448	0.261910925	DNA-directed RNA polymerase subunit alpha (EC 2.7.7.6)	#N/A
k99_2314727_1	k__Bacteria; p__Firmicutes; c__Clostridia; o__Clostridiales; f__Lachnospiraceae; g__Blautia; s__Blautia sp. CAG:237	159.7536728	100.0198036	0.0043667	0.675563421	0.261910925	Translation elongation factor 2 (EF-2/EF-G) (EC 3.6.5.3)	#N/A
k99_661981_2	k__Bacteria; p__Firmicutes; c__Clostridia; o__Clostridiales; f__Lachnospiraceae; g__Blautia; s__uncultured Blautia sp.	140.984307	88.17118565	0.011460204	0.677155419	0.261910925	Ribosomal subunit interface protein	#N/A
k99_5679086_4	k__Bacteria; p__Firmicutes; c__Clostridia; o__Clostridiales; f__Lachnospiraceae; g__Tyzzerella; s__Tyzzerella nexilis	160.9545869	100.6298165	0.030595553	0.677595854	0.300839772	ATP synthase subunit beta (EC 7.1.2.2) (ATP synthase F1 sector subunit beta) (F-ATPase subunit beta)	#N/A
k99_2937866_2	k__Bacteria; p__Firmicutes; c__Clostridia; o__Clostridiales; f__Lachnospiraceae; g__Blautia; s__Blautia sp. CAG:257	171.5948135	107.1821693	0.021068734	0.678941026	0.276069074	50S ribosomal protein L17	#N/A
k99_1184469_1	k__Bacteria; p__Firmicutes; c__Clostridia; o__Clostridiales; f__Ruminococcaceae; g__Ruminococcus; s__Ruminococcus sp. AT10	185.7167126	115.9229296	0.010528671	0.679937689	0.261910925	Phosphoenolpyruvate carboxykinase (ATP) (PCK) (PEP carboxykinase) (PEPCK) (EC 4.1.1.49)	#N/A
k99_4482651_1	k__Bacteria; p__Bacteroidetes; c__Bacteroidia; o__Bacteroidales; f__Bacteroidaceae; g__Bacteroides; s__Bacteroides dorei	167.5254226	104.3922533	0.021425496	0.682365389	0.276092894	L-rhamnose isomerase (EC 5.3.1.14)	#N/A
k99_1890888_2	k__Bacteria; p__Firmicutes; c__Clostridia; o__Clostridiales; f__Lachnospiraceae; g__Blautia; s__Blautia schinkii	181.9216746	113.2845921	0.01231206	0.683365787	0.261910925	Cell division protein FtsZ	#N/A
k99_5792014_1	k__Bacteria; p__Firmicutes; c__Clostridia; o__Clostridiales; f__Ruminococcaceae; g__Ruminococcus; s__Ruminococcus sp. JC304	150.275168	93.04297478	0.047257967	0.691637505	0.334214427	Aminotransferase, class I/II (EC 2.6.1.-)	#N/A
k99_2162830_1	k__Bacteria; p__Firmicutes; c__Clostridia; o__Clostridiales; f__Lachnospiraceae; g__Blautia; s__uncultured Blautia sp.	158.6446963	98.15203847	0.01313031	0.692709155	0.261910925	Deleted.	#N/A
k99_3300627_2	k__Bacteria; p__Firmicutes; c__Clostridia; o__Clostridiales; f__Lachnospiraceae; g__; s__Lachnospiraceae bacterium 5_1_57FAA	152.8556717	94.51586473	0.005176119	0.693541669	0.261910925	Putative ABC transporter ATP-binding protein YheS	#N/A
k99_8360252_1	k__Bacteria; p__Firmicutes; c__Clostridia; o__Clostridiales; f__Lachnospiraceae; g__Blautia; s__uncultured Blautia sp.	148.8861573	92.01970717	0.010362754	0.694194855	0.261910925	Glyceraldehyde-3-phosphate dehydrogenase (EC 1.2.1.-)	#N/A
k99_3647693_1	k__Bacteria; p__Firmicutes; c__Clostridia; o__Clostridiales; f__Lachnospiraceae; g__Blautia; s__Blautia sp. CAG:237	172.9389703	106.7561082	0.037297967	0.695944387	0.317746142	Leucine--tRNA ligase (EC 6.1.1.4) (Fragment)	#N/A
k99_5227170_1	k__Bacteria; p__Firmicutes; c__Clostridia; o__Clostridiales; f__Lachnospiraceae; g__Blautia; s__uncultured Blautia sp.	166.487996	102.5356085	0.019690326	0.699293146	0.270434822	Glucose-1-phosphate adenylyltransferase GlgD1 (EC 2.7.7.27)	#N/A
k99_4298266_5	k__Bacteria; p__Firmicutes; c__Clostridia; o__Clostridiales; f__Lachnospiraceae; g__Coprococcus; s__Coprococcus comes	186.4261218	114.7460759	0.03475833	0.700159206	0.312879584	50S ribosomal protein L1	#N/A
k99_8689285_4	k__Bacteria; p__Firmicutes; c__Clostridia; o__Clostridiales; f__Eubacteriaceae; g__Eubacterium; s__Eubacterium ramulus	158.9880165	97.75919232	0.042889163	0.701613758	0.333109424	50S ribosomal protein L19	#N/A
k99_7369039_1	k__Bacteria; p__Firmicutes; c__Clostridia; o__Clostridiales; f__Eubacteriaceae; g__Eubacterium; s__Eubacterium sp. CAG:581	171.1576272	105.193006	0.021339175	0.702286798	0.276092894	Fructose-bisphosphate aldolase	#N/A
k99_1761351_1	k__Bacteria; p__Firmicutes; c__Clostridia; o__Clostridiales; f__Ruminococcaceae; g__Ruminococcus; s__uncultured Ruminococcus sp.	162.9086735	99.99561462	0.017249243	0.704126687	0.261910925	Leucine--tRNA ligase (EC 6.1.1.4)	#N/A
k99_2889992_2	k__Bacteria; p__Firmicutes; c__Clostridia; o__Clostridiales; f__Clostridiaceae; g__Clostridium; s__Clostridium sp. CAG:299	165.9154539	101.6634487	0.010609739	0.706647193	0.261910925	Elongation factor G (EF-G) (Vegetative protein 19) (VEG19)	#N/A
k99_7152463_1	k__Bacteria; p__Firmicutes; c__Clostridia; o__Clostridiales; f__Lachnospiraceae; g__Blautia; s__[Ruminococcus] torques	175.6974546	107.6531034	0.015066383	0.706703381	0.261910925	Triosephosphate isomerase (TIM) (TPI) (EC 5.3.1.1) (Triose-phosphate isomerase)	#N/A
k99_8429389_1	k__Bacteria; p__Firmicutes; c__Clostridia; o__Clostridiales; f__Lachnospiraceae; g__Blautia; s__Blautia obeum	125.7760982	77.0146226	0.024791841	0.707653488	0.282327771	Uncharacterized protein	#N/A
k99_203233_1	k__Bacteria; p__Firmicutes; c__Clostridia; o__Clostridiales; f__Lachnospiraceae; g__Blautia; s__[Ruminococcus] torques	183.4107708	112.2420708	0.041904779	0.708464833	0.333109424	Aldehyde-alcohol dehydrogenase	#N/A
k99_2798459_1	k__Bacteria; p__Firmicutes; c__Clostridia; o__Clostridiales; f__Lachnospiraceae; g__Anaerostipes; s__Anaerostipes hadrus	170.2645805	103.464914	0.037558805	0.718636729	0.317746142	50S ribosomal protein L7/L12	#N/A
k99_109874_1	k__Bacteria; p__Firmicutes; c__Clostridia; o__Clostridiales; f__Lachnospiraceae; g__; s__Lachnospiraceae bacterium CAG:364	166.8251996	101.3441901	0.008045811	0.719073846	0.261910925	Chaperone protein DnaK (HSP70) (Heat shock 70 kDa protein) (Heat shock protein 70)	#N/A
k99_901709_1	k__Bacteria; p__Bacteroidetes; c__Bacteroidia; o__Bacteroidales; f__Bacteroidaceae; g__Bacteroides; s__Bacteroides sp. CAG:98	186.6047809	112.9093379	0.044422899	0.724821143	0.333109424	Probable transaldolase (EC 2.2.1.2)	#N/A
k99_4213240_1	k__Bacteria; p__Actinobacteria; c__Actinobacteria; o__Bifidobacteriales; f__Bifidobacteriaceae; g__Bifidobacterium; s__Bifidobacterium dentium	143.2890003	86.64369055	0.035084278	0.725761264	0.312879584	ATP-dependent Clp protease ATP-binding subunit ClpC1	#N/A
k99_210092_1	k__Bacteria; p__Firmicutes; c__Clostridia; o__Clostridiales; f__Lachnospiraceae; g__Blautia; s__Blautia obeum	180.9646027	108.8953021	0.012043964	0.732765813	0.261910925	Rhamnulokinase	#N/A
k99_6337834_1	k__Bacteria; p__Firmicutes; c__Clostridia; o__Clostridiales; f__Lachnospiraceae; g__Blautia; s__Blautia obeum	170.5679035	101.9819255	0.043986208	0.742032712	0.333109424	Pyruvate ferredoxin/flavodoxin oxidoreductase	#N/A
k99_7744479_1	k__Bacteria; p__Firmicutes; c__Clostridia; o__Clostridiales; f__Lachnospiraceae; g__Blautia; s__Blautia obeum	153.1428537	91.54458926	0.013002684	0.742331524	0.261910925	RNA polymerase sigma factor SigA	#N/A
k99_399504_1	k__Bacteria; p__Firmicutes; c__Clostridia; o__Clostridiales; f__Lachnospiraceae; g__Blautia; s__[Ruminococcus] torques	186.3437029	111.1175383	0.017188906	0.745879523	0.261910925	Uncharacterized protein	#N/A
k99_63786_1	k__Bacteria; p__Firmicutes; c__Clostridia; o__Clostridiales; f__Lachnospiraceae; g__Sellimonas; s__Sellimonas intestinalis	166.7292616	99.3401935	0.003605842	0.747057863	0.261910925	Deleted.	#N/A
k99_6267741_1	k__Bacteria; p__Firmicutes; c__Clostridia; o__Clostridiales; f__Lachnospiraceae; g__Blautia; s__Blautia sp. Marseille-P3087	174.4291854	103.1349423	0.021930495	0.758108249	0.276092894	50S ribosomal protein L6	#N/A
k99_302019_1	k__Bacteria; p__Bacteroidetes; c__Bacteroidia; o__Bacteroidales; f__Bacteroidaceae; g__Bacteroides; s__Bacteroides massiliensis	174.1942115	102.9257628	0.025378006	0.759092544	0.285849525	Malate dehydrogenase (EC 1.1.1.37)	#N/A
k99_4251227_4	k__Bacteria; p__Firmicutes; c__Clostridia; o__Clostridiales; f__Lachnospiraceae; g__Coprococcus; s__Coprococcus sp. HPP0074	157.2648205	92.87680292	0.000572351	0.759805765	0.261910925	50S ribosomal protein L22	#N/A
k99_5439944_1	k__Bacteria; p__Firmicutes; c__Clostridia; o__Clostridiales; f__Lachnospiraceae; g__Blautia; s__Blautia sp. CAG:257	204.0065456	120.3905268	0.019249883	0.760893567	0.268248501	Pyruvate, phosphate dikinase (EC 2.7.9.1) (Pyruvate, orthophosphate dikinase)	#N/A
k99_2238673_1	k__Bacteria; p__Firmicutes; c__Clostridia; o__Clostridiales; f__Eubacteriaceae; g__Eubacterium; s__Eubacterium ramulus	171.4812975	101.0935628	0.001745525	0.762360103	0.261910925	Triosephosphate isomerase (TIM) (TPI) (EC 5.3.1.1) (Triose-phosphate isomerase)	#N/A
k99_1216040_1	k__Bacteria; p__Firmicutes; c__Clostridia; o__Clostridiales; f__Lachnospiraceae; g__Blautia; s__Blautia obeum	188.9381384	111.2699178	0.043115296	0.763850342	0.333109424	BPG-independent PGAM N-terminal domain protein (Fragment)	#N/A
k99_1862869_2	k__Bacteria; p__Bacteroidetes; c__Bacteroidia; o__Bacteroidales; f__Bacteroidaceae; g__Bacteroides; s__Bacteroides massiliensis	200.4573028	117.9404997	0.020810741	0.765235765	0.276069074	Deleted.	#N/A
k99_1502026_1	k__Bacteria; p__Bacteroidetes; c__Bacteroidia; o__Bacteroidales; f__Bacteroidaceae; g__Bacteroides; s__Bacteroides coprocola CAG:162	180.5776383	106.234062	0.010776267	0.765372835	0.261910925	Glutamate dehydrogenase	#N/A
k99_4619473_1	k__Bacteria; p__Firmicutes; c__Clostridia; o__Clostridiales; f__Lachnospiraceae; g__Blautia; s__Blautia sp. Marseille-P3201T	187.5726028	110.3009175	0.036131934	0.76600433	0.315051387	Formate--tetrahydrofolate ligase (EC 6.3.4.3) (Formyltetrahydrofolate synthetase) (FHS) (FTHFS)	#N/A
k99_9067316_1	k__Bacteria; p__Firmicutes; c__Clostridia; o__Clostridiales; f__Lachnospiraceae; g__Blautia; s__Blautia wexlerae	173.7892158	102.1747967	0.040903476	0.766299187	0.333109424	Elongation factor Tu (EC 3.6.5.3) (Fragment)	#N/A
k99_4058746_2	k__Bacteria; p__Firmicutes; c__Clostridia; o__Clostridiales; f__Clostridiaceae; g__Clostridium; s__Clostridium sp. AT5	165.61043	97.34576374	0.004300175	0.766603433	0.261910925	Elongation factor G (EF-G) (Vegetative protein 19) (VEG19)	#N/A
k99_1083105_4	k__Bacteria; p__Firmicutes; c__Clostridia; o__Clostridiales; f__Clostridiaceae; g__Clostridium; s__Clostridium sp. AT5	179.031022	104.9655331	0.021315355	0.770293919	0.276092894	Glutamate synthase (NADPH), homotetrameric	#N/A
k99_2646986_2	k__Bacteria; p__Firmicutes; c__Clostridia; o__Clostridiales; f__Clostridiaceae; g__Clostridium; s__Clostridium sp. CAG:43	152.5084092	89.4059233	0.012323379	0.770446473	0.261910925	60 kDa chaperonin (GroEL protein) (Protein Cpn60)	#N/A
k99_1099650_4	k__Bacteria; p__Firmicutes; c__Clostridia; o__Clostridiales; f__; g__; s__Clostridiales bacterium VE202-28	182.0578117	105.9227273	0.016005714	0.781384471	0.261910925	TWA4_scaffold00001, whole genome shotgun sequence	#N/A
k99_8901461_7	k__Bacteria; p__Bacteroidetes; c__Bacteroidia; o__Bacteroidales; f__Bacteroidaceae; g__Bacteroides; s__uncultured Bacteroides sp.	232.0345116	133.0713487	0.039936352	0.802139419	0.328697331	Propionyl-CoA carboxylase beta chain, mitochondrial	#N/A
k99_4196446_1	k__Bacteria; p__Firmicutes; c__Clostridia; o__Clostridiales; f__Lachnospiraceae; g__Blautia; s__Blautia obeum	174.5349535	100.0753851	0.013563398	0.802428821	0.261910925	Methionine--tRNA ligase (EC 6.1.1.10) (Methionyl-tRNA synthetase) (MetRS)	#N/A
k99_4084127_2	k__Bacteria; p__Firmicutes; c__Clostridia; o__Clostridiales; f__Lachnospiraceae; g__Blautia; s__Blautia producta	185.2920414	105.7184563	0.004043478	0.809573653	0.261910925	UDP-glucose 4-epimerase (EC 5.1.3.2)	#N/A
k99_516521_1	k__Bacteria; p__Firmicutes; c__Clostridia; o__Clostridiales; f__Lachnospiraceae; g__Blautia; s__Blautia sp. Marseille-P3087	174.1568399	99.35933101	0.042786817	0.80965977	0.333109424	Uncharacterized protein (Fragment)	#N/A
k99_800300_1	k__Bacteria; p__Firmicutes; c__Clostridia; o__Clostridiales; f__Lachnospiraceae; g__Blautia; s__Blautia massiliensis	171.6759285	97.9255534	0.008054838	0.809930485	0.261910925	Chaperone protein DnaK	#N/A
k99_6064343_1	k__Bacteria; p__Firmicutes; c__Erysipelotrichia; o__Erysipelotrichales; f__Erysipelotrichaceae; g__Catenibacterium; s__Catenibacterium mitsuokai	139.0296281	79.1400634	0.015593867	0.812912237	0.261910925	UDP-glucose 4-epimerase (EC 5.1.3.2)	#N/A
k99_8924300_1	k__Bacteria; p__Firmicutes; c__Clostridia; o__Clostridiales; f__Lachnospiraceae; g__Blautia; s__Blautia obeum	184.9560825	104.8607981	0.011118286	0.818707315	0.261910925	Putative amidohydrolase	#N/A
k99_402800_1	k__Bacteria; p__Firmicutes; c__; o__; f__; g__; s__Firmicutes bacterium CAG_194_44_15	172.9437485	97.90806819	0.003463601	0.820803208	0.261910925	50S ribosomal protein L6	#N/A
k99_873066_1	k__Bacteria; p__Firmicutes; c__Clostridia; o__Clostridiales; f__Lachnospiraceae; g__Blautia; s__Blautia sp. CAG:257	169.2391773	95.61281537	0.030134153	0.823787671	0.300468275	Anaerobic carbon monoxide dehydrogenase catalytic beta subunit (Fragment)	#N/A
k99_4522734_2	k__Bacteria; p__Firmicutes; c__Clostridia; o__Clostridiales; f__Clostridiaceae; g__Clostridium; s__uncultured Clostridium sp.	195.0666682	109.5596693	0.035909103	0.832250463	0.314696453	Fumarate reductase/succinate dehydrogenase flavoprotein domain protein	#N/A
k99_3638470_1	k__Bacteria; p__Firmicutes; c__Clostridia; o__Clostridiales; f__Lachnospiraceae; g__Blautia; s__Blautia sp. CAG:257	159.8148407	89.70438716	0.023520308	0.833150936	0.279968957	30S ribosomal protein S2 (BS1) (Vegetative protein 209) (VEG209)	#N/A
k99_2948258_1	k__Bacteria; p__Firmicutes; c__Clostridia; o__Clostridiales; f__Lachnospiraceae; g__Dorea; s__Dorea longicatena	170.9679488	95.88542313	0.003583899	0.834342477	0.261910925	60 kDa chaperonin (GroEL protein) (Protein Cpn60)	#N/A
k99_7588936_3	k__Bacteria; p__Bacteroidetes; c__Bacteroidia; o__Bacteroidales; f__Bacteroidaceae; g__Bacteroides; s__Bacteroides dorei	213.1783609	119.2722305	0.049259578	0.837802814	0.33686891	Putative outer membrane protein, probably involved in nutrient binding	#N/A
k99_5789680_1	k__Bacteria; p__Firmicutes; c__Clostridia; o__Clostridiales; f__Lachnospiraceae; g__Blautia; s__Blautia obeum	175.9242901	97.99414805	0.049872351	0.844187188	0.33686891	50S ribosomal protein L1	#N/A
k99_4492022_3	k__Bacteria; p__Firmicutes; c__Clostridia; o__Clostridiales; f__Lachnospiraceae; g__Blautia; s__Blautia sp. CAG:257	181.734287	100.8525257	0.025425677	0.849583418	0.285849525	50S ribosomal protein L15	#N/A
k99_256994_1	k__Bacteria; p__Firmicutes; c__Clostridia; o__Clostridiales; f__Lachnospiraceae; g__Blautia; s__Blautia wexlerae	178.8011167	99.18787858	0.005145701	0.850120017	0.261910925	Phosphoribosylformylglycinamidine synthase (EC 6.3.5.3)	#N/A
k99_10207998_3	k__Bacteria; p__Firmicutes; c__Clostridia; o__Clostridiales; f__Lachnospiraceae; g__Blautia; s__Blautia sp. CAG:237	155.4340535	86.10308744	0.004060273	0.852165739	0.261910925	Protein translocase subunit SecA	#N/A
k99_8376145_1	k__Bacteria; p__Firmicutes; c__Clostridia; o__Clostridiales; f__Lachnospiraceae; g__Blautia; s__uncultured Blautia sp.	172.4312825	95.27164168	0.004583335	0.855902778	0.261910925	PFK domain-containing protein	#N/A
k99_1214471_1	k__Bacteria; p__Firmicutes; c__; o__; f__; g__; s__Firmicutes bacterium CAG:424	176.0686871	96.6114746	0.000950682	0.865871902	0.261910925	Pyruvate carboxylase subunit B	#N/A
k99_1842823_3	k__Bacteria; p__Firmicutes; c__Clostridia; o__Clostridiales; f__Lachnospiraceae; g__Blautia; s__[Ruminococcus] torques	154.2151228	84.51531536	0.046969035	0.86765954	0.33358116	50S ribosomal protein L10	#N/A
k99_1992759_1	k__Bacteria; p__Firmicutes; c__Clostridia; o__Clostridiales; f__Lachnospiraceae; g__Blautia; s__Blautia obeum	176.2984175	96.55582239	0.010741694	0.868584362	0.261910925	4-hydroxy-3-methylbut-2-enyl diphosphate reductase (HMBPP reductase) (EC 1.17.7.4)	#N/A
k99_5929589_2	k__Bacteria; p__Bacteroidetes; c__Bacteroidia; o__Bacteroidales; f__Bacteroidaceae; g__Bacteroides; s__Bacteroides finegoldii	179.0702166	97.98451322	0.047827707	0.869899755	0.334214427	L-rhamnose isomerase (EC 5.3.1.14)	#N/A
k99_217566_2	k__Bacteria; p__Firmicutes; c__Clostridia; o__Clostridiales; f__Lachnospiraceae; g__Blautia; s__Blautia obeum	221.7205129	120.8051021	0.027011315	0.876060864	0.292891749	Translation elongation factor 2 (EF-2/EF-G) (EC 3.6.5.3)	#N/A
k99_1669135_1	k__Bacteria; p__Firmicutes; c__Clostridia; o__Clostridiales; f__Eubacteriaceae; g__Eubacterium; s__Eubacterium ramulus	149.4173776	81.07028035	0.021686713	0.882102909	0.276092894	L-arabinose isomerase (EC 5.3.1.4)	#N/A
k99_1273932_1	k__Bacteria; p__Firmicutes; c__Clostridia; o__Clostridiales; f__Lachnospiraceae; g__Blautia; s__Blautia sp. CAG:237	195.0787183	105.4420695	0.011998114	0.887605807	0.261910925	ATP-dependent zinc metalloprotease FtsH (EC 3.4.24.-)	#N/A
k99_2108828_1	k__Bacteria; p__Firmicutes; c__Clostridia; o__Clostridiales; f__Eubacteriaceae; g__Eubacterium; s__Eubacterium sp. CAG:248	192.5420063	103.8369432	0.019053285	0.89085341	0.268119689	ATP-dependent chaperone protein ClpB	#N/A
k99_775864_1	k__Bacteria; p__Firmicutes; c__Clostridia; o__Clostridiales; f__Ruminococcaceae; g__Ruminococcus; s__Ruminococcus sp. JC304	199.2276201	107.3238429	0.013899013	0.892447052	0.261910925	30S ribosomal protein S5	#N/A
k99_6875513_1	k__Bacteria; p__Firmicutes; c__Clostridia; o__Clostridiales; f__Ruminococcaceae; g__Ruminococcus; s__uncultured Ruminococcus sp.	186.9159889	100.6477508	0.003477605	0.893075051	0.261910925	Uncharacterized protein	#N/A
MTB_feature_11	Dihydroxy bile acids, alcohols and derivatives	7519587.552	4040841.98	0.003073258	0.895997598	0.10945633		(R)-4-((3S,5S,7S,8R,9S,10S,13R,14S,17R)-3,7-dihydroxy-10,13-dimethylhexadecahydro-1H-cyclopenta[a]phenanthren-17-yl)pentanoic acid
k99_10513418_1	k__Bacteria; p__Firmicutes; c__Clostridia; o__Clostridiales; f__Lachnospiraceae; g__Blautia; s__Blautia wexlerae	197.6422549	105.9325889	0.029136612	0.899744935	0.298735044	Translation elongation factor 2 (EF-2/EF-G) (EC 3.6.5.3)	#N/A
k99_559550_1	k__Bacteria; p__Firmicutes; c__Clostridia; o__Clostridiales; f__Lachnospiraceae; g__Blautia; s__Blautia obeum	197.1855715	105.4961444	0.012028288	0.902363718	0.261910925	Uncharacterized protein (Fragment)	#N/A
k99_8997538_1	k__Bacteria; p__Firmicutes; c__Clostridia; o__Clostridiales; f__Lachnospiraceae; g__Blautia; s__Blautia wexlerae	197.1574343	105.0103403	0.002043339	0.908816715	0.261910925	Nicotinate phosphoribosyltransferase (EC 6.3.4.21)	#N/A
k99_495871_1	k__Bacteria; p__Firmicutes; c__Clostridia; o__Clostridiales; f__Ruminococcaceae; g__Ruminococcus; s__Ruminococcus sp. Marseille-P328	175.4291073	93.41557206	0.016950459	0.909153173	0.261910925	Fucose_iso_C domain-containing protein	#N/A
k99_9861374_1	k__Bacteria; p__Firmicutes; c__Clostridia; o__Clostridiales; f__Ruminococcaceae; g__Ruminococcus; s__Ruminococcus sp. JC304	167.1807186	88.97372382	0.016388412	0.909957227	0.261910925	60 kDa chaperonin (Fragment)	#N/A
k99_1039864_18	k__Bacteria; p__Bacteroidetes; c__Bacteroidia; o__Bacteroidales; f__Bacteroidaceae; g__Bacteroides; s__Bacteroides coprocola	220.5081276	117.2279941	0.045137462	0.911514705	0.333109424	Ion-translocating oxidoreductase complex subunit C (EC 7.-.-.-) (Rnf electron transport complex subunit C)	#N/A
k99_5267668_1	k__Bacteria; p__Firmicutes; c__Clostridia; o__Clostridiales; f__Lachnospiraceae; g__Blautia; s__Blautia wexlerae	189.339131	100.3896912	0.031459682	0.915361477	0.302054558	ATP synthase subunit alpha (EC 7.1.2.2) (ATP synthase F1 sector subunit alpha) (F-ATPase subunit alpha)	#N/A
k99_5970492_1	k__Bacteria; p__Firmicutes; c__Clostridia; o__Clostridiales; f__Lachnospiraceae; g__Blautia; s__Blautia wexlerae	189.3742607	100.3082305	0.009958133	0.91680027	0.261910925	30S ribosomal protein S19	#N/A
k99_7094013_1	k__Bacteria; p__Firmicutes; c__Clostridia; o__Clostridiales; f__Lachnospiraceae; g__Blautia; s__Blautia wexlerae	227.7405116	120.5342456	0.029565398	0.917947851	0.300429924	Uncharacterized protein	#N/A
k99_470278_1	k__Bacteria; p__Firmicutes; c__Clostridia; o__Clostridiales; f__Lachnospiraceae; g__Blautia; s__Blautia sp. Marseille-P3087	183.255552	96.94574782	0.000395073	0.918607381	0.260945546	50S ribosomal protein L18	#N/A
k99_3701346_1	k__Bacteria; p__Firmicutes; c__Clostridia; o__Clostridiales; f__Lachnospiraceae; g__Blautia; s__Blautia obeum	188.5863005	99.60378318	0.010811178	0.920952433	0.261910925	Amino acid kinase family (Fragment)	#N/A
k99_1955851_1	k__Bacteria; p__Firmicutes; c__Clostridia; o__Clostridiales; f__Lachnospiraceae; g__Blautia; s__Blautia obeum	169.9339041	89.60963132	0.02580219	0.923248011	0.286425994	Pyruvate, phosphate dikinase (EC 2.7.9.1)	#N/A
k99_8713939_1	k__Bacteria; p__Firmicutes; c__Clostridia; o__Clostridiales; f__Lachnospiraceae; g__; s__[Eubacterium] rectale	169.7430103	89.38952303	0.043310814	0.925174514	0.333109424	Alpha-N-arabinofuranosidase 2	#N/A
k99_2101504_1	k__Bacteria; p__Bacteroidetes; c__Bacteroidia; o__Bacteroidales; f__Bacteroidaceae; g__Bacteroides; s__Bacteroides dorei	174.0193937	91.31525232	0.00318138	0.93032034	0.261910925	Alpha-amylase (EC 3.2.1.1)	#N/A
k99_335133_1	k__Bacteria; p__Bacteroidetes; c__Bacteroidia; o__Bacteroidales; f__Bacteroidaceae; g__Bacteroides; s__Bacteroides sp. CAG:98	215.7448276	112.7831037	0.024314543	0.935775022	0.279968957	Alpha-glucan phosphorylase (EC 2.4.1.1)	#N/A
k99_10381415_2	k__Bacteria; p__Firmicutes; c__Clostridia; o__Clostridiales; f__Lachnospiraceae; g__Blautia; s__Blautia sp. CAG:237	209.5166865	109.242028	0.019078918	0.939537146	0.268119689	Molecular chaperone, HSP90 family	#N/A
k99_4900645_1	k__Bacteria; p__Firmicutes; c__Clostridia; o__Clostridiales; f__Lachnospiraceae; g__Blautia; s__Blautia obeum	168.0077021	87.09073192	0.043130072	0.94793627	0.333109424	Monosaccharide ABC transporter substrate-binding protein CUT2 family (TC 3.A.1.2.-)	#N/A
k99_1505340_4	k__Bacteria; p__Firmicutes; c__Clostridia; o__; f__; g__; s__Clostridia bacterium UC5.1-1D4	219.494643	113.6280577	0.02839359	0.949866613	0.298735044	60 kDa chaperonin (GroEL protein) (Protein Cpn60)	#N/A
Q14315	Human	135.6647722	69.95118356	0.012913609	0.955625774	0.261910925	Filamin-C (FLN-C) (FLNc) (ABP-280-like protein) (ABP-L) (Actin-binding-like protein) (Filamin-2) (Gamma-filamin)	#N/A
k99_4019452_2	k__Bacteria; p__Firmicutes; c__Clostridia; o__Clostridiales; f__Lachnospiraceae; g__Anaerostipes; s__Anaerostipes hadrus	157.8896145	81.06739989	0.022363315	0.961722501	0.276092894	50S ribosomal protein L5 (BL5) (BstL5)	#N/A
k99_3657637_1	k__Bacteria; p__Firmicutes; c__Clostridia; o__Clostridiales; f__Lachnospiraceae; g__Blautia; s__[Ruminococcus] torques	182.1951205	93.38357564	0.000192193	0.964243586	0.253886658	Pyruvate synthase (EC 1.2.7.1) (Fragment)	#N/A
k99_4667975_1	k__Bacteria; p__Firmicutes; c__Clostridia; o__Clostridiales; f__Lachnospiraceae; g__Blautia; s__Blautia sp. CAG:237	222.5740103	113.903965	0.012354114	0.966467172	0.261910925	Selenium metabolism protein SsnA	#N/A
k99_114798_1	k__Bacteria; p__Firmicutes; c__Clostridia; o__Clostridiales; f__Lachnospiraceae; g__Blautia; s__Blautia wexlerae	197.4851394	101.0545996	0.024161896	0.966609108	0.279968957	Fumarate reductase/succinate dehydrogenase flavoprotein domain protein	#N/A
k99_1114477_3	k__Bacteria; p__Firmicutes; c__Clostridia; o__Clostridiales; f__Lachnospiraceae; g__Blautia; s__Blautia obeum	214.1687411	109.3430774	0.00989936	0.969886043	0.261910925	30S ribosomal protein S9	#N/A
k99_3293373_3	k__Bacteria; p__Firmicutes; c__Clostridia; o__Clostridiales; f__Lachnospiraceae; g__Blautia; s__Blautia sp. CAG:257	169.85137	86.69335187	0.033040565	0.970279586	0.307523617	Adenylate kinase (EC 2.7.4.3) (Fragment)	#N/A
k99_1127987_2	k__Bacteria; p__Firmicutes; c__Clostridia; o__Clostridiales; f__Lachnospiraceae; g__Coprococcus; s__Coprococcus sp. HPP0048	237.0406851	120.5760257	0.018854894	0.975191618	0.268119689	Glycine/sarcosine/betaine reductase complex component C subunit beta (Protein PC beta) (EC 1.21.4.2) (EC 1.21.4.3) (EC 1.21.4.4)	#N/A
k99_9333530_1	k__Bacteria; p__Bacteroidetes; c__Bacteroidia; o__Bacteroidales; f__Porphyromonadaceae; g__Parabacteroides; s__Parabacteroides merdae	286.3235799	145.4655236	0.033384223	0.976969223	0.307701763	Fumarate reductase	#N/A
MTB_feature_444	unclassified	603258.9933	305675.5722	0.00917456	0.980776253	0.137841168		missing
k99_9784279_1	k__Bacteria; p__Bacteroidetes; c__Bacteroidia; o__; f__; g__; s__Bacteroidia bacterium UC5.1-2G11	224.0657662	113.1906596	0.011196019	0.985167331	0.261910925	Beta-galactosidase (EC 3.2.1.23) (Lactase)	#N/A
k99_2259343_4	k__Bacteria; p__Firmicutes; c__Clostridia; o__Clostridiales; f__Clostridiaceae; g__Clostridium; s__Clostridium sp. AT5	282.1887238	142.1857409	0.037119699	0.988883548	0.317746142	Chaperone protein DnaK (HSP70) (Heat shock 70 kDa protein) (Heat shock protein 70)	#N/A
k99_1726479_1	k__Bacteria; p__Firmicutes; c__Clostridia; o__Clostridiales; f__Lachnospiraceae; g__Blautia; s__Blautia sp. Marseille-P2398	185.6855411	93.48236658	0.029812183	0.990095318	0.300468275	Uncharacterized protein	#N/A
k99_2232289_3	k__Bacteria; p__Firmicutes; c__Clostridia; o__Clostridiales; f__; g__; s__Clostridiales bacterium VE202-27	140.6121201	70.63640054	0.029285532	0.99323722	0.298735044	3-hydroxybutyryl-CoA dehydrogenase (EC 1.1.1.157)	#N/A
k99_1616236_1	k__Bacteria; p__Firmicutes; c__Clostridia; o__Clostridiales; f__Lachnospiraceae; g__Blautia; s__[Ruminococcus] gnavus	225.0616964	112.7529415	0.011251092	0.997155472	0.261910925	Acetate kinase (EC 2.7.2.1) (Acetokinase)	#N/A
k99_10145925_1	k__Bacteria; p__Bacteroidetes; c__Bacteroidia; o__Bacteroidales; f__Bacteroidaceae; g__Bacteroides; s__Bacteroides dorei	194.9916045	97.59140737	0.025641754	0.998585976	0.286425994	Uncharacterized protein (Fragment)	#N/A
k99_3099764_1	k__Bacteria; p__Firmicutes; c__Clostridia; o__Clostridiales; f__Lachnospiraceae; g__Blautia; s__Blautia wexlerae	203.3424641	100.94833	0.039053602	1.010294482	0.323447073	Fumarate reductase/succinate dehydrogenase flavoprotein domain protein	#N/A
k99_158239_1	k__Bacteria; p__Firmicutes; c__Clostridia; o__Clostridiales; f__Lachnospiraceae; g__Blautia; s__Blautia obeum	195.4635744	96.78803234	0.012738371	1.013999202	0.261910925	L-arabinose isomerase (EC 5.3.1.4)	#N/A
k99_2420965_1	k__Bacteria; p__Firmicutes; c__Clostridia; o__Clostridiales; f__Lachnospiraceae; g__Blautia; s__uncultured Blautia sp.	211.5857049	104.5916499	0.020512094	1.016474482	0.276069074	Acetate kinase (EC 2.7.2.1) (Acetokinase)	#N/A
k99_124660_1	k__Bacteria; p__Firmicutes; c__Clostridia; o__Clostridiales; f__Lachnospiraceae; g__Blautia; s__Blautia schinkii	212.2868706	104.7820243	0.004973443	1.018623907	0.261910925	Glutamate synthase [NADPH] small chain (EC 1.4.1.13)	#N/A
k99_4093070_1	k__Bacteria; p__Firmicutes; c__Clostridia; o__Clostridiales; f__Lachnospiraceae; g__Blautia; s__Blautia obeum	192.6224509	94.72091427	0.004085682	1.024020954	0.261910925	Elongation factor Tu (EF-Tu) (P-40)	#N/A
k99_3256479_1	k__Bacteria; p__Bacteroidetes; c__Bacteroidia; o__Bacteroidales; f__Bacteroidaceae; g__Bacteroides; s__Bacteroides vulgatus	225.5093845	109.9091394	0.023505535	1.036876114	0.279968957	Fumarate reductase	#N/A
k99_2740925_1	k__Bacteria; p__Firmicutes; c__Clostridia; o__Clostridiales; f__Clostridiaceae; g__Clostridium; s__uncultured Clostridium sp.	184.0878026	89.33003369	0.01009777	1.043176827	0.261910925	67 kDa myosin-cross-reactive antigen family protein	#N/A
k99_725467_1	k__Bacteria; p__Firmicutes; c__Clostridia; o__Clostridiales; f__Lachnospiraceae; g__Blautia; s__Blautia wexlerae	206.0667403	99.78142902	0.036613031	1.046268433	0.317038995	Uncharacterized protein	#N/A
k99_851463_1	k__Bacteria; p__Bacteroidetes; c__Bacteroidia; o__Bacteroidales; f__Bacteroidaceae; g__Bacteroides; s__Bacteroides dorei	217.7373408	104.5950196	0.035527583	1.057774686	0.312879584	Deleted.	#N/A
Q5JXI8	Human	210.3604412	100.9228548	0.039796281	1.059610507	0.328568043	Four and a half LIM domains protein 1 (Fragment)	#N/A
k99_2911046_1	k__Bacteria; p__Firmicutes; c__Clostridia; o__Clostridiales; f__Lachnospiraceae; g__Blautia; s__Blautia obeum	204.157461	97.08505389	0.026808882	1.072361175	0.292891749	L-lactate dehydrogenase (L-LDH) (EC 1.1.1.27)	#N/A
k99_2998411_1	k__Bacteria; p__Firmicutes; c__Clostridia; o__Clostridiales; f__Lachnospiraceae; g__Blautia; s__[Ruminococcus] torques	207.4519294	98.27191923	0.00204226	1.077925938	0.261910925	Glyceraldehyde-3-phosphate dehydrogenase (EC 1.2.1.-)	#N/A
k99_9758444_3	k__Bacteria; p__Firmicutes; c__Clostridia; o__Clostridiales; f__Lachnospiraceae; g__Blautia; s__Blautia wexlerae	212.3578222	100.501833	0.031831297	1.079275437	0.302511823	60 kDa chaperonin (GroEL protein) (Protein Cpn60)	#N/A
k99_1214175_7	k__Bacteria; p__Firmicutes; c__Clostridia; o__Clostridiales; f__Lachnospiraceae; g__Blautia; s__Blautia sp. CAG:237	216.7079266	102.5011994	0.011390107	1.080111134	0.261910925	Periplasmic binding protein/LacI transcriptional regulator	#N/A
k99_10207958_1	k__Bacteria; p__Firmicutes; c__Clostridia; o__Clostridiales; f__Lachnospiraceae; g__; s__Lachnospiraceae bacterium A2	206.5495855	97.66201425	0.00231315	1.080618726	0.261910925	30S ribosomal protein S10	#N/A
G900142955	k__Bacteria;p__Firmicutes;c__Clostridia;o__Clostridiales;f__Lachnospiraceae;g__Anaerosporobacter;s__Anaerosporobacter mobilis	31.83333333	15.04166667	0.041423337	1.081573801	0.786117268	1.081573801	#N/A
k99_1576839_1	k__Bacteria; p__Firmicutes; c__Clostridia; o__Clostridiales; f__Ruminococcaceae; g__Drancourtella; s__Drancourtella massiliensis	248.3100183	116.8980642	0.044501478	1.08689143	0.333109424	Chaperone protein DnaK (HSP70) (Heat shock 70 kDa protein) (Heat shock protein 70)	#N/A
k99_1842823_2	k__Bacteria; p__Firmicutes; c__Clostridia; o__Clostridiales; f__Lachnospiraceae; g__Blautia; s__[Ruminococcus] torques	201.4675342	94.57396801	0.009997347	1.091032338	0.261910925	50S ribosomal protein L7/L12 (BL13) (Ribosomal protein 'A')	#N/A
G000233455	k__Bacteria;p__Firmicutes;c__Clostridia;o__Clostridiales;f__Lachnospiraceae;g__Lachnoclostridium;s__[Clostridium] citroniae	1002.733333	469.8333333	0.027639107	1.09371701	0.786117268		#N/A
k99_4412044_1	k__Bacteria; p__Firmicutes; c__Clostridia; o__Clostridiales; f__Clostridiaceae; g__Clostridium; s__Clostridium sp. C105KSO14	241.4516398	113.1199635	0.03774565	1.093880701	0.317746142	Modulator of FtsH protease HflK	#N/A
k99_9001192_1	k__Bacteria; p__Firmicutes; c__Clostridia; o__Clostridiales; f__Lachnospiraceae; g__Roseburia; s__Roseburia sp. UNK.MGS-15	162.8532238	75.96421334	0.048966826	1.100180448	0.336284627	Uncharacterized protein	#N/A
k99_6630892_1	k__Bacteria; p__Firmicutes; c__Clostridia; o__Clostridiales; f__Lachnospiraceae; g__Blautia; s__Blautia wexlerae	198.38802	91.35711534	0.026278557	1.118735906	0.28928311	Glucose-1-phosphate adenylyltransferase GlgD1 (EC 2.7.7.27)	#N/A
A0A087WWU8	Human	132.7994495	60.84157864	0.004397146	1.126119674	0.261910925	Tropomyosin alpha-3 chain	#N/A
k99_3235537_1	k__Bacteria; p__Firmicutes; c__Clostridia; o__Clostridiales; f__Lachnospiraceae; g__Coprococcus; s__Coprococcus sp. HPP0074	192.9037321	88.24782837	0.007758221	1.128248374	0.261910925	50S ribosomal protein L19	#N/A
k99_3819403_1	k__Bacteria; p__Firmicutes; c__Clostridia; o__Clostridiales; f__Lachnospiraceae; g__Blautia; s__Blautia obeum	219.4004437	99.11820895	0.022174005	1.14634442	0.276092894	Glutamine--tRNA ligase (EC 6.1.1.18)	#N/A
G001404455	k__Bacteria;p__Firmicutes;c__Clostridia;o__Clostridiales;f__Lachnospiraceae;g__Blautia;s__Blautia obeum	22527.66667	10162.79167	0.039482431	1.148401135	0.786117268		#N/A
k99_882408_9	k__Bacteria; p__Proteobacteria; c__Gammaproteobacteria; o__Enterobacterales; f__Enterobacteriaceae; g__Citrobacter; s__Citrobacter amalonaticus	161.3271866	72.77026807	0.015272377	1.148568549	0.261910925	Triosephosphate isomerase (TIM) (TPI) (EC 5.3.1.1) (Triose-phosphate isomerase)	#N/A
k99_1062973_1	k__Bacteria; p__Firmicutes; c__Clostridia; o__Clostridiales; f__Lachnospiraceae; g__Blautia; s__[Ruminococcus] gnavus	249.8569551	112.5243073	0.017658573	1.150865694	0.263672076	ABC transporter, ATP-binding protein	#N/A
k99_5545453_1	k__Bacteria; p__Bacteroidetes; c__Bacteroidia; o__; f__; g__; s__Bacteroidia bacterium UC5.1-2G11	212.52987	95.4190904	0.030251537	1.15531578	0.300468275	TonB-dependent receptor plug domain protein	#N/A
k99_282362_1	k__Bacteria; p__Firmicutes; c__Clostridia; o__Clostridiales; f__Lachnospiraceae; g__Blautia; s__Blautia sp. CAG:237	165.8804064	74.3902315	0.01097614	1.156958395	0.261910925	60 kDa chaperonin (GroEL protein) (Protein Cpn60)	#N/A
P12883	Human	202.2782568	90.58664299	0.033143621	1.158971005	0.307523617	Myosin-7 (Myosin heavy chain 7) (Myosin heavy chain slow isoform) (MyHC-slow) (Myosin heavy chain, cardiac muscle beta isoform) (MyHC-beta)	#N/A
k99_2070961_1	k__Bacteria; p__Bacteroidetes; c__Bacteroidia; o__Bacteroidales; f__Bacteroidaceae; g__Bacteroides; s__Bacteroides caccae	216.1712135	96.72667305	0.010064446	1.160188736	0.261910925	OmpA family protein	#N/A
k99_333104_1	k__Bacteria; p__Bacteroidetes; c__Bacteroidia; o__Bacteroidales; f__Bacteroidaceae; g__Bacteroides; s__Bacteroides ovatus	188.5217336	83.87382158	0.014064149	1.168438357	0.261910925	2-oxoglutarate synthase subunit korA	#N/A
k99_76066_1	k__Bacteria; p__Firmicutes; c__Clostridia; o__Clostridiales; f__Lachnospiraceae; g__Blautia; s__Blautia sp. CAG:237	183.7532742	81.65416777	0.007022318	1.170171526	0.261910925	Lipoyl-binding domain-containing protein	#N/A
k99_4251227_2	k__Bacteria; p__Firmicutes; c__Clostridia; o__Clostridiales; f__Lachnospiraceae; g__Coprococcus; s__Coprococcus sp. HPP0048	267.4568169	117.0359479	0.021086895	1.19235425	0.276069074	Deleted.	#N/A
G000332875	k__Bacteria;p__Firmicutes;c__Clostridia;o__Clostridiales;f__Lachnospiraceae;g__Anaerostipes;s__Anaerostipes hadrus	10690.3	4674.791667	0.047031421	1.193328362	0.786117268		#N/A
k99_5281383_1	k__Bacteria; p__Firmicutes; c__Clostridia; o__Clostridiales; f__; g__; s__Clostridiales bacterium VE202-28	215.6518515	94.22082404	0.004073091	1.194586247	0.261910925	Chaperone protein DnaK (HSP70) (Heat shock 70 kDa protein) (Heat shock protein 70)	#N/A
k99_2633115_1	k__Bacteria; p__Bacteroidetes; c__Bacteroidia; o__Bacteroidales; f__Bacteroidaceae; g__Bacteroides; s__Bacteroides uniformis	204.8866138	88.58478443	0.02749023	1.209694905	0.295240598	TonB-linked outer membrane protein, SusC/RagA family	#N/A
A0A0A0MTS7	Human	181.9224907	78.14796885	0.000350091	1.21904363	0.260945546	Titin	#N/A
k99_10117924_1	k__Bacteria; p__Firmicutes; c__Clostridia; o__Clostridiales; f__Lachnospiraceae; g__Blautia; s__Blautia wexlerae	208.2320015	89.37425737	0.010042579	1.220260548	0.261910925	Deleted.	#N/A
P13535	Human	139.5593223	59.89910716	0.000828883	1.220272093	0.261910925	Myosin-8 (Myosin heavy chain 8) (Myosin heavy chain, skeletal muscle, perinatal) (MyHC-perinatal)	#N/A
MTB_feature_437	Dihydroxy bile acids, alcohols and derivatives	1301420.66	558393.7031	0.000748933	1.220732785	0.105867909		(R)-4-((3S,5S,8R,9S,10S,12S,13R,14S,17R)-3,12-dihydroxy-10,13-dimethylhexadecahydro-1H-cyclopenta[a]phenanthren-17-yl)pentanoic acid
k99_3327872_1	k__Bacteria; p__Proteobacteria; c__Gammaproteobacteria; o__Enterobacterales; f__Enterobacteriaceae; g__Enterobacter; s__Enterobacter hormaechei	191.2231867	81.95923144	0.009089911	1.222279107	0.261910925	CTP synthase (EC 6.3.4.2) (UTP--ammonia ligase)	#N/A
k99_2676725_1	k__Bacteria; p__Firmicutes; c__Clostridia; o__Clostridiales; f__Peptostreptococcaceae; g__Intestinibacter; s__Intestinibacter bartlettii	191.2534756	81.50685793	0.042012022	1.230492609	0.333109424	Corrinoid iron sulfur protein subunit alpha (EC 2.1.1.245)	#N/A
k99_6031691_2	k__Bacteria; p__Firmicutes; c__Clostridia; o__Clostridiales; f__Lachnospiraceae; g__; s__Lachnospiraceae bacterium 6_1_37FAA	228.8838939	97.52828182	0.008622686	1.230723401	0.261910925	Pyruvate, phosphate dikinase (EC 2.7.9.1) (Pyruvate, orthophosphate dikinase)	#N/A
k99_2502672_1	k__Bacteria; p__Firmicutes; c__Clostridia; o__Clostridiales; f__Lachnospiraceae; g__Blautia; s__Blautia wexlerae	189.02806	80.38002152	0.045030546	1.233691541	0.333109424	Uncharacterized protein	#N/A
k99_9875946_1	k__Bacteria; p__Bacteroidetes; c__Bacteroidia; o__Bacteroidales; f__Bacteroidaceae; g__Bacteroides; s__Bacteroides dorei	201.4910746	84.87281703	0.022918953	1.247341466	0.277760892	TonB-linked outer membrane, SusC/RagA family protein (Fragment)	#N/A
k99_1794978_1	k__Bacteria; p__Firmicutes; c__Clostridia; o__Clostridiales; f__Clostridiaceae; g__Clostridium; s__Clostridium sp. AT5	330.684165	138.6531959	0.047610895	1.253973092	0.334214427	Putative endo-beta-N-acetylglucosaminidase (EC 3.2.1.96)	#N/A
k99_4594030_4	k__Bacteria; p__Firmicutes; c__Clostridia; o__Clostridiales; f__Lachnospiraceae; g__Blautia; s__Blautia sp. CAG:257	159.9408915	66.79197101	0.006950708	1.259792241	0.261910925	Aldehyde-alcohol dehydrogenase	#N/A
k99_7776274_1	k__Bacteria; p__Bacteroidetes; c__Bacteroidia; o__Bacteroidales; f__Bacteroidaceae; g__Bacteroides; s__Bacteroides vulgatus	231.7624924	96.36353409	0.03310336	1.266087895	0.307523617	TonB-dependent receptor plug domain protein	#N/A
k99_99398_1	k__Bacteria; p__Firmicutes; c__Clostridia; o__Clostridiales; f__Peptostreptococcaceae; g__Intestinibacter; s__Intestinibacter bartlettii	219.3204633	91.02692249	0.013395312	1.268675215	0.261910925	Glutamate dehydrogenase	#N/A
k99_5635022_1	k__Bacteria; p__Bacteroidetes; c__Bacteroidia; o__Bacteroidales; f__Bacteroidaceae; g__Bacteroides; s__Bacteroides vulgatus	213.8686007	87.13593058	0.033173441	1.295385044	0.307523617	Deleted.	#N/A
k99_4607745_1	k__Bacteria; p__Firmicutes; c__Clostridia; o__Clostridiales; f__Lachnospiraceae; g__Blautia; s__Blautia producta	211.3896385	86.03002563	0.012372056	1.29699249	0.261910925	L-lactate dehydrogenase (L-LDH) (EC 1.1.1.27)	#N/A
P12882	Human	181.042611	72.61184028	0.013245304	1.318052574	0.261910925	Myosin-1 (Myosin heavy chain 1) (Myosin heavy chain 2x) (MyHC-2x) (Myosin heavy chain IIx/d) (MyHC-IIx/d) (Myosin heavy chain, skeletal muscle, adult 1)	#N/A
k99_1266742_2	k__Bacteria; p__Firmicutes; c__Clostridia; o__Clostridiales; f__; g__; s__Clostridiales bacterium VE202-27	223.757568	89.1356335	0.003390563	1.327862284	0.261910925	67 kDa myosin-cross-reactive antigen family protein	#N/A
MTB_feature_647	unclassified	228601.007	90422.65298	0.006017444	1.338075607	0.118092343		missing
k99_1016067_1	k__Bacteria; p__Firmicutes; c__Clostridia; o__Clostridiales; f__Lachnospiraceae; g__Coprococcus; s__Coprococcus sp. HPP0048	247.1734882	97.5415711	0.037474701	1.341434893	0.317746142	Glycine reductase complex component B gammasubunit (Selenocysteine) (EC 1.21.4.2)	#N/A
k99_4169281_1	k__Bacteria; p__Firmicutes; c__Clostridia; o__Clostridiales; f__Lachnospiraceae; g__Blautia; s__Blautia sp. Marseille-P2398	229.3497767	89.81190713	0.017240168	1.35257087	0.261910925	Uncharacterized protein	#N/A
G000159435	k__Bacteria;p__Firmicutes;c__Bacilli;o__Lactobacillales;f__Lactobacillaceae;g__Lactobacillus;s__Lactobacillus vaginalis	52.2	20.375	0.036547662	1.357249747	0.786117268		#N/A
MTB_feature_449	Dihydroxy bile acids, alcohols and derivatives	658257.4809	256768.9051	0.038213034	1.358181511	0.271873173		(R)-4-((3S,5S,7S,8R,9S,10S,13R,14S,17R)-3,7-dihydroxy-10,13-dimethylhexadecahydro-1H-cyclopenta[a]phenanthren-17-yl)pentanoic acid
k99_4331885_1	k__Bacteria; p__Bacteroidetes; c__Bacteroidia; o__Bacteroidales; f__Bacteroidaceae; g__Bacteroides; s__Bacteroides dorei	311.1672023	121.19286	0.022775823	1.3603853	0.277298269	Biopolymer transport protein	#N/A
k99_2170438_2	k__Bacteria; p__Firmicutes; c__Clostridia; o__Clostridiales; f__Lachnospiraceae; g__Blautia; s__Blautia sp. CAG:257	240.6892959	93.04667432	0.008938225	1.371145491	0.261910925	Elongation factor Tu (EF-Tu) (P-40)	#N/A
A0A0S2Z4G6	Human	204.9079949	78.07491636	0.029042528	1.392045251	0.298735044	Tropomyosin 1 (Alpha), isoform CRA_o (Tropomyosin 1 isoform 2) (Tropomyosin alpha-1 chain) (Fragment)	#N/A
k99_2943641_1	k__Bacteria; p__Proteobacteria; c__Gammaproteobacteria; o__Enterobacterales; f__Enterobacteriaceae; g__Klebsiella; s__Klebsiella pneumoniae	194.3482855	73.00148343	0.042061848	1.412646695	0.333109424	Pyruvate formate-lyase (EC 2.3.1.54)	#N/A
k99_815190_1	k__Bacteria; p__Firmicutes; c__Clostridia; o__Clostridiales; f__Peptostreptococcaceae; g__Intestinibacter; s__Intestinibacter bartlettii	256.0374337	95.24068721	0.044334506	1.426704818	0.333109424	Deleted.	#N/A
k99_6737725_1	k__Bacteria; p__Firmicutes; c__; o__; f__; g__; s__Firmicutes bacterium CAG:646	275.2521606	101.7274986	0.031630586	1.436044172	0.302054558	L-fucose isomerase (FucIase) (EC 5.3.1.25) (6-deoxy-L-galactose isomerase)	#N/A
G000420905	k__Bacteria;p__Firmicutes;c__Clostridia;o__Clostridiales;f__Lachnospiraceae;g__Butyrivibrio;s__Butyrivibrio sp. AD3002	40.83333333	14.875	0.001446665	1.456857675	0.786117268		#N/A
A7E2Y1	Human	204.4783616	74.04774688	0.011240353	1.465420438	0.261910925	Myosin-7B (Antigen MLAA-21) (Myosin cardiac muscle beta chain) (Myosin heavy chain 7B, cardiac muscle beta isoform) (Slow A MYH14)	#N/A
k99_3736726_2	k__Bacteria; p__Firmicutes; c__Clostridia; o__Clostridiales; f__Lachnospiraceae; g__Lachnoclostridium; s__[Clostridium] symbiosum	269.7499548	95.77790831	0.016778813	1.493857884	0.261910925	Pyruvate:ferredoxin oxidoreductase (EC 1.2.7.1) (Pyruvate synthase)	#N/A
G000979995	k__Archaea;p__Euryarchaeota;c__Methanomicrobia;o__Methanosarcinales;f__Methanosarcinaceae;g__Methanosarcina;s__Methanosarcina mazei	44.3	15.20833333	0.037980851	1.542444641	0.786117268		#N/A
k99_5537419_2	k__Bacteria; p__Firmicutes; c__Clostridia; o__Clostridiales; f__Lachnospiraceae; g__Blautia; s__Blautia sp. CAG:257	198.8386366	67.65677141	0.037884192	1.555291878	0.317746142	60 kDa chaperonin (GroEL protein) (Protein Cpn60)	#N/A
Q9UKX2	Human	181.9547434	61.30760277	0.004314649	1.569441763	0.261910925	Myosin-2 (Myosin heavy chain 2) (Myosin heavy chain 2a) (MyHC-2a) (Myosin heavy chain IIa) (MyHC-IIa) (Myosin heavy chain, skeletal muscle, adult 2)	#N/A
k99_1684771_6	k__Bacteria; p__Firmicutes; c__Clostridia; o__Clostridiales; f__Lachnospiraceae; g__Blautia; s__Blautia obeum	251.4624021	84.48976529	0.001467744	1.573494213	0.261910925	Uncharacterized protein	#N/A
Q9UKX3	Human	195.3201391	65.08254408	0.015650055	1.585498159	0.261910925	Myosin-13 (Myosin heavy chain 13) (Myosin heavy chain, skeletal muscle, extraocular) (MyHC-EO) (Myosin heavy chain, skeletal muscle, laryngeal) (MyHC-IIL) (Superfast myosin)	#N/A
G000171615	k__Bacteria;p__Firmicutes;c__Bacilli;o__Bacillales;f__Bacillaceae;g__Bacillus;s__Bacillus coahuilensis	69.96666667	23.29166667	0.024920078	1.586853884	0.786117268		#N/A
k99_1398031_2	k__Bacteria; p__Firmicutes; c__Clostridia; o__; f__; g__; s__Clostridia bacterium UC5.1-2H6	208.6416137	69.39222529	0.019392681	1.588180995	0.268248501	Formate C-acetyltransferase (EC 2.3.1.54)	#N/A
k99_4366458_2	k__Bacteria; p__Firmicutes; c__Clostridia; o__Clostridiales; f__Clostridiaceae; g__Clostridium; s__Clostridium sp. CAG:7	301.2250813	98.66986533	0.010786638	1.610160455	0.261910925	Putative succinyl-diaminopimelate desuccinylase (EC 3.5.1.18)	#N/A
G001746855	k__Bacteria;p__Actinobacteria;c__Actinobacteria;o__Actinomycetales;f__Actinomycetaceae;g__Actinomyces;s__Actinomyces hongkongensis	9.7	3.083333333	0.043095662	1.653493882	0.786117268		#N/A
k99_5046715_1	k__Bacteria; p__Firmicutes; c__Clostridia; o__Clostridiales; f__Lachnospiraceae; g__; s__Lachnospiraceae bacterium 1_4_56FAA	254.1752591	80.41843781	0.01583324	1.660225392	0.261910925	67 kDa myosin-cross-reactive antigen family protein	#N/A
k99_2517917_1	k__Bacteria; p__Bacteroidetes; c__Bacteroidia; o__Bacteroidales; f__Bacteroidaceae; g__Bacteroides; s__Bacteroides massiliensis	253.2326123	78.83457246	0.028711192	1.683562853	0.298735044	Putative outer membrane protein probably involved in nutrient binding	#N/A
k99_9751454_1	k__Bacteria; p__Firmicutes; c__Clostridia; o__Clostridiales; f__Lachnospiraceae; g__Blautia; s__Blautia wexlerae	278.3778036	86.58376658	0.005586393	1.684875715	0.261910925	Extracellular solute-binding protein family 1	#N/A
k99_8101140_2	k__Bacteria; p__Firmicutes; c__Clostridia; o__; f__; g__; s__Clostridia bacterium UC5.1-2H6	305.0719179	94.26164449	0.049004384	1.694406629	0.336284627	Glyceraldehyde-3-phosphate dehydrogenase (EC 1.2.1.-)	#N/A
ASV_Feature_8	k__Bacteria; p__Firmicutes; c__Clostridia; o__Clostridiales; f__Lachnospiraceae; g__Blautia; s__	542366.2448	166048.7804	0.003553168	1.707660265	0.142126718	k__Bacteria; p__Firmicutes; c__Clostridia; o__Clostridiales; f__Lachnospiraceae; g__Blautia; s__	#N/A
ASV_Feature_29	k__Bacteria; p__Firmicutes; c__Clostridia; o__Clostridiales; f__Lachnospiraceae; g__Coprococcus; s__	119255.12	36167.94967	0.049404148	1.721267486	0.501367045		#N/A
k99_571802_3	k__Bacteria; p__Firmicutes; c__Clostridia; o__Clostridiales; f__Ruminococcaceae; g__Ruminococcus; s__Ruminococcus lactaris	311.7224236	92.8000843	0.041983002	1.748063917	0.333109424	Pyruvate:ferredoxin oxidoreductase (EC 1.2.7.1) (Pyruvate synthase)	#N/A
F8VZY0	Human	233.1384539	68.7066507	0.001687088	1.762665321	0.261910925	Myosin-binding protein C, slow-type	#N/A
MTB_feature_430	Trihydroxy bile acids, alcohols and derivatives	772107.0318	226700.81	0.023299209	1.768011307	0.182898787		(4R)-4-((3R,5S,7R,8R,9S,10S,13S,14S,16R)-3,7,16-trihydroxy-10,13-dimethylhexadecahydro-1H-cyclopenta[a]phenanthren-17-yl)pentanoic acid
MTB_feature_426	unclassified	2456212.237	716047.2235	0.016013181	1.778308585	0.144913333		missing
G900115855	k__Bacteria;p__Firmicutes;c__Clostridia;o__Clostridiales;f__Lachnospiraceae;g__Lachnoclostridium;s__[Clostridium] citroniae	592.4666667	170.6666667	0.007751259	1.795552678	0.786117268		#N/A
Q5TCU8	Human	220.0890846	63.16549844	0.001789301	1.80087893	0.261910925	Tropomyosin beta chain	#N/A
MTB_feature_428	Bile acids, alcohols and derivatives	1373701.835	393228.8849	0.016614267	1.804627693	0.144913333		missing
k99_7221403_1	k__Bacteria; p__Firmicutes; c__Clostridia; o__Clostridiales; f__Peptostreptococcaceae; g__Intestinibacter; s__Intestinibacter bartlettii	239.7971855	68.54690481	0.013986502	1.806651297	0.261910925	Deleted.	#N/A
k99_2259863_1	k__Bacteria; p__Firmicutes; c__Clostridia; o__Clostridiales; f__Lachnospiraceae; g__Lachnoclostridium; s__[Clostridium] bolteae	200.4167913	56.77269148	0.012654118	1.819734341	0.261910925	Enolase (EC 4.2.1.11) (2-phospho-D-glycerate hydro-lyase) (2-phosphoglycerate dehydratase)	#N/A
G000379525	k__Bacteria;p__Proteobacteria;c__Gammaproteobacteria;o__Chromatiales;f__Chromatiaceae;g__Lamprocystis;s__Lamprocystis purpurea	159.9666667	45.125	0.02482261	1.825772475	0.786117268		#N/A
G000784965	k__Bacteria;p__Proteobacteria;c__Gammaproteobacteria;o__Enterobacterales;f__Erwiniaceae;g__Pantoea;s__Pantoea sp. PSNIH2	416.9	115.5833333	0.019177295	1.85076799	0.786117268		#N/A
G000982825	k__Bacteria;p__Proteobacteria;c__Gammaproteobacteria;o__Enterobacterales;f__Enterobacteriaceae;g__Cronobacter;s__Cronobacter sakazakii	521	140.8333333	0.034816553	1.887294532	0.786117268		#N/A
k99_2786405_1	unknown	197.7012546	50.82769621	0.044959703	1.95963528	0.333109424		#N/A
O14983	Human	234.0827358	58.72822932	0.00384067	1.99489249	0.261910925	Sarcoplasmic/endoplasmic reticulum calcium ATPase 1 (SERCA1) (SR Ca(2+)-ATPase 1) (EC 7.2.2.10) (Calcium pump 1) (Calcium-transporting ATPase sarcoplasmic reticulum type, fast twitch skeletal muscle isoform) (Endoplasmic reticulum class 1/2 Ca(2+) ATPase)	#N/A
G001558935	k__Bacteria;p__Proteobacteria;c__Gammaproteobacteria;o__Enterobacterales;f__Enterobacteriaceae;g__Citrobacter;s__Citrobacter amalonaticus	1693.9	384.5833333	0.048522335	2.13898056	0.786117268		#N/A
G000220835	k__Bacteria;p__Actinobacteria;c__Actinobacteria;o__Actinomycetales;f__Actinomycetaceae;g__Actinomyces;s__Actinomyces sp. oral taxon 448	63.16666667	14.25	0.027240172	2.148201523	0.786117268		#N/A
G001305055	k__Bacteria;p__Firmicutes;c__Clostridia;o__;f__;g__;s__Clostridia bacterium UC5.1-1C12	44.7	8.666666667	0.029089747	2.366725709	0.786117268		#N/A
G001874625	k__Bacteria;p__Proteobacteria;c__Gammaproteobacteria;o__Enterobacterales;f__Morganellaceae;g__Providencia;s__Providencia rettgeri	66.2	10.875	0.023407791	2.605815816	0.786117268		#N/A
G000411355	k__Bacteria;p__Firmicutes;c__Clostridia;o__Clostridiales;f__Lachnospiraceae;g__Coprococcus;s__Coprococcus sp. HPP0048	9710.333333	1551.5	0.014229607	2.645857124	0.786117268		#N/A
G000621425	k__Bacteria;p__Firmicutes;c__Clostridia;o__Clostridiales;f__Lachnospiraceae;g__;s__Lachnospiraceae bacterium AB2028	13.36666667	1.916666667	0.03053965	2.801968376	0.786117268		#N/A
ASV_Feature_331	k__Bacteria; p__Firmicutes; c__Clostridia; o__Clostridiales; f__Lachnospiraceae; g__Clostridium	98836.69512	7602.612472	0.045399179	3.700479611	0.501367045		#N/A
G000240185	k__Bacteria;p__Proteobacteria;c__Gammaproteobacteria;o__Enterobacterales;f__Enterobacteriaceae;g__Klebsiella;s__Klebsiella pneumoniae;t__Klebsiella pneumoniae subsp. pneumoniae	28577.5	857.0416667	0.040016338	5.059370557	0.786117268		#N/A
