# Supplementary material for: Location-specific signatures of Crohn’s disease at a multi-omics scale
Source: Microbiome. 2022 Aug 24;10:133. doi: 10.1186/s40168-022-01331-x (PMC9400277; doi:10.1186/s40168-022-01331-x)
Supplement: Supplementary file 11 — Additional file 10. [file 40168_2022_1331_MOESM10_ESM.csv]

Metabolite Family	Taxa	cor	p	FDR	Blank%_in_samples
Glycinated bile acids and derivatives	k__Bacteria;p__Proteobacteria;c__Alphaproteobacteria;o__Rhizobiales;f__Phyllobacteriaceae;g__Mesorhizobium;s__Mesorhizobium plurifarium	1	0	0	0.96
Glycinated bile acids and derivatives	k__Bacteria;p__Proteobacteria;c__Alphaproteobacteria;o__Rhodobacterales;f__Rhodobacteraceae;g__Thalassobacter;s__Thalassobacter stenotrophicus	1	0	0	0.96
unclassified	k__Bacteria;p__Proteobacteria;c__Gammaproteobacteria;o__Thiotrichales;f__Francisellaceae;g__Francisella;s__Francisella tularensis;t__Francisella tularensis subsp. holarctica	1	0	0	0.92
unclassified	k__Bacteria;p__Proteobacteria;c__Gammaproteobacteria;o__Thiotrichales;f__Francisellaceae;g__Francisella;s__Francisella sp. W12-1067	1	0	0	0.92
unclassified	k__Bacteria;p__Proteobacteria;c__Gammaproteobacteria;o__Thiotrichales;f__Francisellaceae;g__Francisella;s__Francisella tularensis;t__Francisella tularensis subsp. holarctica	1	0	0	0.92
unclassified	k__Bacteria;p__Proteobacteria;c__Gammaproteobacteria;o__Thiotrichales;f__Francisellaceae;g__Francisella;s__Francisella sp. W12-1067	1	0	0	0.92
Glycinated bile acids and derivatives	k__Bacteria;p__Proteobacteria;c__Alphaproteobacteria;o__Rhizobiales;f__Phyllobacteriaceae;g__Mesorhizobium;s__Mesorhizobium plurifarium	1	0	0	0.96
Glycinated bile acids and derivatives	k__Bacteria;p__Proteobacteria;c__Alphaproteobacteria;o__Rhodobacterales;f__Rhodobacteraceae;g__Thalassobacter;s__Thalassobacter stenotrophicus	1	0	0	0.96
#N/A	k__Bacteria;p__Proteobacteria;c__Gammaproteobacteria;o__Thiotrichales;f__Francisellaceae;g__Francisella;s__Francisella tularensis;t__Francisella tularensis subsp. holarctica	1	0	0	0.92
#N/A	k__Bacteria;p__Proteobacteria;c__Gammaproteobacteria;o__Thiotrichales;f__Francisellaceae;g__Francisella;s__Francisella sp. W12-1067	1	0	0	0.92
unclassified	k__Bacteria;p__Proteobacteria;c__Alphaproteobacteria;o__Rhizobiales;f__Phyllobacteriaceae;g__Mesorhizobium;s__Mesorhizobium plurifarium	1	0	0	0.96
unclassified	k__Bacteria;p__Proteobacteria;c__Alphaproteobacteria;o__Rhodobacterales;f__Rhodobacteraceae;g__Thalassobacter;s__Thalassobacter stenotrophicus	1	0	0	0.96
unclassified	k__Bacteria;p__Proteobacteria;c__Gammaproteobacteria;o__Thiotrichales;f__Francisellaceae;g__Francisella;s__Francisella tularensis;t__Francisella tularensis subsp. holarctica	1	0	0	0.92
unclassified	k__Bacteria;p__Proteobacteria;c__Gammaproteobacteria;o__Thiotrichales;f__Francisellaceae;g__Francisella;s__Francisella sp. W12-1067	1	0	0	0.92
Glycinated bile acids and derivatives	k__Bacteria;p__Proteobacteria;c__Alphaproteobacteria;o__Rhizobiales;f__Phyllobacteriaceae;g__Mesorhizobium;s__Mesorhizobium plurifarium	1	0	0	0.96
Glycinated bile acids and derivatives	k__Bacteria;p__Proteobacteria;c__Alphaproteobacteria;o__Rhodobacterales;f__Rhodobacteraceae;g__Thalassobacter;s__Thalassobacter stenotrophicus	1	0	0	0.96
Glycinated bile acids and derivatives	k__Bacteria;p__Proteobacteria;c__Alphaproteobacteria;o__Rhizobiales;f__Phyllobacteriaceae;g__Mesorhizobium;s__Mesorhizobium plurifarium	1	0	0	0.96
Glycinated bile acids and derivatives	k__Bacteria;p__Proteobacteria;c__Alphaproteobacteria;o__Rhodobacterales;f__Rhodobacteraceae;g__Thalassobacter;s__Thalassobacter stenotrophicus	1	0	0	0.96
#N/A	k__Bacteria;p__Proteobacteria;c__Alphaproteobacteria;o__Rhizobiales;f__Phyllobacteriaceae;g__Mesorhizobium;s__Mesorhizobium plurifarium	1	0	0	0.96
#N/A	k__Bacteria;p__Proteobacteria;c__Alphaproteobacteria;o__Rhodobacterales;f__Rhodobacteraceae;g__Thalassobacter;s__Thalassobacter stenotrophicus	1	0	0	0.96
#N/A	k__Bacteria;p__Proteobacteria;c__Alphaproteobacteria;o__Rhizobiales;f__Phyllobacteriaceae;g__Mesorhizobium;s__Mesorhizobium plurifarium	1	0	0	0.96
#N/A	k__Bacteria;p__Proteobacteria;c__Alphaproteobacteria;o__Rhodobacterales;f__Rhodobacteraceae;g__Thalassobacter;s__Thalassobacter stenotrophicus	1	0	0	0.96
#N/A	k__Bacteria;p__Proteobacteria;c__Alphaproteobacteria;o__Rhizobiales;f__Phyllobacteriaceae;g__Mesorhizobium;s__Mesorhizobium plurifarium	1	0	0	0.96
#N/A	k__Bacteria;p__Proteobacteria;c__Alphaproteobacteria;o__Rhodobacterales;f__Rhodobacteraceae;g__Thalassobacter;s__Thalassobacter stenotrophicus	1	0	0	0.96
#N/A	k__Bacteria;p__Proteobacteria;c__Alphaproteobacteria;o__Rhizobiales;f__Phyllobacteriaceae;g__Mesorhizobium;s__Mesorhizobium plurifarium	1	0	0	0.96
#N/A	k__Bacteria;p__Proteobacteria;c__Alphaproteobacteria;o__Rhodobacterales;f__Rhodobacteraceae;g__Thalassobacter;s__Thalassobacter stenotrophicus	1	0	0	0.96
unclassified	k__Bacteria;p__Proteobacteria;c__Alphaproteobacteria;o__Rhizobiales;f__Phyllobacteriaceae;g__Mesorhizobium;s__Mesorhizobium plurifarium	1	0	0	0.96
unclassified	k__Bacteria;p__Proteobacteria;c__Alphaproteobacteria;o__Rhodobacterales;f__Rhodobacteraceae;g__Thalassobacter;s__Thalassobacter stenotrophicus	1	0	0	0.96
unclassified	k__Bacteria;p__Proteobacteria;c__Alphaproteobacteria;o__Rhizobiales;f__Phyllobacteriaceae;g__Mesorhizobium;s__Mesorhizobium plurifarium	1	0	0	0.96
unclassified	k__Bacteria;p__Proteobacteria;c__Alphaproteobacteria;o__Rhodobacterales;f__Rhodobacteraceae;g__Thalassobacter;s__Thalassobacter stenotrophicus	1	0	0	0.96
Glycinated bile acids and derivatives	k__Bacteria;p__Proteobacteria;c__Gammaproteobacteria;o__Thiotrichales;f__Francisellaceae;g__Francisella;s__Francisella tularensis;t__Francisella tularensis subsp. holarctica	0.833554454	2.29E-07	8.31E-05	0.88
Glycinated bile acids and derivatives	k__Bacteria;p__Proteobacteria;c__Gammaproteobacteria;o__Thiotrichales;f__Francisellaceae;g__Francisella;s__Francisella sp. W12-1067	0.833554454	2.29E-07	8.31E-05	0.88
Glycinated bile acids and derivatives	k__Bacteria;p__Proteobacteria;c__Gammaproteobacteria;o__Thiotrichales;f__Francisellaceae;g__Francisella;s__Francisella tularensis;t__Francisella tularensis subsp. holarctica	0.833554454	2.29E-07	8.31E-05	0.88
Glycinated bile acids and derivatives	k__Bacteria;p__Proteobacteria;c__Gammaproteobacteria;o__Thiotrichales;f__Francisellaceae;g__Francisella;s__Francisella sp. W12-1067	0.833554454	2.29E-07	8.31E-05	0.88
#N/A	k__Bacteria;p__Proteobacteria;c__Gammaproteobacteria;o__Thiotrichales;f__Francisellaceae;g__Francisella;s__Francisella tularensis;t__Francisella tularensis subsp. holarctica	0.833554454	2.29E-07	8.31E-05	0.88
#N/A	k__Bacteria;p__Proteobacteria;c__Gammaproteobacteria;o__Thiotrichales;f__Francisellaceae;g__Francisella;s__Francisella sp. W12-1067	0.833554454	2.29E-07	8.31E-05	0.88
#N/A	k__Bacteria;p__Proteobacteria;c__Deltaproteobacteria;o__Myxococcales;f__Polyangiaceae;g__Chondromyces;s__Chondromyces apiculatus	0.830660168	2.76E-07	9.56E-05	0.88
unclassified	k__Bacteria;p__Proteobacteria;c__Gammaproteobacteria;o__Thiotrichales;f__Francisellaceae;g__Francisella;s__Francisella tularensis;t__Francisella tularensis subsp. holarctica	0.798823018	1.69E-06	0.000533737	0.88
unclassified	k__Bacteria;p__Proteobacteria;c__Gammaproteobacteria;o__Thiotrichales;f__Francisellaceae;g__Francisella;s__Francisella sp. W12-1067	0.798823018	1.69E-06	0.000533737	0.88
#N/A	k__Bacteria;p__Proteobacteria;c__Betaproteobacteria;o__Neisseriales;f__Neisseriaceae;g__Neisseria;s__Neisseria lactamica	0.798823018	1.69E-06	0.000533737	0.92
#N/A	k__Bacteria;p__Proteobacteria;c__Betaproteobacteria;o__Neisseriales;f__Neisseriaceae;g__Kingella;s__Kingella denitrificans	0.798823018	1.69E-06	0.000533737	0.92
Trihydroxy bile acids, alcohols and derivatives	k__Bacteria;p__Proteobacteria;c__Gammaproteobacteria;o__Thiotrichales;f__Francisellaceae;g__Francisella;s__Francisella tularensis;t__Francisella tularensis subsp. holarctica	0.793034446	2.27E-06	0.000691313	0.88
Trihydroxy bile acids, alcohols and derivatives	k__Bacteria;p__Proteobacteria;c__Gammaproteobacteria;o__Thiotrichales;f__Francisellaceae;g__Francisella;s__Francisella sp. W12-1067	0.793034446	2.27E-06	0.000691313	0.88
#N/A	k__Bacteria;p__Proteobacteria;c__Gammaproteobacteria;o__Thiotrichales;f__Francisellaceae;g__Francisella;s__Francisella tularensis;t__Francisella tularensis subsp. holarctica	0.793034446	2.27E-06	0.000691313	0.88
#N/A	k__Bacteria;p__Proteobacteria;c__Gammaproteobacteria;o__Thiotrichales;f__Francisellaceae;g__Francisella;s__Francisella sp. W12-1067	0.793034446	2.27E-06	0.000691313	0.88
unclassified	k__Bacteria;p__Proteobacteria;c__Betaproteobacteria;o__Burkholderiales;f__Comamonadaceae;g__Ottowia;s__Ottowia thiooxydans	0.7829194	3.73E-06	0.001109408	0.68
#N/A	k__Bacteria;p__Proteobacteria;c__Gammaproteobacteria;o__Thiotrichales;f__Francisellaceae;g__Francisella;s__Francisella tularensis;t__Francisella tularensis subsp. holarctica	0.761197297	9.94E-06	0.002744869	0.88
#N/A	k__Bacteria;p__Proteobacteria;c__Gammaproteobacteria;o__Thiotrichales;f__Francisellaceae;g__Francisella;s__Francisella sp. W12-1067	0.761197297	9.94E-06	0.002744869	0.88
#N/A	k__Bacteria;p__Proteobacteria;c__Gammaproteobacteria;o__Thiotrichales;f__Francisellaceae;g__Francisella;s__Francisella tularensis;t__Francisella tularensis subsp. holarctica	0.761197297	9.94E-06	0.002744869	0.88
#N/A	k__Bacteria;p__Proteobacteria;c__Gammaproteobacteria;o__Thiotrichales;f__Francisellaceae;g__Francisella;s__Francisella sp. W12-1067	0.761197297	9.94E-06	0.002744869	0.88
unclassified	k__Bacteria;p__Proteobacteria;c__Gammaproteobacteria;o__Thiotrichales;f__Francisellaceae;g__Francisella;s__Francisella tularensis;t__Francisella tularensis subsp. holarctica	0.75830301	1.12E-05	0.00302971	0.88
unclassified	k__Bacteria;p__Proteobacteria;c__Gammaproteobacteria;o__Thiotrichales;f__Francisellaceae;g__Francisella;s__Francisella sp. W12-1067	0.75830301	1.12E-05	0.00302971	0.88
unclassified	k__Bacteria;p__Proteobacteria;c__Deltaproteobacteria;o__Myxococcales;f__Polyangiaceae;g__Chondromyces;s__Chondromyces apiculatus	0.75830301	1.12E-05	0.00302971	0.88
unclassified	k__Bacteria;p__Proteobacteria;c__Betaproteobacteria;o__Burkholderiales;f__Comamonadaceae;g__Ottowia;s__Ottowia thiooxydans	0.746340688	1.84E-05	0.004770219	0.88
Long-chain fatty acids	k__Bacteria;p__Proteobacteria;c__Betaproteobacteria;o__Burkholderiales;f__Comamonadaceae;g__Ottowia;s__Ottowia thiooxydans	0.742418332	2.14E-05	0.005516727	0.8
unclassified	k__Bacteria;p__Proteobacteria;c__Gammaproteobacteria;o__Thiotrichales;f__Francisellaceae;g__Francisella;s__Francisella tularensis;t__Francisella tularensis subsp. holarctica	0.73715414	2.63E-05	0.006540484	0.84
unclassified	k__Bacteria;p__Proteobacteria;c__Gammaproteobacteria;o__Thiotrichales;f__Francisellaceae;g__Francisella;s__Francisella sp. W12-1067	0.73715414	2.63E-05	0.006540484	0.84
#N/A	k__Bacteria;p__Proteobacteria;c__Betaproteobacteria;o__Burkholderiales;f__Comamonadaceae;g__Ottowia;s__Ottowia thiooxydans	0.735616002	2.79E-05	0.006900451	0.88
Glycinated bile acids and derivatives	k__Bacteria;p__Proteobacteria;c__Gammaproteobacteria;o__Thiotrichales;f__Francisellaceae;g__Francisella;s__Francisella tularensis;t__Francisella tularensis subsp. holarctica	0.721687836	4.66E-05	0.007079548	0.96
Glycinated bile acids and derivatives	k__Bacteria;p__Proteobacteria;c__Deltaproteobacteria;o__Myxococcales;f__Polyangiaceae;g__Chondromyces;s__Chondromyces apiculatus	0.721687836	4.66E-05	0.007079548	0.96
Glycinated bile acids and derivatives	k__Bacteria;p__Proteobacteria;c__Gammaproteobacteria;o__Thiotrichales;f__Francisellaceae;g__Francisella;s__Francisella sp. W12-1067	0.721687836	4.66E-05	0.007079548	0.96
unclassified	k__Bacteria;p__Proteobacteria;c__Alphaproteobacteria;o__Rhizobiales;f__Phyllobacteriaceae;g__Mesorhizobium;s__Mesorhizobium plurifarium	0.721687836	4.66E-05	0.007079548	0.92
unclassified	k__Bacteria;p__Proteobacteria;c__Alphaproteobacteria;o__Rhodobacterales;f__Rhodobacteraceae;g__Thalassobacter;s__Thalassobacter stenotrophicus	0.721687836	4.66E-05	0.007079548	0.92
unclassified	k__Bacteria;p__Proteobacteria;c__Alphaproteobacteria;o__Rhizobiales;f__Phyllobacteriaceae;g__Mesorhizobium;s__Mesorhizobium plurifarium	0.721687836	4.66E-05	0.007079548	0.92
unclassified	k__Bacteria;p__Proteobacteria;c__Alphaproteobacteria;o__Rhodobacterales;f__Rhodobacteraceae;g__Thalassobacter;s__Thalassobacter stenotrophicus	0.721687836	4.66E-05	0.007079548	0.92
Glycinated bile acids and derivatives	k__Bacteria;p__Proteobacteria;c__Gammaproteobacteria;o__Thiotrichales;f__Francisellaceae;g__Francisella;s__Francisella tularensis;t__Francisella tularensis subsp. holarctica	0.721687836	4.66E-05	0.007079548	0.96
Glycinated bile acids and derivatives	k__Bacteria;p__Proteobacteria;c__Deltaproteobacteria;o__Myxococcales;f__Polyangiaceae;g__Chondromyces;s__Chondromyces apiculatus	0.721687836	4.66E-05	0.007079548	0.96
Glycinated bile acids and derivatives	k__Bacteria;p__Proteobacteria;c__Gammaproteobacteria;o__Thiotrichales;f__Francisellaceae;g__Francisella;s__Francisella sp. W12-1067	0.721687836	4.66E-05	0.007079548	0.96
#N/A	k__Bacteria;p__Proteobacteria;c__Alphaproteobacteria;o__Rhizobiales;f__Phyllobacteriaceae;g__Mesorhizobium;s__Mesorhizobium plurifarium	0.721687836	4.66E-05	0.007079548	0.92
#N/A	k__Bacteria;p__Proteobacteria;c__Alphaproteobacteria;o__Rhodobacterales;f__Rhodobacteraceae;g__Thalassobacter;s__Thalassobacter stenotrophicus	0.721687836	4.66E-05	0.007079548	0.92
#N/A	k__Bacteria;p__Proteobacteria;c__Alphaproteobacteria;o__Rhizobiales;f__Phyllobacteriaceae;g__Mesorhizobium;s__Mesorhizobium plurifarium	0.721687836	4.66E-05	0.007079548	0.92
#N/A	k__Bacteria;p__Proteobacteria;c__Alphaproteobacteria;o__Rhodobacterales;f__Rhodobacteraceae;g__Thalassobacter;s__Thalassobacter stenotrophicus	0.721687836	4.66E-05	0.007079548	0.92
Monohydroxy bile acids, alcohols and derivatives	k__Bacteria;p__Proteobacteria;c__Alphaproteobacteria;o__Rhizobiales;f__Phyllobacteriaceae;g__Mesorhizobium;s__Mesorhizobium plurifarium	0.721687836	4.66E-05	0.007079548	0.92
Monohydroxy bile acids, alcohols and derivatives	k__Bacteria;p__Proteobacteria;c__Alphaproteobacteria;o__Rhodobacterales;f__Rhodobacteraceae;g__Thalassobacter;s__Thalassobacter stenotrophicus	0.721687836	4.66E-05	0.007079548	0.92
unclassified	k__Bacteria;p__Proteobacteria;c__Gammaproteobacteria;o__Thiotrichales;f__Francisellaceae;g__Francisella;s__Francisella tularensis;t__Francisella tularensis subsp. holarctica	0.721687836	4.66E-05	0.007079548	0.96
unclassified	k__Bacteria;p__Proteobacteria;c__Deltaproteobacteria;o__Myxococcales;f__Polyangiaceae;g__Chondromyces;s__Chondromyces apiculatus	0.721687836	4.66E-05	0.007079548	0.96
unclassified	k__Bacteria;p__Proteobacteria;c__Gammaproteobacteria;o__Thiotrichales;f__Francisellaceae;g__Francisella;s__Francisella sp. W12-1067	0.721687836	4.66E-05	0.007079548	0.96
unclassified	k__Bacteria;p__Proteobacteria;c__Alphaproteobacteria;o__Rhizobiales;f__Phyllobacteriaceae;g__Mesorhizobium;s__Mesorhizobium plurifarium	0.721687836	4.66E-05	0.007079548	0.92
unclassified	k__Bacteria;p__Proteobacteria;c__Alphaproteobacteria;o__Rhodobacterales;f__Rhodobacteraceae;g__Thalassobacter;s__Thalassobacter stenotrophicus	0.721687836	4.66E-05	0.007079548	0.92
unclassified	k__Bacteria;p__Proteobacteria;c__Alphaproteobacteria;o__Rhizobiales;f__Phyllobacteriaceae;g__Mesorhizobium;s__Mesorhizobium plurifarium	0.721687836	4.66E-05	0.007079548	0.92
unclassified	k__Bacteria;p__Proteobacteria;c__Alphaproteobacteria;o__Rhodobacterales;f__Rhodobacteraceae;g__Thalassobacter;s__Thalassobacter stenotrophicus	0.721687836	4.66E-05	0.007079548	0.92
Glycinated bile acids and derivatives	k__Bacteria;p__Proteobacteria;c__Gammaproteobacteria;o__Thiotrichales;f__Francisellaceae;g__Francisella;s__Francisella tularensis;t__Francisella tularensis subsp. holarctica	0.721687836	4.66E-05	0.007079548	0.96
Glycinated bile acids and derivatives	k__Bacteria;p__Proteobacteria;c__Deltaproteobacteria;o__Myxococcales;f__Polyangiaceae;g__Chondromyces;s__Chondromyces apiculatus	0.721687836	4.66E-05	0.007079548	0.96
Glycinated bile acids and derivatives	k__Bacteria;p__Proteobacteria;c__Gammaproteobacteria;o__Thiotrichales;f__Francisellaceae;g__Francisella;s__Francisella sp. W12-1067	0.721687836	4.66E-05	0.007079548	0.96
Glycinated bile acids and derivatives	k__Bacteria;p__Proteobacteria;c__Gammaproteobacteria;o__Thiotrichales;f__Francisellaceae;g__Francisella;s__Francisella tularensis;t__Francisella tularensis subsp. holarctica	0.721687836	4.66E-05	0.007079548	0.96
Glycinated bile acids and derivatives	k__Bacteria;p__Proteobacteria;c__Deltaproteobacteria;o__Myxococcales;f__Polyangiaceae;g__Chondromyces;s__Chondromyces apiculatus	0.721687836	4.66E-05	0.007079548	0.96
Glycinated bile acids and derivatives	k__Bacteria;p__Proteobacteria;c__Gammaproteobacteria;o__Thiotrichales;f__Francisellaceae;g__Francisella;s__Francisella sp. W12-1067	0.721687836	4.66E-05	0.007079548	0.96
#N/A	k__Bacteria;p__Proteobacteria;c__Gammaproteobacteria;o__Thiotrichales;f__Francisellaceae;g__Francisella;s__Francisella tularensis;t__Francisella tularensis subsp. holarctica	0.721687836	4.66E-05	0.007079548	0.96
#N/A	k__Bacteria;p__Proteobacteria;c__Deltaproteobacteria;o__Myxococcales;f__Polyangiaceae;g__Chondromyces;s__Chondromyces apiculatus	0.721687836	4.66E-05	0.007079548	0.96
#N/A	k__Bacteria;p__Proteobacteria;c__Gammaproteobacteria;o__Thiotrichales;f__Francisellaceae;g__Francisella;s__Francisella sp. W12-1067	0.721687836	4.66E-05	0.007079548	0.96
#N/A	k__Bacteria;p__Proteobacteria;c__Gammaproteobacteria;o__Thiotrichales;f__Francisellaceae;g__Francisella;s__Francisella tularensis;t__Francisella tularensis subsp. holarctica	0.721687836	4.66E-05	0.007079548	0.96
#N/A	k__Bacteria;p__Proteobacteria;c__Deltaproteobacteria;o__Myxococcales;f__Polyangiaceae;g__Chondromyces;s__Chondromyces apiculatus	0.721687836	4.66E-05	0.007079548	0.96
#N/A	k__Bacteria;p__Proteobacteria;c__Gammaproteobacteria;o__Thiotrichales;f__Francisellaceae;g__Francisella;s__Francisella sp. W12-1067	0.721687836	4.66E-05	0.007079548	0.96
#N/A	k__Bacteria;p__Proteobacteria;c__Gammaproteobacteria;o__Thiotrichales;f__Francisellaceae;g__Francisella;s__Francisella tularensis;t__Francisella tularensis subsp. holarctica	0.721687836	4.66E-05	0.007079548	0.96
#N/A	k__Bacteria;p__Proteobacteria;c__Deltaproteobacteria;o__Myxococcales;f__Polyangiaceae;g__Chondromyces;s__Chondromyces apiculatus	0.721687836	4.66E-05	0.007079548	0.96
#N/A	k__Bacteria;p__Proteobacteria;c__Gammaproteobacteria;o__Thiotrichales;f__Francisellaceae;g__Francisella;s__Francisella sp. W12-1067	0.721687836	4.66E-05	0.007079548	0.96
#N/A	k__Bacteria;p__Proteobacteria;c__Gammaproteobacteria;o__Thiotrichales;f__Francisellaceae;g__Francisella;s__Francisella tularensis;t__Francisella tularensis subsp. holarctica	0.721687836	4.66E-05	0.007079548	0.96
#N/A	k__Bacteria;p__Proteobacteria;c__Deltaproteobacteria;o__Myxococcales;f__Polyangiaceae;g__Chondromyces;s__Chondromyces apiculatus	0.721687836	4.66E-05	0.007079548	0.96
#N/A	k__Bacteria;p__Proteobacteria;c__Gammaproteobacteria;o__Thiotrichales;f__Francisellaceae;g__Francisella;s__Francisella sp. W12-1067	0.721687836	4.66E-05	0.007079548	0.96
unclassified	k__Bacteria;p__Proteobacteria;c__Alphaproteobacteria;o__Rhizobiales;f__Phyllobacteriaceae;g__Mesorhizobium;s__Mesorhizobium plurifarium	0.721687836	4.66E-05	0.007079548	0.92
unclassified	k__Bacteria;p__Proteobacteria;c__Alphaproteobacteria;o__Rhodobacterales;f__Rhodobacteraceae;g__Thalassobacter;s__Thalassobacter stenotrophicus	0.721687836	4.66E-05	0.007079548	0.92
unclassified	k__Bacteria;p__Proteobacteria;c__Alphaproteobacteria;o__Rhizobiales;f__Phyllobacteriaceae;g__Mesorhizobium;s__Mesorhizobium plurifarium	0.721687836	4.66E-05	0.007079548	0.92
unclassified	k__Bacteria;p__Proteobacteria;c__Alphaproteobacteria;o__Rhodobacterales;f__Rhodobacteraceae;g__Thalassobacter;s__Thalassobacter stenotrophicus	0.721687836	4.66E-05	0.007079548	0.92
unclassified	k__Bacteria;p__Proteobacteria;c__Alphaproteobacteria;o__Rhizobiales;f__Phyllobacteriaceae;g__Mesorhizobium;s__Mesorhizobium plurifarium	0.721687836	4.66E-05	0.007079548	0.92
unclassified	k__Bacteria;p__Proteobacteria;c__Alphaproteobacteria;o__Rhodobacterales;f__Rhodobacteraceae;g__Thalassobacter;s__Thalassobacter stenotrophicus	0.721687836	4.66E-05	0.007079548	0.92
unclassified	k__Bacteria;p__Proteobacteria;c__Gammaproteobacteria;o__Thiotrichales;f__Francisellaceae;g__Francisella;s__Francisella tularensis;t__Francisella tularensis subsp. holarctica	0.721687836	4.66E-05	0.007079548	0.96
unclassified	k__Bacteria;p__Proteobacteria;c__Deltaproteobacteria;o__Myxococcales;f__Polyangiaceae;g__Chondromyces;s__Chondromyces apiculatus	0.721687836	4.66E-05	0.007079548	0.96
unclassified	k__Bacteria;p__Proteobacteria;c__Gammaproteobacteria;o__Thiotrichales;f__Francisellaceae;g__Francisella;s__Francisella sp. W12-1067	0.721687836	4.66E-05	0.007079548	0.96
unclassified	k__Bacteria;p__Proteobacteria;c__Gammaproteobacteria;o__Thiotrichales;f__Francisellaceae;g__Francisella;s__Francisella tularensis;t__Francisella tularensis subsp. holarctica	0.721687836	4.66E-05	0.007079548	0.96
unclassified	k__Bacteria;p__Proteobacteria;c__Deltaproteobacteria;o__Myxococcales;f__Polyangiaceae;g__Chondromyces;s__Chondromyces apiculatus	0.721687836	4.66E-05	0.007079548	0.96
unclassified	k__Bacteria;p__Proteobacteria;c__Gammaproteobacteria;o__Thiotrichales;f__Francisellaceae;g__Francisella;s__Francisella sp. W12-1067	0.721687836	4.66E-05	0.007079548	0.96
Phenylacetamides	k__Bacteria;p__Proteobacteria;c__Alphaproteobacteria;o__Rhizobiales;f__Phyllobacteriaceae;g__Mesorhizobium;s__Mesorhizobium plurifarium	0.721687836	4.66E-05	0.007079548	0.92
Phenylacetamides	k__Bacteria;p__Proteobacteria;c__Alphaproteobacteria;o__Rhodobacterales;f__Rhodobacteraceae;g__Thalassobacter;s__Thalassobacter stenotrophicus	0.721687836	4.66E-05	0.007079548	0.92
Long-chain fatty acids	k__Bacteria;p__Proteobacteria;c__Gammaproteobacteria;o__Chromatiales;f__Chromatiaceae;g__Rheinheimera;s__Rheinheimera perlucida	0.713828777	6.15E-05	0.009214988	0.8
Long-chain fatty acids	k__Bacteria;p__Proteobacteria;c__Betaproteobacteria;o__Rhodocyclales;f__Rhodocyclaceae;g__;s__Rhodocyclaceae bacterium Paddy-1	0.708286839	7.44E-05	0.010941237	0.8
unclassified	k__Bacteria;p__Proteobacteria;c__Deltaproteobacteria;o__Myxococcales;f__Polyangiaceae;g__Chondromyces;s__Chondromyces apiculatus	0.706439384	7.92E-05	0.011476762	0.84
unclassified	k__Bacteria;p__Proteobacteria;c__Betaproteobacteria;o__Neisseriales;f__Neisseriaceae;g__Neisseria;s__Neisseria mucosa	0.695189891	0.000114703	0.01609583	0.68
#N/A	k__Bacteria;p__Proteobacteria;c__Deltaproteobacteria;o__Desulfovibrionales;f__Desulfovibrionaceae;g__Lawsonia;s__Lawsonia intracellularis	0.681648174	0.000175367	0.02379945	0.64
#N/A	k__Bacteria;p__Proteobacteria;c__Betaproteobacteria;o__Neisseriales;f__Neisseriaceae;g__Neisseria;s__Neisseria lactamica	0.680940893	0.000179191	0.024064562	0.88
#N/A	k__Bacteria;p__Proteobacteria;c__Betaproteobacteria;o__Neisseriales;f__Neisseriaceae;g__Neisseria;s__Neisseria elongata;t__Neisseria elongata subsp. glycolytica	0.680940893	0.000179191	0.024064562	0.88
#N/A	k__Bacteria;p__Proteobacteria;c__Betaproteobacteria;o__Neisseriales;f__Neisseriaceae;g__Kingella;s__Kingella denitrificans	0.680940893	0.000179191	0.024064562	0.88
unclassified	k__Bacteria;p__Proteobacteria;c__Betaproteobacteria;o__Neisseriales;f__Neisseriaceae;g__Neisseria;s__Neisseria lactamica	0.680034301	0.000184199	0.024638468	0.68
unclassified	k__Bacteria;p__Proteobacteria;c__Betaproteobacteria;o__Neisseriales;f__Neisseriaceae;g__Kingella;s__Kingella denitrificans	0.680034301	0.000184199	0.024638468	0.68
#N/A	k__Bacteria;p__Proteobacteria;c__Deltaproteobacteria;o__Desulfovibrionales;f__Desulfovibrionaceae;g__Lawsonia;s__Lawsonia intracellularis	0.679835015	0.000185316	0.024763954	0.64
unclassified	k__Bacteria;p__Proteobacteria;c__Gammaproteobacteria;o__Pasteurellales;f__Pasteurellaceae;g__Mannheimia;s__Mannheimia haemolytica	0.676422367	0.00020539	0.027051071	0.8
#N/A	k__Bacteria;p__Proteobacteria;c__Betaproteobacteria;o__Neisseriales;f__Neisseriaceae;g__Neisseria;s__Neisseria elongata;t__Neisseria elongata subsp. glycolytica	0.674450704	0.000217834	0.028325784	0.76
Phenylmethylamines	k__Bacteria;p__Proteobacteria;c__Betaproteobacteria;o__Neisseriales;f__Neisseriaceae;g__Neisseria;s__Neisseria lactamica	0.674450704	0.000217834	0.028325784	0.76
Phenylmethylamines	k__Bacteria;p__Proteobacteria;c__Betaproteobacteria;o__Neisseriales;f__Neisseriaceae;g__Kingella;s__Kingella denitrificans	0.674450704	0.000217834	0.028325784	0.76
#N/A	k__Bacteria;p__Proteobacteria;c__Gammaproteobacteria;o__Thiotrichales;f__Francisellaceae;g__Francisella;s__Francisella tularensis;t__Francisella tularensis subsp. holarctica	0.67345624	0.000224357	0.028786969	0.8
#N/A	k__Bacteria;p__Proteobacteria;c__Gammaproteobacteria;o__Thiotrichales;f__Francisellaceae;g__Francisella;s__Francisella sp. W12-1067	0.67345624	0.000224357	0.028786969	0.8
unclassified	k__Bacteria;p__Proteobacteria;c__Gammaproteobacteria;o__Thiotrichales;f__Francisellaceae;g__Francisella;s__Francisella tularensis;t__Francisella tularensis subsp. holarctica	0.67345624	0.000224357	0.028786969	0.8
unclassified	k__Bacteria;p__Proteobacteria;c__Gammaproteobacteria;o__Thiotrichales;f__Francisellaceae;g__Francisella;s__Francisella sp. W12-1067	0.67345624	0.000224357	0.028786969	0.8
unclassified	k__Bacteria;p__Proteobacteria;c__Deltaproteobacteria;o__Myxococcales;f__Polyangiaceae;g__Chondromyces;s__Chondromyces apiculatus	0.673165066	0.000226298	0.028786969	0.84
unclassified	k__Bacteria;p__Proteobacteria;c__Gammaproteobacteria;o__Thiotrichales;f__Francisellaceae;g__Francisella;s__Francisella tularensis;t__Francisella tularensis subsp. holarctica	0.67111785	0.000240371	0.029985836	0.8
unclassified	k__Bacteria;p__Proteobacteria;c__Gammaproteobacteria;o__Thiotrichales;f__Francisellaceae;g__Francisella;s__Francisella sp. W12-1067	0.67111785	0.000240371	0.029985836	0.8
unclassified	k__Bacteria;p__Proteobacteria;c__Gammaproteobacteria;o__Thiotrichales;f__Francisellaceae;g__Francisella;s__Francisella tularensis;t__Francisella tularensis subsp. holarctica	0.670605503	0.00024401	0.029985836	0.84
unclassified	k__Bacteria;p__Proteobacteria;c__Gammaproteobacteria;o__Thiotrichales;f__Francisellaceae;g__Francisella;s__Francisella sp. W12-1067	0.670605503	0.00024401	0.029985836	0.84
#N/A	k__Bacteria;p__Proteobacteria;c__Gammaproteobacteria;o__Thiotrichales;f__Francisellaceae;g__Francisella;s__Francisella tularensis;t__Francisella tularensis subsp. holarctica	0.66804594	0.00026292	0.029985836	0.84
#N/A	k__Bacteria;p__Proteobacteria;c__Gammaproteobacteria;o__Thiotrichales;f__Francisellaceae;g__Francisella;s__Francisella sp. W12-1067	0.66804594	0.00026292	0.029985836	0.84
1-acyl-sn-glycero-3-phosphocholines	k__Bacteria;p__Proteobacteria;c__Gammaproteobacteria;o__Chromatiales;f__Chromatiaceae;g__Rheinheimera;s__Rheinheimera perlucida	0.666264454	0.000276826	0.029985836	0.88
Phenylmethylamines	k__Bacteria;p__Proteobacteria;c__Betaproteobacteria;o__Burkholderiales;f__Comamonadaceae;g__Ottowia;s__Ottowia thiooxydans	0.662673034	0.000306822	0.029985836	0.76
#N/A	k__Bacteria;p__Proteobacteria;c__Gammaproteobacteria;o__Chromatiales;f__Chromatiaceae;g__Rheinheimera;s__Rheinheimera perlucida	0.662643452	0.00030708	0.029985836	0.88
#N/A	k__Bacteria;p__Proteobacteria;c__Gammaproteobacteria;o__Chromatiales;f__Chromatiaceae;g__Rheinheimera;s__Rheinheimera perlucida	0.662643452	0.00030708	0.029985836	0.88
#N/A	k__Bacteria;p__Proteobacteria;c__Gammaproteobacteria;o__Enterobacterales;f__Yersiniaceae;g__Yersinia;s__Yersinia pestis	0.662172006	0.000311224	0.029985836	0.88
Dipeptides	k__Bacteria;p__Proteobacteria;c__Deltaproteobacteria;o__Myxococcales;f__Polyangiaceae;g__Chondromyces;s__Chondromyces apiculatus	0.661547183	0.000316791	0.029985836	0.96
Dipeptides	k__Bacteria;p__Proteobacteria;c__Gammaproteobacteria;o__Thiotrichales;f__Francisellaceae;g__Francisella;s__Francisella tularensis;t__Francisella tularensis subsp. holarctica	0.661547183	0.000316791	0.029985836	0.96
Dipeptides	k__Bacteria;p__Proteobacteria;c__Gammaproteobacteria;o__Thiotrichales;f__Francisellaceae;g__Francisella;s__Francisella sp. W12-1067	0.661547183	0.000316791	0.029985836	0.96
unclassified	k__Bacteria;p__Proteobacteria;c__Deltaproteobacteria;o__Myxococcales;f__Polyangiaceae;g__Chondromyces;s__Chondromyces apiculatus	0.661547183	0.000316791	0.029985836	0.96
unclassified	k__Bacteria;p__Proteobacteria;c__Gammaproteobacteria;o__Thiotrichales;f__Francisellaceae;g__Francisella;s__Francisella tularensis;t__Francisella tularensis subsp. holarctica	0.661547183	0.000316791	0.029985836	0.96
unclassified	k__Bacteria;p__Proteobacteria;c__Gammaproteobacteria;o__Thiotrichales;f__Francisellaceae;g__Francisella;s__Francisella sp. W12-1067	0.661547183	0.000316791	0.029985836	0.96
unclassified	k__Bacteria;p__Proteobacteria;c__Deltaproteobacteria;o__Myxococcales;f__Polyangiaceae;g__Chondromyces;s__Chondromyces apiculatus	0.661547183	0.000316791	0.029985836	0.96
unclassified	k__Bacteria;p__Proteobacteria;c__Gammaproteobacteria;o__Thiotrichales;f__Francisellaceae;g__Francisella;s__Francisella tularensis;t__Francisella tularensis subsp. holarctica	0.661547183	0.000316791	0.029985836	0.96
unclassified	k__Bacteria;p__Proteobacteria;c__Gammaproteobacteria;o__Thiotrichales;f__Francisellaceae;g__Francisella;s__Francisella sp. W12-1067	0.661547183	0.000316791	0.029985836	0.96
Monohydroxy bile acids, alcohols and derivatives	k__Bacteria;p__Proteobacteria;c__Alphaproteobacteria;o__Rhizobiales;f__Phyllobacteriaceae;g__Mesorhizobium;s__Mesorhizobium plurifarium	0.661547183	0.000316791	0.029985836	0.92
Monohydroxy bile acids, alcohols and derivatives	k__Bacteria;p__Proteobacteria;c__Alphaproteobacteria;o__Rhodobacterales;f__Rhodobacteraceae;g__Thalassobacter;s__Thalassobacter stenotrophicus	0.661547183	0.000316791	0.029985836	0.92
Lineolic acids and derivatives	k__Bacteria;p__Proteobacteria;c__Alphaproteobacteria;o__Rhizobiales;f__Phyllobacteriaceae;g__Mesorhizobium;s__Mesorhizobium plurifarium	0.661547183	0.000316791	0.029985836	0.92
Lineolic acids and derivatives	k__Bacteria;p__Proteobacteria;c__Alphaproteobacteria;o__Rhodobacterales;f__Rhodobacteraceae;g__Thalassobacter;s__Thalassobacter stenotrophicus	0.661547183	0.000316791	0.029985836	0.92
unclassified	k__Bacteria;p__Proteobacteria;c__Gammaproteobacteria;o__Thiotrichales;f__Francisellaceae;g__Francisella;s__Francisella tularensis;t__Francisella tularensis subsp. holarctica	0.661547183	0.000316791	0.029985836	0.96
unclassified	k__Bacteria;p__Proteobacteria;c__Gammaproteobacteria;o__Thiotrichales;f__Francisellaceae;g__Francisella;s__Francisella sp. W12-1067	0.661547183	0.000316791	0.029985836	0.96
#N/A	k__Bacteria;p__Proteobacteria;c__Gammaproteobacteria;o__Thiotrichales;f__Francisellaceae;g__Francisella;s__Francisella tularensis;t__Francisella tularensis subsp. holarctica	0.661547183	0.000316791	0.029985836	0.96
#N/A	k__Bacteria;p__Proteobacteria;c__Gammaproteobacteria;o__Thiotrichales;f__Francisellaceae;g__Francisella;s__Francisella sp. W12-1067	0.661547183	0.000316791	0.029985836	0.96
Alpha amino acids	k__Bacteria;p__Proteobacteria;c__Deltaproteobacteria;o__Myxococcales;f__Polyangiaceae;g__Chondromyces;s__Chondromyces apiculatus	0.661547183	0.000316791	0.029985836	0.96
#N/A	k__Bacteria;p__Proteobacteria;c__Alphaproteobacteria;o__Rhizobiales;f__Phyllobacteriaceae;g__Mesorhizobium;s__Mesorhizobium plurifarium	0.661547183	0.000316791	0.029985836	0.92
#N/A	k__Bacteria;p__Proteobacteria;c__Alphaproteobacteria;o__Rhodobacterales;f__Rhodobacteraceae;g__Thalassobacter;s__Thalassobacter stenotrophicus	0.661547183	0.000316791	0.029985836	0.92
unclassified	k__Bacteria;p__Proteobacteria;c__Gammaproteobacteria;o__Thiotrichales;f__Francisellaceae;g__Francisella;s__Francisella tularensis;t__Francisella tularensis subsp. holarctica	0.661547183	0.000316791	0.029985836	0.96
unclassified	k__Bacteria;p__Proteobacteria;c__Gammaproteobacteria;o__Thiotrichales;f__Francisellaceae;g__Francisella;s__Francisella sp. W12-1067	0.661547183	0.000316791	0.029985836	0.96
unclassified	k__Bacteria;p__Proteobacteria;c__Gammaproteobacteria;o__Thiotrichales;f__Francisellaceae;g__Francisella;s__Francisella tularensis;t__Francisella tularensis subsp. holarctica	0.661547183	0.000316791	0.029985836	0.96
unclassified	k__Bacteria;p__Proteobacteria;c__Gammaproteobacteria;o__Thiotrichales;f__Francisellaceae;g__Francisella;s__Francisella sp. W12-1067	0.661547183	0.000316791	0.029985836	0.96
unclassified	k__Bacteria;p__Proteobacteria;c__Deltaproteobacteria;o__Myxococcales;f__Polyangiaceae;g__Chondromyces;s__Chondromyces apiculatus	0.661547183	0.000316791	0.029985836	0.96
#N/A	k__Bacteria;p__Proteobacteria;c__Deltaproteobacteria;o__Myxococcales;f__Polyangiaceae;g__Chondromyces;s__Chondromyces apiculatus	0.661547183	0.000316791	0.029985836	0.96
unclassified	k__Bacteria;p__Proteobacteria;c__Deltaproteobacteria;o__Myxococcales;f__Polyangiaceae;g__Chondromyces;s__Chondromyces apiculatus	0.661547183	0.000316791	0.029985836	0.96
#N/A	k__Bacteria;p__Proteobacteria;c__Deltaproteobacteria;o__Myxococcales;f__Polyangiaceae;g__Chondromyces;s__Chondromyces apiculatus	0.661547183	0.000316791	0.029985836	0.96
Long-chain fatty acids	k__Bacteria;p__Proteobacteria;c__Gammaproteobacteria;o__Thiotrichales;f__Francisellaceae;g__Francisella;s__Francisella tularensis;t__Francisella tularensis subsp. holarctica	0.661547183	0.000316791	0.029985836	0.96
Long-chain fatty acids	k__Bacteria;p__Proteobacteria;c__Gammaproteobacteria;o__Thiotrichales;f__Francisellaceae;g__Francisella;s__Francisella sp. W12-1067	0.661547183	0.000316791	0.029985836	0.96
unclassified	k__Bacteria;p__Proteobacteria;c__Deltaproteobacteria;o__Myxococcales;f__Polyangiaceae;g__Chondromyces;s__Chondromyces apiculatus	0.661547183	0.000316791	0.029985836	0.96
unclassified	k__Bacteria;p__Proteobacteria;c__Deltaproteobacteria;o__Myxococcales;f__Polyangiaceae;g__Chondromyces;s__Chondromyces apiculatus	0.661547183	0.000316791	0.029985836	0.96
unclassified	k__Bacteria;p__Proteobacteria;c__Deltaproteobacteria;o__Myxococcales;f__Polyangiaceae;g__Chondromyces;s__Chondromyces apiculatus	0.661547183	0.000316791	0.029985836	0.96
unclassified	k__Bacteria;p__Proteobacteria;c__Gammaproteobacteria;o__Thiotrichales;f__Francisellaceae;g__Francisella;s__Francisella tularensis;t__Francisella tularensis subsp. holarctica	0.661547183	0.000316791	0.029985836	0.96
unclassified	k__Bacteria;p__Proteobacteria;c__Gammaproteobacteria;o__Thiotrichales;f__Francisellaceae;g__Francisella;s__Francisella sp. W12-1067	0.661547183	0.000316791	0.029985836	0.96
Stilbenes	k__Bacteria;p__Proteobacteria;c__Alphaproteobacteria;o__Rhizobiales;f__Phyllobacteriaceae;g__Mesorhizobium;s__Mesorhizobium plurifarium	0.661547183	0.000316791	0.029985836	0.92
Stilbenes	k__Bacteria;p__Proteobacteria;c__Alphaproteobacteria;o__Rhodobacterales;f__Rhodobacteraceae;g__Thalassobacter;s__Thalassobacter stenotrophicus	0.661547183	0.000316791	0.029985836	0.92
#N/A	k__Bacteria;p__Proteobacteria;c__Gammaproteobacteria;o__Thiotrichales;f__Francisellaceae;g__Francisella;s__Francisella tularensis;t__Francisella tularensis subsp. holarctica	0.661547183	0.000316791	0.029985836	0.96
#N/A	k__Bacteria;p__Proteobacteria;c__Gammaproteobacteria;o__Thiotrichales;f__Francisellaceae;g__Francisella;s__Francisella sp. W12-1067	0.661547183	0.000316791	0.029985836	0.96
unclassified	k__Bacteria;p__Proteobacteria;c__Alphaproteobacteria;o__Rhizobiales;f__Phyllobacteriaceae;g__Mesorhizobium;s__Mesorhizobium plurifarium	0.661547183	0.000316791	0.029985836	0.92
unclassified	k__Bacteria;p__Proteobacteria;c__Alphaproteobacteria;o__Rhodobacterales;f__Rhodobacteraceae;g__Thalassobacter;s__Thalassobacter stenotrophicus	0.661547183	0.000316791	0.029985836	0.92
unclassified	k__Bacteria;p__Proteobacteria;c__Deltaproteobacteria;o__Myxococcales;f__Polyangiaceae;g__Chondromyces;s__Chondromyces apiculatus	0.661547183	0.000316791	0.029985836	0.96
Acetanilides	k__Bacteria;p__Proteobacteria;c__Deltaproteobacteria;o__Myxococcales;f__Polyangiaceae;g__Chondromyces;s__Chondromyces apiculatus	0.661547183	0.000316791	0.029985836	0.96
Amino fatty acids	k__Bacteria;p__Proteobacteria;c__Deltaproteobacteria;o__Myxococcales;f__Polyangiaceae;g__Chondromyces;s__Chondromyces apiculatus	0.661547183	0.000316791	0.029985836	0.96
#N/A	k__Bacteria;p__Proteobacteria;c__Gammaproteobacteria;o__Thiotrichales;f__Francisellaceae;g__Francisella;s__Francisella tularensis;t__Francisella tularensis subsp. holarctica	0.661547183	0.000316791	0.029985836	0.96
#N/A	k__Bacteria;p__Proteobacteria;c__Gammaproteobacteria;o__Thiotrichales;f__Francisellaceae;g__Francisella;s__Francisella sp. W12-1067	0.661547183	0.000316791	0.029985836	0.96
#N/A	k__Bacteria;p__Proteobacteria;c__Deltaproteobacteria;o__Myxococcales;f__Polyangiaceae;g__Chondromyces;s__Chondromyces apiculatus	0.661547183	0.000316791	0.029985836	0.96
unclassified	k__Bacteria;p__Proteobacteria;c__Deltaproteobacteria;o__Myxococcales;f__Polyangiaceae;g__Chondromyces;s__Chondromyces apiculatus	0.661547183	0.000316791	0.029985836	0.96
unclassified	k__Bacteria;p__Proteobacteria;c__Gammaproteobacteria;o__Thiotrichales;f__Francisellaceae;g__Francisella;s__Francisella tularensis;t__Francisella tularensis subsp. holarctica	0.661547183	0.000316791	0.029985836	0.96
unclassified	k__Bacteria;p__Proteobacteria;c__Gammaproteobacteria;o__Thiotrichales;f__Francisellaceae;g__Francisella;s__Francisella sp. W12-1067	0.661547183	0.000316791	0.029985836	0.96
Diphenylmethanes	k__Bacteria;p__Proteobacteria;c__Gammaproteobacteria;o__Thiotrichales;f__Francisellaceae;g__Francisella;s__Francisella tularensis;t__Francisella tularensis subsp. holarctica	0.661547183	0.000316791	0.029985836	0.96
Diphenylmethanes	k__Bacteria;p__Proteobacteria;c__Gammaproteobacteria;o__Thiotrichales;f__Francisellaceae;g__Francisella;s__Francisella sp. W12-1067	0.661547183	0.000316791	0.029985836	0.96
#N/A	k__Bacteria;p__Proteobacteria;c__Gammaproteobacteria;o__Thiotrichales;f__Francisellaceae;g__Francisella;s__Francisella tularensis;t__Francisella tularensis subsp. holarctica	0.661547183	0.000316791	0.029985836	0.96
#N/A	k__Bacteria;p__Proteobacteria;c__Gammaproteobacteria;o__Thiotrichales;f__Francisellaceae;g__Francisella;s__Francisella sp. W12-1067	0.661547183	0.000316791	0.029985836	0.96
unclassified	k__Bacteria;p__Proteobacteria;c__Gammaproteobacteria;o__Thiotrichales;f__Francisellaceae;g__Francisella;s__Francisella tularensis;t__Francisella tularensis subsp. holarctica	0.661547183	0.000316791	0.029985836	0.96
unclassified	k__Bacteria;p__Proteobacteria;c__Gammaproteobacteria;o__Thiotrichales;f__Francisellaceae;g__Francisella;s__Francisella sp. W12-1067	0.661547183	0.000316791	0.029985836	0.96
unclassified	k__Bacteria;p__Proteobacteria;c__Gammaproteobacteria;o__Thiotrichales;f__Francisellaceae;g__Francisella;s__Francisella tularensis;t__Francisella tularensis subsp. holarctica	0.661547183	0.000316791	0.029985836	0.96
unclassified	k__Bacteria;p__Proteobacteria;c__Gammaproteobacteria;o__Thiotrichales;f__Francisellaceae;g__Francisella;s__Francisella sp. W12-1067	0.661547183	0.000316791	0.029985836	0.96
unclassified	k__Bacteria;p__Proteobacteria;c__Alphaproteobacteria;o__Rhizobiales;f__Phyllobacteriaceae;g__Mesorhizobium;s__Mesorhizobium plurifarium	0.661547183	0.000316791	0.029985836	0.92
unclassified	k__Bacteria;p__Proteobacteria;c__Alphaproteobacteria;o__Rhodobacterales;f__Rhodobacteraceae;g__Thalassobacter;s__Thalassobacter stenotrophicus	0.661547183	0.000316791	0.029985836	0.92
unclassified	k__Bacteria;p__Proteobacteria;c__Alphaproteobacteria;o__Rhizobiales;f__Phyllobacteriaceae;g__Mesorhizobium;s__Mesorhizobium plurifarium	0.661547183	0.000316791	0.029985836	0.92
unclassified	k__Bacteria;p__Proteobacteria;c__Alphaproteobacteria;o__Rhodobacterales;f__Rhodobacteraceae;g__Thalassobacter;s__Thalassobacter stenotrophicus	0.661547183	0.000316791	0.029985836	0.92
unclassified	k__Bacteria;p__Proteobacteria;c__Gammaproteobacteria;o__Thiotrichales;f__Francisellaceae;g__Francisella;s__Francisella tularensis;t__Francisella tularensis subsp. holarctica	0.661547183	0.000316791	0.029985836	0.96
unclassified	k__Bacteria;p__Proteobacteria;c__Gammaproteobacteria;o__Thiotrichales;f__Francisellaceae;g__Francisella;s__Francisella sp. W12-1067	0.661547183	0.000316791	0.029985836	0.96
unclassified	k__Bacteria;p__Proteobacteria;c__Deltaproteobacteria;o__Myxococcales;f__Polyangiaceae;g__Chondromyces;s__Chondromyces apiculatus	0.661547183	0.000316791	0.029985836	0.96
unclassified	k__Bacteria;p__Proteobacteria;c__Gammaproteobacteria;o__Thiotrichales;f__Francisellaceae;g__Francisella;s__Francisella tularensis;t__Francisella tularensis subsp. holarctica	0.661547183	0.000316791	0.029985836	0.96
unclassified	k__Bacteria;p__Proteobacteria;c__Gammaproteobacteria;o__Thiotrichales;f__Francisellaceae;g__Francisella;s__Francisella sp. W12-1067	0.661547183	0.000316791	0.029985836	0.96
unclassified	k__Bacteria;p__Proteobacteria;c__Betaproteobacteria;o__Neisseriales;f__Neisseriaceae;g__Neisseria;s__Neisseria mucosa	0.658105767	0.000349034	0.032774276	0.88
Harmala alkaloids	k__Bacteria;p__Proteobacteria;c__Deltaproteobacteria;o__Desulfovibrionales;f__Desulfovibrionaceae;g__Lawsonia;s__Lawsonia intracellularis	0.654296805	0.00038802	0.036119251	0.84
#N/A	k__Bacteria;p__Proteobacteria;c__Betaproteobacteria;o__Rhodocyclales;f__Rhodocyclaceae;g__;s__Rhodocyclaceae bacterium Paddy-1	0.649941441	0.000437193	0.039900919	0.88
1-acyl-sn-glycero-3-phosphocholines	k__Bacteria;p__Proteobacteria;c__Betaproteobacteria;o__Rhodocyclales;f__Rhodocyclaceae;g__;s__Rhodocyclaceae bacterium Paddy-1	0.649941441	0.000437193	0.039900919	0.88
#N/A	k__Bacteria;p__Proteobacteria;c__Betaproteobacteria;o__Rhodocyclales;f__Rhodocyclaceae;g__;s__Rhodocyclaceae bacterium Paddy-1	0.649941441	0.000437193	0.039900919	0.88
Harmala alkaloids	k__Bacteria;p__Proteobacteria;c__Deltaproteobacteria;o__Desulfovibrionales;f__Desulfovibrionaceae;g__Lawsonia;s__Lawsonia intracellularis	0.646109584	0.000484848	0.04368325	0.84
Harmala alkaloids	k__Bacteria;p__Proteobacteria;c__Betaproteobacteria;o__Neisseriales;f__Neisseriaceae;g__Neisseria;s__Neisseria elongata;t__Neisseria elongata subsp. glycolytica	0.645958987	0.000486809	0.04368325	0.88
unclassified	k__Bacteria;p__Proteobacteria;c__Betaproteobacteria;o__Neisseriales;f__Neisseriaceae;g__Neisseria;s__Neisseria elongata;t__Neisseria elongata subsp. glycolytica	0.645958987	0.000486809	0.04368325	0.88
unclassified	k__Bacteria;p__Proteobacteria;c__Deltaproteobacteria;o__Myxococcales;f__Polyangiaceae;g__Chondromyces;s__Chondromyces apiculatus	0.645395563	0.000494209	0.044186003	0.8
unclassified	k__Bacteria;p__Proteobacteria;c__Deltaproteobacteria;o__Myxococcales;f__Polyangiaceae;g__Chondromyces;s__Chondromyces apiculatus	0.645395563	0.000494209	0.044186003	0.8
#N/A	k__Bacteria;p__Proteobacteria;c__Gammaproteobacteria;o__Thiotrichales;f__Francisellaceae;g__Francisella;s__Francisella tularensis;t__Francisella tularensis subsp. holarctica	0.64245031	0.000534504	0.047204954	0.84
#N/A	k__Bacteria;p__Proteobacteria;c__Gammaproteobacteria;o__Thiotrichales;f__Francisellaceae;g__Francisella;s__Francisella sp. W12-1067	0.64245031	0.000534504	0.047204954	0.84
unclassified	k__Bacteria;p__Proteobacteria;c__Gammaproteobacteria;o__Thiotrichales;f__Francisellaceae;g__Francisella;s__Francisella tularensis;t__Francisella tularensis subsp. holarctica	0.64245031	0.000534504	0.047204954	0.84
unclassified	k__Bacteria;p__Proteobacteria;c__Gammaproteobacteria;o__Thiotrichales;f__Francisellaceae;g__Francisella;s__Francisella sp. W12-1067	0.64245031	0.000534504	0.047204954	0.84
unclassified	k__Bacteria;p__Proteobacteria;c__Gammaproteobacteria;o__Enterobacterales;f__Yersiniaceae;g__Yersinia;s__Yersinia pestis	0.642286763	0.000536822	0.047387033	0.84
unclassified	k__Bacteria;p__Proteobacteria;c__Betaproteobacteria;o__Burkholderiales;f__Comamonadaceae;g__Ottowia;s__Ottowia thiooxydans	0.641488968	0.000548259	0.048244953	0.84
Phenylmethylamines	k__Bacteria;p__Proteobacteria;c__Gammaproteobacteria;o__Chromatiales;f__Chromatiaceae;g__Rheinheimera;s__Rheinheimera perlucida	0.641205916	0.000552367	0.048572314	0.76
unclassified	k__Bacteria;p__Proteobacteria;c__Gammaproteobacteria;o__Chromatiales;f__Chromatiaceae;g__Rheinheimera;s__Rheinheimera perlucida	0.641205916	0.000552367	0.048572314	0.76
#N/A	k__Bacteria;p__Proteobacteria;c__Gammaproteobacteria;o__Thiotrichales;f__Francisellaceae;g__Francisella;s__Francisella tularensis;t__Francisella tularensis subsp. holarctica	0.640718784	0.000559499	0.048982331	0.8
#N/A	k__Bacteria;p__Proteobacteria;c__Gammaproteobacteria;o__Thiotrichales;f__Francisellaceae;g__Francisella;s__Francisella sp. W12-1067	0.640718784	0.000559499	0.048982331	0.8
unclassified	k__Bacteria;p__Proteobacteria;c__Betaproteobacteria;o__Rhodocyclales;f__Rhodocyclaceae;g__;s__Rhodocyclaceae bacterium Paddy-1	0.638818233	0.000588096	0.051242586	0.68
Phenylmethylamines	k__Bacteria;p__Proteobacteria;c__Betaproteobacteria;o__Rhodocyclales;f__Rhodocyclaceae;g__;s__Rhodocyclaceae bacterium Paddy-1	0.637814867	0.000603698	0.052440958	0.76
unclassified	k__Bacteria;p__Proteobacteria;c__Betaproteobacteria;o__Rhodocyclales;f__Rhodocyclaceae;g__;s__Rhodocyclaceae bacterium Paddy-1	0.637814867	0.000603698	0.052440958	0.76
unclassified	k__Bacteria;p__Proteobacteria;c__Gammaproteobacteria;o__Chromatiales;f__Chromatiaceae;g__Rheinheimera;s__Rheinheimera perlucida	0.637296435	0.000611899	0.052871066	0.88
unclassified	k__Bacteria;p__Proteobacteria;c__Gammaproteobacteria;o__Chromatiales;f__Chromatiaceae;g__Rheinheimera;s__Rheinheimera perlucida	0.637296435	0.000611899	0.052871066	0.88
Bile acids, alcohols and derivatives	k__Bacteria;p__Proteobacteria;c__Deltaproteobacteria;o__Desulfovibrionales;f__Desulfovibrionaceae;g__Lawsonia;s__Lawsonia intracellularis	0.636493377	0.000624793	0.053909402	0.64
unclassified	k__Bacteria;p__Proteobacteria;c__Gammaproteobacteria;o__Pasteurellales;f__Pasteurellaceae;g__Haemophilus;s__Haemophilus sputorum	0.636148568	0.000630402	0.054362535	0.24
Bile acids, alcohols and derivatives	k__Bacteria;p__Proteobacteria;c__Deltaproteobacteria;o__Desulfovibrionales;f__Desulfovibrionaceae;g__Lawsonia;s__Lawsonia intracellularis	0.633071016	0.00068242	0.058439529	0.64
unclassified	k__Bacteria;p__Proteobacteria;c__Gammaproteobacteria;o__Chromatiales;f__Chromatiaceae;g__Rheinheimera;s__Rheinheimera perlucida	0.631900395	0.00070316	0.059978841	0.68
unclassified	k__Bacteria;p__Proteobacteria;c__Betaproteobacteria;o__Burkholderiales;f__Comamonadaceae;g__Ottowia;s__Ottowia thiooxydans	0.631082191	0.000717978	0.061157934	0.76
#N/A	k__Bacteria;p__Proteobacteria;c__Betaproteobacteria;o__Neisseriales;f__Neisseriaceae;g__Neisseria;s__Neisseria elongata;t__Neisseria elongata subsp. glycolytica	0.630820469	0.000722775	0.061499331	0.76
Oligopeptides	k__Bacteria;p__Proteobacteria;c__Deltaproteobacteria;o__Desulfovibrionales;f__Desulfovibrionaceae;g__Lawsonia;s__Lawsonia intracellularis	0.630279236	0.000732782	0.062251186	0.84
Glycinated bile acids and derivatives	k__Bacteria;p__Proteobacteria;c__Gammaproteobacteria;o__Thiotrichales;f__Francisellaceae;g__Francisella;s__Francisella tularensis;t__Francisella tularensis subsp. holarctica	0.628108707	0.000774129	0.065148343	0.76
Glycinated bile acids and derivatives	k__Bacteria;p__Proteobacteria;c__Gammaproteobacteria;o__Thiotrichales;f__Francisellaceae;g__Francisella;s__Francisella sp. W12-1067	0.628108707	0.000774129	0.065148343	0.76
Oligopeptides	k__Bacteria;p__Proteobacteria;c__Deltaproteobacteria;o__Desulfovibrionales;f__Desulfovibrionaceae;g__Lawsonia;s__Lawsonia intracellularis	0.621371154	0.000915585	0.075260972	0.84
Dipeptides	k__Bacteria;p__Proteobacteria;c__Deltaproteobacteria;o__Desulfovibrionales;f__Desulfovibrionaceae;g__Lawsonia;s__Lawsonia intracellularis	0.62046289	0.000936263	0.076743994	0.6
unclassified	k__Bacteria;p__Proteobacteria;c__Betaproteobacteria;o__Neisseriales;f__Neisseriaceae;g__Neisseria;s__Neisseria lactamica	0.619787328	0.000951903	0.077870211	0.6
unclassified	k__Bacteria;p__Proteobacteria;c__Betaproteobacteria;o__Neisseriales;f__Neisseriaceae;g__Kingella;s__Kingella denitrificans	0.619787328	0.000951903	0.077870211	0.6
unclassified	k__Bacteria;p__Proteobacteria;c__Betaproteobacteria;o__Rhodocyclales;f__Rhodocyclaceae;g__;s__Rhodocyclaceae bacterium Paddy-1	0.619711607	0.00095367	0.077991694	0.88
unclassified	k__Bacteria;p__Proteobacteria;c__Betaproteobacteria;o__Rhodocyclales;f__Rhodocyclaceae;g__;s__Rhodocyclaceae bacterium Paddy-1	0.619711607	0.00095367	0.077991694	0.88
unclassified	k__Bacteria;p__Proteobacteria;c__Betaproteobacteria;o__Rhodocyclales;f__Rhodocyclaceae;g__;s__Rhodocyclaceae bacterium Paddy-1	0.619711607	0.00095367	0.077991694	0.88
unclassified	k__Bacteria;p__Proteobacteria;c__Betaproteobacteria;o__Rhodocyclales;f__Rhodocyclaceae;g__;s__Rhodocyclaceae bacterium Paddy-1	0.619711607	0.00095367	0.077991694	0.88
Dipeptides	k__Bacteria;p__Proteobacteria;c__Deltaproteobacteria;o__Desulfovibrionales;f__Desulfovibrionaceae;g__Lawsonia;s__Lawsonia intracellularis	0.618013906	0.000994037	0.080342683	0.6
unclassified	k__Bacteria;p__Proteobacteria;c__Deltaproteobacteria;o__Myxococcales;f__Polyangiaceae;g__Chondromyces;s__Chondromyces apiculatus	0.617334887	0.00101059	0.081395144	0.8
unclassified	k__Bacteria;p__Proteobacteria;c__Deltaproteobacteria;o__Desulfovibrionales;f__Desulfovibrionaceae;g__Lawsonia;s__Lawsonia intracellularis	0.617178743	0.00101443	0.081626966	0.84
unclassified	k__Bacteria;p__Proteobacteria;c__Deltaproteobacteria;o__Desulfovibrionales;f__Desulfovibrionaceae;g__Lawsonia;s__Lawsonia intracellularis	0.617041953	0.001017804	0.081868903	0.76
unclassified	k__Bacteria;p__Proteobacteria;c__Deltaproteobacteria;o__Desulfovibrionales;f__Desulfovibrionaceae;g__Lawsonia;s__Lawsonia intracellularis	0.616248828	0.00103756	0.083288434	0.76
#N/A	k__Bacteria;p__Proteobacteria;c__Betaproteobacteria;o__Neisseriales;f__Neisseriaceae;g__Neisseria;s__Neisseria lactamica	0.615802171	0.00104883	0.083526492	0.88
#N/A	k__Bacteria;p__Proteobacteria;c__Betaproteobacteria;o__Neisseriales;f__Neisseriaceae;g__Neisseria;s__Neisseria elongata;t__Neisseria elongata subsp. glycolytica	0.615802171	0.00104883	0.083526492	0.88
#N/A	k__Bacteria;p__Proteobacteria;c__Betaproteobacteria;o__Neisseriales;f__Neisseriaceae;g__Kingella;s__Kingella denitrificans	0.615802171	0.00104883	0.083526492	0.88
unclassified	k__Bacteria;p__Proteobacteria;c__Betaproteobacteria;o__Burkholderiales;f__Comamonadaceae;g__Delftia;s__Delftia acidovorans	0.615703795	0.001051326	0.083707226	0.88
unclassified	k__Bacteria;p__Proteobacteria;c__Deltaproteobacteria;o__Desulfovibrionales;f__Desulfovibrionaceae;g__Lawsonia;s__Lawsonia intracellularis	0.615550347	0.001055231	0.083969736	0.84
#N/A	k__Bacteria;p__Proteobacteria;c__Betaproteobacteria;o__Neisseriales;f__Neisseriaceae;g__Neisseria;s__Neisseria mucosa	0.615238765	0.001063197	0.084518529	0.92
#N/A	k__Bacteria;p__Proteobacteria;c__Gammaproteobacteria;o__Thiotrichales;f__Francisellaceae;g__Francisella;s__Francisella tularensis;t__Francisella tularensis subsp. holarctica	0.614996497	0.001069427	0.084612493	0.8
#N/A	k__Bacteria;p__Proteobacteria;c__Gammaproteobacteria;o__Thiotrichales;f__Francisellaceae;g__Francisella;s__Francisella sp. W12-1067	0.614996497	0.001069427	0.084612493	0.8
unclassified	k__Bacteria;p__Proteobacteria;c__Deltaproteobacteria;o__Myxococcales;f__Polyangiaceae;g__Chondromyces;s__Chondromyces apiculatus	0.614996497	0.001069427	0.084612493	0.8
#N/A	k__Bacteria;p__Proteobacteria;c__Gammaproteobacteria;o__Thiotrichales;f__Francisellaceae;g__Francisella;s__Francisella tularensis;t__Francisella tularensis subsp. holarctica	0.614996497	0.001069427	0.084612493	0.8
#N/A	k__Bacteria;p__Proteobacteria;c__Gammaproteobacteria;o__Thiotrichales;f__Francisellaceae;g__Francisella;s__Francisella sp. W12-1067	0.614996497	0.001069427	0.084612493	0.8
Dihydroxy bile acids, alcohols and derivatives	k__Bacteria;p__Proteobacteria;c__Deltaproteobacteria;o__Desulfovibrionales;f__Desulfovibrionaceae;g__Lawsonia;s__Lawsonia intracellularis	0.614389751	0.001085167	0.085753593	0.2
unclassified	k__Bacteria;p__Proteobacteria;c__Betaproteobacteria;o__Burkholderiales;f__Comamonadaceae;g__Ottowia;s__Ottowia thiooxydans	0.614184764	0.001090529	0.086140453	0.76
unclassified	k__Bacteria;p__Proteobacteria;c__Gammaproteobacteria;o__Thiotrichales;f__Francisellaceae;g__Francisella;s__Francisella tularensis;t__Francisella tularensis subsp. holarctica	0.612658107	0.001131191	0.088574479	0.8
unclassified	k__Bacteria;p__Proteobacteria;c__Gammaproteobacteria;o__Thiotrichales;f__Francisellaceae;g__Francisella;s__Francisella sp. W12-1067	0.612658107	0.001131191	0.088574479	0.8
Dihydroxy bile acids, alcohols and derivatives	k__Bacteria;p__Proteobacteria;c__Deltaproteobacteria;o__Desulfovibrionales;f__Desulfovibrionaceae;g__Lawsonia;s__Lawsonia intracellularis	0.611419082	0.001165146	0.090929782	0.2
Fatty aldehydes	k__Bacteria;p__Proteobacteria;c__Deltaproteobacteria;o__Myxococcales;f__Polyangiaceae;g__Chondromyces;s__Chondromyces apiculatus	0.610319717	0.001196004	0.091719112	0.8
#N/A	k__Bacteria;p__Proteobacteria;c__Betaproteobacteria;o__Burkholderiales;f__Comamonadaceae;g__Delftia;s__Delftia acidovorans	0.607959093	0.001264649	0.091719112	0.88
unclassified	k__Bacteria;p__Proteobacteria;c__Deltaproteobacteria;o__Myxococcales;f__Polyangiaceae;g__Chondromyces;s__Chondromyces apiculatus	0.606616428	0.001305184	0.091719112	0.84
#N/A	k__Bacteria;p__Proteobacteria;c__Deltaproteobacteria;o__Myxococcales;f__Polyangiaceae;g__Chondromyces;s__Chondromyces apiculatus	0.606616428	0.001305184	0.091719112	0.84
Triterpenoids	k__Bacteria;p__Proteobacteria;c__Betaproteobacteria;o__Neisseriales;f__Neisseriaceae;g__Neisseria;s__Neisseria lactamica	0.603716251	0.001396568	0.091719112	0.72
Triterpenoids	k__Bacteria;p__Proteobacteria;c__Betaproteobacteria;o__Neisseriales;f__Neisseriaceae;g__Kingella;s__Kingella denitrificans	0.603716251	0.001396568	0.091719112	0.72
unclassified	k__Bacteria;p__Proteobacteria;c__Betaproteobacteria;o__Neisseriales;f__Neisseriaceae;g__Neisseria;s__Neisseria mucosa	0.60354221	0.001402222	0.091719112	0.92
unclassified	k__Bacteria;p__Proteobacteria;c__Gammaproteobacteria;o__Chromatiales;f__Chromatiaceae;g__Rheinheimera;s__Rheinheimera perlucida	0.601929265	0.001455568	0.091719112	0.96
unclassified	k__Bacteria;p__Proteobacteria;c__Gammaproteobacteria;o__Chromatiales;f__Chromatiaceae;g__Rheinheimera;s__Rheinheimera perlucida	0.601929265	0.001455568	0.091719112	0.96
N-acyl amines	k__Bacteria;p__Proteobacteria;c__Gammaproteobacteria;o__Chromatiales;f__Chromatiaceae;g__Rheinheimera;s__Rheinheimera perlucida	0.601929265	0.001455568	0.091719112	0.96
#N/A	k__Bacteria;p__Proteobacteria;c__Gammaproteobacteria;o__Chromatiales;f__Chromatiaceae;g__Rheinheimera;s__Rheinheimera perlucida	0.601929265	0.001455568	0.091719112	0.96
Long-chain fatty acids	k__Bacteria;p__Proteobacteria;c__Gammaproteobacteria;o__Chromatiales;f__Chromatiaceae;g__Rheinheimera;s__Rheinheimera perlucida	0.601929265	0.001455568	0.091719112	0.96
unclassified	k__Bacteria;p__Proteobacteria;c__Gammaproteobacteria;o__Chromatiales;f__Chromatiaceae;g__Rheinheimera;s__Rheinheimera perlucida	0.601929265	0.001455568	0.091719112	0.96
Long-chain fatty acids	k__Bacteria;p__Proteobacteria;c__Gammaproteobacteria;o__Chromatiales;f__Chromatiaceae;g__Rheinheimera;s__Rheinheimera perlucida	0.601929265	0.001455568	0.091719112	0.96
unclassified	k__Bacteria;p__Proteobacteria;c__Gammaproteobacteria;o__Chromatiales;f__Chromatiaceae;g__Rheinheimera;s__Rheinheimera perlucida	0.601929265	0.001455568	0.091719112	0.96
unclassified	k__Bacteria;p__Proteobacteria;c__Gammaproteobacteria;o__Chromatiales;f__Chromatiaceae;g__Rheinheimera;s__Rheinheimera perlucida	0.601929265	0.001455568	0.091719112	0.96
#N/A	k__Bacteria;p__Proteobacteria;c__Gammaproteobacteria;o__Chromatiales;f__Chromatiaceae;g__Rheinheimera;s__Rheinheimera perlucida	0.601929265	0.001455568	0.091719112	0.96
Monoalkylglycerophosphocholines	k__Bacteria;p__Proteobacteria;c__Gammaproteobacteria;o__Chromatiales;f__Chromatiaceae;g__Rheinheimera;s__Rheinheimera perlucida	0.601929265	0.001455568	0.091719112	0.96
unclassified	k__Bacteria;p__Proteobacteria;c__Gammaproteobacteria;o__Chromatiales;f__Chromatiaceae;g__Rheinheimera;s__Rheinheimera perlucida	0.601929265	0.001455568	0.091719112	0.96
unclassified	k__Bacteria;p__Proteobacteria;c__Gammaproteobacteria;o__Chromatiales;f__Chromatiaceae;g__Rheinheimera;s__Rheinheimera perlucida	0.601929265	0.001455568	0.091719112	0.96
Coumarins and derivatives	k__Bacteria;p__Proteobacteria;c__Gammaproteobacteria;o__Chromatiales;f__Chromatiaceae;g__Rheinheimera;s__Rheinheimera perlucida	0.601929265	0.001455568	0.091719112	0.96
#N/A	k__Bacteria;p__Proteobacteria;c__Gammaproteobacteria;o__Chromatiales;f__Chromatiaceae;g__Rheinheimera;s__Rheinheimera perlucida	0.601929265	0.001455568	0.091719112	0.96
Glycinated bile acids and derivatives	k__Bacteria;p__Proteobacteria;c__Alphaproteobacteria;o__Rhizobiales;f__Phyllobacteriaceae;g__Mesorhizobium;s__Mesorhizobium plurifarium	0.60156611	0.001467817	0.091719112	0.88
Glycinated bile acids and derivatives	k__Bacteria;p__Proteobacteria;c__Alphaproteobacteria;o__Rhodobacterales;f__Rhodobacteraceae;g__Thalassobacter;s__Thalassobacter stenotrophicus	0.60156611	0.001467817	0.091719112	0.88
Glycinated bile acids and derivatives	k__Bacteria;p__Proteobacteria;c__Alphaproteobacteria;o__Rhizobiales;f__Phyllobacteriaceae;g__Mesorhizobium;s__Mesorhizobium plurifarium	0.60156611	0.001467817	0.091719112	0.88
Glycinated bile acids and derivatives	k__Bacteria;p__Proteobacteria;c__Alphaproteobacteria;o__Rhodobacterales;f__Rhodobacteraceae;g__Thalassobacter;s__Thalassobacter stenotrophicus	0.60156611	0.001467817	0.091719112	0.88
#N/A	k__Bacteria;p__Proteobacteria;c__Alphaproteobacteria;o__Rhizobiales;f__Phyllobacteriaceae;g__Mesorhizobium;s__Mesorhizobium plurifarium	0.60156611	0.001467817	0.091719112	0.88
#N/A	k__Bacteria;p__Proteobacteria;c__Alphaproteobacteria;o__Rhodobacterales;f__Rhodobacteraceae;g__Thalassobacter;s__Thalassobacter stenotrophicus	0.60156611	0.001467817	0.091719112	0.88
unclassified	k__Bacteria;p__Proteobacteria;c__Alphaproteobacteria;o__Rhizobiales;f__Phyllobacteriaceae;g__Mesorhizobium;s__Mesorhizobium plurifarium	0.60156611	0.001467817	0.091719112	0.88
unclassified	k__Bacteria;p__Proteobacteria;c__Alphaproteobacteria;o__Rhodobacterales;f__Rhodobacteraceae;g__Thalassobacter;s__Thalassobacter stenotrophicus	0.60156611	0.001467817	0.091719112	0.88
unclassified	k__Bacteria;p__Proteobacteria;c__Betaproteobacteria;o__Neisseriales;f__Neisseriaceae;g__Neisseria;s__Neisseria lactamica	0.60156611	0.001467817	0.091719112	0.96
unclassified	k__Bacteria;p__Proteobacteria;c__Betaproteobacteria;o__Neisseriales;f__Neisseriaceae;g__Neisseria;s__Neisseria elongata;t__Neisseria elongata subsp. glycolytica	0.60156611	0.001467817	0.091719112	0.96
unclassified	k__Bacteria;p__Proteobacteria;c__Betaproteobacteria;o__Neisseriales;f__Neisseriaceae;g__Kingella;s__Kingella denitrificans	0.60156611	0.001467817	0.091719112	0.96
unclassified	k__Bacteria;p__Proteobacteria;c__Alphaproteobacteria;o__Rhizobiales;f__Phyllobacteriaceae;g__Mesorhizobium;s__Mesorhizobium plurifarium	0.60156611	0.001467817	0.091719112	0.88
unclassified	k__Bacteria;p__Proteobacteria;c__Alphaproteobacteria;o__Rhodobacterales;f__Rhodobacteraceae;g__Thalassobacter;s__Thalassobacter stenotrophicus	0.60156611	0.001467817	0.091719112	0.88
#N/A	k__Bacteria;p__Proteobacteria;c__Betaproteobacteria;o__Neisseriales;f__Neisseriaceae;g__Neisseria;s__Neisseria lactamica	0.60156611	0.001467817	0.091719112	0.96
#N/A	k__Bacteria;p__Proteobacteria;c__Betaproteobacteria;o__Neisseriales;f__Neisseriaceae;g__Neisseria;s__Neisseria elongata;t__Neisseria elongata subsp. glycolytica	0.60156611	0.001467817	0.091719112	0.96
#N/A	k__Bacteria;p__Proteobacteria;c__Betaproteobacteria;o__Neisseriales;f__Neisseriaceae;g__Kingella;s__Kingella denitrificans	0.60156611	0.001467817	0.091719112	0.96
unclassified	k__Bacteria;p__Proteobacteria;c__Betaproteobacteria;o__Neisseriales;f__Neisseriaceae;g__Neisseria;s__Neisseria lactamica	0.60156611	0.001467817	0.091719112	0.96
unclassified	k__Bacteria;p__Proteobacteria;c__Betaproteobacteria;o__Neisseriales;f__Neisseriaceae;g__Neisseria;s__Neisseria elongata;t__Neisseria elongata subsp. glycolytica	0.60156611	0.001467817	0.091719112	0.96
unclassified	k__Bacteria;p__Proteobacteria;c__Betaproteobacteria;o__Neisseriales;f__Neisseriaceae;g__Kingella;s__Kingella denitrificans	0.60156611	0.001467817	0.091719112	0.96
#N/A	k__Bacteria;p__Proteobacteria;c__Alphaproteobacteria;o__Rhizobiales;f__Phyllobacteriaceae;g__Mesorhizobium;s__Mesorhizobium plurifarium	0.60156611	0.001467817	0.091719112	0.88
#N/A	k__Bacteria;p__Proteobacteria;c__Alphaproteobacteria;o__Rhodobacterales;f__Rhodobacteraceae;g__Thalassobacter;s__Thalassobacter stenotrophicus	0.60156611	0.001467817	0.091719112	0.88
unclassified	k__Bacteria;p__Proteobacteria;c__Alphaproteobacteria;o__Rhizobiales;f__Phyllobacteriaceae;g__Mesorhizobium;s__Mesorhizobium plurifarium	0.60156611	0.001467817	0.091719112	0.88
unclassified	k__Bacteria;p__Proteobacteria;c__Alphaproteobacteria;o__Rhodobacterales;f__Rhodobacteraceae;g__Thalassobacter;s__Thalassobacter stenotrophicus	0.60156611	0.001467817	0.091719112	0.88
unclassified	k__Bacteria;p__Proteobacteria;c__Alphaproteobacteria;o__Rhizobiales;f__Phyllobacteriaceae;g__Mesorhizobium;s__Mesorhizobium plurifarium	0.60156611	0.001467817	0.091719112	0.88
unclassified	k__Bacteria;p__Proteobacteria;c__Alphaproteobacteria;o__Rhodobacterales;f__Rhodobacteraceae;g__Thalassobacter;s__Thalassobacter stenotrophicus	0.60156611	0.001467817	0.091719112	0.88
Phenylacetamides	k__Bacteria;p__Proteobacteria;c__Betaproteobacteria;o__Neisseriales;f__Neisseriaceae;g__Neisseria;s__Neisseria lactamica	0.60156611	0.001467817	0.091719112	0.96
Phenylacetamides	k__Bacteria;p__Proteobacteria;c__Betaproteobacteria;o__Neisseriales;f__Neisseriaceae;g__Neisseria;s__Neisseria elongata;t__Neisseria elongata subsp. glycolytica	0.60156611	0.001467817	0.091719112	0.96
Phenylacetamides	k__Bacteria;p__Proteobacteria;c__Betaproteobacteria;o__Neisseriales;f__Neisseriaceae;g__Kingella;s__Kingella denitrificans	0.60156611	0.001467817	0.091719112	0.96
Alpha amino acids	k__Bacteria;p__Proteobacteria;c__Alphaproteobacteria;o__Rhizobiales;f__Phyllobacteriaceae;g__Mesorhizobium;s__Mesorhizobium plurifarium	0.60156611	0.001467817	0.091719112	0.88
Alpha amino acids	k__Bacteria;p__Proteobacteria;c__Alphaproteobacteria;o__Rhodobacterales;f__Rhodobacteraceae;g__Thalassobacter;s__Thalassobacter stenotrophicus	0.60156611	0.001467817	0.091719112	0.88
Monohydroxy bile acids, alcohols and derivatives	k__Bacteria;p__Proteobacteria;c__Alphaproteobacteria;o__Rhizobiales;f__Phyllobacteriaceae;g__Mesorhizobium;s__Mesorhizobium plurifarium	0.60156611	0.001467817	0.091719112	0.88
Monohydroxy bile acids, alcohols and derivatives	k__Bacteria;p__Proteobacteria;c__Alphaproteobacteria;o__Rhodobacterales;f__Rhodobacteraceae;g__Thalassobacter;s__Thalassobacter stenotrophicus	0.60156611	0.001467817	0.091719112	0.88
unclassified	k__Bacteria;p__Proteobacteria;c__Alphaproteobacteria;o__Rhizobiales;f__Phyllobacteriaceae;g__Mesorhizobium;s__Mesorhizobium plurifarium	0.60156611	0.001467817	0.091719112	0.88
unclassified	k__Bacteria;p__Proteobacteria;c__Alphaproteobacteria;o__Rhodobacterales;f__Rhodobacteraceae;g__Thalassobacter;s__Thalassobacter stenotrophicus	0.60156611	0.001467817	0.091719112	0.88
Monohydroxy bile acids, alcohols and derivatives	k__Bacteria;p__Proteobacteria;c__Alphaproteobacteria;o__Rhizobiales;f__Phyllobacteriaceae;g__Mesorhizobium;s__Mesorhizobium plurifarium	0.60156611	0.001467817	0.091719112	0.88
Monohydroxy bile acids, alcohols and derivatives	k__Bacteria;p__Proteobacteria;c__Alphaproteobacteria;o__Rhodobacterales;f__Rhodobacteraceae;g__Thalassobacter;s__Thalassobacter stenotrophicus	0.60156611	0.001467817	0.091719112	0.88
N-alkylpyrrolidines	k__Bacteria;p__Proteobacteria;c__Betaproteobacteria;o__Neisseriales;f__Neisseriaceae;g__Neisseria;s__Neisseria lactamica	0.60156611	0.001467817	0.091719112	0.96
N-alkylpyrrolidines	k__Bacteria;p__Proteobacteria;c__Betaproteobacteria;o__Neisseriales;f__Neisseriaceae;g__Neisseria;s__Neisseria elongata;t__Neisseria elongata subsp. glycolytica	0.60156611	0.001467817	0.091719112	0.96
N-alkylpyrrolidines	k__Bacteria;p__Proteobacteria;c__Betaproteobacteria;o__Neisseriales;f__Neisseriaceae;g__Kingella;s__Kingella denitrificans	0.60156611	0.001467817	0.091719112	0.96
#N/A	k__Bacteria;p__Proteobacteria;c__Alphaproteobacteria;o__Rhizobiales;f__Phyllobacteriaceae;g__Mesorhizobium;s__Mesorhizobium plurifarium	0.60156611	0.001467817	0.091719112	0.88
#N/A	k__Bacteria;p__Proteobacteria;c__Alphaproteobacteria;o__Rhodobacterales;f__Rhodobacteraceae;g__Thalassobacter;s__Thalassobacter stenotrophicus	0.60156611	0.001467817	0.091719112	0.88
unclassified	k__Bacteria;p__Proteobacteria;c__Betaproteobacteria;o__Neisseriales;f__Neisseriaceae;g__Neisseria;s__Neisseria lactamica	0.60156611	0.001467817	0.091719112	0.96
unclassified	k__Bacteria;p__Proteobacteria;c__Betaproteobacteria;o__Neisseriales;f__Neisseriaceae;g__Neisseria;s__Neisseria elongata;t__Neisseria elongata subsp. glycolytica	0.60156611	0.001467817	0.091719112	0.96
unclassified	k__Bacteria;p__Proteobacteria;c__Betaproteobacteria;o__Neisseriales;f__Neisseriaceae;g__Kingella;s__Kingella denitrificans	0.60156611	0.001467817	0.091719112	0.96
Oligopeptides	k__Bacteria;p__Proteobacteria;c__Betaproteobacteria;o__Neisseriales;f__Neisseriaceae;g__Neisseria;s__Neisseria lactamica	0.60156611	0.001467817	0.091719112	0.96
Oligopeptides	k__Bacteria;p__Proteobacteria;c__Betaproteobacteria;o__Neisseriales;f__Neisseriaceae;g__Neisseria;s__Neisseria elongata;t__Neisseria elongata subsp. glycolytica	0.60156611	0.001467817	0.091719112	0.96
Oligopeptides	k__Bacteria;p__Proteobacteria;c__Betaproteobacteria;o__Neisseriales;f__Neisseriaceae;g__Kingella;s__Kingella denitrificans	0.60156611	0.001467817	0.091719112	0.96
unclassified	k__Bacteria;p__Proteobacteria;c__Betaproteobacteria;o__Neisseriales;f__Neisseriaceae;g__Neisseria;s__Neisseria lactamica	0.60156611	0.001467817	0.091719112	0.96
unclassified	k__Bacteria;p__Proteobacteria;c__Betaproteobacteria;o__Neisseriales;f__Neisseriaceae;g__Neisseria;s__Neisseria elongata;t__Neisseria elongata subsp. glycolytica	0.60156611	0.001467817	0.091719112	0.96
unclassified	k__Bacteria;p__Proteobacteria;c__Betaproteobacteria;o__Neisseriales;f__Neisseriaceae;g__Kingella;s__Kingella denitrificans	0.60156611	0.001467817	0.091719112	0.96
unclassified	k__Bacteria;p__Proteobacteria;c__Betaproteobacteria;o__Neisseriales;f__Neisseriaceae;g__Neisseria;s__Neisseria lactamica	0.60156611	0.001467817	0.091719112	0.96
unclassified	k__Bacteria;p__Proteobacteria;c__Betaproteobacteria;o__Neisseriales;f__Neisseriaceae;g__Neisseria;s__Neisseria elongata;t__Neisseria elongata subsp. glycolytica	0.60156611	0.001467817	0.091719112	0.96
unclassified	k__Bacteria;p__Proteobacteria;c__Betaproteobacteria;o__Neisseriales;f__Neisseriaceae;g__Kingella;s__Kingella denitrificans	0.60156611	0.001467817	0.091719112	0.96
unclassified	k__Bacteria;p__Proteobacteria;c__Betaproteobacteria;o__Neisseriales;f__Neisseriaceae;g__Neisseria;s__Neisseria lactamica	0.60156611	0.001467817	0.091719112	0.96
unclassified	k__Bacteria;p__Proteobacteria;c__Betaproteobacteria;o__Neisseriales;f__Neisseriaceae;g__Neisseria;s__Neisseria elongata;t__Neisseria elongata subsp. glycolytica	0.60156611	0.001467817	0.091719112	0.96
unclassified	k__Bacteria;p__Proteobacteria;c__Betaproteobacteria;o__Neisseriales;f__Neisseriaceae;g__Kingella;s__Kingella denitrificans	0.60156611	0.001467817	0.091719112	0.96
unclassified	k__Bacteria;p__Proteobacteria;c__Betaproteobacteria;o__Neisseriales;f__Neisseriaceae;g__Neisseria;s__Neisseria lactamica	0.60156611	0.001467817	0.091719112	0.96
unclassified	k__Bacteria;p__Proteobacteria;c__Betaproteobacteria;o__Neisseriales;f__Neisseriaceae;g__Neisseria;s__Neisseria elongata;t__Neisseria elongata subsp. glycolytica	0.60156611	0.001467817	0.091719112	0.96
unclassified	k__Bacteria;p__Proteobacteria;c__Betaproteobacteria;o__Neisseriales;f__Neisseriaceae;g__Kingella;s__Kingella denitrificans	0.60156611	0.001467817	0.091719112	0.96
#N/A	k__Bacteria;p__Proteobacteria;c__Betaproteobacteria;o__Neisseriales;f__Neisseriaceae;g__Neisseria;s__Neisseria lactamica	0.60156611	0.001467817	0.091719112	0.96
#N/A	k__Bacteria;p__Proteobacteria;c__Betaproteobacteria;o__Neisseriales;f__Neisseriaceae;g__Neisseria;s__Neisseria elongata;t__Neisseria elongata subsp. glycolytica	0.60156611	0.001467817	0.091719112	0.96
#N/A	k__Bacteria;p__Proteobacteria;c__Betaproteobacteria;o__Neisseriales;f__Neisseriaceae;g__Kingella;s__Kingella denitrificans	0.60156611	0.001467817	0.091719112	0.96
#N/A	k__Bacteria;p__Proteobacteria;c__Betaproteobacteria;o__Neisseriales;f__Neisseriaceae;g__Neisseria;s__Neisseria lactamica	0.60156611	0.001467817	0.091719112	0.96
#N/A	k__Bacteria;p__Proteobacteria;c__Betaproteobacteria;o__Neisseriales;f__Neisseriaceae;g__Neisseria;s__Neisseria elongata;t__Neisseria elongata subsp. glycolytica	0.60156611	0.001467817	0.091719112	0.96
#N/A	k__Bacteria;p__Proteobacteria;c__Betaproteobacteria;o__Neisseriales;f__Neisseriaceae;g__Kingella;s__Kingella denitrificans	0.60156611	0.001467817	0.091719112	0.96
#N/A	k__Bacteria;p__Proteobacteria;c__Gammaproteobacteria;o__Chromatiales;f__Chromatiaceae;g__Rheinheimera;s__Rheinheimera perlucida	0.60108641	0.001484132	0.092560816	0.88
Cerveratrum-type alkaloids	k__Bacteria;p__Proteobacteria;c__Betaproteobacteria;o__Neisseriales;f__Neisseriaceae;g__Neisseria;s__Neisseria lactamica	0.599449825	0.001540969	0.095674125	0.68
Cerveratrum-type alkaloids	k__Bacteria;p__Proteobacteria;c__Betaproteobacteria;o__Neisseriales;f__Neisseriaceae;g__Kingella;s__Kingella denitrificans	0.599449825	0.001540969	0.095674125	0.68
unclassified	k__Bacteria;p__Proteobacteria;c__Betaproteobacteria;o__Neisseriales;f__Neisseriaceae;g__Neisseria;s__Neisseria mucosa	0.599240366	0.001548376	0.09607472	0.84
unclassified	k__Bacteria;p__Proteobacteria;c__Gammaproteobacteria;o__Enterobacterales;f__Yersiniaceae;g__Yersinia;s__Yersinia pestis	0.598923608	0.001559637	0.096713724	0.88
unclassified	k__Bacteria;p__Proteobacteria;c__Gammaproteobacteria;o__Thiotrichales;f__Francisellaceae;g__Francisella;s__Francisella tularensis;t__Francisella tularensis subsp. holarctica	0.594270622	0.001733316	0.105729505	0.72
unclassified	k__Bacteria;p__Proteobacteria;c__Gammaproteobacteria;o__Thiotrichales;f__Francisellaceae;g__Francisella;s__Francisella sp. W12-1067	0.594270622	0.001733316	0.105729505	0.72
Dihydroxy bile acids, alcohols and derivatives	k__Bacteria;p__Proteobacteria;c__Deltaproteobacteria;o__Desulfovibrionales;f__Desulfovibrionaceae;g__Lawsonia;s__Lawsonia intracellularis	0.594242577	0.001734411	0.105784639	0.4
unclassified	k__Bacteria;p__Proteobacteria;c__Deltaproteobacteria;o__Desulfovibrionales;f__Desulfovibrionaceae;g__Lawsonia;s__Lawsonia intracellularis	0.592412991	0.001807143	0.109772871	0.28
#N/A	k__Bacteria;p__Proteobacteria;c__Gammaproteobacteria;o__Thiotrichales;f__Francisellaceae;g__Francisella;s__Francisella tularensis;t__Francisella tularensis subsp. holarctica	0.592207182	0.001815486	0.109893472	0.72
#N/A	k__Bacteria;p__Proteobacteria;c__Gammaproteobacteria;o__Thiotrichales;f__Francisellaceae;g__Francisella;s__Francisella sp. W12-1067	0.592207182	0.001815486	0.109893472	0.72
#N/A	k__Bacteria;p__Proteobacteria;c__Deltaproteobacteria;o__Myxococcales;f__Polyangiaceae;g__Chondromyces;s__Chondromyces apiculatus	0.592207182	0.001815486	0.109893472	0.72
#N/A	k__Bacteria;p__Proteobacteria;c__Gammaproteobacteria;o__Thiotrichales;f__Francisellaceae;g__Francisella;s__Francisella tularensis;t__Francisella tularensis subsp. holarctica	0.592207182	0.001815486	0.109893472	0.72
#N/A	k__Bacteria;p__Proteobacteria;c__Gammaproteobacteria;o__Thiotrichales;f__Francisellaceae;g__Francisella;s__Francisella sp. W12-1067	0.592207182	0.001815486	0.109893472	0.72
Dihydroxy bile acids, alcohols and derivatives	k__Bacteria;p__Proteobacteria;c__Deltaproteobacteria;o__Desulfovibrionales;f__Desulfovibrionaceae;g__Lawsonia;s__Lawsonia intracellularis	0.592155573	0.001817583	0.109996344	0.4
unclassified	k__Bacteria;p__Proteobacteria;c__Betaproteobacteria;o__Neisseriales;f__Neisseriaceae;g__Neisseria;s__Neisseria lactamica	0.590470446	0.001887209	0.113145404	0.88
unclassified	k__Bacteria;p__Proteobacteria;c__Betaproteobacteria;o__Neisseriales;f__Neisseriaceae;g__Kingella;s__Kingella denitrificans	0.590470446	0.001887209	0.113145404	0.88
#N/A	k__Bacteria;p__Proteobacteria;c__Betaproteobacteria;o__Neisseriales;f__Neisseriaceae;g__Neisseria;s__Neisseria lactamica	0.589922463	0.001910337	0.113804262	0.84
#N/A	k__Bacteria;p__Proteobacteria;c__Betaproteobacteria;o__Neisseriales;f__Neisseriaceae;g__Neisseria;s__Neisseria elongata;t__Neisseria elongata subsp. glycolytica	0.589922463	0.001910337	0.113804262	0.84
#N/A	k__Bacteria;p__Proteobacteria;c__Betaproteobacteria;o__Neisseriales;f__Neisseriaceae;g__Kingella;s__Kingella denitrificans	0.589922463	0.001910337	0.113804262	0.84
#N/A	k__Bacteria;p__Proteobacteria;c__Betaproteobacteria;o__Rhodocyclales;f__Rhodocyclaceae;g__;s__Rhodocyclaceae bacterium Paddy-1	0.589481772	0.001929112	0.114749725	0.88
#N/A	k__Bacteria;p__Proteobacteria;c__Betaproteobacteria;o__Rhodocyclales;f__Rhodocyclaceae;g__;s__Rhodocyclaceae bacterium Paddy-1	0.589481772	0.001929112	0.114749725	0.88
unclassified	k__Bacteria;p__Proteobacteria;c__Deltaproteobacteria;o__Desulfovibrionales;f__Desulfovibrionaceae;g__Lawsonia;s__Lawsonia intracellularis	0.58942876	0.001931381	0.114878522	0.28
#N/A	k__Bacteria;p__Proteobacteria;c__Gammaproteobacteria;o__Thiotrichales;f__Francisellaceae;g__Francisella;s__Francisella tularensis;t__Francisella tularensis subsp. holarctica	0.58927421	0.001938009	0.114939078	0.8
#N/A	k__Bacteria;p__Proteobacteria;c__Gammaproteobacteria;o__Thiotrichales;f__Francisellaceae;g__Francisella;s__Francisella sp. W12-1067	0.58927421	0.001938009	0.114939078	0.8
unclassified	k__Bacteria;p__Proteobacteria;c__Gammaproteobacteria;o__Chromatiales;f__Chromatiaceae;g__Rheinheimera;s__Rheinheimera perlucida	0.588412901	0.001975306	0.116852036	0.88
unclassified	k__Bacteria;p__Proteobacteria;c__Gammaproteobacteria;o__Chromatiales;f__Chromatiaceae;g__Rheinheimera;s__Rheinheimera perlucida	0.588412901	0.001975306	0.116852036	0.88
unclassified	k__Bacteria;p__Proteobacteria;c__Deltaproteobacteria;o__Desulfovibrionales;f__Desulfovibrionaceae;g__Lawsonia;s__Lawsonia intracellularis	0.588066539	0.001990477	0.117697484	0.84
unclassified	k__Bacteria;p__Proteobacteria;c__Betaproteobacteria;o__Neisseriales;f__Neisseriaceae;g__Neisseria;s__Neisseria lactamica	0.587788928	0.002002708	0.117954191	0.84
unclassified	k__Bacteria;p__Proteobacteria;c__Betaproteobacteria;o__Neisseriales;f__Neisseriaceae;g__Neisseria;s__Neisseria elongata;t__Neisseria elongata subsp. glycolytica	0.587788928	0.002002708	0.117954191	0.84
unclassified	k__Bacteria;p__Proteobacteria;c__Betaproteobacteria;o__Neisseriales;f__Neisseriaceae;g__Kingella;s__Kingella denitrificans	0.587788928	0.002002708	0.117954191	0.84
Bile acids, alcohols and derivatives	k__Bacteria;p__Proteobacteria;c__Betaproteobacteria;o__Neisseriales;f__Neisseriaceae;g__Neisseria;s__Neisseria lactamica	0.587788928	0.002002708	0.117954191	0.84
Bile acids, alcohols and derivatives	k__Bacteria;p__Proteobacteria;c__Betaproteobacteria;o__Neisseriales;f__Neisseriaceae;g__Neisseria;s__Neisseria elongata;t__Neisseria elongata subsp. glycolytica	0.587788928	0.002002708	0.117954191	0.84
Bile acids, alcohols and derivatives	k__Bacteria;p__Proteobacteria;c__Betaproteobacteria;o__Neisseriales;f__Neisseriaceae;g__Kingella;s__Kingella denitrificans	0.587788928	0.002002708	0.117954191	0.84
unclassified	k__Bacteria;p__Proteobacteria;c__Gammaproteobacteria;o__Pasteurellales;f__Pasteurellaceae;g__Mannheimia;s__Mannheimia haemolytica	0.587695272	0.002006848	0.118179197	0.84
#N/A	k__Bacteria;p__Proteobacteria;c__Deltaproteobacteria;o__Myxococcales;f__Polyangiaceae;g__Chondromyces;s__Chondromyces apiculatus	0.58693582	0.002040697	0.1196883	0.8
#N/A	k__Bacteria;p__Proteobacteria;c__Betaproteobacteria;o__Burkholderiales;f__Comamonadaceae;g__Delftia;s__Delftia acidovorans	0.586015772	0.002082356	0.121918351	0.88
Long-chain fatty acids	k__Bacteria;p__Proteobacteria;c__Betaproteobacteria;o__Burkholderiales;f__Comamonadaceae;g__Delftia;s__Delftia acidovorans	0.585743539	0.002094821	0.122194477	0.8
unclassified	k__Bacteria;p__Proteobacteria;c__Betaproteobacteria;o__Neisseriales;f__Neisseriaceae;g__Neisseria;s__Neisseria lactamica	0.583826305	0.002184427	0.126568173	0.68
unclassified	k__Bacteria;p__Proteobacteria;c__Betaproteobacteria;o__Neisseriales;f__Neisseriaceae;g__Kingella;s__Kingella denitrificans	0.583826305	0.002184427	0.126568173	0.68
unclassified	k__Bacteria;p__Proteobacteria;c__Gammaproteobacteria;o__Pasteurellales;f__Pasteurellaceae;g__Mannheimia;s__Mannheimia haemolytica	0.582356495	0.002255319	0.130186815	0.72
#N/A	k__Bacteria;p__Proteobacteria;c__Gammaproteobacteria;o__Thiotrichales;f__Francisellaceae;g__Francisella;s__Francisella tularensis;t__Francisella tularensis subsp. holarctica	0.582259041	0.002260088	0.130186815	0.8
#N/A	k__Bacteria;p__Proteobacteria;c__Gammaproteobacteria;o__Thiotrichales;f__Francisellaceae;g__Francisella;s__Francisella sp. W12-1067	0.582259041	0.002260088	0.130186815	0.8
unclassified	k__Bacteria;p__Proteobacteria;c__Deltaproteobacteria;o__Desulfovibrionales;f__Desulfovibrionaceae;g__Lawsonia;s__Lawsonia intracellularis	0.582244098	0.00226082	0.130186815	0.84
Cerveratrum-type alkaloids	k__Bacteria;p__Proteobacteria;c__Betaproteobacteria;o__Neisseriales;f__Neisseriaceae;g__Neisseria;s__Neisseria elongata;t__Neisseria elongata subsp. glycolytica	0.580537142	0.002345783	0.134410869	0.68
Dipeptides	k__Bacteria;p__Proteobacteria;c__Betaproteobacteria;o__Burkholderiales;f__Comamonadaceae;g__Ottowia;s__Ottowia thiooxydans	0.580149101	0.002365473	0.135384819	0.92
unclassified	k__Bacteria;p__Proteobacteria;c__Deltaproteobacteria;o__Myxococcales;f__Polyangiaceae;g__Chondromyces;s__Chondromyces apiculatus	0.579920651	0.00237713	0.135722035	0.8
unclassified	k__Bacteria;p__Proteobacteria;c__Deltaproteobacteria;o__Desulfovibrionales;f__Desulfovibrionaceae;g__Lawsonia;s__Lawsonia intracellularis	0.579897904	0.002378294	0.135781455	0.84
Acetamides	k__Bacteria;p__Proteobacteria;c__Gammaproteobacteria;o__Pasteurellales;f__Pasteurellaceae;g__Haemophilus;s__Haemophilus sputorum	0.575865579	0.002592366	0.146374262	0.68
unclassified	k__Bacteria;p__Proteobacteria;c__Gammaproteobacteria;o__Thiotrichales;f__Francisellaceae;g__Francisella;s__Francisella tularensis;t__Francisella tularensis subsp. holarctica	0.573585382	0.002720528	0.151994578	0.76
unclassified	k__Bacteria;p__Proteobacteria;c__Gammaproteobacteria;o__Thiotrichales;f__Francisellaceae;g__Francisella;s__Francisella sp. W12-1067	0.573585382	0.002720528	0.151994578	0.76
unclassified	k__Bacteria;p__Proteobacteria;c__Gammaproteobacteria;o__Chromatiales;f__Chromatiaceae;g__Rheinheimera;s__Rheinheimera perlucida	0.573200004	0.002742713	0.153025393	0.84
unclassified	k__Bacteria;p__Proteobacteria;c__Gammaproteobacteria;o__Chromatiales;f__Chromatiaceae;g__Rheinheimera;s__Rheinheimera perlucida	0.573200004	0.002742713	0.153025393	0.84
Xanthines	k__Bacteria;p__Proteobacteria;c__Betaproteobacteria;o__Neisseriales;f__Neisseriaceae;g__Neisseria;s__Neisseria mucosa	0.573131169	0.002746692	0.153224202	0.92
unclassified	k__Bacteria;p__Proteobacteria;c__Betaproteobacteria;o__Neisseriales;f__Neisseriaceae;g__Neisseria;s__Neisseria mucosa	0.573131169	0.002746692	0.153224202	0.92
unclassified	k__Bacteria;p__Proteobacteria;c__Betaproteobacteria;o__Neisseriales;f__Neisseriaceae;g__Neisseria;s__Neisseria elongata;t__Neisseria elongata subsp. glycolytica	0.573073621	0.002750022	0.153348115	0.64
unclassified	k__Bacteria;p__Proteobacteria;c__Deltaproteobacteria;o__Desulfovibrionales;f__Desulfovibrionaceae;g__Lawsonia;s__Lawsonia intracellularis	0.572782631	0.002766914	0.154157931	0.84
unclassified	k__Bacteria;p__Proteobacteria;c__Deltaproteobacteria;o__Desulfovibrionales;f__Desulfovibrionaceae;g__Lawsonia;s__Lawsonia intracellularis	0.572621895	0.002776282	0.154602022	0.84
unclassified	k__Bacteria;p__Proteobacteria;c__Betaproteobacteria;o__Burkholderiales;f__Comamonadaceae;g__Ottowia;s__Ottowia thiooxydans	0.571961513	0.002815055	0.156556283	0.92
Dipeptides	k__Bacteria;p__Proteobacteria;c__Betaproteobacteria;o__Burkholderiales;f__Comamonadaceae;g__Ottowia;s__Ottowia thiooxydans	0.571567115	0.00283843	0.157701711	0.56
#N/A	k__Bacteria;p__Proteobacteria;c__Gammaproteobacteria;o__Thiotrichales;f__Francisellaceae;g__Francisella;s__Francisella tularensis;t__Francisella tularensis subsp. holarctica	0.571404449	0.002848119	0.157701711	0.76
#N/A	k__Bacteria;p__Proteobacteria;c__Gammaproteobacteria;o__Thiotrichales;f__Francisellaceae;g__Francisella;s__Francisella sp. W12-1067	0.571404449	0.002848119	0.157701711	0.76
#N/A	k__Bacteria;p__Proteobacteria;c__Deltaproteobacteria;o__Desulfovibrionales;f__Desulfovibrionaceae;g__Lawsonia;s__Lawsonia intracellularis	0.571327021	0.002852741	0.157921806	0.84
#N/A	k__Bacteria;p__Proteobacteria;c__Deltaproteobacteria;o__Desulfovibrionales;f__Desulfovibrionaceae;g__Lawsonia;s__Lawsonia intracellularis	0.571327021	0.002852741	0.157921806	0.84
#N/A	k__Bacteria;p__Proteobacteria;c__Deltaproteobacteria;o__Desulfovibrionales;f__Desulfovibrionaceae;g__Lawsonia;s__Lawsonia intracellularis	0.571166693	0.002862331	0.158401734	0.84
#N/A	k__Bacteria;p__Proteobacteria;c__Deltaproteobacteria;o__Desulfovibrionales;f__Desulfovibrionaceae;g__Lawsonia;s__Lawsonia intracellularis	0.571166693	0.002862331	0.158401734	0.84
unclassified	k__Bacteria;p__Proteobacteria;c__Betaproteobacteria;o__Neisseriales;f__Neisseriaceae;g__Neisseria;s__Neisseria lactamica	0.570699976	0.002890406	0.159735084	0.52
unclassified	k__Bacteria;p__Proteobacteria;c__Betaproteobacteria;o__Neisseriales;f__Neisseriaceae;g__Kingella;s__Kingella denitrificans	0.570699976	0.002890406	0.159735084	0.52
Dihydroxy bile acids, alcohols and derivatives	k__Bacteria;p__Proteobacteria;c__Gammaproteobacteria;o__Thiotrichales;f__Francisellaceae;g__Francisella;s__Francisella tularensis;t__Francisella tularensis subsp. holarctica	0.569509346	0.002963088	0.162929762	0.72
Dihydroxy bile acids, alcohols and derivatives	k__Bacteria;p__Proteobacteria;c__Gammaproteobacteria;o__Thiotrichales;f__Francisellaceae;g__Francisella;s__Francisella sp. W12-1067	0.569509346	0.002963088	0.162929762	0.72
unclassified	k__Bacteria;p__Proteobacteria;c__Betaproteobacteria;o__Rhodocyclales;f__Rhodocyclaceae;g__;s__Rhodocyclaceae bacterium Paddy-1	0.569477559	0.002965049	0.163021414	0.76
Dipeptides	k__Bacteria;p__Proteobacteria;c__Betaproteobacteria;o__Burkholderiales;f__Comamonadaceae;g__Ottowia;s__Ottowia thiooxydans	0.568635176	0.003017435	0.165070925	0.76
unclassified	k__Bacteria;p__Proteobacteria;c__Betaproteobacteria;o__Burkholderiales;f__Comamonadaceae;g__Ottowia;s__Ottowia thiooxydans	0.568452547	0.003028896	0.165632044	0.92
#N/A	k__Bacteria;p__Proteobacteria;c__Deltaproteobacteria;o__Desulfovibrionales;f__Desulfovibrionaceae;g__Lawsonia;s__Lawsonia intracellularis	0.567707515	0.003076033	0.167458987	0.92
unclassified	k__Bacteria;p__Proteobacteria;c__Gammaproteobacteria;o__Chromatiales;f__Chromatiaceae;g__Rheinheimera;s__Rheinheimera perlucida	0.567535449	0.003087008	0.167982045	0.76
Dihydroxy bile acids, alcohols and derivatives	k__Bacteria;p__Proteobacteria;c__Gammaproteobacteria;o__Pasteurellales;f__Pasteurellaceae;g__Mannheimia;s__Mannheimia haemolytica	0.567289186	0.003102772	0.168698836	0.84
#N/A	k__Bacteria;p__Proteobacteria;c__Deltaproteobacteria;o__Desulfovibrionales;f__Desulfovibrionaceae;g__Lawsonia;s__Lawsonia intracellularis	0.566561163	0.003149778	0.170937382	0.92
Pyridinecarboxylic acids	k__Bacteria;p__Proteobacteria;c__Betaproteobacteria;o__Neisseriales;f__Neisseriaceae;g__Neisseria;s__Neisseria mucosa	0.566476145	0.003155307	0.171193367	0.84
unclassified	k__Bacteria;p__Proteobacteria;c__Gammaproteobacteria;o__Thiotrichales;f__Francisellaceae;g__Francisella;s__Francisella tularensis;t__Francisella tularensis subsp. holarctica	0.566243495	0.003170477	0.171662892	0.68
unclassified	k__Bacteria;p__Proteobacteria;c__Gammaproteobacteria;o__Thiotrichales;f__Francisellaceae;g__Francisella;s__Francisella sp. W12-1067	0.566243495	0.003170477	0.171662892	0.68
unclassified	k__Bacteria;p__Proteobacteria;c__Betaproteobacteria;o__Burkholderiales;f__Alcaligenaceae;g__Oligella;s__Oligella ureolytica	0.56571739	0.003205013	0.173229509	0.76
unclassified	k__Bacteria;p__Proteobacteria;c__Gammaproteobacteria;o__Thiotrichales;f__Francisellaceae;g__Francisella;s__Francisella tularensis;t__Francisella tularensis subsp. holarctica	0.565382467	0.003227164	0.173957413	0.72
unclassified	k__Bacteria;p__Proteobacteria;c__Gammaproteobacteria;o__Thiotrichales;f__Francisellaceae;g__Francisella;s__Francisella sp. W12-1067	0.565382467	0.003227164	0.173957413	0.72
Tryptamines and derivatives	k__Bacteria;p__Proteobacteria;c__Deltaproteobacteria;o__Myxococcales;f__Polyangiaceae;g__Chondromyces;s__Chondromyces apiculatus	0.565382467	0.003227164	0.173957413	0.72
unclassified	k__Bacteria;p__Proteobacteria;c__Deltaproteobacteria;o__Desulfovibrionales;f__Desulfovibrionaceae;g__Lawsonia;s__Lawsonia intracellularis	0.563890684	0.003327415	0.178505073	0.84
Triterpenoids	k__Bacteria;p__Proteobacteria;c__Deltaproteobacteria;o__Desulfovibrionales;f__Desulfovibrionaceae;g__Lawsonia;s__Lawsonia intracellularis	0.563557753	0.003350145	0.179423906	0.72
Hydroxyindoles	k__Bacteria;p__Proteobacteria;c__Betaproteobacteria;o__Burkholderiales;f__Comamonadaceae;g__Delftia;s__Delftia acidovorans	0.563495713	0.003354396	0.179625451	0.8
unclassified	k__Bacteria;p__Proteobacteria;c__Betaproteobacteria;o__Rhodocyclales;f__Rhodocyclaceae;g__;s__Rhodocyclaceae bacterium Paddy-1	0.561409034	0.003500041	0.184697993	0.84
unclassified	k__Bacteria;p__Proteobacteria;c__Betaproteobacteria;o__Rhodocyclales;f__Rhodocyclaceae;g__;s__Rhodocyclaceae bacterium Paddy-1	0.561409034	0.003500041	0.184697993	0.84
#N/A	k__Bacteria;p__Proteobacteria;c__Betaproteobacteria;o__Burkholderiales;f__Comamonadaceae;g__Delftia;s__Delftia acidovorans	0.560367113	0.003574749	0.187743154	0.8
#N/A	k__Bacteria;p__Proteobacteria;c__Gammaproteobacteria;o__Chromatiales;f__Chromatiaceae;g__Rheinheimera;s__Rheinheimera perlucida	0.559444882	0.003641999	0.190457068	0.88
Bile acids, alcohols and derivatives	k__Bacteria;p__Proteobacteria;c__Betaproteobacteria;o__Neisseriales;f__Neisseriaceae;g__Neisseria;s__Neisseria lactamica	0.558013595	0.003748491	0.190457068	0.64
Bile acids, alcohols and derivatives	k__Bacteria;p__Proteobacteria;c__Betaproteobacteria;o__Neisseriales;f__Neisseriaceae;g__Kingella;s__Kingella denitrificans	0.558013595	0.003748491	0.190457068	0.64
unclassified	k__Bacteria;p__Proteobacteria;c__Betaproteobacteria;o__Neisseriales;f__Neisseriaceae;g__Neisseria;s__Neisseria elongata;t__Neisseria elongata subsp. glycolytica	0.557919436	0.003755588	0.190457068	0.84
#N/A	k__Bacteria;p__Proteobacteria;c__Betaproteobacteria;o__Neisseriales;f__Neisseriaceae;g__Neisseria;s__Neisseria lactamica	0.557901086	0.003756972	0.190457068	0.88
#N/A	k__Bacteria;p__Proteobacteria;c__Betaproteobacteria;o__Neisseriales;f__Neisseriaceae;g__Kingella;s__Kingella denitrificans	0.557901086	0.003756972	0.190457068	0.88
unclassified	k__Bacteria;p__Proteobacteria;c__Betaproteobacteria;o__Neisseriales;f__Neisseriaceae;g__Neisseria;s__Neisseria elongata;t__Neisseria elongata subsp. glycolytica	0.557901086	0.003756972	0.190457068	0.88
Beta amino acids and derivatives	k__Bacteria;p__Proteobacteria;c__Deltaproteobacteria;o__Desulfovibrionales;f__Desulfovibrionaceae;g__Lawsonia;s__Lawsonia intracellularis	0.557690416	0.003772897	0.190457068	0.72
#N/A	k__Bacteria;p__Proteobacteria;c__Gammaproteobacteria;o__Enterobacterales;f__Yersiniaceae;g__Yersinia;s__Yersinia pestis	0.55747061	0.003789574	0.190457068	0.92
unclassified	k__Bacteria;p__Proteobacteria;c__Gammaproteobacteria;o__Enterobacterales;f__Yersiniaceae;g__Yersinia;s__Yersinia pestis	0.55747061	0.003789574	0.190457068	0.92
unclassified	k__Bacteria;p__Proteobacteria;c__Deltaproteobacteria;o__Myxococcales;f__Polyangiaceae;g__Chondromyces;s__Chondromyces apiculatus	0.556536754	0.003861125	0.190457068	0.8
#N/A	k__Bacteria;p__Proteobacteria;c__Deltaproteobacteria;o__Myxococcales;f__Polyangiaceae;g__Chondromyces;s__Chondromyces apiculatus	0.556536754	0.003861125	0.190457068	0.8
unclassified	k__Bacteria;p__Proteobacteria;c__Betaproteobacteria;o__Burkholderiales;f__Comamonadaceae;g__Ottowia;s__Ottowia thiooxydans	0.556129549	0.00389268	0.190457068	0.84
Trihydroxy bile acids, alcohols and derivatives	k__Bacteria;p__Proteobacteria;c__Gammaproteobacteria;o__Pasteurellales;f__Pasteurellaceae;g__Mannheimia;s__Mannheimia haemolytica	0.556099391	0.003895026	0.190457068	0.88
Triterpenoids	k__Bacteria;p__Proteobacteria;c__Deltaproteobacteria;o__Desulfovibrionales;f__Desulfovibrionaceae;g__Lawsonia;s__Lawsonia intracellularis	0.554894354	0.003989737	0.190457068	0.72
#N/A	k__Bacteria;p__Proteobacteria;c__Gammaproteobacteria;o__Pasteurellales;f__Pasteurellaceae;g__Mannheimia;s__Mannheimia haemolytica	0.55456108	0.004016273	0.190457068	0.88
#N/A	k__Bacteria;p__Proteobacteria;c__Gammaproteobacteria;o__Pasteurellales;f__Pasteurellaceae;g__Mannheimia;s__Mannheimia haemolytica	0.553685129	0.004086729	0.190457068	0.84
Purines and purine derivatives	k__Bacteria;p__Proteobacteria;c__Deltaproteobacteria;o__Desulfovibrionales;f__Desulfovibrionaceae;g__Lawsonia;s__Lawsonia intracellularis	0.553455954	0.004105334	0.190457068	0.88
unclassified	k__Bacteria;p__Proteobacteria;c__Deltaproteobacteria;o__Desulfovibrionales;f__Desulfovibrionaceae;g__Lawsonia;s__Lawsonia intracellularis	0.553455954	0.004105334	0.190457068	0.88
#N/A	k__Bacteria;p__Proteobacteria;c__Betaproteobacteria;o__Rhodocyclales;f__Rhodocyclaceae;g__;s__Rhodocyclaceae bacterium Paddy-1	0.552770798	0.004161385	0.190457068	0.96
unclassified	k__Bacteria;p__Proteobacteria;c__Betaproteobacteria;o__Rhodocyclales;f__Rhodocyclaceae;g__;s__Rhodocyclaceae bacterium Paddy-1	0.552770798	0.004161385	0.190457068	0.96
#N/A	k__Bacteria;p__Proteobacteria;c__Betaproteobacteria;o__Rhodocyclales;f__Rhodocyclaceae;g__;s__Rhodocyclaceae bacterium Paddy-1	0.552770798	0.004161385	0.190457068	0.96
unclassified	k__Bacteria;p__Proteobacteria;c__Betaproteobacteria;o__Rhodocyclales;f__Rhodocyclaceae;g__;s__Rhodocyclaceae bacterium Paddy-1	0.552770798	0.004161385	0.190457068	0.96
unclassified	k__Bacteria;p__Proteobacteria;c__Betaproteobacteria;o__Rhodocyclales;f__Rhodocyclaceae;g__;s__Rhodocyclaceae bacterium Paddy-1	0.552770798	0.004161385	0.190457068	0.96
Curcuminoids	k__Bacteria;p__Proteobacteria;c__Betaproteobacteria;o__Rhodocyclales;f__Rhodocyclaceae;g__;s__Rhodocyclaceae bacterium Paddy-1	0.552770798	0.004161385	0.190457068	0.96
Dialkylamines	k__Bacteria;p__Proteobacteria;c__Betaproteobacteria;o__Rhodocyclales;f__Rhodocyclaceae;g__;s__Rhodocyclaceae bacterium Paddy-1	0.552770798	0.004161385	0.190457068	0.96
unclassified	k__Bacteria;p__Proteobacteria;c__Betaproteobacteria;o__Rhodocyclales;f__Rhodocyclaceae;g__;s__Rhodocyclaceae bacterium Paddy-1	0.552770798	0.004161385	0.190457068	0.96
unclassified	k__Bacteria;p__Proteobacteria;c__Betaproteobacteria;o__Rhodocyclales;f__Rhodocyclaceae;g__;s__Rhodocyclaceae bacterium Paddy-1	0.552770798	0.004161385	0.190457068	0.96
N-acyl amines	k__Bacteria;p__Proteobacteria;c__Betaproteobacteria;o__Rhodocyclales;f__Rhodocyclaceae;g__;s__Rhodocyclaceae bacterium Paddy-1	0.552770798	0.004161385	0.190457068	0.96
#N/A	k__Bacteria;p__Proteobacteria;c__Betaproteobacteria;o__Rhodocyclales;f__Rhodocyclaceae;g__;s__Rhodocyclaceae bacterium Paddy-1	0.552770798	0.004161385	0.190457068	0.96
Phenylpyridines	k__Bacteria;p__Proteobacteria;c__Betaproteobacteria;o__Rhodocyclales;f__Rhodocyclaceae;g__;s__Rhodocyclaceae bacterium Paddy-1	0.552770798	0.004161385	0.190457068	0.96
Bile acids, alcohols and derivatives	k__Bacteria;p__Proteobacteria;c__Betaproteobacteria;o__Rhodocyclales;f__Rhodocyclaceae;g__;s__Rhodocyclaceae bacterium Paddy-1	0.552770798	0.004161385	0.190457068	0.96
Long-chain fatty acids	k__Bacteria;p__Proteobacteria;c__Betaproteobacteria;o__Rhodocyclales;f__Rhodocyclaceae;g__;s__Rhodocyclaceae bacterium Paddy-1	0.552770798	0.004161385	0.190457068	0.96
unclassified	k__Bacteria;p__Proteobacteria;c__Betaproteobacteria;o__Rhodocyclales;f__Rhodocyclaceae;g__;s__Rhodocyclaceae bacterium Paddy-1	0.552770798	0.004161385	0.190457068	0.96
Long-chain fatty acids	k__Bacteria;p__Proteobacteria;c__Betaproteobacteria;o__Rhodocyclales;f__Rhodocyclaceae;g__;s__Rhodocyclaceae bacterium Paddy-1	0.552770798	0.004161385	0.190457068	0.96
unclassified	k__Bacteria;p__Proteobacteria;c__Betaproteobacteria;o__Rhodocyclales;f__Rhodocyclaceae;g__;s__Rhodocyclaceae bacterium Paddy-1	0.552770798	0.004161385	0.190457068	0.96
#N/A	k__Bacteria;p__Proteobacteria;c__Betaproteobacteria;o__Rhodocyclales;f__Rhodocyclaceae;g__;s__Rhodocyclaceae bacterium Paddy-1	0.552770798	0.004161385	0.190457068	0.96
unclassified	k__Bacteria;p__Proteobacteria;c__Betaproteobacteria;o__Rhodocyclales;f__Rhodocyclaceae;g__;s__Rhodocyclaceae bacterium Paddy-1	0.552770798	0.004161385	0.190457068	0.96
unclassified	k__Bacteria;p__Proteobacteria;c__Betaproteobacteria;o__Rhodocyclales;f__Rhodocyclaceae;g__;s__Rhodocyclaceae bacterium Paddy-1	0.552770798	0.004161385	0.190457068	0.96
#N/A	k__Bacteria;p__Proteobacteria;c__Betaproteobacteria;o__Rhodocyclales;f__Rhodocyclaceae;g__;s__Rhodocyclaceae bacterium Paddy-1	0.552770798	0.004161385	0.190457068	0.96
unclassified	k__Bacteria;p__Proteobacteria;c__Betaproteobacteria;o__Rhodocyclales;f__Rhodocyclaceae;g__;s__Rhodocyclaceae bacterium Paddy-1	0.552770798	0.004161385	0.190457068	0.96
Monoalkylglycerophosphocholines	k__Bacteria;p__Proteobacteria;c__Betaproteobacteria;o__Rhodocyclales;f__Rhodocyclaceae;g__;s__Rhodocyclaceae bacterium Paddy-1	0.552770798	0.004161385	0.190457068	0.96
unclassified	k__Bacteria;p__Proteobacteria;c__Betaproteobacteria;o__Rhodocyclales;f__Rhodocyclaceae;g__;s__Rhodocyclaceae bacterium Paddy-1	0.552770798	0.004161385	0.190457068	0.96
unclassified	k__Bacteria;p__Proteobacteria;c__Betaproteobacteria;o__Rhodocyclales;f__Rhodocyclaceae;g__;s__Rhodocyclaceae bacterium Paddy-1	0.552770798	0.004161385	0.190457068	0.96
Coumarins and derivatives	k__Bacteria;p__Proteobacteria;c__Betaproteobacteria;o__Rhodocyclales;f__Rhodocyclaceae;g__;s__Rhodocyclaceae bacterium Paddy-1	0.552770798	0.004161385	0.190457068	0.96
#N/A	k__Bacteria;p__Proteobacteria;c__Betaproteobacteria;o__Rhodocyclales;f__Rhodocyclaceae;g__;s__Rhodocyclaceae bacterium Paddy-1	0.552770798	0.004161385	0.190457068	0.96
unclassified	k__Bacteria;p__Proteobacteria;c__Betaproteobacteria;o__Burkholderiales;f__Comamonadaceae;g__Ottowia;s__Ottowia thiooxydans	0.552530004	0.004181237	0.190457068	0.6
unclassified	k__Bacteria;p__Proteobacteria;c__Gammaproteobacteria;o__Enterobacterales;f__Yersiniaceae;g__Yersinia;s__Yersinia pestis	0.552024178	0.004223199	0.190457068	0.8
unclassified	k__Bacteria;p__Proteobacteria;c__Alphaproteobacteria;o__Rhizobiales;f__Phyllobacteriaceae;g__Mesorhizobium;s__Mesorhizobium plurifarium	0.551435601	0.004272474	0.190457068	0.88
unclassified	k__Bacteria;p__Proteobacteria;c__Alphaproteobacteria;o__Rhodobacterales;f__Rhodobacteraceae;g__Thalassobacter;s__Thalassobacter stenotrophicus	0.551435601	0.004272474	0.190457068	0.88
unclassified	k__Bacteria;p__Proteobacteria;c__Betaproteobacteria;o__Neisseriales;f__Neisseriaceae;g__Neisseria;s__Neisseria lactamica	0.551435601	0.004272474	0.190457068	0.96
unclassified	k__Bacteria;p__Proteobacteria;c__Betaproteobacteria;o__Neisseriales;f__Neisseriaceae;g__Neisseria;s__Neisseria elongata;t__Neisseria elongata subsp. glycolytica	0.551435601	0.004272474	0.190457068	0.96
unclassified	k__Bacteria;p__Proteobacteria;c__Betaproteobacteria;o__Neisseriales;f__Neisseriaceae;g__Kingella;s__Kingella denitrificans	0.551435601	0.004272474	0.190457068	0.96
#N/A	k__Bacteria;p__Proteobacteria;c__Alphaproteobacteria;o__Rhizobiales;f__Phyllobacteriaceae;g__Mesorhizobium;s__Mesorhizobium plurifarium	0.551435601	0.004272474	0.190457068	0.88
#N/A	k__Bacteria;p__Proteobacteria;c__Alphaproteobacteria;o__Rhodobacterales;f__Rhodobacteraceae;g__Thalassobacter;s__Thalassobacter stenotrophicus	0.551435601	0.004272474	0.190457068	0.88
unclassified	k__Bacteria;p__Proteobacteria;c__Alphaproteobacteria;o__Rhizobiales;f__Phyllobacteriaceae;g__Mesorhizobium;s__Mesorhizobium plurifarium	0.551435601	0.004272474	0.190457068	0.88
unclassified	k__Bacteria;p__Proteobacteria;c__Alphaproteobacteria;o__Rhodobacterales;f__Rhodobacteraceae;g__Thalassobacter;s__Thalassobacter stenotrophicus	0.551435601	0.004272474	0.190457068	0.88
unclassified	k__Bacteria;p__Proteobacteria;c__Alphaproteobacteria;o__Rhizobiales;f__Phyllobacteriaceae;g__Mesorhizobium;s__Mesorhizobium plurifarium	0.551435601	0.004272474	0.190457068	0.88
unclassified	k__Bacteria;p__Proteobacteria;c__Alphaproteobacteria;o__Rhodobacterales;f__Rhodobacteraceae;g__Thalassobacter;s__Thalassobacter stenotrophicus	0.551435601	0.004272474	0.190457068	0.88
unclassified	k__Bacteria;p__Proteobacteria;c__Alphaproteobacteria;o__Rhizobiales;f__Phyllobacteriaceae;g__Mesorhizobium;s__Mesorhizobium plurifarium	0.551435601	0.004272474	0.190457068	0.88
unclassified	k__Bacteria;p__Proteobacteria;c__Alphaproteobacteria;o__Rhodobacterales;f__Rhodobacteraceae;g__Thalassobacter;s__Thalassobacter stenotrophicus	0.551435601	0.004272474	0.190457068	0.88
Lineolic acids and derivatives	k__Bacteria;p__Proteobacteria;c__Alphaproteobacteria;o__Rhizobiales;f__Phyllobacteriaceae;g__Mesorhizobium;s__Mesorhizobium plurifarium	0.551435601	0.004272474	0.190457068	0.88
Lineolic acids and derivatives	k__Bacteria;p__Proteobacteria;c__Alphaproteobacteria;o__Rhodobacterales;f__Rhodobacteraceae;g__Thalassobacter;s__Thalassobacter stenotrophicus	0.551435601	0.004272474	0.190457068	0.88
#N/A	k__Bacteria;p__Proteobacteria;c__Alphaproteobacteria;o__Rhizobiales;f__Phyllobacteriaceae;g__Mesorhizobium;s__Mesorhizobium plurifarium	0.551435601	0.004272474	0.190457068	0.88
#N/A	k__Bacteria;p__Proteobacteria;c__Alphaproteobacteria;o__Rhodobacterales;f__Rhodobacteraceae;g__Thalassobacter;s__Thalassobacter stenotrophicus	0.551435601	0.004272474	0.190457068	0.88
unclassified	k__Bacteria;p__Proteobacteria;c__Betaproteobacteria;o__Neisseriales;f__Neisseriaceae;g__Neisseria;s__Neisseria lactamica	0.551435601	0.004272474	0.190457068	0.96
unclassified	k__Bacteria;p__Proteobacteria;c__Betaproteobacteria;o__Neisseriales;f__Neisseriaceae;g__Neisseria;s__Neisseria elongata;t__Neisseria elongata subsp. glycolytica	0.551435601	0.004272474	0.190457068	0.96
unclassified	k__Bacteria;p__Proteobacteria;c__Betaproteobacteria;o__Neisseriales;f__Neisseriaceae;g__Kingella;s__Kingella denitrificans	0.551435601	0.004272474	0.190457068	0.96
N-acyl amines	k__Bacteria;p__Proteobacteria;c__Betaproteobacteria;o__Neisseriales;f__Neisseriaceae;g__Neisseria;s__Neisseria lactamica	0.551435601	0.004272474	0.190457068	0.96
N-acyl amines	k__Bacteria;p__Proteobacteria;c__Betaproteobacteria;o__Neisseriales;f__Neisseriaceae;g__Neisseria;s__Neisseria elongata;t__Neisseria elongata subsp. glycolytica	0.551435601	0.004272474	0.190457068	0.96
N-acyl amines	k__Bacteria;p__Proteobacteria;c__Betaproteobacteria;o__Neisseriales;f__Neisseriaceae;g__Kingella;s__Kingella denitrificans	0.551435601	0.004272474	0.190457068	0.96
#N/A	k__Bacteria;p__Proteobacteria;c__Betaproteobacteria;o__Neisseriales;f__Neisseriaceae;g__Neisseria;s__Neisseria lactamica	0.551435601	0.004272474	0.190457068	0.96
#N/A	k__Bacteria;p__Proteobacteria;c__Betaproteobacteria;o__Neisseriales;f__Neisseriaceae;g__Neisseria;s__Neisseria elongata;t__Neisseria elongata subsp. glycolytica	0.551435601	0.004272474	0.190457068	0.96
#N/A	k__Bacteria;p__Proteobacteria;c__Betaproteobacteria;o__Neisseriales;f__Neisseriaceae;g__Kingella;s__Kingella denitrificans	0.551435601	0.004272474	0.190457068	0.96
Long-chain fatty acids	k__Bacteria;p__Proteobacteria;c__Betaproteobacteria;o__Neisseriales;f__Neisseriaceae;g__Neisseria;s__Neisseria lactamica	0.551435601	0.004272474	0.190457068	0.96
Long-chain fatty acids	k__Bacteria;p__Proteobacteria;c__Betaproteobacteria;o__Neisseriales;f__Neisseriaceae;g__Neisseria;s__Neisseria elongata;t__Neisseria elongata subsp. glycolytica	0.551435601	0.004272474	0.190457068	0.96
Long-chain fatty acids	k__Bacteria;p__Proteobacteria;c__Betaproteobacteria;o__Neisseriales;f__Neisseriaceae;g__Kingella;s__Kingella denitrificans	0.551435601	0.004272474	0.190457068	0.96
unclassified	k__Bacteria;p__Proteobacteria;c__Betaproteobacteria;o__Neisseriales;f__Neisseriaceae;g__Neisseria;s__Neisseria lactamica	0.551435601	0.004272474	0.190457068	0.96
unclassified	k__Bacteria;p__Proteobacteria;c__Betaproteobacteria;o__Neisseriales;f__Neisseriaceae;g__Neisseria;s__Neisseria elongata;t__Neisseria elongata subsp. glycolytica	0.551435601	0.004272474	0.190457068	0.96
unclassified	k__Bacteria;p__Proteobacteria;c__Betaproteobacteria;o__Neisseriales;f__Neisseriaceae;g__Kingella;s__Kingella denitrificans	0.551435601	0.004272474	0.190457068	0.96
Long-chain fatty acids	k__Bacteria;p__Proteobacteria;c__Betaproteobacteria;o__Neisseriales;f__Neisseriaceae;g__Neisseria;s__Neisseria lactamica	0.551435601	0.004272474	0.190457068	0.96
Long-chain fatty acids	k__Bacteria;p__Proteobacteria;c__Betaproteobacteria;o__Neisseriales;f__Neisseriaceae;g__Neisseria;s__Neisseria elongata;t__Neisseria elongata subsp. glycolytica	0.551435601	0.004272474	0.190457068	0.96
Long-chain fatty acids	k__Bacteria;p__Proteobacteria;c__Betaproteobacteria;o__Neisseriales;f__Neisseriaceae;g__Kingella;s__Kingella denitrificans	0.551435601	0.004272474	0.190457068	0.96
unclassified	k__Bacteria;p__Proteobacteria;c__Betaproteobacteria;o__Neisseriales;f__Neisseriaceae;g__Neisseria;s__Neisseria lactamica	0.551435601	0.004272474	0.190457068	0.96
unclassified	k__Bacteria;p__Proteobacteria;c__Betaproteobacteria;o__Neisseriales;f__Neisseriaceae;g__Neisseria;s__Neisseria elongata;t__Neisseria elongata subsp. glycolytica	0.551435601	0.004272474	0.190457068	0.96
unclassified	k__Bacteria;p__Proteobacteria;c__Betaproteobacteria;o__Neisseriales;f__Neisseriaceae;g__Kingella;s__Kingella denitrificans	0.551435601	0.004272474	0.190457068	0.96
unclassified	k__Bacteria;p__Proteobacteria;c__Betaproteobacteria;o__Neisseriales;f__Neisseriaceae;g__Neisseria;s__Neisseria lactamica	0.551435601	0.004272474	0.190457068	0.96
unclassified	k__Bacteria;p__Proteobacteria;c__Betaproteobacteria;o__Neisseriales;f__Neisseriaceae;g__Neisseria;s__Neisseria elongata;t__Neisseria elongata subsp. glycolytica	0.551435601	0.004272474	0.190457068	0.96
unclassified	k__Bacteria;p__Proteobacteria;c__Betaproteobacteria;o__Neisseriales;f__Neisseriaceae;g__Kingella;s__Kingella denitrificans	0.551435601	0.004272474	0.190457068	0.96
#N/A	k__Bacteria;p__Proteobacteria;c__Betaproteobacteria;o__Neisseriales;f__Neisseriaceae;g__Neisseria;s__Neisseria lactamica	0.551435601	0.004272474	0.190457068	0.96
#N/A	k__Bacteria;p__Proteobacteria;c__Betaproteobacteria;o__Neisseriales;f__Neisseriaceae;g__Neisseria;s__Neisseria elongata;t__Neisseria elongata subsp. glycolytica	0.551435601	0.004272474	0.190457068	0.96
#N/A	k__Bacteria;p__Proteobacteria;c__Betaproteobacteria;o__Neisseriales;f__Neisseriaceae;g__Kingella;s__Kingella denitrificans	0.551435601	0.004272474	0.190457068	0.96
#N/A	k__Bacteria;p__Proteobacteria;c__Alphaproteobacteria;o__Rhizobiales;f__Phyllobacteriaceae;g__Mesorhizobium;s__Mesorhizobium plurifarium	0.551435601	0.004272474	0.190457068	0.88
#N/A	k__Bacteria;p__Proteobacteria;c__Alphaproteobacteria;o__Rhodobacterales;f__Rhodobacteraceae;g__Thalassobacter;s__Thalassobacter stenotrophicus	0.551435601	0.004272474	0.190457068	0.88
unclassified	k__Bacteria;p__Proteobacteria;c__Alphaproteobacteria;o__Rhizobiales;f__Phyllobacteriaceae;g__Mesorhizobium;s__Mesorhizobium plurifarium	0.551435601	0.004272474	0.190457068	0.88
unclassified	k__Bacteria;p__Proteobacteria;c__Alphaproteobacteria;o__Rhodobacterales;f__Rhodobacteraceae;g__Thalassobacter;s__Thalassobacter stenotrophicus	0.551435601	0.004272474	0.190457068	0.88
Monoalkylglycerophosphocholines	k__Bacteria;p__Proteobacteria;c__Betaproteobacteria;o__Neisseriales;f__Neisseriaceae;g__Neisseria;s__Neisseria lactamica	0.551435601	0.004272474	0.190457068	0.96
Monoalkylglycerophosphocholines	k__Bacteria;p__Proteobacteria;c__Betaproteobacteria;o__Neisseriales;f__Neisseriaceae;g__Neisseria;s__Neisseria elongata;t__Neisseria elongata subsp. glycolytica	0.551435601	0.004272474	0.190457068	0.96
Monoalkylglycerophosphocholines	k__Bacteria;p__Proteobacteria;c__Betaproteobacteria;o__Neisseriales;f__Neisseriaceae;g__Kingella;s__Kingella denitrificans	0.551435601	0.004272474	0.190457068	0.96
unclassified	k__Bacteria;p__Proteobacteria;c__Betaproteobacteria;o__Neisseriales;f__Neisseriaceae;g__Neisseria;s__Neisseria lactamica	0.551435601	0.004272474	0.190457068	0.96
unclassified	k__Bacteria;p__Proteobacteria;c__Betaproteobacteria;o__Neisseriales;f__Neisseriaceae;g__Neisseria;s__Neisseria elongata;t__Neisseria elongata subsp. glycolytica	0.551435601	0.004272474	0.190457068	0.96
unclassified	k__Bacteria;p__Proteobacteria;c__Betaproteobacteria;o__Neisseriales;f__Neisseriaceae;g__Kingella;s__Kingella denitrificans	0.551435601	0.004272474	0.190457068	0.96
unclassified	k__Bacteria;p__Proteobacteria;c__Betaproteobacteria;o__Neisseriales;f__Neisseriaceae;g__Neisseria;s__Neisseria lactamica	0.551435601	0.004272474	0.190457068	0.96
unclassified	k__Bacteria;p__Proteobacteria;c__Betaproteobacteria;o__Neisseriales;f__Neisseriaceae;g__Neisseria;s__Neisseria elongata;t__Neisseria elongata subsp. glycolytica	0.551435601	0.004272474	0.190457068	0.96
unclassified	k__Bacteria;p__Proteobacteria;c__Betaproteobacteria;o__Neisseriales;f__Neisseriaceae;g__Kingella;s__Kingella denitrificans	0.551435601	0.004272474	0.190457068	0.96
unclassified	k__Bacteria;p__Proteobacteria;c__Alphaproteobacteria;o__Rhizobiales;f__Phyllobacteriaceae;g__Mesorhizobium;s__Mesorhizobium plurifarium	0.551435601	0.004272474	0.190457068	0.88
unclassified	k__Bacteria;p__Proteobacteria;c__Alphaproteobacteria;o__Rhodobacterales;f__Rhodobacteraceae;g__Thalassobacter;s__Thalassobacter stenotrophicus	0.551435601	0.004272474	0.190457068	0.88
Coumarins and derivatives	k__Bacteria;p__Proteobacteria;c__Betaproteobacteria;o__Neisseriales;f__Neisseriaceae;g__Neisseria;s__Neisseria lactamica	0.551435601	0.004272474	0.190457068	0.96
Coumarins and derivatives	k__Bacteria;p__Proteobacteria;c__Betaproteobacteria;o__Neisseriales;f__Neisseriaceae;g__Neisseria;s__Neisseria elongata;t__Neisseria elongata subsp. glycolytica	0.551435601	0.004272474	0.190457068	0.96
Coumarins and derivatives	k__Bacteria;p__Proteobacteria;c__Betaproteobacteria;o__Neisseriales;f__Neisseriaceae;g__Kingella;s__Kingella denitrificans	0.551435601	0.004272474	0.190457068	0.96
unclassified	k__Bacteria;p__Proteobacteria;c__Alphaproteobacteria;o__Rhizobiales;f__Phyllobacteriaceae;g__Mesorhizobium;s__Mesorhizobium plurifarium	0.551435601	0.004272474	0.190457068	0.88
unclassified	k__Bacteria;p__Proteobacteria;c__Alphaproteobacteria;o__Rhodobacterales;f__Rhodobacteraceae;g__Thalassobacter;s__Thalassobacter stenotrophicus	0.551435601	0.004272474	0.190457068	0.88
unclassified	k__Bacteria;p__Proteobacteria;c__Alphaproteobacteria;o__Rhizobiales;f__Phyllobacteriaceae;g__Mesorhizobium;s__Mesorhizobium plurifarium	0.551435601	0.004272474	0.190457068	0.88
unclassified	k__Bacteria;p__Proteobacteria;c__Alphaproteobacteria;o__Rhodobacterales;f__Rhodobacteraceae;g__Thalassobacter;s__Thalassobacter stenotrophicus	0.551435601	0.004272474	0.190457068	0.88
#N/A	k__Bacteria;p__Proteobacteria;c__Alphaproteobacteria;o__Rhizobiales;f__Phyllobacteriaceae;g__Mesorhizobium;s__Mesorhizobium plurifarium	0.551435601	0.004272474	0.190457068	0.88
#N/A	k__Bacteria;p__Proteobacteria;c__Alphaproteobacteria;o__Rhodobacterales;f__Rhodobacteraceae;g__Thalassobacter;s__Thalassobacter stenotrophicus	0.551435601	0.004272474	0.190457068	0.88
#N/A	k__Bacteria;p__Proteobacteria;c__Alphaproteobacteria;o__Rhizobiales;f__Phyllobacteriaceae;g__Mesorhizobium;s__Mesorhizobium plurifarium	0.551435601	0.004272474	0.190457068	0.88
#N/A	k__Bacteria;p__Proteobacteria;c__Alphaproteobacteria;o__Rhodobacterales;f__Rhodobacteraceae;g__Thalassobacter;s__Thalassobacter stenotrophicus	0.551435601	0.004272474	0.190457068	0.88
#N/A	k__Bacteria;p__Proteobacteria;c__Betaproteobacteria;o__Neisseriales;f__Neisseriaceae;g__Neisseria;s__Neisseria lactamica	0.551435601	0.004272474	0.190457068	0.96
#N/A	k__Bacteria;p__Proteobacteria;c__Betaproteobacteria;o__Neisseriales;f__Neisseriaceae;g__Neisseria;s__Neisseria elongata;t__Neisseria elongata subsp. glycolytica	0.551435601	0.004272474	0.190457068	0.96
#N/A	k__Bacteria;p__Proteobacteria;c__Betaproteobacteria;o__Neisseriales;f__Neisseriaceae;g__Kingella;s__Kingella denitrificans	0.551435601	0.004272474	0.190457068	0.96
Beta amino acids and derivatives	k__Bacteria;p__Proteobacteria;c__Deltaproteobacteria;o__Desulfovibrionales;f__Desulfovibrionaceae;g__Lawsonia;s__Lawsonia intracellularis	0.549028663	0.004479068	0.198318942	0.72
Harmala alkaloids	k__Bacteria;p__Proteobacteria;c__Deltaproteobacteria;o__Desulfovibrionales;f__Desulfovibrionaceae;g__Lawsonia;s__Lawsonia intracellularis	0.548518057	0.004523962	0.200135396	0.88
unclassified	k__Bacteria;p__Proteobacteria;c__Deltaproteobacteria;o__Desulfovibrionales;f__Desulfovibrionaceae;g__Lawsonia;s__Lawsonia intracellularis	0.548518057	0.004523962	0.200135396	0.88
Monohydroxy bile acids, alcohols and derivatives	k__Bacteria;p__Proteobacteria;c__Deltaproteobacteria;o__Desulfovibrionales;f__Desulfovibrionaceae;g__Lawsonia;s__Lawsonia intracellularis	0.548459978	0.004529093	0.200322311	0.32
unclassified	k__Bacteria;p__Proteobacteria;c__Deltaproteobacteria;o__Myxococcales;f__Polyangiaceae;g__Chondromyces;s__Chondromyces apiculatus	0.547414186	0.004622318	0.203186562	0.76
Beta amino acids and derivatives	k__Bacteria;p__Proteobacteria;c__Deltaproteobacteria;o__Desulfovibrionales;f__Desulfovibrionaceae;g__Lawsonia;s__Lawsonia intracellularis	0.547038824	0.004656171	0.204387419	0.36
#N/A	k__Bacteria;p__Proteobacteria;c__Betaproteobacteria;o__Neisseriales;f__Neisseriaceae;g__Neisseria;s__Neisseria elongata;t__Neisseria elongata subsp. glycolytica	0.546916733	0.004667227	0.204762029	0.64
unclassified	k__Bacteria;p__Proteobacteria;c__Betaproteobacteria;o__Neisseriales;f__Neisseriaceae;g__Neisseria;s__Neisseria mucosa	0.546515419	0.004703725	0.20611807	0.24
Monohydroxy bile acids, alcohols and derivatives	k__Bacteria;p__Proteobacteria;c__Deltaproteobacteria;o__Desulfovibrionales;f__Desulfovibrionaceae;g__Lawsonia;s__Lawsonia intracellularis	0.546416985	0.004712714	0.206356667	0.32
N-piperazineacetamides	k__Bacteria;p__Proteobacteria;c__Deltaproteobacteria;o__Desulfovibrionales;f__Desulfovibrionaceae;g__Lawsonia;s__Lawsonia intracellularis	0.544846275	0.004858122	0.211634763	0.92
#N/A	k__Bacteria;p__Proteobacteria;c__Deltaproteobacteria;o__Desulfovibrionales;f__Desulfovibrionaceae;g__Lawsonia;s__Lawsonia intracellularis	0.544846275	0.004858122	0.211634763	0.92
unclassified	k__Bacteria;p__Proteobacteria;c__Gammaproteobacteria;o__Chromatiales;f__Chromatiaceae;g__Rheinheimera;s__Rheinheimera perlucida	0.544757233	0.004866477	0.211711102	0.6
Dihydroxy bile acids, alcohols and derivatives	k__Bacteria;p__Proteobacteria;c__Deltaproteobacteria;o__Myxococcales;f__Polyangiaceae;g__Chondromyces;s__Chondromyces apiculatus	0.54474807	0.004867338	0.211711102	0.72
N-alkylindoles	k__Bacteria;p__Proteobacteria;c__Deltaproteobacteria;o__Desulfovibrionales;f__Desulfovibrionaceae;g__Lawsonia;s__Lawsonia intracellularis	0.544485261	0.004892072	0.21243617	0.76
Beta amino acids and derivatives	k__Bacteria;p__Proteobacteria;c__Deltaproteobacteria;o__Desulfovibrionales;f__Desulfovibrionaceae;g__Lawsonia;s__Lawsonia intracellularis	0.544337462	0.004906029	0.212933581	0.36
N-alkylindoles	k__Bacteria;p__Proteobacteria;c__Deltaproteobacteria;o__Desulfovibrionales;f__Desulfovibrionaceae;g__Lawsonia;s__Lawsonia intracellularis	0.544332466	0.004906501	0.21294573	0.76
unclassified	k__Bacteria;p__Proteobacteria;c__Gammaproteobacteria;o__Thiotrichales;f__Francisellaceae;g__Francisella;s__Francisella tularensis;t__Francisella tularensis subsp. holarctica	0.54305232	0.005028806	0.217364085	0.76
unclassified	k__Bacteria;p__Proteobacteria;c__Gammaproteobacteria;o__Thiotrichales;f__Francisellaceae;g__Francisella;s__Francisella sp. W12-1067	0.54305232	0.005028806	0.217364085	0.76
#N/A	k__Bacteria;p__Proteobacteria;c__Betaproteobacteria;o__Neisseriales;f__Neisseriaceae;g__Neisseria;s__Neisseria mucosa	0.542720127	0.00506096	0.218368332	0.92
#N/A	k__Bacteria;p__Proteobacteria;c__Betaproteobacteria;o__Neisseriales;f__Neisseriaceae;g__Neisseria;s__Neisseria mucosa	0.542720127	0.00506096	0.218368332	0.92
unclassified	k__Bacteria;p__Proteobacteria;c__Betaproteobacteria;o__Neisseriales;f__Neisseriaceae;g__Neisseria;s__Neisseria mucosa	0.542720127	0.00506096	0.218368332	0.92
unclassified	k__Bacteria;p__Proteobacteria;c__Betaproteobacteria;o__Neisseriales;f__Neisseriaceae;g__Neisseria;s__Neisseria mucosa	0.542720127	0.00506096	0.218368332	0.92
Dipeptides	k__Bacteria;p__Proteobacteria;c__Betaproteobacteria;o__Neisseriales;f__Neisseriaceae;g__Neisseria;s__Neisseria mucosa	0.542720127	0.00506096	0.218368332	0.92
Purines and purine derivatives	k__Bacteria;p__Proteobacteria;c__Deltaproteobacteria;o__Desulfovibrionales;f__Desulfovibrionaceae;g__Lawsonia;s__Lawsonia intracellularis	0.542193491	0.00511229	0.220092012	0.88
unclassified	k__Bacteria;p__Proteobacteria;c__Deltaproteobacteria;o__Desulfovibrionales;f__Desulfovibrionaceae;g__Lawsonia;s__Lawsonia intracellularis	0.542193491	0.00511229	0.220092012	0.88
#N/A	k__Bacteria;p__Proteobacteria;c__Gammaproteobacteria;o__Thiotrichales;f__Francisellaceae;g__Francisella;s__Francisella tularensis;t__Francisella tularensis subsp. holarctica	0.540621191	0.005268155	0.225318244	0.72
#N/A	k__Bacteria;p__Proteobacteria;c__Gammaproteobacteria;o__Thiotrichales;f__Francisellaceae;g__Francisella;s__Francisella sp. W12-1067	0.540621191	0.005268155	0.225318244	0.72
unclassified	k__Bacteria;p__Proteobacteria;c__Gammaproteobacteria;o__Thiotrichales;f__Francisellaceae;g__Francisella;s__Francisella tularensis;t__Francisella tularensis subsp. holarctica	0.540594835	0.005270801	0.225335606	0.68
unclassified	k__Bacteria;p__Proteobacteria;c__Gammaproteobacteria;o__Thiotrichales;f__Francisellaceae;g__Francisella;s__Francisella sp. W12-1067	0.540594835	0.005270801	0.225335606	0.68
unclassified	k__Bacteria;p__Proteobacteria;c__Betaproteobacteria;o__Rhodocyclales;f__Rhodocyclaceae;g__;s__Rhodocyclaceae bacterium Paddy-1	0.539580172	0.005373538	0.229121211	0.6
Cerveratrum-type alkaloids	k__Bacteria;p__Proteobacteria;c__Betaproteobacteria;o__Neisseriales;f__Neisseriaceae;g__Neisseria;s__Neisseria mucosa	0.539004782	0.005432543	0.23119611	0.68
Spirosolanes and derivatives	k__Bacteria;p__Proteobacteria;c__Betaproteobacteria;o__Neisseriales;f__Neisseriaceae;g__Neisseria;s__Neisseria elongata;t__Neisseria elongata subsp. glycolytica	0.538197771	0.005516217	0.234108694	0.64
Harmala alkaloids	k__Bacteria;p__Proteobacteria;c__Deltaproteobacteria;o__Desulfovibrionales;f__Desulfovibrionaceae;g__Lawsonia;s__Lawsonia intracellularis	0.538079731	0.005528546	0.234532981	0.88
unclassified	k__Bacteria;p__Proteobacteria;c__Deltaproteobacteria;o__Desulfovibrionales;f__Desulfovibrionaceae;g__Lawsonia;s__Lawsonia intracellularis	0.538079731	0.005528546	0.234532981	0.88
#N/A	k__Bacteria;p__Proteobacteria;c__Betaproteobacteria;o__Burkholderiales;f__Comamonadaceae;g__Ottowia;s__Ottowia thiooxydans	0.538041505	0.005532544	0.234693573	0.92
unclassified	k__Bacteria;p__Proteobacteria;c__Betaproteobacteria;o__Burkholderiales;f__Comamonadaceae;g__Ottowia;s__Ottowia thiooxydans	0.538023005	0.00553448	0.23476668	0.84
unclassified	k__Bacteria;p__Proteobacteria;c__Betaproteobacteria;o__Neisseriales;f__Neisseriaceae;g__Neisseria;s__Neisseria elongata;t__Neisseria elongata subsp. glycolytica	0.536913362	0.005651625	0.238292263	0.52
#N/A	k__Bacteria;p__Proteobacteria;c__Deltaproteobacteria;o__Desulfovibrionales;f__Desulfovibrionaceae;g__Lawsonia;s__Lawsonia intracellularis	0.534557344	0.005907274	0.238454225	0.48
Bilirubins	k__Bacteria;p__Proteobacteria;c__Betaproteobacteria;o__Neisseriales;f__Neisseriaceae;g__Neisseria;s__Neisseria lactamica	0.53445055	0.005919088	0.238454225	0.84
Bilirubins	k__Bacteria;p__Proteobacteria;c__Betaproteobacteria;o__Neisseriales;f__Neisseriaceae;g__Neisseria;s__Neisseria elongata;t__Neisseria elongata subsp. glycolytica	0.53445055	0.005919088	0.238454225	0.84
Bilirubins	k__Bacteria;p__Proteobacteria;c__Betaproteobacteria;o__Neisseriales;f__Neisseriaceae;g__Kingella;s__Kingella denitrificans	0.53445055	0.005919088	0.238454225	0.84
#N/A	k__Bacteria;p__Proteobacteria;c__Deltaproteobacteria;o__Desulfovibrionales;f__Desulfovibrionaceae;g__Lawsonia;s__Lawsonia intracellularis	0.533229623	0.006055574	0.238454225	0.48
unclassified	k__Bacteria;p__Proteobacteria;c__Gammaproteobacteria;o__Pasteurellales;f__Pasteurellaceae;g__Mannheimia;s__Mannheimia haemolytica	0.53306184	0.006074535	0.238454225	0.16
unclassified	k__Bacteria;p__Proteobacteria;c__Betaproteobacteria;o__Neisseriales;f__Neisseriaceae;g__Neisseria;s__Neisseria lactamica	0.532317014	0.00615931	0.238454225	0.84
unclassified	k__Bacteria;p__Proteobacteria;c__Betaproteobacteria;o__Neisseriales;f__Neisseriaceae;g__Neisseria;s__Neisseria elongata;t__Neisseria elongata subsp. glycolytica	0.532317014	0.00615931	0.238454225	0.84
unclassified	k__Bacteria;p__Proteobacteria;c__Betaproteobacteria;o__Neisseriales;f__Neisseriaceae;g__Kingella;s__Kingella denitrificans	0.532317014	0.00615931	0.238454225	0.84
#N/A	k__Bacteria;p__Proteobacteria;c__Deltaproteobacteria;o__Desulfovibrionales;f__Desulfovibrionaceae;g__Lawsonia;s__Lawsonia intracellularis	0.532164088	0.006176838	0.238454225	0.92
N-piperazineacetamides	k__Bacteria;p__Proteobacteria;c__Deltaproteobacteria;o__Desulfovibrionales;f__Desulfovibrionaceae;g__Lawsonia;s__Lawsonia intracellularis	0.532164088	0.006176838	0.238454225	0.92
#N/A	k__Bacteria;p__Proteobacteria;c__Deltaproteobacteria;o__Desulfovibrionales;f__Desulfovibrionaceae;g__Lawsonia;s__Lawsonia intracellularis	0.532164088	0.006176838	0.238454225	0.92
unclassified	k__Bacteria;p__Proteobacteria;c__Alphaproteobacteria;o__Rhizobiales;f__Phyllobacteriaceae;g__Mesorhizobium;s__Mesorhizobium plurifarium	0.531995177	0.006196247	0.238454225	0.84
unclassified	k__Bacteria;p__Proteobacteria;c__Alphaproteobacteria;o__Rhodobacterales;f__Rhodobacteraceae;g__Thalassobacter;s__Thalassobacter stenotrophicus	0.531995177	0.006196247	0.238454225	0.84
unclassified	k__Bacteria;p__Proteobacteria;c__Alphaproteobacteria;o__Rhizobiales;f__Phyllobacteriaceae;g__Mesorhizobium;s__Mesorhizobium plurifarium	0.531995177	0.006196247	0.238454225	0.84
unclassified	k__Bacteria;p__Proteobacteria;c__Alphaproteobacteria;o__Rhodobacterales;f__Rhodobacteraceae;g__Thalassobacter;s__Thalassobacter stenotrophicus	0.531995177	0.006196247	0.238454225	0.84
#N/A	k__Bacteria;p__Proteobacteria;c__Alphaproteobacteria;o__Rhizobiales;f__Phyllobacteriaceae;g__Mesorhizobium;s__Mesorhizobium plurifarium	0.531995177	0.006196247	0.238454225	0.84
#N/A	k__Bacteria;p__Proteobacteria;c__Alphaproteobacteria;o__Rhodobacterales;f__Rhodobacteraceae;g__Thalassobacter;s__Thalassobacter stenotrophicus	0.531995177	0.006196247	0.238454225	0.84
unclassified	k__Bacteria;p__Proteobacteria;c__Betaproteobacteria;o__Neisseriales;f__Neisseriaceae;g__Neisseria;s__Neisseria lactamica	0.530674716	0.006349748	0.243371007	0.48
unclassified	k__Bacteria;p__Proteobacteria;c__Betaproteobacteria;o__Neisseriales;f__Neisseriaceae;g__Kingella;s__Kingella denitrificans	0.530674716	0.006349748	0.243371007	0.48
#N/A	k__Bacteria;p__Proteobacteria;c__Deltaproteobacteria;o__Desulfovibrionales;f__Desulfovibrionaceae;g__Lawsonia;s__Lawsonia intracellularis	0.530154465	0.006411096	0.244536275	0.68
unclassified	k__Bacteria;p__Proteobacteria;c__Betaproteobacteria;o__Neisseriales;f__Neisseriaceae;g__Neisseria;s__Neisseria lactamica	0.529116712	0.006534952	0.248046126	0.84
unclassified	k__Bacteria;p__Proteobacteria;c__Betaproteobacteria;o__Neisseriales;f__Neisseriaceae;g__Kingella;s__Kingella denitrificans	0.529116712	0.006534952	0.248046126	0.84
unclassified	k__Bacteria;p__Proteobacteria;c__Betaproteobacteria;o__Neisseriales;f__Neisseriaceae;g__Neisseria;s__Neisseria elongata;t__Neisseria elongata subsp. glycolytica	0.529116712	0.006534952	0.248046126	0.84
#N/A	k__Bacteria;p__Proteobacteria;c__Gammaproteobacteria;o__Thiotrichales;f__Francisellaceae;g__Francisella;s__Francisella tularensis;t__Francisella tularensis subsp. holarctica	0.528476077	0.006612409	0.250127973	0.8
#N/A	k__Bacteria;p__Proteobacteria;c__Gammaproteobacteria;o__Thiotrichales;f__Francisellaceae;g__Francisella;s__Francisella sp. W12-1067	0.528476077	0.006612409	0.250127973	0.8
#N/A	k__Bacteria;p__Proteobacteria;c__Deltaproteobacteria;o__Desulfovibrionales;f__Desulfovibrionaceae;g__Lawsonia;s__Lawsonia intracellularis	0.528323134	0.006631014	0.250694601	0.68
#N/A	k__Bacteria;p__Proteobacteria;c__Deltaproteobacteria;o__Desulfovibrionales;f__Desulfovibrionaceae;g__Lawsonia;s__Lawsonia intracellularis	0.526930908	0.0068024	0.255775601	0.84
#N/A	k__Bacteria;p__Proteobacteria;c__Gammaproteobacteria;o__Chromatiales;f__Chromatiaceae;g__Rheinheimera;s__Rheinheimera perlucida	0.526688107	0.006832666	0.256625802	0.96
unclassified	k__Bacteria;p__Proteobacteria;c__Gammaproteobacteria;o__Chromatiales;f__Chromatiaceae;g__Rheinheimera;s__Rheinheimera perlucida	0.526688107	0.006832666	0.256625802	0.96
#N/A	k__Bacteria;p__Proteobacteria;c__Gammaproteobacteria;o__Chromatiales;f__Chromatiaceae;g__Rheinheimera;s__Rheinheimera perlucida	0.526688107	0.006832666	0.256625802	0.96
unclassified	k__Bacteria;p__Proteobacteria;c__Gammaproteobacteria;o__Chromatiales;f__Chromatiaceae;g__Rheinheimera;s__Rheinheimera perlucida	0.526688107	0.006832666	0.256625802	0.96
Curcuminoids	k__Bacteria;p__Proteobacteria;c__Gammaproteobacteria;o__Chromatiales;f__Chromatiaceae;g__Rheinheimera;s__Rheinheimera perlucida	0.526688107	0.006832666	0.256625802	0.96
Dialkylamines	k__Bacteria;p__Proteobacteria;c__Gammaproteobacteria;o__Chromatiales;f__Chromatiaceae;g__Rheinheimera;s__Rheinheimera perlucida	0.526688107	0.006832666	0.256625802	0.96
unclassified	k__Bacteria;p__Proteobacteria;c__Gammaproteobacteria;o__Chromatiales;f__Chromatiaceae;g__Rheinheimera;s__Rheinheimera perlucida	0.526688107	0.006832666	0.256625802	0.96
Phenylpyridines	k__Bacteria;p__Proteobacteria;c__Gammaproteobacteria;o__Chromatiales;f__Chromatiaceae;g__Rheinheimera;s__Rheinheimera perlucida	0.526688107	0.006832666	0.256625802	0.96
Bile acids, alcohols and derivatives	k__Bacteria;p__Proteobacteria;c__Gammaproteobacteria;o__Chromatiales;f__Chromatiaceae;g__Rheinheimera;s__Rheinheimera perlucida	0.526688107	0.006832666	0.256625802	0.96
#N/A	k__Bacteria;p__Proteobacteria;c__Gammaproteobacteria;o__Chromatiales;f__Chromatiaceae;g__Rheinheimera;s__Rheinheimera perlucida	0.526688107	0.006832666	0.256625802	0.96
unclassified	k__Bacteria;p__Proteobacteria;c__Gammaproteobacteria;o__Chromatiales;f__Chromatiaceae;g__Rheinheimera;s__Rheinheimera perlucida	0.526688107	0.006832666	0.256625802	0.96
unclassified	k__Bacteria;p__Proteobacteria;c__Gammaproteobacteria;o__Chromatiales;f__Chromatiaceae;g__Rheinheimera;s__Rheinheimera perlucida	0.526688107	0.006832666	0.256625802	0.96
#N/A	k__Bacteria;p__Proteobacteria;c__Betaproteobacteria;o__Neisseriales;f__Neisseriaceae;g__Neisseria;s__Neisseria mucosa	0.525997128	0.006919417	0.25936454	0.88
unclassified	k__Bacteria;p__Proteobacteria;c__Betaproteobacteria;o__Neisseriales;f__Neisseriaceae;g__Neisseria;s__Neisseria mucosa	0.525836999	0.006939651	0.259809017	0.72
#N/A	k__Bacteria;p__Proteobacteria;c__Deltaproteobacteria;o__Myxococcales;f__Polyangiaceae;g__Chondromyces;s__Chondromyces apiculatus	0.523799298	0.007201504	0.266825053	0.8
Glycinated bile acids and derivatives	k__Bacteria;p__Proteobacteria;c__Deltaproteobacteria;o__Myxococcales;f__Polyangiaceae;g__Chondromyces;s__Chondromyces apiculatus	0.523423923	0.007250631	0.267805446	0.76
unclassified	k__Bacteria;p__Proteobacteria;c__Betaproteobacteria;o__Burkholderiales;f__Comamonadaceae;g__Ottowia;s__Ottowia thiooxydans	0.522697113	0.00734655	0.270760669	0.6
#N/A	k__Bacteria;p__Proteobacteria;c__Betaproteobacteria;o__Neisseriales;f__Neisseriaceae;g__Neisseria;s__Neisseria mucosa	0.522503111	0.007372331	0.271582969	0.84
unclassified	k__Bacteria;p__Proteobacteria;c__Betaproteobacteria;o__Burkholderiales;f__Alcaligenaceae;g__Oligella;s__Oligella ureolytica	0.522073078	0.007429749	0.273217202	0.88
Glycosylamines	k__Bacteria;p__Proteobacteria;c__Gammaproteobacteria;o__Chromatiales;f__Chromatiaceae;g__Rheinheimera;s__Rheinheimera perlucida	0.521964249	0.007444339	0.273671853	0.84
#N/A	k__Bacteria;p__Proteobacteria;c__Gammaproteobacteria;o__Pasteurellales;f__Pasteurellaceae;g__Mannheimia;s__Mannheimia haemolytica	0.521695443	0.007480479	0.274845179	0.68
#N/A	k__Bacteria;p__Proteobacteria;c__Gammaproteobacteria;o__Thiotrichales;f__Francisellaceae;g__Francisella;s__Francisella tularensis;t__Francisella tularensis subsp. holarctica	0.521097155	0.007561442	0.276799527	0.64
#N/A	k__Bacteria;p__Proteobacteria;c__Gammaproteobacteria;o__Thiotrichales;f__Francisellaceae;g__Francisella;s__Francisella sp. W12-1067	0.521097155	0.007561442	0.276799527	0.64
#N/A	k__Bacteria;p__Proteobacteria;c__Gammaproteobacteria;o__Pasteurellales;f__Pasteurellaceae;g__Mannheimia;s__Mannheimia haemolytica	0.521065829	0.007565702	0.27693712	0.8
Oligopeptides	k__Bacteria;p__Proteobacteria;c__Deltaproteobacteria;o__Desulfovibrionales;f__Desulfovibrionaceae;g__Lawsonia;s__Lawsonia intracellularis	0.521032051	0.007570297	0.277068649	0.68
Fatty acid esters	k__Bacteria;p__Proteobacteria;c__Deltaproteobacteria;o__Desulfovibrionales;f__Desulfovibrionaceae;g__Lawsonia;s__Lawsonia intracellularis	0.520125149	0.00769454	0.28040071	0.88
unclassified	k__Bacteria;p__Proteobacteria;c__Deltaproteobacteria;o__Desulfovibrionales;f__Desulfovibrionaceae;g__Lawsonia;s__Lawsonia intracellularis	0.520125149	0.00769454	0.28040071	0.88
#N/A	k__Bacteria;p__Proteobacteria;c__Gammaproteobacteria;o__Pasteurellales;f__Pasteurellaceae;g__Mannheimia;s__Mannheimia haemolytica	0.520063228	0.007703085	0.280662355	0.64
Oligopeptides	k__Bacteria;p__Proteobacteria;c__Deltaproteobacteria;o__Desulfovibrionales;f__Desulfovibrionaceae;g__Lawsonia;s__Lawsonia intracellularis	0.520056285	0.007704043	0.280662355	0.68
#N/A	k__Bacteria;p__Proteobacteria;c__Deltaproteobacteria;o__Myxococcales;f__Polyangiaceae;g__Chondromyces;s__Chondromyces apiculatus	0.519986794	0.007713643	0.280662355	0.72
#N/A	k__Bacteria;p__Proteobacteria;c__Deltaproteobacteria;o__Desulfovibrionales;f__Desulfovibrionaceae;g__Lawsonia;s__Lawsonia intracellularis	0.519183226	0.00782538	0.284008695	0.92
#N/A	k__Bacteria;p__Proteobacteria;c__Betaproteobacteria;o__Burkholderiales;f__Alcaligenaceae;g__Oligella;s__Oligella ureolytica	0.519131821	0.007832574	0.284213832	0.88
#N/A	k__Bacteria;p__Proteobacteria;c__Deltaproteobacteria;o__Myxococcales;f__Polyangiaceae;g__Chondromyces;s__Chondromyces apiculatus	0.519062057	0.007842345	0.284232802	0.76
#N/A	k__Bacteria;p__Proteobacteria;c__Gammaproteobacteria;o__Thiotrichales;f__Francisellaceae;g__Francisella;s__Francisella tularensis;t__Francisella tularensis subsp. holarctica	0.518892122	0.00786619	0.284723916	0.68
#N/A	k__Bacteria;p__Proteobacteria;c__Gammaproteobacteria;o__Thiotrichales;f__Francisellaceae;g__Francisella;s__Francisella sp. W12-1067	0.518892122	0.00786619	0.284723916	0.68
#N/A	k__Bacteria;p__Proteobacteria;c__Deltaproteobacteria;o__Desulfovibrionales;f__Desulfovibrionaceae;g__Lawsonia;s__Lawsonia intracellularis	0.51877943	0.007882036	0.28517619	0.84
unclassified	k__Bacteria;p__Proteobacteria;c__Betaproteobacteria;o__Burkholderiales;f__Alcaligenaceae;g__Oligella;s__Oligella ureolytica	0.517512284	0.008062057	0.289982417	0.76
unclassified	k__Bacteria;p__Proteobacteria;c__Betaproteobacteria;o__Neisseriales;f__Neisseriaceae;g__Neisseria;s__Neisseria mucosa	0.517495897	0.008064407	0.2900481	0.72
Fatty acid esters	k__Bacteria;p__Proteobacteria;c__Betaproteobacteria;o__Neisseriales;f__Neisseriaceae;g__Neisseria;s__Neisseria elongata;t__Neisseria elongata subsp. glycolytica	0.51743783	0.00807274	0.29029118	0.56
Hydroxyindoles	k__Bacteria;p__Proteobacteria;c__Betaproteobacteria;o__Burkholderiales;f__Comamonadaceae;g__Ottowia;s__Ottowia thiooxydans	0.51713277	0.008116636	0.291632691	0.8
unclassified	k__Bacteria;p__Proteobacteria;c__Deltaproteobacteria;o__Desulfovibrionales;f__Desulfovibrionaceae;g__Lawsonia;s__Lawsonia intracellularis	0.516741637	0.008173209	0.292989768	0.84
unclassified	k__Bacteria;p__Proteobacteria;c__Deltaproteobacteria;o__Desulfovibrionales;f__Desulfovibrionaceae;g__Lawsonia;s__Lawsonia intracellularis	0.516596627	0.008194267	0.29363045	0.84
unclassified	k__Bacteria;p__Proteobacteria;c__Betaproteobacteria;o__Burkholderiales;f__Alcaligenaceae;g__Oligella;s__Oligella ureolytica	0.516318617	0.008234764	0.294690275	0.84
#N/A	k__Bacteria;p__Proteobacteria;c__Betaproteobacteria;o__Burkholderiales;f__Alcaligenaceae;g__Oligella;s__Oligella ureolytica	0.516259588	0.008243384	0.294855688	0.8
unclassified	k__Bacteria;p__Proteobacteria;c__Deltaproteobacteria;o__Desulfovibrionales;f__Desulfovibrionaceae;g__Lawsonia;s__Lawsonia intracellularis	0.515869026	0.008300608	0.296701088	0.84
1-acyl-sn-glycero-3-phosphocholines	k__Bacteria;p__Proteobacteria;c__Betaproteobacteria;o__Burkholderiales;f__Comamonadaceae;g__Ottowia;s__Ottowia thiooxydans	0.515759927	0.008316652	0.297207356	0.88
#N/A	k__Bacteria;p__Proteobacteria;c__Betaproteobacteria;o__Rhodocyclales;f__Rhodocyclaceae;g__;s__Rhodocyclaceae bacterium Paddy-1	0.515175994	0.008402965	0.299846334	0.68
Medium-chain fatty acids	k__Bacteria;p__Proteobacteria;c__Deltaproteobacteria;o__Myxococcales;f__Polyangiaceae;g__Chondromyces;s__Chondromyces apiculatus	0.514700191	0.008473846	0.301558589	0.76
#N/A	k__Bacteria;p__Proteobacteria;c__Gammaproteobacteria;o__Thiotrichales;f__Francisellaceae;g__Francisella;s__Francisella tularensis;t__Francisella tularensis subsp. holarctica	0.513796475	0.008609846	0.30500525	0.72
#N/A	k__Bacteria;p__Proteobacteria;c__Gammaproteobacteria;o__Thiotrichales;f__Francisellaceae;g__Francisella;s__Francisella sp. W12-1067	0.513796475	0.008609846	0.30500525	0.72
#N/A	k__Bacteria;p__Proteobacteria;c__Gammaproteobacteria;o__Thiotrichales;f__Francisellaceae;g__Francisella;s__Francisella tularensis;t__Francisella tularensis subsp. holarctica	0.513796475	0.008609846	0.30500525	0.72
#N/A	k__Bacteria;p__Proteobacteria;c__Gammaproteobacteria;o__Thiotrichales;f__Francisellaceae;g__Francisella;s__Francisella sp. W12-1067	0.513796475	0.008609846	0.30500525	0.72
#N/A	k__Bacteria;p__Proteobacteria;c__Betaproteobacteria;o__Burkholderiales;f__Comamonadaceae;g__Ottowia;s__Ottowia thiooxydans	0.512835012	0.008756528	0.308672364	0.88
#N/A	k__Bacteria;p__Proteobacteria;c__Betaproteobacteria;o__Burkholderiales;f__Comamonadaceae;g__Ottowia;s__Ottowia thiooxydans	0.512835012	0.008756528	0.308672364	0.88
unclassified	k__Bacteria;p__Proteobacteria;c__Gammaproteobacteria;o__Enterobacterales;f__Yersiniaceae;g__Yersinia;s__Yersinia pestis	0.512155203	0.008861492	0.311505657	0.84
unclassified	k__Bacteria;p__Proteobacteria;c__Betaproteobacteria;o__Neisseriales;f__Neisseriaceae;g__Neisseria;s__Neisseria mucosa	0.512131297	0.008865202	0.311616617	0.6
#N/A	k__Bacteria;p__Proteobacteria;c__Gammaproteobacteria;o__Chromatiales;f__Chromatiaceae;g__Rheinheimera;s__Rheinheimera perlucida	0.511967361	0.008890679	0.312313692	0.8
1-hydroxy-2-unsubstituted benzenoids	k__Bacteria;p__Proteobacteria;c__Betaproteobacteria;o__Burkholderiales;f__Comamonadaceae;g__Delftia;s__Delftia acidovorans	0.511699994	0.008932361	0.313161403	0.8
#N/A	k__Bacteria;p__Proteobacteria;c__Gammaproteobacteria;o__Chromatiales;f__Chromatiaceae;g__Rheinheimera;s__Rheinheimera perlucida	0.51095071	0.00905004	0.316715054	0.68
#N/A	k__Bacteria;p__Proteobacteria;c__Betaproteobacteria;o__Neisseriales;f__Neisseriaceae;g__Neisseria;s__Neisseria lactamica	0.510455618	0.009128503	0.318916171	0.64
#N/A	k__Bacteria;p__Proteobacteria;c__Betaproteobacteria;o__Neisseriales;f__Neisseriaceae;g__Kingella;s__Kingella denitrificans	0.510455618	0.009128503	0.318916171	0.64
unclassified	k__Bacteria;p__Proteobacteria;c__Betaproteobacteria;o__Burkholderiales;f__Alcaligenaceae;g__Oligella;s__Oligella ureolytica	0.510308051	0.009151999	0.319575556	0.88
Fatty acid esters	k__Bacteria;p__Proteobacteria;c__Deltaproteobacteria;o__Desulfovibrionales;f__Desulfovibrionaceae;g__Lawsonia;s__Lawsonia intracellularis	0.509694791	0.009250182	0.322566204	0.88
unclassified	k__Bacteria;p__Proteobacteria;c__Deltaproteobacteria;o__Desulfovibrionales;f__Desulfovibrionaceae;g__Lawsonia;s__Lawsonia intracellularis	0.509694791	0.009250182	0.322566204	0.88
#N/A	k__Bacteria;p__Proteobacteria;c__Deltaproteobacteria;o__Desulfovibrionales;f__Desulfovibrionaceae;g__Lawsonia;s__Lawsonia intracellularis	0.509463585	0.009287425	0.32347747	0.84
unclassified	k__Bacteria;p__Proteobacteria;c__Deltaproteobacteria;o__Desulfovibrionales;f__Desulfovibrionaceae;g__Lawsonia;s__Lawsonia intracellularis	0.509426372	0.009293431	0.3236459	0.88
unclassified	k__Bacteria;p__Proteobacteria;c__Gammaproteobacteria;o__Pasteurellales;f__Pasteurellaceae;g__Mannheimia;s__Mannheimia haemolytica	0.509353416	0.009305215	0.323985458	0.92
#N/A	k__Bacteria;p__Proteobacteria;c__Deltaproteobacteria;o__Desulfovibrionales;f__Desulfovibrionaceae;g__Lawsonia;s__Lawsonia intracellularis	0.509320618	0.009310517	0.324159282	0.84
Monohydroxy bile acids, alcohols and derivatives	k__Bacteria;p__Proteobacteria;c__Deltaproteobacteria;o__Myxococcales;f__Polyangiaceae;g__Chondromyces;s__Chondromyces apiculatus	0.509228559	0.009325411	0.324412409	0.6
unclassified	k__Bacteria;p__Proteobacteria;c__Betaproteobacteria;o__Neisseriales;f__Neisseriaceae;g__Neisseria;s__Neisseria elongata;t__Neisseria elongata subsp. glycolytica	0.509188821	0.009331846	0.324595455	0.56
#N/A	k__Bacteria;p__Proteobacteria;c__Betaproteobacteria;o__Neisseriales;f__Neisseriaceae;g__Neisseria;s__Neisseria lactamica	0.508848128	0.009387172	0.325353736	0.84
#N/A	k__Bacteria;p__Proteobacteria;c__Betaproteobacteria;o__Neisseriales;f__Neisseriaceae;g__Kingella;s__Kingella denitrificans	0.508848128	0.009387172	0.325353736	0.84
#N/A	k__Bacteria;p__Proteobacteria;c__Betaproteobacteria;o__Neisseriales;f__Neisseriaceae;g__Neisseria;s__Neisseria lactamica	0.508848128	0.009387172	0.325353736	0.84
#N/A	k__Bacteria;p__Proteobacteria;c__Betaproteobacteria;o__Neisseriales;f__Neisseriaceae;g__Kingella;s__Kingella denitrificans	0.508848128	0.009387172	0.325353736	0.84
unclassified	k__Bacteria;p__Proteobacteria;c__Betaproteobacteria;o__Rhodocyclales;f__Rhodocyclaceae;g__;s__Rhodocyclaceae bacterium Paddy-1	0.507941507	0.009535729	0.329355515	0.84
Glycosylamines	k__Bacteria;p__Proteobacteria;c__Betaproteobacteria;o__Rhodocyclales;f__Rhodocyclaceae;g__;s__Rhodocyclaceae bacterium Paddy-1	0.507941507	0.009535729	0.329355515	0.84
Monohydroxy bile acids, alcohols and derivatives	k__Bacteria;p__Proteobacteria;c__Betaproteobacteria;o__Burkholderiales;f__Alcaligenaceae;g__Oligella;s__Oligella ureolytica	0.50635006	0.009801226	0.330015935	0.92
Indole-3-acetic acid derivatives	k__Bacteria;p__Proteobacteria;c__Deltaproteobacteria;o__Desulfovibrionales;f__Desulfovibrionaceae;g__Lawsonia;s__Lawsonia intracellularis	0.50589441	0.009878361	0.330015935	0.76
unclassified	k__Bacteria;p__Proteobacteria;c__Deltaproteobacteria;o__Desulfovibrionales;f__Desulfovibrionaceae;g__Lawsonia;s__Lawsonia intracellularis	0.50582456	0.00989023	0.330015935	0.84
#N/A	k__Bacteria;p__Proteobacteria;c__Deltaproteobacteria;o__Desulfovibrionales;f__Desulfovibrionaceae;g__Lawsonia;s__Lawsonia intracellularis	0.505406313	0.009961548	0.330015935	0.4
unclassified	k__Bacteria;p__Proteobacteria;c__Betaproteobacteria;o__Burkholderiales;f__Comamonadaceae;g__Delftia;s__Delftia acidovorans	0.505126889	0.010009431	0.330015935	0.76
unclassified	k__Bacteria;p__Proteobacteria;c__Betaproteobacteria;o__Neisseriales;f__Neisseriaceae;g__Neisseria;s__Neisseria elongata;t__Neisseria elongata subsp. glycolytica	0.504581058	0.010103519	0.330015935	0.84
unclassified	k__Bacteria;p__Proteobacteria;c__Betaproteobacteria;o__Neisseriales;f__Neisseriaceae;g__Neisseria;s__Neisseria elongata;t__Neisseria elongata subsp. glycolytica	0.504581058	0.010103519	0.330015935	0.84
Phenylmethylamines	k__Bacteria;p__Proteobacteria;c__Betaproteobacteria;o__Burkholderiales;f__Comamonadaceae;g__Delftia;s__Delftia acidovorans	0.504478459	0.010121287	0.330015935	0.76
Hexoses	k__Bacteria;p__Proteobacteria;c__Gammaproteobacteria;o__Pasteurellales;f__Pasteurellaceae;g__Mannheimia;s__Mannheimia haemolytica	0.504332514	0.010146605	0.330015935	0.44
Pentahydroxy bile acids, alcohols and derivatives	k__Bacteria;p__Proteobacteria;c__Betaproteobacteria;o__Neisseriales;f__Neisseriaceae;g__Neisseria;s__Neisseria lactamica	0.50351429	0.010289524	0.330015935	0.84
Pentahydroxy bile acids, alcohols and derivatives	k__Bacteria;p__Proteobacteria;c__Betaproteobacteria;o__Neisseriales;f__Neisseriaceae;g__Kingella;s__Kingella denitrificans	0.50351429	0.010289524	0.330015935	0.84
#N/A	k__Bacteria;p__Proteobacteria;c__Deltaproteobacteria;o__Desulfovibrionales;f__Desulfovibrionaceae;g__Lawsonia;s__Lawsonia intracellularis	0.503344239	0.010319436	0.330015935	0.4
unclassified	k__Bacteria;p__Proteobacteria;c__Betaproteobacteria;o__Burkholderiales;f__Comamonadaceae;g__Delftia;s__Delftia acidovorans	0.502760831	0.010422604	0.330015935	0.72
unclassified	k__Bacteria;p__Proteobacteria;c__Deltaproteobacteria;o__Desulfovibrionales;f__Desulfovibrionaceae;g__Lawsonia;s__Lawsonia intracellularis	0.50240354	0.010486208	0.330015935	0.92
Acetamides	k__Bacteria;p__Proteobacteria;c__Betaproteobacteria;o__Neisseriales;f__Neisseriaceae;g__Neisseria;s__Neisseria mucosa	0.501786203	0.010596863	0.330015935	0.68
unclassified	k__Bacteria;p__Proteobacteria;c__Alphaproteobacteria;o__Rhizobiales;f__Phyllobacteriaceae;g__Mesorhizobium;s__Mesorhizobium plurifarium	0.501305092	0.010683769	0.330015935	0.88
unclassified	k__Bacteria;p__Proteobacteria;c__Alphaproteobacteria;o__Rhodobacterales;f__Rhodobacteraceae;g__Thalassobacter;s__Thalassobacter stenotrophicus	0.501305092	0.010683769	0.330015935	0.88
unclassified	k__Bacteria;p__Proteobacteria;c__Alphaproteobacteria;o__Rhizobiales;f__Phyllobacteriaceae;g__Mesorhizobium;s__Mesorhizobium plurifarium	0.501305092	0.010683769	0.330015935	0.88
unclassified	k__Bacteria;p__Proteobacteria;c__Alphaproteobacteria;o__Rhodobacterales;f__Rhodobacteraceae;g__Thalassobacter;s__Thalassobacter stenotrophicus	0.501305092	0.010683769	0.330015935	0.88
unclassified	k__Bacteria;p__Proteobacteria;c__Alphaproteobacteria;o__Rhizobiales;f__Phyllobacteriaceae;g__Mesorhizobium;s__Mesorhizobium plurifarium	0.501305092	0.010683769	0.330015935	0.88
unclassified	k__Bacteria;p__Proteobacteria;c__Alphaproteobacteria;o__Rhodobacterales;f__Rhodobacteraceae;g__Thalassobacter;s__Thalassobacter stenotrophicus	0.501305092	0.010683769	0.330015935	0.88
Glycosylglycerols	k__Bacteria;p__Proteobacteria;c__Betaproteobacteria;o__Neisseriales;f__Neisseriaceae;g__Neisseria;s__Neisseria lactamica	0.501305092	0.010683769	0.330015935	0.96
Glycosylglycerols	k__Bacteria;p__Proteobacteria;c__Betaproteobacteria;o__Neisseriales;f__Neisseriaceae;g__Kingella;s__Kingella denitrificans	0.501305092	0.010683769	0.330015935	0.96
unclassified	k__Bacteria;p__Proteobacteria;c__Betaproteobacteria;o__Neisseriales;f__Neisseriaceae;g__Neisseria;s__Neisseria lactamica	0.501305092	0.010683769	0.330015935	0.96
unclassified	k__Bacteria;p__Proteobacteria;c__Betaproteobacteria;o__Neisseriales;f__Neisseriaceae;g__Kingella;s__Kingella denitrificans	0.501305092	0.010683769	0.330015935	0.96
#N/A	k__Bacteria;p__Proteobacteria;c__Betaproteobacteria;o__Neisseriales;f__Neisseriaceae;g__Neisseria;s__Neisseria lactamica	0.501305092	0.010683769	0.330015935	0.96
#N/A	k__Bacteria;p__Proteobacteria;c__Betaproteobacteria;o__Neisseriales;f__Neisseriaceae;g__Kingella;s__Kingella denitrificans	0.501305092	0.010683769	0.330015935	0.96
#N/A	k__Bacteria;p__Proteobacteria;c__Betaproteobacteria;o__Neisseriales;f__Neisseriaceae;g__Neisseria;s__Neisseria elongata;t__Neisseria elongata subsp. glycolytica	0.501305092	0.010683769	0.330015935	0.96
#N/A	k__Bacteria;p__Proteobacteria;c__Alphaproteobacteria;o__Rhizobiales;f__Phyllobacteriaceae;g__Mesorhizobium;s__Mesorhizobium plurifarium	0.501305092	0.010683769	0.330015935	0.88
#N/A	k__Bacteria;p__Proteobacteria;c__Alphaproteobacteria;o__Rhodobacterales;f__Rhodobacteraceae;g__Thalassobacter;s__Thalassobacter stenotrophicus	0.501305092	0.010683769	0.330015935	0.88
#N/A	k__Bacteria;p__Proteobacteria;c__Betaproteobacteria;o__Neisseriales;f__Neisseriaceae;g__Neisseria;s__Neisseria elongata;t__Neisseria elongata subsp. glycolytica	0.501305092	0.010683769	0.330015935	0.96
Solanidines and derivatives	k__Bacteria;p__Proteobacteria;c__Betaproteobacteria;o__Neisseriales;f__Neisseriaceae;g__Neisseria;s__Neisseria elongata;t__Neisseria elongata subsp. glycolytica	0.501305092	0.010683769	0.330015935	0.96
Diphenylmethanes	k__Bacteria;p__Proteobacteria;c__Betaproteobacteria;o__Neisseriales;f__Neisseriaceae;g__Neisseria;s__Neisseria lactamica	0.501305092	0.010683769	0.330015935	0.96
Diphenylmethanes	k__Bacteria;p__Proteobacteria;c__Betaproteobacteria;o__Neisseriales;f__Neisseriaceae;g__Kingella;s__Kingella denitrificans	0.501305092	0.010683769	0.330015935	0.96
#N/A	k__Bacteria;p__Proteobacteria;c__Alphaproteobacteria;o__Rhizobiales;f__Phyllobacteriaceae;g__Mesorhizobium;s__Mesorhizobium plurifarium	0.501305092	0.010683769	0.330015935	0.88
#N/A	k__Bacteria;p__Proteobacteria;c__Alphaproteobacteria;o__Rhodobacterales;f__Rhodobacteraceae;g__Thalassobacter;s__Thalassobacter stenotrophicus	0.501305092	0.010683769	0.330015935	0.88
Trihydroxy bile acids, alcohols and derivatives	k__Bacteria;p__Proteobacteria;c__Alphaproteobacteria;o__Rhizobiales;f__Phyllobacteriaceae;g__Mesorhizobium;s__Mesorhizobium plurifarium	0.501305092	0.010683769	0.330015935	0.88
Trihydroxy bile acids, alcohols and derivatives	k__Bacteria;p__Proteobacteria;c__Alphaproteobacteria;o__Rhodobacterales;f__Rhodobacteraceae;g__Thalassobacter;s__Thalassobacter stenotrophicus	0.501305092	0.010683769	0.330015935	0.88
unclassified	k__Bacteria;p__Proteobacteria;c__Betaproteobacteria;o__Neisseriales;f__Neisseriaceae;g__Neisseria;s__Neisseria elongata;t__Neisseria elongata subsp. glycolytica	0.501305092	0.010683769	0.330015935	0.96
#N/A	k__Bacteria;p__Proteobacteria;c__Betaproteobacteria;o__Neisseriales;f__Neisseriaceae;g__Neisseria;s__Neisseria lactamica	0.501305092	0.010683769	0.330015935	0.96
#N/A	k__Bacteria;p__Proteobacteria;c__Betaproteobacteria;o__Neisseriales;f__Neisseriaceae;g__Kingella;s__Kingella denitrificans	0.501305092	0.010683769	0.330015935	0.96
unclassified	k__Bacteria;p__Proteobacteria;c__Alphaproteobacteria;o__Rhizobiales;f__Phyllobacteriaceae;g__Mesorhizobium;s__Mesorhizobium plurifarium	0.501305092	0.010683769	0.330015935	0.88
unclassified	k__Bacteria;p__Proteobacteria;c__Alphaproteobacteria;o__Rhodobacterales;f__Rhodobacteraceae;g__Thalassobacter;s__Thalassobacter stenotrophicus	0.501305092	0.010683769	0.330015935	0.88
#N/A	k__Bacteria;p__Proteobacteria;c__Alphaproteobacteria;o__Rhizobiales;f__Phyllobacteriaceae;g__Mesorhizobium;s__Mesorhizobium plurifarium	0.501305092	0.010683769	0.330015935	0.88
#N/A	k__Bacteria;p__Proteobacteria;c__Alphaproteobacteria;o__Rhodobacterales;f__Rhodobacteraceae;g__Thalassobacter;s__Thalassobacter stenotrophicus	0.501305092	0.010683769	0.330015935	0.88
#N/A	k__Bacteria;p__Proteobacteria;c__Betaproteobacteria;o__Neisseriales;f__Neisseriaceae;g__Neisseria;s__Neisseria elongata;t__Neisseria elongata subsp. glycolytica	0.501305092	0.010683769	0.330015935	0.96
unclassified	k__Bacteria;p__Proteobacteria;c__Betaproteobacteria;o__Neisseriales;f__Neisseriaceae;g__Neisseria;s__Neisseria lactamica	0.501305092	0.010683769	0.330015935	0.96
unclassified	k__Bacteria;p__Proteobacteria;c__Betaproteobacteria;o__Neisseriales;f__Neisseriaceae;g__Kingella;s__Kingella denitrificans	0.501305092	0.010683769	0.330015935	0.96
#N/A	k__Bacteria;p__Proteobacteria;c__Alphaproteobacteria;o__Rhizobiales;f__Phyllobacteriaceae;g__Mesorhizobium;s__Mesorhizobium plurifarium	0.501305092	0.010683769	0.330015935	0.88
#N/A	k__Bacteria;p__Proteobacteria;c__Alphaproteobacteria;o__Rhodobacterales;f__Rhodobacteraceae;g__Thalassobacter;s__Thalassobacter stenotrophicus	0.501305092	0.010683769	0.330015935	0.88
unclassified	k__Bacteria;p__Proteobacteria;c__Alphaproteobacteria;o__Rhizobiales;f__Phyllobacteriaceae;g__Mesorhizobium;s__Mesorhizobium plurifarium	0.501305092	0.010683769	0.330015935	0.88
unclassified	k__Bacteria;p__Proteobacteria;c__Alphaproteobacteria;o__Rhodobacterales;f__Rhodobacteraceae;g__Thalassobacter;s__Thalassobacter stenotrophicus	0.501305092	0.010683769	0.330015935	0.88
unclassified	k__Bacteria;p__Proteobacteria;c__Betaproteobacteria;o__Neisseriales;f__Neisseriaceae;g__Neisseria;s__Neisseria lactamica	0.501305092	0.010683769	0.330015935	0.96
unclassified	k__Bacteria;p__Proteobacteria;c__Betaproteobacteria;o__Neisseriales;f__Neisseriaceae;g__Kingella;s__Kingella denitrificans	0.501305092	0.010683769	0.330015935	0.96
Benzodioxoles	k__Bacteria;p__Proteobacteria;c__Betaproteobacteria;o__Neisseriales;f__Neisseriaceae;g__Neisseria;s__Neisseria lactamica	0.501305092	0.010683769	0.330015935	0.96
Benzodioxoles	k__Bacteria;p__Proteobacteria;c__Betaproteobacteria;o__Neisseriales;f__Neisseriaceae;g__Kingella;s__Kingella denitrificans	0.501305092	0.010683769	0.330015935	0.96
1-acyl-sn-glycero-3-phosphocholines	k__Bacteria;p__Proteobacteria;c__Alphaproteobacteria;o__Rhizobiales;f__Phyllobacteriaceae;g__Mesorhizobium;s__Mesorhizobium plurifarium	0.501305092	0.010683769	0.330015935	0.88
1-acyl-sn-glycero-3-phosphocholines	k__Bacteria;p__Proteobacteria;c__Alphaproteobacteria;o__Rhodobacterales;f__Rhodobacteraceae;g__Thalassobacter;s__Thalassobacter stenotrophicus	0.501305092	0.010683769	0.330015935	0.88
unclassified	k__Bacteria;p__Proteobacteria;c__Betaproteobacteria;o__Neisseriales;f__Neisseriaceae;g__Neisseria;s__Neisseria elongata;t__Neisseria elongata subsp. glycolytica	0.501305092	0.010683769	0.330015935	0.96
#N/A	k__Bacteria;p__Proteobacteria;c__Betaproteobacteria;o__Neisseriales;f__Neisseriaceae;g__Neisseria;s__Neisseria lactamica	0.501305092	0.010683769	0.330015935	0.96
#N/A	k__Bacteria;p__Proteobacteria;c__Betaproteobacteria;o__Neisseriales;f__Neisseriaceae;g__Kingella;s__Kingella denitrificans	0.501305092	0.010683769	0.330015935	0.96
unclassified	k__Bacteria;p__Proteobacteria;c__Betaproteobacteria;o__Neisseriales;f__Neisseriaceae;g__Neisseria;s__Neisseria lactamica	0.501305092	0.010683769	0.330015935	0.96
unclassified	k__Bacteria;p__Proteobacteria;c__Betaproteobacteria;o__Neisseriales;f__Neisseriaceae;g__Kingella;s__Kingella denitrificans	0.501305092	0.010683769	0.330015935	0.96
#N/A	k__Bacteria;p__Proteobacteria;c__Betaproteobacteria;o__Neisseriales;f__Neisseriaceae;g__Neisseria;s__Neisseria lactamica	0.501305092	0.010683769	0.330015935	0.96
#N/A	k__Bacteria;p__Proteobacteria;c__Betaproteobacteria;o__Neisseriales;f__Neisseriaceae;g__Kingella;s__Kingella denitrificans	0.501305092	0.010683769	0.330015935	0.96
#N/A	k__Bacteria;p__Proteobacteria;c__Betaproteobacteria;o__Neisseriales;f__Neisseriaceae;g__Neisseria;s__Neisseria lactamica	0.501305092	0.010683769	0.330015935	0.96
#N/A	k__Bacteria;p__Proteobacteria;c__Betaproteobacteria;o__Neisseriales;f__Neisseriaceae;g__Kingella;s__Kingella denitrificans	0.501305092	0.010683769	0.330015935	0.96
#N/A	k__Bacteria;p__Proteobacteria;c__Betaproteobacteria;o__Neisseriales;f__Neisseriaceae;g__Neisseria;s__Neisseria lactamica	0.501305092	0.010683769	0.330015935	0.96
#N/A	k__Bacteria;p__Proteobacteria;c__Betaproteobacteria;o__Neisseriales;f__Neisseriaceae;g__Kingella;s__Kingella denitrificans	0.501305092	0.010683769	0.330015935	0.96
unclassified	k__Bacteria;p__Proteobacteria;c__Betaproteobacteria;o__Neisseriales;f__Neisseriaceae;g__Neisseria;s__Neisseria lactamica	0.501305092	0.010683769	0.330015935	0.96
unclassified	k__Bacteria;p__Proteobacteria;c__Betaproteobacteria;o__Neisseriales;f__Neisseriaceae;g__Kingella;s__Kingella denitrificans	0.501305092	0.010683769	0.330015935	0.96
#N/A	k__Bacteria;p__Proteobacteria;c__Betaproteobacteria;o__Neisseriales;f__Neisseriaceae;g__Neisseria;s__Neisseria lactamica	0.501305092	0.010683769	0.330015935	0.96
#N/A	k__Bacteria;p__Proteobacteria;c__Betaproteobacteria;o__Neisseriales;f__Neisseriaceae;g__Kingella;s__Kingella denitrificans	0.501305092	0.010683769	0.330015935	0.96
#N/A	k__Bacteria;p__Proteobacteria;c__Betaproteobacteria;o__Neisseriales;f__Neisseriaceae;g__Neisseria;s__Neisseria lactamica	0.501305092	0.010683769	0.330015935	0.96
#N/A	k__Bacteria;p__Proteobacteria;c__Betaproteobacteria;o__Neisseriales;f__Neisseriaceae;g__Kingella;s__Kingella denitrificans	0.501305092	0.010683769	0.330015935	0.96
unclassified	k__Bacteria;p__Proteobacteria;c__Alphaproteobacteria;o__Rhizobiales;f__Phyllobacteriaceae;g__Mesorhizobium;s__Mesorhizobium plurifarium	0.501305092	0.010683769	0.330015935	0.88
unclassified	k__Bacteria;p__Proteobacteria;c__Alphaproteobacteria;o__Rhodobacterales;f__Rhodobacteraceae;g__Thalassobacter;s__Thalassobacter stenotrophicus	0.501305092	0.010683769	0.330015935	0.88
unclassified	k__Bacteria;p__Proteobacteria;c__Betaproteobacteria;o__Neisseriales;f__Neisseriaceae;g__Neisseria;s__Neisseria elongata;t__Neisseria elongata subsp. glycolytica	0.501305092	0.010683769	0.330015935	0.96
unclassified	k__Bacteria;p__Proteobacteria;c__Betaproteobacteria;o__Neisseriales;f__Neisseriaceae;g__Neisseria;s__Neisseria elongata;t__Neisseria elongata subsp. glycolytica	0.501305092	0.010683769	0.330015935	0.96
unclassified	k__Bacteria;p__Proteobacteria;c__Betaproteobacteria;o__Neisseriales;f__Neisseriaceae;g__Neisseria;s__Neisseria elongata;t__Neisseria elongata subsp. glycolytica	0.501305092	0.010683769	0.330015935	0.96
#N/A	k__Bacteria;p__Proteobacteria;c__Alphaproteobacteria;o__Rhizobiales;f__Phyllobacteriaceae;g__Mesorhizobium;s__Mesorhizobium plurifarium	0.501305092	0.010683769	0.330015935	0.88
#N/A	k__Bacteria;p__Proteobacteria;c__Alphaproteobacteria;o__Rhodobacterales;f__Rhodobacteraceae;g__Thalassobacter;s__Thalassobacter stenotrophicus	0.501305092	0.010683769	0.330015935	0.88
Steroid esters	k__Bacteria;p__Proteobacteria;c__Betaproteobacteria;o__Neisseriales;f__Neisseriaceae;g__Neisseria;s__Neisseria elongata;t__Neisseria elongata subsp. glycolytica	0.501305092	0.010683769	0.330015935	0.96
unclassified	k__Bacteria;p__Proteobacteria;c__Betaproteobacteria;o__Neisseriales;f__Neisseriaceae;g__Neisseria;s__Neisseria elongata;t__Neisseria elongata subsp. glycolytica	0.501305092	0.010683769	0.330015935	0.96
Acyl carnitines	k__Bacteria;p__Proteobacteria;c__Alphaproteobacteria;o__Rhizobiales;f__Phyllobacteriaceae;g__Mesorhizobium;s__Mesorhizobium plurifarium	0.501305092	0.010683769	0.330015935	0.88
Acyl carnitines	k__Bacteria;p__Proteobacteria;c__Alphaproteobacteria;o__Rhodobacterales;f__Rhodobacteraceae;g__Thalassobacter;s__Thalassobacter stenotrophicus	0.501305092	0.010683769	0.330015935	0.88
unclassified	k__Bacteria;p__Proteobacteria;c__Betaproteobacteria;o__Neisseriales;f__Neisseriaceae;g__Neisseria;s__Neisseria lactamica	0.501305092	0.010683769	0.330015935	0.96
unclassified	k__Bacteria;p__Proteobacteria;c__Betaproteobacteria;o__Neisseriales;f__Neisseriaceae;g__Kingella;s__Kingella denitrificans	0.501305092	0.010683769	0.330015935	0.96
Quinoline carboxylic acids	k__Bacteria;p__Proteobacteria;c__Betaproteobacteria;o__Neisseriales;f__Neisseriaceae;g__Neisseria;s__Neisseria lactamica	0.501305092	0.010683769	0.330015935	0.96
Quinoline carboxylic acids	k__Bacteria;p__Proteobacteria;c__Betaproteobacteria;o__Neisseriales;f__Neisseriaceae;g__Kingella;s__Kingella denitrificans	0.501305092	0.010683769	0.330015935	0.96
#N/A	k__Bacteria;p__Proteobacteria;c__Betaproteobacteria;o__Rhodocyclales;f__Rhodocyclaceae;g__;s__Rhodocyclaceae bacterium Paddy-1	0.500685524	0.010796555	0.330015935	0.8
Isocopalane and spongiane diterpenoids	k__Bacteria;p__Proteobacteria;c__Deltaproteobacteria;o__Desulfovibrionales;f__Desulfovibrionaceae;g__Lawsonia;s__Lawsonia intracellularis	0.500217819	0.010882348	0.330015935	0.64
unclassified	k__Bacteria;p__Proteobacteria;c__Deltaproteobacteria;o__Myxococcales;f__Polyangiaceae;g__Chondromyces;s__Chondromyces apiculatus	0.5	0.010922496	0.330015935	0.92
unclassified	k__Bacteria;p__Proteobacteria;c__Deltaproteobacteria;o__Myxococcales;f__Polyangiaceae;g__Chondromyces;s__Chondromyces apiculatus	0.5	0.010922496	0.330015935	0.92
#N/A	k__Bacteria;p__Proteobacteria;c__Deltaproteobacteria;o__Myxococcales;f__Polyangiaceae;g__Chondromyces;s__Chondromyces apiculatus	0.5	0.010922496	0.330015935	0.92
#N/A	k__Bacteria;p__Proteobacteria;c__Gammaproteobacteria;o__Thiotrichales;f__Francisellaceae;g__Francisella;s__Francisella tularensis;t__Francisella tularensis subsp. holarctica	0.5	0.010922496	0.330015935	0.92
#N/A	k__Bacteria;p__Proteobacteria;c__Deltaproteobacteria;o__Myxococcales;f__Polyangiaceae;g__Chondromyces;s__Chondromyces apiculatus	0.5	0.010922496	0.330015935	0.92
#N/A	k__Bacteria;p__Proteobacteria;c__Gammaproteobacteria;o__Thiotrichales;f__Francisellaceae;g__Francisella;s__Francisella sp. W12-1067	0.5	0.010922496	0.330015935	0.92
Monohydroxy bile acids, alcohols and derivatives	k__Bacteria;p__Proteobacteria;c__Gammaproteobacteria;o__Thiotrichales;f__Francisellaceae;g__Francisella;s__Francisella tularensis;t__Francisella tularensis subsp. holarctica	0.5	0.010922496	0.330015935	0.92
Monohydroxy bile acids, alcohols and derivatives	k__Bacteria;p__Proteobacteria;c__Deltaproteobacteria;o__Myxococcales;f__Polyangiaceae;g__Chondromyces;s__Chondromyces apiculatus	0.5	0.010922496	0.330015935	0.92
Monohydroxy bile acids, alcohols and derivatives	k__Bacteria;p__Proteobacteria;c__Gammaproteobacteria;o__Thiotrichales;f__Francisellaceae;g__Francisella;s__Francisella sp. W12-1067	0.5	0.010922496	0.330015935	0.92
unclassified	k__Bacteria;p__Proteobacteria;c__Gammaproteobacteria;o__Thiotrichales;f__Francisellaceae;g__Francisella;s__Francisella tularensis;t__Francisella tularensis subsp. holarctica	0.5	0.010922496	0.330015935	0.92
unclassified	k__Bacteria;p__Proteobacteria;c__Deltaproteobacteria;o__Myxococcales;f__Polyangiaceae;g__Chondromyces;s__Chondromyces apiculatus	0.5	0.010922496	0.330015935	0.92
unclassified	k__Bacteria;p__Proteobacteria;c__Gammaproteobacteria;o__Thiotrichales;f__Francisellaceae;g__Francisella;s__Francisella sp. W12-1067	0.5	0.010922496	0.330015935	0.92
unclassified	k__Bacteria;p__Proteobacteria;c__Deltaproteobacteria;o__Myxococcales;f__Polyangiaceae;g__Chondromyces;s__Chondromyces apiculatus	0.5	0.010922496	0.330015935	0.92
unclassified	k__Bacteria;p__Proteobacteria;c__Gammaproteobacteria;o__Thiotrichales;f__Francisellaceae;g__Francisella;s__Francisella tularensis;t__Francisella tularensis subsp. holarctica	0.5	0.010922496	0.330015935	0.92
unclassified	k__Bacteria;p__Proteobacteria;c__Deltaproteobacteria;o__Myxococcales;f__Polyangiaceae;g__Chondromyces;s__Chondromyces apiculatus	0.5	0.010922496	0.330015935	0.92
unclassified	k__Bacteria;p__Proteobacteria;c__Gammaproteobacteria;o__Thiotrichales;f__Francisellaceae;g__Francisella;s__Francisella sp. W12-1067	0.5	0.010922496	0.330015935	0.92
unclassified	k__Bacteria;p__Proteobacteria;c__Gammaproteobacteria;o__Thiotrichales;f__Francisellaceae;g__Francisella;s__Francisella tularensis;t__Francisella tularensis subsp. holarctica	0.5	0.010922496	0.330015935	0.92
unclassified	k__Bacteria;p__Proteobacteria;c__Deltaproteobacteria;o__Myxococcales;f__Polyangiaceae;g__Chondromyces;s__Chondromyces apiculatus	0.5	0.010922496	0.330015935	0.92
unclassified	k__Bacteria;p__Proteobacteria;c__Gammaproteobacteria;o__Thiotrichales;f__Francisellaceae;g__Francisella;s__Francisella sp. W12-1067	0.5	0.010922496	0.330015935	0.92
unclassified	k__Bacteria;p__Proteobacteria;c__Gammaproteobacteria;o__Thiotrichales;f__Francisellaceae;g__Francisella;s__Francisella tularensis;t__Francisella tularensis subsp. holarctica	0.5	0.010922496	0.330015935	0.92
unclassified	k__Bacteria;p__Proteobacteria;c__Deltaproteobacteria;o__Myxococcales;f__Polyangiaceae;g__Chondromyces;s__Chondromyces apiculatus	0.5	0.010922496	0.330015935	0.92
unclassified	k__Bacteria;p__Proteobacteria;c__Gammaproteobacteria;o__Thiotrichales;f__Francisellaceae;g__Francisella;s__Francisella sp. W12-1067	0.5	0.010922496	0.330015935	0.92
Phenylacetamides	k__Bacteria;p__Proteobacteria;c__Gammaproteobacteria;o__Thiotrichales;f__Francisellaceae;g__Francisella;s__Francisella tularensis;t__Francisella tularensis subsp. holarctica	0.5	0.010922496	0.330015935	0.92
Phenylacetamides	k__Bacteria;p__Proteobacteria;c__Deltaproteobacteria;o__Myxococcales;f__Polyangiaceae;g__Chondromyces;s__Chondromyces apiculatus	0.5	0.010922496	0.330015935	0.92
Phenylacetamides	k__Bacteria;p__Proteobacteria;c__Gammaproteobacteria;o__Thiotrichales;f__Francisellaceae;g__Francisella;s__Francisella sp. W12-1067	0.5	0.010922496	0.330015935	0.92
unclassified	k__Bacteria;p__Proteobacteria;c__Deltaproteobacteria;o__Desulfovibrionales;f__Desulfovibrionaceae;g__Lawsonia;s__Lawsonia intracellularis	0.499821769	0.010955439	0.330740284	0.88
Diterpenoids	k__Bacteria;p__Proteobacteria;c__Betaproteobacteria;o__Burkholderiales;f__Comamonadaceae;g__Ottowia;s__Ottowia thiooxydans	0.498621543	0.011179425	0.335898281	0.8
Isocopalane and spongiane diterpenoids	k__Bacteria;p__Proteobacteria;c__Deltaproteobacteria;o__Desulfovibrionales;f__Desulfovibrionaceae;g__Lawsonia;s__Lawsonia intracellularis	0.498455574	0.011210694	0.336737208	0.64
unclassified	k__Bacteria;p__Proteobacteria;c__Betaproteobacteria;o__Burkholderiales;f__Alcaligenaceae;g__Oligella;s__Oligella ureolytica	0.498110907	0.011275862	0.33695736	0.84
#N/A	k__Bacteria;p__Proteobacteria;c__Deltaproteobacteria;o__Myxococcales;f__Polyangiaceae;g__Chondromyces;s__Chondromyces apiculatus	0.498077011	0.011282288	0.33695736	0.8
unclassified	k__Bacteria;p__Proteobacteria;c__Gammaproteobacteria;o__Thiotrichales;f__Francisellaceae;g__Francisella;s__Francisella tularensis;t__Francisella tularensis subsp. holarctica	0.498077011	0.011282288	0.33695736	0.8
unclassified	k__Bacteria;p__Proteobacteria;c__Gammaproteobacteria;o__Thiotrichales;f__Francisellaceae;g__Francisella;s__Francisella sp. W12-1067	0.498077011	0.011282288	0.33695736	0.8
unclassified	k__Bacteria;p__Proteobacteria;c__Gammaproteobacteria;o__Thiotrichales;f__Francisellaceae;g__Francisella;s__Francisella tularensis;t__Francisella tularensis subsp. holarctica	0.498077011	0.011282288	0.33695736	0.8
unclassified	k__Bacteria;p__Proteobacteria;c__Gammaproteobacteria;o__Thiotrichales;f__Francisellaceae;g__Francisella;s__Francisella sp. W12-1067	0.498077011	0.011282288	0.33695736	0.8
Indole-3-acetic acid derivatives	k__Bacteria;p__Proteobacteria;c__Deltaproteobacteria;o__Desulfovibrionales;f__Desulfovibrionaceae;g__Lawsonia;s__Lawsonia intracellularis	0.497354419	0.011419996	0.339849945	0.76
#N/A	k__Bacteria;p__Proteobacteria;c__Betaproteobacteria;o__Burkholderiales;f__Comamonadaceae;g__Ottowia;s__Ottowia thiooxydans	0.49713388	0.011462301	0.340590071	0.68
#N/A	k__Bacteria;p__Proteobacteria;c__Betaproteobacteria;o__Neisseriales;f__Neisseriaceae;g__Neisseria;s__Neisseria mucosa	0.497103565	0.011468127	0.340677451	0.92
Acyl carnitines	k__Bacteria;p__Proteobacteria;c__Betaproteobacteria;o__Neisseriales;f__Neisseriaceae;g__Neisseria;s__Neisseria mucosa	0.497103565	0.011468127	0.340677451	0.92
#N/A	k__Bacteria;p__Proteobacteria;c__Betaproteobacteria;o__Neisseriales;f__Neisseriaceae;g__Neisseria;s__Neisseria mucosa	0.497103565	0.011468127	0.340677451	0.92
unclassified	k__Bacteria;p__Proteobacteria;c__Deltaproteobacteria;o__Desulfovibrionales;f__Desulfovibrionaceae;g__Lawsonia;s__Lawsonia intracellularis	0.496620661	0.011561252	0.342712927	0.92
Hypoxanthines	k__Bacteria;p__Proteobacteria;c__Deltaproteobacteria;o__Desulfovibrionales;f__Desulfovibrionaceae;g__Lawsonia;s__Lawsonia intracellularis	0.496620661	0.011561252	0.342712927	0.92
#N/A	k__Bacteria;p__Proteobacteria;c__Deltaproteobacteria;o__Desulfovibrionales;f__Desulfovibrionaceae;g__Lawsonia;s__Lawsonia intracellularis	0.496620661	0.011561252	0.342712927	0.92
unclassified	k__Bacteria;p__Proteobacteria;c__Deltaproteobacteria;o__Desulfovibrionales;f__Desulfovibrionaceae;g__Lawsonia;s__Lawsonia intracellularis	0.496620661	0.011561252	0.342712927	0.92
#N/A	k__Bacteria;p__Proteobacteria;c__Deltaproteobacteria;o__Desulfovibrionales;f__Desulfovibrionaceae;g__Lawsonia;s__Lawsonia intracellularis	0.496620661	0.011561252	0.342712927	0.92
unclassified	k__Bacteria;p__Proteobacteria;c__Deltaproteobacteria;o__Desulfovibrionales;f__Desulfovibrionaceae;g__Lawsonia;s__Lawsonia intracellularis	0.496620661	0.011561252	0.342712927	0.92
#N/A	k__Bacteria;p__Proteobacteria;c__Gammaproteobacteria;o__Thiotrichales;f__Francisellaceae;g__Francisella;s__Francisella tularensis;t__Francisella tularensis subsp. holarctica	0.496608545	0.011563597	0.342712927	0.56
#N/A	k__Bacteria;p__Proteobacteria;c__Gammaproteobacteria;o__Thiotrichales;f__Francisellaceae;g__Francisella;s__Francisella sp. W12-1067	0.496608545	0.011563597	0.342712927	0.56
#N/A	k__Bacteria;p__Proteobacteria;c__Gammaproteobacteria;o__Thiotrichales;f__Francisellaceae;g__Francisella;s__Francisella tularensis;t__Francisella tularensis subsp. holarctica	0.496373568	0.011609144	0.343685343	0.64
#N/A	k__Bacteria;p__Proteobacteria;c__Gammaproteobacteria;o__Thiotrichales;f__Francisellaceae;g__Francisella;s__Francisella sp. W12-1067	0.496373568	0.011609144	0.343685343	0.64
Pyrazines	k__Bacteria;p__Proteobacteria;c__Betaproteobacteria;o__Burkholderiales;f__Comamonadaceae;g__Ottowia;s__Ottowia thiooxydans	0.495933909	0.011694765	0.345840696	0.92
unclassified	k__Bacteria;p__Proteobacteria;c__Gammaproteobacteria;o__Thiotrichales;f__Francisellaceae;g__Francisella;s__Francisella tularensis;t__Francisella tularensis subsp. holarctica	0.495225518	0.011833819	0.3486182	0.72
unclassified	k__Bacteria;p__Proteobacteria;c__Gammaproteobacteria;o__Thiotrichales;f__Francisellaceae;g__Francisella;s__Francisella sp. W12-1067	0.495225518	0.011833819	0.3486182	0.72
Phenylmethylamines	k__Bacteria;p__Proteobacteria;c__Betaproteobacteria;o__Neisseriales;f__Neisseriaceae;g__Neisseria;s__Neisseria mucosa	0.495168099	0.011845149	0.348851236	0.76
#N/A	k__Bacteria;p__Proteobacteria;c__Gammaproteobacteria;o__Pasteurellales;f__Pasteurellaceae;g__Mannheimia;s__Mannheimia haemolytica	0.495013926	0.011875617	0.349265696	0.4
#N/A	k__Bacteria;p__Proteobacteria;c__Gammaproteobacteria;o__Chromatiales;f__Chromatiaceae;g__Rheinheimera;s__Rheinheimera perlucida	0.494074283	0.012062714	0.353818283	0.36
Acylaminosugars	k__Bacteria;p__Proteobacteria;c__Betaproteobacteria;o__Burkholderiales;f__Alcaligenaceae;g__Oligella;s__Oligella ureolytica	0.493132691	0.012252635	0.35791224	0.76
1-hydroxy-2-unsubstituted benzenoids	k__Bacteria;p__Proteobacteria;c__Betaproteobacteria;o__Burkholderiales;f__Comamonadaceae;g__Ottowia;s__Ottowia thiooxydans	0.493107561	0.012257737	0.358019904	0.8
#N/A	k__Bacteria;p__Proteobacteria;c__Betaproteobacteria;o__Burkholderiales;f__Comamonadaceae;g__Ottowia;s__Ottowia thiooxydans	0.492319849	0.012418567	0.360842295	0.8
unclassified	k__Bacteria;p__Proteobacteria;c__Gammaproteobacteria;o__Pasteurellales;f__Pasteurellaceae;g__Mannheimia;s__Mannheimia haemolytica	0.491809372	0.012523719	0.360842295	0.68
unclassified	k__Bacteria;p__Proteobacteria;c__Deltaproteobacteria;o__Desulfovibrionales;f__Desulfovibrionaceae;g__Lawsonia;s__Lawsonia intracellularis	0.490696756	0.012755454	0.360842295	0.92
#N/A	k__Bacteria;p__Proteobacteria;c__Deltaproteobacteria;o__Desulfovibrionales;f__Desulfovibrionaceae;g__Lawsonia;s__Lawsonia intracellularis	0.490696756	0.012755454	0.360842295	0.92
unclassified	k__Bacteria;p__Proteobacteria;c__Deltaproteobacteria;o__Desulfovibrionales;f__Desulfovibrionaceae;g__Lawsonia;s__Lawsonia intracellularis	0.490696756	0.012755454	0.360842295	0.92
Hypoxanthines	k__Bacteria;p__Proteobacteria;c__Deltaproteobacteria;o__Desulfovibrionales;f__Desulfovibrionaceae;g__Lawsonia;s__Lawsonia intracellularis	0.490696756	0.012755454	0.360842295	0.92
unclassified	k__Bacteria;p__Proteobacteria;c__Deltaproteobacteria;o__Desulfovibrionales;f__Desulfovibrionaceae;g__Lawsonia;s__Lawsonia intracellularis	0.490696756	0.012755454	0.360842295	0.92
unclassified	k__Bacteria;p__Proteobacteria;c__Deltaproteobacteria;o__Desulfovibrionales;f__Desulfovibrionaceae;g__Lawsonia;s__Lawsonia intracellularis	0.490696756	0.012755454	0.360842295	0.92
unclassified	k__Bacteria;p__Proteobacteria;c__Deltaproteobacteria;o__Desulfovibrionales;f__Desulfovibrionaceae;g__Lawsonia;s__Lawsonia intracellularis	0.490696756	0.012755454	0.360842295	0.92
unclassified	k__Bacteria;p__Proteobacteria;c__Betaproteobacteria;o__Burkholderiales;f__Comamonadaceae;g__Ottowia;s__Ottowia thiooxydans	0.490410668	0.012815609	0.360842295	0.88
Hydroquinolones	k__Bacteria;p__Proteobacteria;c__Gammaproteobacteria;o__Enterobacterales;f__Yersiniaceae;g__Yersinia;s__Yersinia pestis	0.490367666	0.012824671	0.360842295	0.92
#N/A	k__Bacteria;p__Proteobacteria;c__Betaproteobacteria;o__Rhodocyclales;f__Rhodocyclaceae;g__;s__Rhodocyclaceae bacterium Paddy-1	0.489378883	0.013034505	0.360842295	0.36
#N/A	k__Bacteria;p__Proteobacteria;c__Deltaproteobacteria;o__Desulfovibrionales;f__Desulfovibrionaceae;g__Lawsonia;s__Lawsonia intracellularis	0.489342245	0.013042334	0.360842295	0.6
unclassified	k__Bacteria;p__Proteobacteria;c__Betaproteobacteria;o__Burkholderiales;f__Comamonadaceae;g__Delftia;s__Delftia acidovorans	0.489325105	0.013045998	0.360842295	0.84
1-acyl-sn-glycero-3-phosphocholines	k__Bacteria;p__Proteobacteria;c__Deltaproteobacteria;o__Desulfovibrionales;f__Desulfovibrionaceae;g__Lawsonia;s__Lawsonia intracellularis	0.489263293	0.013059218	0.360842295	0.88
1-acyl-sn-glycero-3-phosphocholines	k__Bacteria;p__Proteobacteria;c__Deltaproteobacteria;o__Desulfovibrionales;f__Desulfovibrionaceae;g__Lawsonia;s__Lawsonia intracellularis	0.489125994	0.013088624	0.360842295	0.88
unclassified	k__Bacteria;p__Proteobacteria;c__Gammaproteobacteria;o__Thiotrichales;f__Francisellaceae;g__Francisella;s__Francisella tularensis;t__Francisella tularensis subsp. holarctica	0.489035199	0.013108099	0.360842295	0.72
unclassified	k__Bacteria;p__Proteobacteria;c__Gammaproteobacteria;o__Thiotrichales;f__Francisellaceae;g__Francisella;s__Francisella sp. W12-1067	0.489035199	0.013108099	0.360842295	0.72
unclassified	k__Bacteria;p__Proteobacteria;c__Gammaproteobacteria;o__Thiotrichales;f__Francisellaceae;g__Francisella;s__Francisella tularensis;t__Francisella tularensis subsp. holarctica	0.489035199	0.013108099	0.360842295	0.72
unclassified	k__Bacteria;p__Proteobacteria;c__Gammaproteobacteria;o__Thiotrichales;f__Francisellaceae;g__Francisella;s__Francisella sp. W12-1067	0.489035199	0.013108099	0.360842295	0.72
#N/A	k__Bacteria;p__Proteobacteria;c__Deltaproteobacteria;o__Desulfovibrionales;f__Desulfovibrionaceae;g__Lawsonia;s__Lawsonia intracellularis	0.488430345	0.013238451	0.360842295	0.6
Medium-chain fatty acids	k__Bacteria;p__Proteobacteria;c__Deltaproteobacteria;o__Desulfovibrionales;f__Desulfovibrionaceae;g__Lawsonia;s__Lawsonia intracellularis	0.487715208	0.013393945	0.360842295	0.8
#N/A	k__Bacteria;p__Proteobacteria;c__Alphaproteobacteria;o__Rhizobiales;f__Phyllobacteriaceae;g__Mesorhizobium;s__Mesorhizobium plurifarium	0.487662245	0.013405521	0.360842295	0.84
#N/A	k__Bacteria;p__Proteobacteria;c__Alphaproteobacteria;o__Rhodobacterales;f__Rhodobacteraceae;g__Thalassobacter;s__Thalassobacter stenotrophicus	0.487662245	0.013405521	0.360842295	0.84
Bile acids, alcohols and derivatives	k__Bacteria;p__Proteobacteria;c__Alphaproteobacteria;o__Rhizobiales;f__Phyllobacteriaceae;g__Mesorhizobium;s__Mesorhizobium plurifarium	0.487662245	0.013405521	0.360842295	0.84
Bile acids, alcohols and derivatives	k__Bacteria;p__Proteobacteria;c__Alphaproteobacteria;o__Rhodobacterales;f__Rhodobacteraceae;g__Thalassobacter;s__Thalassobacter stenotrophicus	0.487662245	0.013405521	0.360842295	0.84
#N/A	k__Bacteria;p__Proteobacteria;c__Alphaproteobacteria;o__Rhizobiales;f__Phyllobacteriaceae;g__Mesorhizobium;s__Mesorhizobium plurifarium	0.487662245	0.013405521	0.360842295	0.84
#N/A	k__Bacteria;p__Proteobacteria;c__Alphaproteobacteria;o__Rhodobacterales;f__Rhodobacteraceae;g__Thalassobacter;s__Thalassobacter stenotrophicus	0.487662245	0.013405521	0.360842295	0.84
unclassified	k__Bacteria;p__Proteobacteria;c__Alphaproteobacteria;o__Rhizobiales;f__Phyllobacteriaceae;g__Mesorhizobium;s__Mesorhizobium plurifarium	0.487662245	0.013405521	0.360842295	0.84
unclassified	k__Bacteria;p__Proteobacteria;c__Alphaproteobacteria;o__Rhodobacterales;f__Rhodobacteraceae;g__Thalassobacter;s__Thalassobacter stenotrophicus	0.487662245	0.013405521	0.360842295	0.84
unclassified	k__Bacteria;p__Proteobacteria;c__Alphaproteobacteria;o__Rhizobiales;f__Phyllobacteriaceae;g__Mesorhizobium;s__Mesorhizobium plurifarium	0.487662245	0.013405521	0.360842295	0.84
unclassified	k__Bacteria;p__Proteobacteria;c__Alphaproteobacteria;o__Rhodobacterales;f__Rhodobacteraceae;g__Thalassobacter;s__Thalassobacter stenotrophicus	0.487662245	0.013405521	0.360842295	0.84
#N/A	k__Bacteria;p__Proteobacteria;c__Alphaproteobacteria;o__Rhizobiales;f__Phyllobacteriaceae;g__Mesorhizobium;s__Mesorhizobium plurifarium	0.487662245	0.013405521	0.360842295	0.84
#N/A	k__Bacteria;p__Proteobacteria;c__Alphaproteobacteria;o__Rhodobacterales;f__Rhodobacteraceae;g__Thalassobacter;s__Thalassobacter stenotrophicus	0.487662245	0.013405521	0.360842295	0.84
Dipeptides	k__Bacteria;p__Proteobacteria;c__Betaproteobacteria;o__Burkholderiales;f__Comamonadaceae;g__Delftia;s__Delftia acidovorans	0.487270607	0.013491373	0.360842295	0.92
Monohydroxy bile acids, alcohols and derivatives	k__Bacteria;p__Proteobacteria;c__Gammaproteobacteria;o__Thiotrichales;f__Francisellaceae;g__Francisella;s__Francisella tularensis;t__Francisella tularensis subsp. holarctica	0.487088187	0.013531516	0.360842295	0.6
Monohydroxy bile acids, alcohols and derivatives	k__Bacteria;p__Proteobacteria;c__Gammaproteobacteria;o__Thiotrichales;f__Francisellaceae;g__Francisella;s__Francisella sp. W12-1067	0.487088187	0.013531516	0.360842295	0.6
#N/A	k__Bacteria;p__Proteobacteria;c__Deltaproteobacteria;o__Desulfovibrionales;f__Desulfovibrionaceae;g__Lawsonia;s__Lawsonia intracellularis	0.487050293	0.013539867	0.360842295	0.8
#N/A	k__Bacteria;p__Proteobacteria;c__Deltaproteobacteria;o__Desulfovibrionales;f__Desulfovibrionaceae;g__Lawsonia;s__Lawsonia intracellularis	0.486913615	0.013570024	0.360842295	0.8
unclassified	k__Bacteria;p__Proteobacteria;c__Deltaproteobacteria;o__Myxococcales;f__Polyangiaceae;g__Chondromyces;s__Chondromyces apiculatus	0.486348061	0.013695397	0.360842295	0.76
unclassified	k__Bacteria;p__Proteobacteria;c__Betaproteobacteria;o__Burkholderiales;f__Comamonadaceae;g__Ottowia;s__Ottowia thiooxydans	0.486216638	0.013724667	0.360842295	0.96
unclassified	k__Bacteria;p__Proteobacteria;c__Betaproteobacteria;o__Neisseriales;f__Neisseriaceae;g__Neisseria;s__Neisseria mucosa	0.486216638	0.013724667	0.360842295	0.96
unclassified	k__Bacteria;p__Proteobacteria;c__Betaproteobacteria;o__Burkholderiales;f__Comamonadaceae;g__Ottowia;s__Ottowia thiooxydans	0.486216638	0.013724667	0.360842295	0.96
unclassified	k__Bacteria;p__Proteobacteria;c__Betaproteobacteria;o__Neisseriales;f__Neisseriaceae;g__Neisseria;s__Neisseria mucosa	0.486216638	0.013724667	0.360842295	0.96
N-acyl amines	k__Bacteria;p__Proteobacteria;c__Betaproteobacteria;o__Burkholderiales;f__Comamonadaceae;g__Ottowia;s__Ottowia thiooxydans	0.486216638	0.013724667	0.360842295	0.96
N-acyl amines	k__Bacteria;p__Proteobacteria;c__Betaproteobacteria;o__Neisseriales;f__Neisseriaceae;g__Neisseria;s__Neisseria mucosa	0.486216638	0.013724667	0.360842295	0.96
#N/A	k__Bacteria;p__Proteobacteria;c__Betaproteobacteria;o__Burkholderiales;f__Comamonadaceae;g__Ottowia;s__Ottowia thiooxydans	0.486216638	0.013724667	0.360842295	0.96
#N/A	k__Bacteria;p__Proteobacteria;c__Betaproteobacteria;o__Neisseriales;f__Neisseriaceae;g__Neisseria;s__Neisseria mucosa	0.486216638	0.013724667	0.360842295	0.96
Long-chain fatty acids	k__Bacteria;p__Proteobacteria;c__Betaproteobacteria;o__Burkholderiales;f__Comamonadaceae;g__Ottowia;s__Ottowia thiooxydans	0.486216638	0.013724667	0.360842295	0.96
Long-chain fatty acids	k__Bacteria;p__Proteobacteria;c__Betaproteobacteria;o__Neisseriales;f__Neisseriaceae;g__Neisseria;s__Neisseria mucosa	0.486216638	0.013724667	0.360842295	0.96
unclassified	k__Bacteria;p__Proteobacteria;c__Betaproteobacteria;o__Burkholderiales;f__Comamonadaceae;g__Ottowia;s__Ottowia thiooxydans	0.486216638	0.013724667	0.360842295	0.96
unclassified	k__Bacteria;p__Proteobacteria;c__Betaproteobacteria;o__Neisseriales;f__Neisseriaceae;g__Neisseria;s__Neisseria mucosa	0.486216638	0.013724667	0.360842295	0.96
Long-chain fatty acids	k__Bacteria;p__Proteobacteria;c__Betaproteobacteria;o__Burkholderiales;f__Comamonadaceae;g__Ottowia;s__Ottowia thiooxydans	0.486216638	0.013724667	0.360842295	0.96
Long-chain fatty acids	k__Bacteria;p__Proteobacteria;c__Betaproteobacteria;o__Neisseriales;f__Neisseriaceae;g__Neisseria;s__Neisseria mucosa	0.486216638	0.013724667	0.360842295	0.96
unclassified	k__Bacteria;p__Proteobacteria;c__Betaproteobacteria;o__Burkholderiales;f__Comamonadaceae;g__Ottowia;s__Ottowia thiooxydans	0.486216638	0.013724667	0.360842295	0.96
unclassified	k__Bacteria;p__Proteobacteria;c__Betaproteobacteria;o__Neisseriales;f__Neisseriaceae;g__Neisseria;s__Neisseria mucosa	0.486216638	0.013724667	0.360842295	0.96
unclassified	k__Bacteria;p__Proteobacteria;c__Betaproteobacteria;o__Burkholderiales;f__Comamonadaceae;g__Ottowia;s__Ottowia thiooxydans	0.486216638	0.013724667	0.360842295	0.96
unclassified	k__Bacteria;p__Proteobacteria;c__Betaproteobacteria;o__Neisseriales;f__Neisseriaceae;g__Neisseria;s__Neisseria mucosa	0.486216638	0.013724667	0.360842295	0.96
#N/A	k__Bacteria;p__Proteobacteria;c__Betaproteobacteria;o__Burkholderiales;f__Comamonadaceae;g__Ottowia;s__Ottowia thiooxydans	0.486216638	0.013724667	0.360842295	0.96
#N/A	k__Bacteria;p__Proteobacteria;c__Betaproteobacteria;o__Neisseriales;f__Neisseriaceae;g__Neisseria;s__Neisseria mucosa	0.486216638	0.013724667	0.360842295	0.96
Monoalkylglycerophosphocholines	k__Bacteria;p__Proteobacteria;c__Betaproteobacteria;o__Burkholderiales;f__Comamonadaceae;g__Ottowia;s__Ottowia thiooxydans	0.486216638	0.013724667	0.360842295	0.96
Monoalkylglycerophosphocholines	k__Bacteria;p__Proteobacteria;c__Betaproteobacteria;o__Neisseriales;f__Neisseriaceae;g__Neisseria;s__Neisseria mucosa	0.486216638	0.013724667	0.360842295	0.96
unclassified	k__Bacteria;p__Proteobacteria;c__Betaproteobacteria;o__Burkholderiales;f__Comamonadaceae;g__Ottowia;s__Ottowia thiooxydans	0.486216638	0.013724667	0.360842295	0.96
unclassified	k__Bacteria;p__Proteobacteria;c__Betaproteobacteria;o__Neisseriales;f__Neisseriaceae;g__Neisseria;s__Neisseria mucosa	0.486216638	0.013724667	0.360842295	0.96
unclassified	k__Bacteria;p__Proteobacteria;c__Betaproteobacteria;o__Burkholderiales;f__Comamonadaceae;g__Ottowia;s__Ottowia thiooxydans	0.486216638	0.013724667	0.360842295	0.96
unclassified	k__Bacteria;p__Proteobacteria;c__Betaproteobacteria;o__Neisseriales;f__Neisseriaceae;g__Neisseria;s__Neisseria mucosa	0.486216638	0.013724667	0.360842295	0.96
Coumarins and derivatives	k__Bacteria;p__Proteobacteria;c__Betaproteobacteria;o__Burkholderiales;f__Comamonadaceae;g__Ottowia;s__Ottowia thiooxydans	0.486216638	0.013724667	0.360842295	0.96
Coumarins and derivatives	k__Bacteria;p__Proteobacteria;c__Betaproteobacteria;o__Neisseriales;f__Neisseriaceae;g__Neisseria;s__Neisseria mucosa	0.486216638	0.013724667	0.360842295	0.96
#N/A	k__Bacteria;p__Proteobacteria;c__Betaproteobacteria;o__Burkholderiales;f__Comamonadaceae;g__Ottowia;s__Ottowia thiooxydans	0.486216638	0.013724667	0.360842295	0.96
#N/A	k__Bacteria;p__Proteobacteria;c__Betaproteobacteria;o__Neisseriales;f__Neisseriaceae;g__Neisseria;s__Neisseria mucosa	0.486216638	0.013724667	0.360842295	0.96
#N/A	k__Bacteria;p__Proteobacteria;c__Alphaproteobacteria;o__Rhizobiales;f__Phyllobacteriaceae;g__Mesorhizobium;s__Mesorhizobium plurifarium	0.486025177	0.013767402	0.360842295	0.8
#N/A	k__Bacteria;p__Proteobacteria;c__Alphaproteobacteria;o__Rhodobacterales;f__Rhodobacteraceae;g__Thalassobacter;s__Thalassobacter stenotrophicus	0.486025177	0.013767402	0.360842295	0.8
#N/A	k__Bacteria;p__Proteobacteria;c__Alphaproteobacteria;o__Rhizobiales;f__Phyllobacteriaceae;g__Mesorhizobium;s__Mesorhizobium plurifarium	0.486025177	0.013767402	0.360842295	0.8
#N/A	k__Bacteria;p__Proteobacteria;c__Alphaproteobacteria;o__Rhodobacterales;f__Rhodobacteraceae;g__Thalassobacter;s__Thalassobacter stenotrophicus	0.486025177	0.013767402	0.360842295	0.8
unclassified	k__Bacteria;p__Proteobacteria;c__Alphaproteobacteria;o__Rhizobiales;f__Phyllobacteriaceae;g__Mesorhizobium;s__Mesorhizobium plurifarium	0.486025177	0.013767402	0.360842295	0.8
unclassified	k__Bacteria;p__Proteobacteria;c__Alphaproteobacteria;o__Rhodobacterales;f__Rhodobacteraceae;g__Thalassobacter;s__Thalassobacter stenotrophicus	0.486025177	0.013767402	0.360842295	0.8
unclassified	k__Bacteria;p__Proteobacteria;c__Alphaproteobacteria;o__Rhizobiales;f__Phyllobacteriaceae;g__Mesorhizobium;s__Mesorhizobium plurifarium	0.486025177	0.013767402	0.360842295	0.8
unclassified	k__Bacteria;p__Proteobacteria;c__Alphaproteobacteria;o__Rhodobacterales;f__Rhodobacteraceae;g__Thalassobacter;s__Thalassobacter stenotrophicus	0.486025177	0.013767402	0.360842295	0.8
unclassified	k__Bacteria;p__Proteobacteria;c__Alphaproteobacteria;o__Rhizobiales;f__Phyllobacteriaceae;g__Mesorhizobium;s__Mesorhizobium plurifarium	0.486025177	0.013767402	0.360842295	0.8
unclassified	k__Bacteria;p__Proteobacteria;c__Alphaproteobacteria;o__Rhodobacterales;f__Rhodobacteraceae;g__Thalassobacter;s__Thalassobacter stenotrophicus	0.486025177	0.013767402	0.360842295	0.8
unclassified	k__Bacteria;p__Proteobacteria;c__Alphaproteobacteria;o__Rhizobiales;f__Phyllobacteriaceae;g__Mesorhizobium;s__Mesorhizobium plurifarium	0.486025177	0.013767402	0.360842295	0.8
unclassified	k__Bacteria;p__Proteobacteria;c__Alphaproteobacteria;o__Rhodobacterales;f__Rhodobacteraceae;g__Thalassobacter;s__Thalassobacter stenotrophicus	0.486025177	0.013767402	0.360842295	0.8
Bile acids, alcohols and derivatives	k__Bacteria;p__Proteobacteria;c__Alphaproteobacteria;o__Rhizobiales;f__Phyllobacteriaceae;g__Mesorhizobium;s__Mesorhizobium plurifarium	0.486025177	0.013767402	0.360842295	0.8
Bile acids, alcohols and derivatives	k__Bacteria;p__Proteobacteria;c__Alphaproteobacteria;o__Rhodobacterales;f__Rhodobacteraceae;g__Thalassobacter;s__Thalassobacter stenotrophicus	0.486025177	0.013767402	0.360842295	0.8
Dihydroxy bile acids, alcohols and derivatives	k__Bacteria;p__Proteobacteria;c__Deltaproteobacteria;o__Desulfovibrionales;f__Desulfovibrionaceae;g__Lawsonia;s__Lawsonia intracellularis	0.485834674	0.01381003	0.361773612	0.68
unclassified	k__Bacteria;p__Proteobacteria;c__Gammaproteobacteria;o__Pasteurellales;f__Pasteurellaceae;g__Mannheimia;s__Mannheimia haemolytica	0.485362132	0.01391624	0.364004464	0.92
unclassified	k__Bacteria;p__Proteobacteria;c__Gammaproteobacteria;o__Pasteurellales;f__Pasteurellaceae;g__Mannheimia;s__Mannheimia haemolytica	0.485362132	0.01391624	0.364004464	0.92
#N/A	k__Bacteria;p__Proteobacteria;c__Gammaproteobacteria;o__Pasteurellales;f__Pasteurellaceae;g__Mannheimia;s__Mannheimia haemolytica	0.485362132	0.01391624	0.364004464	0.92
unclassified	k__Bacteria;p__Proteobacteria;c__Gammaproteobacteria;o__Pasteurellales;f__Pasteurellaceae;g__Mannheimia;s__Mannheimia haemolytica	0.485362132	0.01391624	0.364004464	0.92
Dihydroxy bile acids, alcohols and derivatives	k__Bacteria;p__Proteobacteria;c__Deltaproteobacteria;o__Desulfovibrionales;f__Desulfovibrionaceae;g__Lawsonia;s__Lawsonia intracellularis	0.485137485	0.013966968	0.364942903	0.68
#N/A	k__Bacteria;p__Proteobacteria;c__Betaproteobacteria;o__Neisseriales;f__Neisseriaceae;g__Neisseria;s__Neisseria elongata;t__Neisseria elongata subsp. glycolytica	0.484012263	0.014223349	0.369842522	0.36
unclassified	k__Bacteria;p__Proteobacteria;c__Deltaproteobacteria;o__Desulfovibrionales;f__Desulfovibrionaceae;g__Lawsonia;s__Lawsonia intracellularis	0.483913905	0.014245943	0.370314623	0.88
unclassified	k__Bacteria;p__Proteobacteria;c__Gammaproteobacteria;o__Chromatiales;f__Chromatiaceae;g__Rheinheimera;s__Rheinheimera perlucida	0.48379874	0.014272435	0.370866081	0.68
unclassified	k__Bacteria;p__Proteobacteria;c__Betaproteobacteria;o__Neisseriales;f__Neisseriaceae;g__Neisseria;s__Neisseria mucosa	0.48365502	0.014305552	0.371539907	0.8
unclassified	k__Bacteria;p__Proteobacteria;c__Deltaproteobacteria;o__Desulfovibrionales;f__Desulfovibrionaceae;g__Lawsonia;s__Lawsonia intracellularis	0.483649773	0.014306762	0.371539907	0.92
Hypoxanthines	k__Bacteria;p__Proteobacteria;c__Deltaproteobacteria;o__Desulfovibrionales;f__Desulfovibrionaceae;g__Lawsonia;s__Lawsonia intracellularis	0.483649773	0.014306762	0.371539907	0.92
#N/A	k__Bacteria;p__Proteobacteria;c__Deltaproteobacteria;o__Desulfovibrionales;f__Desulfovibrionaceae;g__Lawsonia;s__Lawsonia intracellularis	0.483649773	0.014306762	0.371539907	0.92
unclassified	k__Bacteria;p__Proteobacteria;c__Deltaproteobacteria;o__Desulfovibrionales;f__Desulfovibrionaceae;g__Lawsonia;s__Lawsonia intracellularis	0.483649773	0.014306762	0.371539907	0.92
#N/A	k__Bacteria;p__Proteobacteria;c__Deltaproteobacteria;o__Desulfovibrionales;f__Desulfovibrionaceae;g__Lawsonia;s__Lawsonia intracellularis	0.483649773	0.014306762	0.371539907	0.92
unclassified	k__Bacteria;p__Proteobacteria;c__Deltaproteobacteria;o__Desulfovibrionales;f__Desulfovibrionaceae;g__Lawsonia;s__Lawsonia intracellularis	0.483649773	0.014306762	0.371539907	0.92
unclassified	k__Bacteria;p__Proteobacteria;c__Betaproteobacteria;o__Neisseriales;f__Neisseriaceae;g__Neisseria;s__Neisseria lactamica	0.483245706	0.014400216	0.373047396	0.84
unclassified	k__Bacteria;p__Proteobacteria;c__Betaproteobacteria;o__Neisseriales;f__Neisseriaceae;g__Kingella;s__Kingella denitrificans	0.483245706	0.014400216	0.373047396	0.84
unclassified	k__Bacteria;p__Proteobacteria;c__Betaproteobacteria;o__Neisseriales;f__Neisseriaceae;g__Neisseria;s__Neisseria lactamica	0.482782711	0.014507915	0.375380348	0.24
unclassified	k__Bacteria;p__Proteobacteria;c__Betaproteobacteria;o__Neisseriales;f__Neisseriaceae;g__Kingella;s__Kingella denitrificans	0.482782711	0.014507915	0.375380348	0.24
#N/A	k__Bacteria;p__Proteobacteria;c__Gammaproteobacteria;o__Pasteurellales;f__Pasteurellaceae;g__Mannheimia;s__Mannheimia haemolytica	0.482645045	0.014540066	0.376062698	0.88
#N/A	k__Bacteria;p__Proteobacteria;c__Gammaproteobacteria;o__Thiotrichales;f__Francisellaceae;g__Francisella;s__Francisella tularensis;t__Francisella tularensis subsp. holarctica	0.481931597	0.014707624	0.379548173	0.36
#N/A	k__Bacteria;p__Proteobacteria;c__Gammaproteobacteria;o__Thiotrichales;f__Francisellaceae;g__Francisella;s__Francisella sp. W12-1067	0.481931597	0.014707624	0.379548173	0.36
unclassified	k__Bacteria;p__Proteobacteria;c__Deltaproteobacteria;o__Desulfovibrionales;f__Desulfovibrionaceae;g__Lawsonia;s__Lawsonia intracellularis	0.48143615	0.014824914	0.381689952	0.16
unclassified	k__Bacteria;p__Proteobacteria;c__Betaproteobacteria;o__Neisseriales;f__Neisseriaceae;g__Neisseria;s__Neisseria lactamica	0.481112171	0.014902026	0.382997914	0.84
unclassified	k__Bacteria;p__Proteobacteria;c__Betaproteobacteria;o__Neisseriales;f__Neisseriaceae;g__Kingella;s__Kingella denitrificans	0.481112171	0.014902026	0.382997914	0.84
Dipeptides	k__Bacteria;p__Proteobacteria;c__Gammaproteobacteria;o__Enterobacterales;f__Yersiniaceae;g__Yersinia;s__Yersinia pestis	0.481076489	0.014910539	0.383083217	0.92
unclassified	k__Bacteria;p__Proteobacteria;c__Gammaproteobacteria;o__Enterobacterales;f__Yersiniaceae;g__Yersinia;s__Yersinia pestis	0.481076489	0.014910539	0.383083217	0.92
#N/A	k__Bacteria;p__Proteobacteria;c__Gammaproteobacteria;o__Enterobacterales;f__Yersiniaceae;g__Yersinia;s__Yersinia pestis	0.480368189	0.015080352	0.386844188	0.72
unclassified	k__Bacteria;p__Proteobacteria;c__Gammaproteobacteria;o__Chromatiales;f__Chromatiaceae;g__Rheinheimera;s__Rheinheimera perlucida	0.480335199	0.0150883	0.38695269	0.84
unclassified	k__Bacteria;p__Proteobacteria;c__Betaproteobacteria;o__Burkholderiales;f__Comamonadaceae;g__Ottowia;s__Ottowia thiooxydans	0.479198495	0.015364259	0.3907786	0.88
unclassified	k__Bacteria;p__Proteobacteria;c__Betaproteobacteria;o__Neisseriales;f__Neisseriaceae;g__Neisseria;s__Neisseria mucosa	0.479198495	0.015364259	0.3907786	0.88
unclassified	k__Bacteria;p__Proteobacteria;c__Betaproteobacteria;o__Neisseriales;f__Neisseriaceae;g__Neisseria;s__Neisseria lactamica	0.478978636	0.015418109	0.3907786	0.84
unclassified	k__Bacteria;p__Proteobacteria;c__Betaproteobacteria;o__Neisseriales;f__Neisseriaceae;g__Kingella;s__Kingella denitrificans	0.478978636	0.015418109	0.3907786	0.84
#N/A	k__Bacteria;p__Proteobacteria;c__Betaproteobacteria;o__Neisseriales;f__Neisseriaceae;g__Neisseria;s__Neisseria lactamica	0.478978636	0.015418109	0.3907786	0.84
#N/A	k__Bacteria;p__Proteobacteria;c__Betaproteobacteria;o__Neisseriales;f__Neisseriaceae;g__Neisseria;s__Neisseria elongata;t__Neisseria elongata subsp. glycolytica	0.478978636	0.015418109	0.3907786	0.84
#N/A	k__Bacteria;p__Proteobacteria;c__Betaproteobacteria;o__Neisseriales;f__Neisseriaceae;g__Kingella;s__Kingella denitrificans	0.478978636	0.015418109	0.3907786	0.84
unclassified	k__Bacteria;p__Proteobacteria;c__Betaproteobacteria;o__Neisseriales;f__Neisseriaceae;g__Neisseria;s__Neisseria lactamica	0.478978636	0.015418109	0.3907786	0.84
unclassified	k__Bacteria;p__Proteobacteria;c__Betaproteobacteria;o__Neisseriales;f__Neisseriaceae;g__Kingella;s__Kingella denitrificans	0.478978636	0.015418109	0.3907786	0.84
Dihydroxy bile acids, alcohols and derivatives	k__Bacteria;p__Proteobacteria;c__Betaproteobacteria;o__Neisseriales;f__Neisseriaceae;g__Neisseria;s__Neisseria lactamica	0.478978636	0.015418109	0.3907786	0.84
Dihydroxy bile acids, alcohols and derivatives	k__Bacteria;p__Proteobacteria;c__Betaproteobacteria;o__Neisseriales;f__Neisseriaceae;g__Kingella;s__Kingella denitrificans	0.478978636	0.015418109	0.3907786	0.84
#N/A	k__Bacteria;p__Proteobacteria;c__Betaproteobacteria;o__Neisseriales;f__Neisseriaceae;g__Neisseria;s__Neisseria lactamica	0.478978636	0.015418109	0.3907786	0.84
#N/A	k__Bacteria;p__Proteobacteria;c__Betaproteobacteria;o__Neisseriales;f__Neisseriaceae;g__Kingella;s__Kingella denitrificans	0.478978636	0.015418109	0.3907786	0.84
unclassified	k__Bacteria;p__Proteobacteria;c__Deltaproteobacteria;o__Desulfovibrionales;f__Desulfovibrionaceae;g__Lawsonia;s__Lawsonia intracellularis	0.478973673	0.015419327	0.390796405	0.16
#N/A	k__Bacteria;p__Proteobacteria;c__Deltaproteobacteria;o__Desulfovibrionales;f__Desulfovibrionaceae;g__Lawsonia;s__Lawsonia intracellularis	0.478714571	0.015482992	0.391992016	0.92
unclassified	k__Bacteria;p__Proteobacteria;c__Deltaproteobacteria;o__Desulfovibrionales;f__Desulfovibrionaceae;g__Lawsonia;s__Lawsonia intracellularis	0.478714571	0.015482992	0.391992016	0.92
Hypoxanthines	k__Bacteria;p__Proteobacteria;c__Deltaproteobacteria;o__Desulfovibrionales;f__Desulfovibrionaceae;g__Lawsonia;s__Lawsonia intracellularis	0.478714571	0.015482992	0.391992016	0.92
unclassified	k__Bacteria;p__Proteobacteria;c__Deltaproteobacteria;o__Desulfovibrionales;f__Desulfovibrionaceae;g__Lawsonia;s__Lawsonia intracellularis	0.478714571	0.015482992	0.391992016	0.92
unclassified	k__Bacteria;p__Proteobacteria;c__Deltaproteobacteria;o__Desulfovibrionales;f__Desulfovibrionaceae;g__Lawsonia;s__Lawsonia intracellularis	0.478714571	0.015482992	0.391992016	0.92
unclassified	k__Bacteria;p__Proteobacteria;c__Deltaproteobacteria;o__Desulfovibrionales;f__Desulfovibrionaceae;g__Lawsonia;s__Lawsonia intracellularis	0.478714571	0.015482992	0.391992016	0.92
Medium-chain fatty acids	k__Bacteria;p__Proteobacteria;c__Deltaproteobacteria;o__Desulfovibrionales;f__Desulfovibrionaceae;g__Lawsonia;s__Lawsonia intracellularis	0.478604509	0.015510101	0.392597492	0.8
unclassified	k__Bacteria;p__Proteobacteria;c__Betaproteobacteria;o__Burkholderiales;f__Alcaligenaceae;g__Oligella;s__Oligella ureolytica	0.478321883	0.015579892	0.393958455	0.88
#N/A	k__Bacteria;p__Proteobacteria;c__Gammaproteobacteria;o__Chromatiales;f__Chromatiaceae;g__Rheinheimera;s__Rheinheimera perlucida	0.478246202	0.015598624	0.394387058	0.64
unclassified	k__Bacteria;p__Proteobacteria;c__Betaproteobacteria;o__Neisseriales;f__Neisseriaceae;g__Neisseria;s__Neisseria mucosa	0.477859973	0.015694509	0.396394651	0.68
#N/A	k__Bacteria;p__Proteobacteria;c__Deltaproteobacteria;o__Desulfovibrionales;f__Desulfovibrionaceae;g__Lawsonia;s__Lawsonia intracellularis	0.477741533	0.01572401	0.397021914	0.88
Acetamides	k__Bacteria;p__Proteobacteria;c__Gammaproteobacteria;o__Enterobacterales;f__Yersiniaceae;g__Yersinia;s__Yersinia pestis	0.477724229	0.015728323	0.397103646	0.56
#N/A	k__Bacteria;p__Proteobacteria;c__Deltaproteobacteria;o__Desulfovibrionales;f__Desulfovibrionaceae;g__Lawsonia;s__Lawsonia intracellularis	0.477607468	0.015757457	0.397703059	0.88
unclassified	k__Bacteria;p__Proteobacteria;c__Gammaproteobacteria;o__Pasteurellales;f__Pasteurellaceae;g__Mannheimia;s__Mannheimia haemolytica	0.477260957	0.015844177	0.39919193	0.88
#N/A	k__Bacteria;p__Proteobacteria;c__Betaproteobacteria;o__Neisseriales;f__Neisseriaceae;g__Neisseria;s__Neisseria lactamica	0.476845101	0.015948767	0.400375943	0.84
#N/A	k__Bacteria;p__Proteobacteria;c__Betaproteobacteria;o__Neisseriales;f__Neisseriaceae;g__Neisseria;s__Neisseria elongata;t__Neisseria elongata subsp. glycolytica	0.476845101	0.015948767	0.400375943	0.84
#N/A	k__Bacteria;p__Proteobacteria;c__Betaproteobacteria;o__Neisseriales;f__Neisseriaceae;g__Kingella;s__Kingella denitrificans	0.476845101	0.015948767	0.400375943	0.84
#N/A	k__Bacteria;p__Proteobacteria;c__Betaproteobacteria;o__Rhodocyclales;f__Rhodocyclaceae;g__;s__Rhodocyclaceae bacterium Paddy-1	0.476731295	0.015977489	0.40091502	0.64
unclassified	k__Bacteria;p__Proteobacteria;c__Betaproteobacteria;o__Burkholderiales;f__Alcaligenaceae;g__Oligella;s__Oligella ureolytica	0.476001546	0.016162666	0.40488202	0.84
unclassified	k__Bacteria;p__Proteobacteria;c__Gammaproteobacteria;o__Pasteurellales;f__Pasteurellaceae;g__Haemophilus;s__Haemophilus sputorum	0.475960617	0.016173103	0.404997625	0.84
Harmala alkaloids	k__Bacteria;p__Proteobacteria;c__Betaproteobacteria;o__Neisseriales;f__Neisseriaceae;g__Neisseria;s__Neisseria lactamica	0.475778334	0.016219657	0.405455866	0.84
Harmala alkaloids	k__Bacteria;p__Proteobacteria;c__Betaproteobacteria;o__Neisseriales;f__Neisseriaceae;g__Kingella;s__Kingella denitrificans	0.475778334	0.016219657	0.405455866	0.84
Trihydroxy bile acids, alcohols and derivatives	k__Bacteria;p__Proteobacteria;c__Betaproteobacteria;o__Burkholderiales;f__Alcaligenaceae;g__Oligella;s__Oligella ureolytica	0.4751973	0.016368779	0.407838188	0.64
unclassified	k__Bacteria;p__Proteobacteria;c__Gammaproteobacteria;o__Pasteurellales;f__Pasteurellaceae;g__Mannheimia;s__Mannheimia haemolytica	0.475031227	0.016411608	0.408371867	0.68
Tryptamines and derivatives	k__Bacteria;p__Proteobacteria;c__Gammaproteobacteria;o__Enterobacterales;f__Yersiniaceae;g__Yersinia;s__Yersinia pestis	0.474846715	0.016459299	0.409162859	0.72
unclassified	k__Bacteria;p__Proteobacteria;c__Betaproteobacteria;o__Rhodocyclales;f__Rhodocyclaceae;g__;s__Rhodocyclaceae bacterium Paddy-1	0.473961915	0.016689576	0.413241593	0.68
unclassified	k__Bacteria;p__Proteobacteria;c__Gammaproteobacteria;o__Enterobacterales;f__Yersiniaceae;g__Yersinia;s__Yersinia pestis	0.473850018	0.016718885	0.413830559	0.92
Carnitines	k__Bacteria;p__Proteobacteria;c__Betaproteobacteria;o__Neisseriales;f__Neisseriaceae;g__Neisseria;s__Neisseria elongata;t__Neisseria elongata subsp. glycolytica	0.473636209	0.016775005	0.414774217	0.48
#N/A	k__Bacteria;p__Proteobacteria;c__Betaproteobacteria;o__Neisseriales;f__Neisseriaceae;g__Neisseria;s__Neisseria mucosa	0.473348666	0.016850721	0.41612555	0.88
unclassified	k__Bacteria;p__Proteobacteria;c__Deltaproteobacteria;o__Desulfovibrionales;f__Desulfovibrionaceae;g__Lawsonia;s__Lawsonia intracellularis	0.473215128	0.01688598	0.416430357	0.88
#N/A	k__Bacteria;p__Proteobacteria;c__Deltaproteobacteria;o__Desulfovibrionales;f__Desulfovibrionaceae;g__Lawsonia;s__Lawsonia intracellularis	0.473215128	0.01688598	0.416430357	0.88
unclassified	k__Bacteria;p__Proteobacteria;c__Deltaproteobacteria;o__Desulfovibrionales;f__Desulfovibrionaceae;g__Lawsonia;s__Lawsonia intracellularis	0.473082333	0.016921102	0.416867944	0.88
#N/A	k__Bacteria;p__Proteobacteria;c__Deltaproteobacteria;o__Desulfovibrionales;f__Desulfovibrionaceae;g__Lawsonia;s__Lawsonia intracellularis	0.473082333	0.016921102	0.416867944	0.88
Bile acids, alcohols and derivatives	k__Bacteria;p__Proteobacteria;c__Deltaproteobacteria;o__Desulfovibrionales;f__Desulfovibrionaceae;g__Lawsonia;s__Lawsonia intracellularis	0.473073329	0.016923485	0.416898811	0.84
unclassified	k__Bacteria;p__Proteobacteria;c__Deltaproteobacteria;o__Desulfovibrionales;f__Desulfovibrionaceae;g__Lawsonia;s__Lawsonia intracellularis	0.472670957	0.017030284	0.419035196	0.88
unclassified	k__Bacteria;p__Proteobacteria;c__Gammaproteobacteria;o__Pasteurellales;f__Pasteurellaceae;g__Mannheimia;s__Mannheimia haemolytica	0.472646024	0.017036919	0.41909594	0.88
Tyrosine and derivatives	k__Bacteria;p__Proteobacteria;c__Deltaproteobacteria;o__Desulfovibrionales;f__Desulfovibrionaceae;g__Lawsonia;s__Lawsonia intracellularis	0.472567623	0.017057799	0.419553603	0.08
unclassified	k__Bacteria;p__Proteobacteria;c__Deltaproteobacteria;o__Desulfovibrionales;f__Desulfovibrionaceae;g__Lawsonia;s__Lawsonia intracellularis	0.472235297	0.017146538	0.421259796	0.64
Bile acids, alcohols and derivatives	k__Bacteria;p__Proteobacteria;c__Deltaproteobacteria;o__Desulfovibrionales;f__Desulfovibrionaceae;g__Lawsonia;s__Lawsonia intracellularis	0.472212973	0.017152512	0.421377287	0.84
Lineolic acids and derivatives	k__Bacteria;p__Proteobacteria;c__Deltaproteobacteria;o__Myxococcales;f__Polyangiaceae;g__Chondromyces;s__Chondromyces apiculatus	0.47164998	0.017303749	0.424254189	0.64
unclassified	k__Bacteria;p__Proteobacteria;c__Gammaproteobacteria;o__Pasteurellales;f__Pasteurellaceae;g__Haemophilus;s__Haemophilus sputorum	0.470769266	0.01754252	0.427813974	0.92
unclassified	k__Bacteria;p__Proteobacteria;c__Deltaproteobacteria;o__Myxococcales;f__Polyangiaceae;g__Chondromyces;s__Chondromyces apiculatus	0.470464242	0.01762584	0.428852035	0.72
unclassified	k__Bacteria;p__Proteobacteria;c__Betaproteobacteria;o__Neisseriales;f__Neisseriaceae;g__Neisseria;s__Neisseria mucosa	0.470351522	0.017656712	0.429453356	0.48
unclassified	k__Bacteria;p__Proteobacteria;c__Betaproteobacteria;o__Burkholderiales;f__Comamonadaceae;g__Delftia;s__Delftia acidovorans	0.470332943	0.017661805	0.429520567	0.8
#N/A	k__Bacteria;p__Proteobacteria;c__Betaproteobacteria;o__Neisseriales;f__Neisseriaceae;g__Neisseria;s__Neisseria mucosa	0.469884563	0.017785076	0.432015103	0.68
#N/A	k__Bacteria;p__Proteobacteria;c__Betaproteobacteria;o__Neisseriales;f__Neisseriaceae;g__Neisseria;s__Neisseria mucosa	0.469594011	0.017865331	0.433465214	0.64
#N/A	k__Bacteria;p__Proteobacteria;c__Gammaproteobacteria;o__Thiotrichales;f__Francisellaceae;g__Francisella;s__Francisella tularensis;t__Francisella tularensis subsp. holarctica	0.469567776	0.017872592	0.433465214	0.68
#N/A	k__Bacteria;p__Proteobacteria;c__Gammaproteobacteria;o__Thiotrichales;f__Francisellaceae;g__Francisella;s__Francisella sp. W12-1067	0.469567776	0.017872592	0.433465214	0.68
Acetamides	k__Bacteria;p__Proteobacteria;c__Betaproteobacteria;o__Neisseriales;f__Neisseriaceae;g__Neisseria;s__Neisseria lactamica	0.469527915	0.017883629	0.433638751	0.68
Acetamides	k__Bacteria;p__Proteobacteria;c__Betaproteobacteria;o__Neisseriales;f__Neisseriaceae;g__Kingella;s__Kingella denitrificans	0.469527915	0.017883629	0.433638751	0.68
unclassified	k__Bacteria;p__Proteobacteria;c__Betaproteobacteria;o__Neisseriales;f__Neisseriaceae;g__Neisseria;s__Neisseria elongata;t__Neisseria elongata subsp. glycolytica	0.469527778	0.017883667	0.433638751	0.16
unclassified	k__Bacteria;p__Proteobacteria;c__Betaproteobacteria;o__Neisseriales;f__Neisseriaceae;g__Neisseria;s__Neisseria elongata;t__Neisseria elongata subsp. glycolytica	0.469238705	0.017963874	0.43520205	0.64
unclassified	k__Bacteria;p__Proteobacteria;c__Betaproteobacteria;o__Neisseriales;f__Neisseriaceae;g__Neisseria;s__Neisseria mucosa	0.469082352	0.018007378	0.436120432	0.8
Dipeptides	k__Bacteria;p__Proteobacteria;c__Deltaproteobacteria;o__Desulfovibrionales;f__Desulfovibrionaceae;g__Lawsonia;s__Lawsonia intracellularis	0.468814916	0.01808199	0.43739312	0.48
#N/A	k__Bacteria;p__Proteobacteria;c__Deltaproteobacteria;o__Myxococcales;f__Polyangiaceae;g__Chondromyces;s__Chondromyces apiculatus	0.468400803	0.018198021	0.439459987	0.72
unclassified	k__Bacteria;p__Proteobacteria;c__Betaproteobacteria;o__Burkholderiales;f__Alcaligenaceae;g__Oligella;s__Oligella ureolytica	0.468080036	0.018288315	0.441303318	0.2
Bilirubins	k__Bacteria;p__Proteobacteria;c__Gammaproteobacteria;o__Chromatiales;f__Chromatiaceae;g__Rheinheimera;s__Rheinheimera perlucida	0.46752626	0.018445058	0.444010631	0.84
N-acyl amines	k__Bacteria;p__Proteobacteria;c__Betaproteobacteria;o__Burkholderiales;f__Comamonadaceae;g__Ottowia;s__Ottowia thiooxydans	0.46725061	0.018523488	0.445607714	0.76
unclassified	k__Bacteria;p__Proteobacteria;c__Deltaproteobacteria;o__Desulfovibrionales;f__Desulfovibrionaceae;g__Lawsonia;s__Lawsonia intracellularis	0.467230482	0.018529225	0.445697279	0.64
#N/A	k__Bacteria;p__Proteobacteria;c__Deltaproteobacteria;o__Desulfovibrionales;f__Desulfovibrionaceae;g__Lawsonia;s__Lawsonia intracellularis	0.46577301	0.018948552	0.452136614	0.8
Tyrosine and derivatives	k__Bacteria;p__Proteobacteria;c__Deltaproteobacteria;o__Desulfovibrionales;f__Desulfovibrionaceae;g__Lawsonia;s__Lawsonia intracellularis	0.465728293	0.018961539	0.452426982	0.08
#N/A	k__Bacteria;p__Proteobacteria;c__Deltaproteobacteria;o__Desulfovibrionales;f__Desulfovibrionaceae;g__Lawsonia;s__Lawsonia intracellularis	0.465642304	0.018986533	0.452710749	0.8
Alpha amino acids and derivatives	k__Bacteria;p__Proteobacteria;c__Betaproteobacteria;o__Burkholderiales;f__Alcaligenaceae;g__Oligella;s__Oligella ureolytica	0.465465348	0.019038051	0.45364597	0.8
#N/A	k__Bacteria;p__Proteobacteria;c__Gammaproteobacteria;o__Pasteurellales;f__Pasteurellaceae;g__Mannheimia;s__Mannheimia haemolytica	0.465061815	0.01915596	0.455807613	0.92
unclassified	k__Bacteria;p__Proteobacteria;c__Betaproteobacteria;o__Neisseriales;f__Neisseriaceae;g__Neisseria;s__Neisseria mucosa	0.464567623	0.019301169	0.45739955	0.68
#N/A	k__Bacteria;p__Proteobacteria;c__Deltaproteobacteria;o__Myxococcales;f__Polyangiaceae;g__Chondromyces;s__Chondromyces apiculatus	0.464538731	0.019309686	0.45739955	0.76
Anisoles	k__Bacteria;p__Proteobacteria;c__Betaproteobacteria;o__Burkholderiales;f__Alcaligenaceae;g__Oligella;s__Oligella ureolytica	0.464007198	0.019466923	0.460443876	0.92
Dipeptides	k__Bacteria;p__Proteobacteria;c__Deltaproteobacteria;o__Desulfovibrionales;f__Desulfovibrionaceae;g__Lawsonia;s__Lawsonia intracellularis	0.463281718	0.019683214	0.464242991	0.48
unclassified	k__Bacteria;p__Proteobacteria;c__Betaproteobacteria;o__Burkholderiales;f__Comamonadaceae;g__Delftia;s__Delftia acidovorans	0.462978946	0.019774058	0.465816244	0.76
Acylaminosugars	k__Bacteria;p__Proteobacteria;c__Gammaproteobacteria;o__Thiotrichales;f__Francisellaceae;g__Francisella;s__Francisella tularensis;t__Francisella tularensis subsp. holarctica	0.462357798	0.019961496	0.468724649	0.76
Acylaminosugars	k__Bacteria;p__Proteobacteria;c__Gammaproteobacteria;o__Thiotrichales;f__Francisellaceae;g__Francisella;s__Francisella sp. W12-1067	0.462357798	0.019961496	0.468724649	0.76
unclassified	k__Bacteria;p__Proteobacteria;c__Gammaproteobacteria;o__Thiotrichales;f__Francisellaceae;g__Francisella;s__Francisella tularensis;t__Francisella tularensis subsp. holarctica	0.462357798	0.019961496	0.468724649	0.76
unclassified	k__Bacteria;p__Proteobacteria;c__Gammaproteobacteria;o__Thiotrichales;f__Francisellaceae;g__Francisella;s__Francisella sp. W12-1067	0.462357798	0.019961496	0.468724649	0.76
#N/A	k__Bacteria;p__Proteobacteria;c__Betaproteobacteria;o__Burkholderiales;f__Alcaligenaceae;g__Oligella;s__Oligella ureolytica	0.462144971	0.02002605	0.469801739	0.88
Dihydroxy bile acids, alcohols and derivatives	k__Bacteria;p__Proteobacteria;c__Gammaproteobacteria;o__Pasteurellales;f__Pasteurellaceae;g__Mannheimia;s__Mannheimia haemolytica	0.460896735	0.020408092	0.476598597	0.08
#N/A	k__Bacteria;p__Proteobacteria;c__Gammaproteobacteria;o__Pasteurellales;f__Pasteurellaceae;g__Haemophilus;s__Haemophilus sputorum	0.459763648	0.020760003	0.482507816	0.68
unclassified	k__Bacteria;p__Proteobacteria;c__Gammaproteobacteria;o__Pasteurellales;f__Pasteurellaceae;g__Mannheimia;s__Mannheimia haemolytica	0.459570382	0.020820516	0.483660256	0.88
Bile acids, alcohols and derivatives	k__Bacteria;p__Proteobacteria;c__Betaproteobacteria;o__Neisseriales;f__Neisseriaceae;g__Neisseria;s__Neisseria lactamica	0.459026422	0.020991604	0.486653663	0.76
Bile acids, alcohols and derivatives	k__Bacteria;p__Proteobacteria;c__Betaproteobacteria;o__Neisseriales;f__Neisseriaceae;g__Neisseria;s__Neisseria elongata;t__Neisseria elongata subsp. glycolytica	0.459026422	0.020991604	0.486653663	0.76
Bile acids, alcohols and derivatives	k__Bacteria;p__Proteobacteria;c__Betaproteobacteria;o__Neisseriales;f__Neisseriaceae;g__Kingella;s__Kingella denitrificans	0.459026422	0.020991604	0.486653663	0.76
unclassified	k__Bacteria;p__Proteobacteria;c__Betaproteobacteria;o__Neisseriales;f__Neisseriaceae;g__Neisseria;s__Neisseria elongata;t__Neisseria elongata subsp. glycolytica	0.458479713	0.021164706	0.48969189	0.44
#N/A	k__Bacteria;p__Proteobacteria;c__Deltaproteobacteria;o__Desulfovibrionales;f__Desulfovibrionaceae;g__Lawsonia;s__Lawsonia intracellularis	0.458115282	0.021280737	0.491654194	0.92
#N/A	k__Bacteria;p__Proteobacteria;c__Deltaproteobacteria;o__Desulfovibrionales;f__Desulfovibrionaceae;g__Lawsonia;s__Lawsonia intracellularis	0.457986724	0.021321792	0.492286565	0.92
#N/A	k__Bacteria;p__Proteobacteria;c__Betaproteobacteria;o__Burkholderiales;f__Alcaligenaceae;g__Oligella;s__Oligella ureolytica	0.457733086	0.021402979	0.492350912	0.88
unclassified	k__Bacteria;p__Proteobacteria;c__Deltaproteobacteria;o__Desulfovibrionales;f__Desulfovibrionaceae;g__Lawsonia;s__Lawsonia intracellularis	0.456534003	0.021790198	0.492350912	0.68
unclassified	k__Bacteria;p__Proteobacteria;c__Deltaproteobacteria;o__Desulfovibrionales;f__Desulfovibrionaceae;g__Lawsonia;s__Lawsonia intracellularis	0.456464199	0.021812913	0.492350912	0.8
unclassified	k__Bacteria;p__Proteobacteria;c__Betaproteobacteria;o__Burkholderiales;f__Comamonadaceae;g__Delftia;s__Delftia acidovorans	0.456300018	0.021866417	0.492350912	0.92
unclassified	k__Bacteria;p__Proteobacteria;c__Betaproteobacteria;o__Burkholderiales;f__Comamonadaceae;g__Delftia;s__Delftia acidovorans	0.456300018	0.021866417	0.492350912	0.92
unclassified	k__Bacteria;p__Proteobacteria;c__Deltaproteobacteria;o__Desulfovibrionales;f__Desulfovibrionaceae;g__Lawsonia;s__Lawsonia intracellularis	0.456101143	0.021931369	0.492350912	0.68
Oligopeptides	k__Bacteria;p__Proteobacteria;c__Betaproteobacteria;o__Neisseriales;f__Neisseriaceae;g__Neisseria;s__Neisseria elongata;t__Neisseria elongata subsp. glycolytica	0.45550975	0.022125443	0.492350912	0.84
Pyridinecarboxylic acids	k__Bacteria;p__Proteobacteria;c__Betaproteobacteria;o__Neisseriales;f__Neisseriaceae;g__Neisseria;s__Neisseria lactamica	0.45550975	0.022125443	0.492350912	0.84
Pyridinecarboxylic acids	k__Bacteria;p__Proteobacteria;c__Betaproteobacteria;o__Neisseriales;f__Neisseriaceae;g__Kingella;s__Kingella denitrificans	0.45550975	0.022125443	0.492350912	0.84
unclassified	k__Bacteria;p__Proteobacteria;c__Betaproteobacteria;o__Burkholderiales;f__Comamonadaceae;g__Delftia;s__Delftia acidovorans	0.455201573	0.022227126	0.492350912	0.68
Monohydroxy bile acids, alcohols and derivatives	k__Bacteria;p__Proteobacteria;c__Gammaproteobacteria;o__Thiotrichales;f__Francisellaceae;g__Francisella;s__Francisella tularensis;t__Francisella tularensis subsp. holarctica	0.454861111	0.022339901	0.492350912	0.92
Monohydroxy bile acids, alcohols and derivatives	k__Bacteria;p__Proteobacteria;c__Deltaproteobacteria;o__Myxococcales;f__Polyangiaceae;g__Chondromyces;s__Chondromyces apiculatus	0.454861111	0.022339901	0.492350912	0.92
Monohydroxy bile acids, alcohols and derivatives	k__Bacteria;p__Proteobacteria;c__Gammaproteobacteria;o__Thiotrichales;f__Francisellaceae;g__Francisella;s__Francisella sp. W12-1067	0.454861111	0.022339901	0.492350912	0.92
unclassified	k__Bacteria;p__Proteobacteria;c__Deltaproteobacteria;o__Myxococcales;f__Polyangiaceae;g__Chondromyces;s__Chondromyces apiculatus	0.454861111	0.022339901	0.492350912	0.92
Lineolic acids and derivatives	k__Bacteria;p__Proteobacteria;c__Gammaproteobacteria;o__Thiotrichales;f__Francisellaceae;g__Francisella;s__Francisella tularensis;t__Francisella tularensis subsp. holarctica	0.454861111	0.022339901	0.492350912	0.92
Lineolic acids and derivatives	k__Bacteria;p__Proteobacteria;c__Deltaproteobacteria;o__Myxococcales;f__Polyangiaceae;g__Chondromyces;s__Chondromyces apiculatus	0.454861111	0.022339901	0.492350912	0.92
Lineolic acids and derivatives	k__Bacteria;p__Proteobacteria;c__Gammaproteobacteria;o__Thiotrichales;f__Francisellaceae;g__Francisella;s__Francisella sp. W12-1067	0.454861111	0.022339901	0.492350912	0.92
Dipeptides	k__Bacteria;p__Proteobacteria;c__Deltaproteobacteria;o__Myxococcales;f__Polyangiaceae;g__Chondromyces;s__Chondromyces apiculatus	0.454861111	0.022339901	0.492350912	0.92
#N/A	k__Bacteria;p__Proteobacteria;c__Deltaproteobacteria;o__Myxococcales;f__Polyangiaceae;g__Chondromyces;s__Chondromyces apiculatus	0.454861111	0.022339901	0.492350912	0.92
#N/A	k__Bacteria;p__Proteobacteria;c__Gammaproteobacteria;o__Thiotrichales;f__Francisellaceae;g__Francisella;s__Francisella tularensis;t__Francisella tularensis subsp. holarctica	0.454861111	0.022339901	0.492350912	0.92
#N/A	k__Bacteria;p__Proteobacteria;c__Deltaproteobacteria;o__Myxococcales;f__Polyangiaceae;g__Chondromyces;s__Chondromyces apiculatus	0.454861111	0.022339901	0.492350912	0.92
#N/A	k__Bacteria;p__Proteobacteria;c__Gammaproteobacteria;o__Thiotrichales;f__Francisellaceae;g__Francisella;s__Francisella sp. W12-1067	0.454861111	0.022339901	0.492350912	0.92
#N/A	k__Bacteria;p__Proteobacteria;c__Deltaproteobacteria;o__Myxococcales;f__Polyangiaceae;g__Chondromyces;s__Chondromyces apiculatus	0.454861111	0.022339901	0.492350912	0.92
#N/A	k__Bacteria;p__Proteobacteria;c__Deltaproteobacteria;o__Myxococcales;f__Polyangiaceae;g__Chondromyces;s__Chondromyces apiculatus	0.454861111	0.022339901	0.492350912	0.92
#N/A	k__Bacteria;p__Proteobacteria;c__Gammaproteobacteria;o__Thiotrichales;f__Francisellaceae;g__Francisella;s__Francisella tularensis;t__Francisella tularensis subsp. holarctica	0.454861111	0.022339901	0.492350912	0.92
#N/A	k__Bacteria;p__Proteobacteria;c__Gammaproteobacteria;o__Thiotrichales;f__Francisellaceae;g__Francisella;s__Francisella sp. W12-1067	0.454861111	0.022339901	0.492350912	0.92
#N/A	k__Bacteria;p__Proteobacteria;c__Gammaproteobacteria;o__Thiotrichales;f__Francisellaceae;g__Francisella;s__Francisella tularensis;t__Francisella tularensis subsp. holarctica	0.454861111	0.022339901	0.492350912	0.92
#N/A	k__Bacteria;p__Proteobacteria;c__Gammaproteobacteria;o__Thiotrichales;f__Francisellaceae;g__Francisella;s__Francisella sp. W12-1067	0.454861111	0.022339901	0.492350912	0.92
Stilbenes	k__Bacteria;p__Proteobacteria;c__Gammaproteobacteria;o__Thiotrichales;f__Francisellaceae;g__Francisella;s__Francisella tularensis;t__Francisella tularensis subsp. holarctica	0.454861111	0.022339901	0.492350912	0.92
Stilbenes	k__Bacteria;p__Proteobacteria;c__Deltaproteobacteria;o__Myxococcales;f__Polyangiaceae;g__Chondromyces;s__Chondromyces apiculatus	0.454861111	0.022339901	0.492350912	0.92
Stilbenes	k__Bacteria;p__Proteobacteria;c__Gammaproteobacteria;o__Thiotrichales;f__Francisellaceae;g__Francisella;s__Francisella sp. W12-1067	0.454861111	0.022339901	0.492350912	0.92
unclassified	k__Bacteria;p__Proteobacteria;c__Gammaproteobacteria;o__Thiotrichales;f__Francisellaceae;g__Francisella;s__Francisella tularensis;t__Francisella tularensis subsp. holarctica	0.454861111	0.022339901	0.492350912	0.92
unclassified	k__Bacteria;p__Proteobacteria;c__Deltaproteobacteria;o__Myxococcales;f__Polyangiaceae;g__Chondromyces;s__Chondromyces apiculatus	0.454861111	0.022339901	0.492350912	0.92
unclassified	k__Bacteria;p__Proteobacteria;c__Gammaproteobacteria;o__Thiotrichales;f__Francisellaceae;g__Francisella;s__Francisella sp. W12-1067	0.454861111	0.022339901	0.492350912	0.92
#N/A	k__Bacteria;p__Proteobacteria;c__Deltaproteobacteria;o__Myxococcales;f__Polyangiaceae;g__Chondromyces;s__Chondromyces apiculatus	0.454861111	0.022339901	0.492350912	0.92
unclassified	k__Bacteria;p__Proteobacteria;c__Deltaproteobacteria;o__Myxococcales;f__Polyangiaceae;g__Chondromyces;s__Chondromyces apiculatus	0.454861111	0.022339901	0.492350912	0.92
unclassified	k__Bacteria;p__Proteobacteria;c__Gammaproteobacteria;o__Thiotrichales;f__Francisellaceae;g__Francisella;s__Francisella tularensis;t__Francisella tularensis subsp. holarctica	0.454861111	0.022339901	0.492350912	0.92
unclassified	k__Bacteria;p__Proteobacteria;c__Deltaproteobacteria;o__Myxococcales;f__Polyangiaceae;g__Chondromyces;s__Chondromyces apiculatus	0.454861111	0.022339901	0.492350912	0.92
unclassified	k__Bacteria;p__Proteobacteria;c__Gammaproteobacteria;o__Thiotrichales;f__Francisellaceae;g__Francisella;s__Francisella sp. W12-1067	0.454861111	0.022339901	0.492350912	0.92
unclassified	k__Bacteria;p__Proteobacteria;c__Deltaproteobacteria;o__Myxococcales;f__Polyangiaceae;g__Chondromyces;s__Chondromyces apiculatus	0.454861111	0.022339901	0.492350912	0.92
unclassified	k__Bacteria;p__Proteobacteria;c__Gammaproteobacteria;o__Thiotrichales;f__Francisellaceae;g__Francisella;s__Francisella tularensis;t__Francisella tularensis subsp. holarctica	0.454861111	0.022339901	0.492350912	0.92
unclassified	k__Bacteria;p__Proteobacteria;c__Deltaproteobacteria;o__Myxococcales;f__Polyangiaceae;g__Chondromyces;s__Chondromyces apiculatus	0.454861111	0.022339901	0.492350912	0.92
unclassified	k__Bacteria;p__Proteobacteria;c__Gammaproteobacteria;o__Thiotrichales;f__Francisellaceae;g__Francisella;s__Francisella sp. W12-1067	0.454861111	0.022339901	0.492350912	0.92
Steroid acids	k__Bacteria;p__Proteobacteria;c__Gammaproteobacteria;o__Pasteurellales;f__Pasteurellaceae;g__Mannheimia;s__Mannheimia haemolytica	0.454523181	0.022452296	0.492350912	0.6
unclassified	k__Bacteria;p__Proteobacteria;c__Betaproteobacteria;o__Burkholderiales;f__Alcaligenaceae;g__Oligella;s__Oligella ureolytica	0.454474782	0.022468431	0.492350912	0.8
Bilirubins	k__Bacteria;p__Proteobacteria;c__Betaproteobacteria;o__Rhodocyclales;f__Rhodocyclaceae;g__;s__Rhodocyclaceae bacterium Paddy-1	0.45447398	0.022468698	0.492350912	0.84
Glycinated bile acids and derivatives	k__Bacteria;p__Proteobacteria;c__Alphaproteobacteria;o__Rhizobiales;f__Phyllobacteriaceae;g__Mesorhizobium;s__Mesorhizobium plurifarium	0.453298414	0.022863498	0.492350912	0.76
Glycinated bile acids and derivatives	k__Bacteria;p__Proteobacteria;c__Alphaproteobacteria;o__Rhodobacterales;f__Rhodobacteraceae;g__Thalassobacter;s__Thalassobacter stenotrophicus	0.453298414	0.022863498	0.492350912	0.76
unclassified	k__Bacteria;p__Proteobacteria;c__Betaproteobacteria;o__Neisseriales;f__Neisseriaceae;g__Neisseria;s__Neisseria elongata;t__Neisseria elongata subsp. glycolytica	0.453272237	0.022872353	0.492436156	0.4
Fatty acid esters	k__Bacteria;p__Proteobacteria;c__Deltaproteobacteria;o__Desulfovibrionales;f__Desulfovibrionaceae;g__Lawsonia;s__Lawsonia intracellularis	0.452790872	0.023035678	0.494565505	0.56
unclassified	k__Bacteria;p__Proteobacteria;c__Betaproteobacteria;o__Neisseriales;f__Neisseriaceae;g__Neisseria;s__Neisseria lactamica	0.452695933	0.023068001	0.494565505	0.8
unclassified	k__Bacteria;p__Proteobacteria;c__Betaproteobacteria;o__Neisseriales;f__Neisseriaceae;g__Kingella;s__Kingella denitrificans	0.452695933	0.023068001	0.494565505	0.8
Medium-chain fatty acids	k__Bacteria;p__Proteobacteria;c__Betaproteobacteria;o__Neisseriales;f__Neisseriaceae;g__Neisseria;s__Neisseria elongata;t__Neisseria elongata subsp. glycolytica	0.452695933	0.023068001	0.494565505	0.8
unclassified	k__Bacteria;p__Proteobacteria;c__Gammaproteobacteria;o__Pasteurellales;f__Pasteurellaceae;g__Haemophilus;s__Haemophilus sputorum	0.452303629	0.023201957	0.496085935	0.16
1-hydroxy-2-unsubstituted benzenoids	k__Bacteria;p__Proteobacteria;c__Betaproteobacteria;o__Rhodocyclales;f__Rhodocyclaceae;g__;s__Rhodocyclaceae bacterium Paddy-1	0.451838156	0.023361713	0.498952073	0.8
Bile acids, alcohols and derivatives	k__Bacteria;p__Proteobacteria;c__Betaproteobacteria;o__Rhodocyclales;f__Rhodocyclaceae;g__;s__Rhodocyclaceae bacterium Paddy-1	0.451838156	0.023361713	0.498952073	0.8
Fatty acid esters	k__Bacteria;p__Proteobacteria;c__Deltaproteobacteria;o__Desulfovibrionales;f__Desulfovibrionaceae;g__Lawsonia;s__Lawsonia intracellularis	0.451640839	0.023429703	0.500058611	0.56
unclassified	k__Bacteria;p__Proteobacteria;c__Betaproteobacteria;o__Neisseriales;f__Neisseriaceae;g__Neisseria;s__Neisseria elongata;t__Neisseria elongata subsp. glycolytica	0.45124268	0.023567385	0.50196869	0.84
Harmala alkaloids	k__Bacteria;p__Proteobacteria;c__Betaproteobacteria;o__Neisseriales;f__Neisseriaceae;g__Neisseria;s__Neisseria elongata;t__Neisseria elongata subsp. glycolytica	0.45124268	0.023567385	0.50196869	0.84
unclassified	k__Bacteria;p__Proteobacteria;c__Betaproteobacteria;o__Burkholderiales;f__Comamonadaceae;g__Ottowia;s__Ottowia thiooxydans	0.451120843	0.023609646	0.50270429	0.4
unclassified	k__Bacteria;p__Proteobacteria;c__Deltaproteobacteria;o__Desulfovibrionales;f__Desulfovibrionaceae;g__Lawsonia;s__Lawsonia intracellularis	0.451077442	0.023624715	0.502830584	0.92
Pyrazines	k__Bacteria;p__Proteobacteria;c__Deltaproteobacteria;o__Desulfovibrionales;f__Desulfovibrionaceae;g__Lawsonia;s__Lawsonia intracellularis	0.451077442	0.023624715	0.502830584	0.92
unclassified	k__Bacteria;p__Proteobacteria;c__Betaproteobacteria;o__Burkholderiales;f__Comamonadaceae;g__Ottowia;s__Ottowia thiooxydans	0.450924322	0.023677942	0.503132049	0.88
unclassified	k__Bacteria;p__Proteobacteria;c__Betaproteobacteria;o__Burkholderiales;f__Comamonadaceae;g__Ottowia;s__Ottowia thiooxydans	0.450924322	0.023677942	0.503132049	0.88
unclassified	k__Bacteria;p__Proteobacteria;c__Gammaproteobacteria;o__Pasteurellales;f__Pasteurellaceae;g__Mannheimia;s__Mannheimia haemolytica	0.450600651	0.023790774	0.504444472	0.6
#N/A	k__Bacteria;p__Proteobacteria;c__Betaproteobacteria;o__Burkholderiales;f__Comamonadaceae;g__Delftia;s__Delftia acidovorans	0.4501059	0.023964085	0.507448182	0.92
unclassified	k__Bacteria;p__Proteobacteria;c__Deltaproteobacteria;o__Desulfovibrionales;f__Desulfovibrionaceae;g__Lawsonia;s__Lawsonia intracellularis	0.449356456	0.024228557	0.511101526	0.8
unclassified	k__Bacteria;p__Proteobacteria;c__Gammaproteobacteria;o__Enterobacterales;f__Yersiniaceae;g__Yersinia;s__Yersinia pestis	0.449251189	0.024265893	0.511101526	0.2
#N/A	k__Bacteria;p__Proteobacteria;c__Deltaproteobacteria;o__Desulfovibrionales;f__Desulfovibrionaceae;g__Lawsonia;s__Lawsonia intracellularis	0.449229425	0.024273618	0.511101526	0.92
Trihydroxy bile acids, alcohols and derivatives	k__Bacteria;p__Proteobacteria;c__Deltaproteobacteria;o__Myxococcales;f__Polyangiaceae;g__Chondromyces;s__Chondromyces apiculatus	0.448828207	0.024416385	0.511101526	0.64
#N/A	k__Bacteria;p__Proteobacteria;c__Gammaproteobacteria;o__Thiotrichales;f__Francisellaceae;g__Francisella;s__Francisella tularensis;t__Francisella tularensis subsp. holarctica	0.448828207	0.024416385	0.511101526	0.64
#N/A	k__Bacteria;p__Proteobacteria;c__Gammaproteobacteria;o__Thiotrichales;f__Francisellaceae;g__Francisella;s__Francisella sp. W12-1067	0.448828207	0.024416385	0.511101526	0.64
#N/A	k__Bacteria;p__Proteobacteria;c__Betaproteobacteria;o__Burkholderiales;f__Alcaligenaceae;g__Oligella;s__Oligella ureolytica	0.448806157	0.024424251	0.511101526	0.76
#N/A	k__Bacteria;p__Proteobacteria;c__Betaproteobacteria;o__Neisseriales;f__Neisseriaceae;g__Neisseria;s__Neisseria lactamica	0.448797582	0.02442731	0.511101526	0.8
#N/A	k__Bacteria;p__Proteobacteria;c__Betaproteobacteria;o__Neisseriales;f__Neisseriaceae;g__Kingella;s__Kingella denitrificans	0.448797582	0.02442731	0.511101526	0.8
unclassified	k__Bacteria;p__Proteobacteria;c__Betaproteobacteria;o__Neisseriales;f__Neisseriaceae;g__Neisseria;s__Neisseria elongata;t__Neisseria elongata subsp. glycolytica	0.448797582	0.02442731	0.511101526	0.8
unclassified	k__Bacteria;p__Proteobacteria;c__Betaproteobacteria;o__Neisseriales;f__Neisseriaceae;g__Neisseria;s__Neisseria elongata;t__Neisseria elongata subsp. glycolytica	0.448797582	0.02442731	0.511101526	0.8
unclassified	k__Bacteria;p__Proteobacteria;c__Gammaproteobacteria;o__Enterobacterales;f__Yersiniaceae;g__Yersinia;s__Yersinia pestis	0.448617216	0.024491734	0.511101526	0.48
#N/A	k__Bacteria;p__Proteobacteria;c__Betaproteobacteria;o__Neisseriales;f__Neisseriaceae;g__Neisseria;s__Neisseria lactamica	0.448443638	0.024553863	0.511101526	0.36
#N/A	k__Bacteria;p__Proteobacteria;c__Betaproteobacteria;o__Neisseriales;f__Neisseriaceae;g__Kingella;s__Kingella denitrificans	0.448443638	0.024553863	0.511101526	0.36
Bile acids, alcohols and derivatives	k__Bacteria;p__Proteobacteria;c__Gammaproteobacteria;o__Pasteurellales;f__Pasteurellaceae;g__Haemophilus;s__Haemophilus sputorum	0.448246455	0.024624596	0.511101526	0.84
unclassified	k__Bacteria;p__Proteobacteria;c__Betaproteobacteria;o__Neisseriales;f__Neisseriaceae;g__Neisseria;s__Neisseria mucosa	0.448208657	0.024638173	0.511101526	0.52
unclassified	k__Bacteria;p__Proteobacteria;c__Gammaproteobacteria;o__Pasteurellales;f__Pasteurellaceae;g__Haemophilus;s__Haemophilus sputorum	0.447884649	0.02475481	0.511101526	0.92
unclassified	k__Bacteria;p__Proteobacteria;c__Deltaproteobacteria;o__Myxococcales;f__Polyangiaceae;g__Chondromyces;s__Chondromyces apiculatus	0.447865064	0.024761874	0.511101526	0.68
Trihydroxy bile acids, alcohols and derivatives	k__Bacteria;p__Proteobacteria;c__Gammaproteobacteria;o__Pasteurellales;f__Pasteurellaceae;g__Mannheimia;s__Mannheimia haemolytica	0.447801476	0.024784822	0.511101526	0.56
#N/A	k__Bacteria;p__Proteobacteria;c__Betaproteobacteria;o__Burkholderiales;f__Alcaligenaceae;g__Oligella;s__Oligella ureolytica	0.447438687	0.024916075	0.511101526	0.88
unclassified	k__Bacteria;p__Proteobacteria;c__Deltaproteobacteria;o__Desulfovibrionales;f__Desulfovibrionaceae;g__Lawsonia;s__Lawsonia intracellularis	0.447155388	0.025018959	0.511101526	0.8
#N/A	k__Bacteria;p__Proteobacteria;c__Betaproteobacteria;o__Neisseriales;f__Neisseriaceae;g__Neisseria;s__Neisseria mucosa	0.447024436	0.025066633	0.511101526	0.88
#N/A	k__Bacteria;p__Proteobacteria;c__Betaproteobacteria;o__Burkholderiales;f__Comamonadaceae;g__Delftia;s__Delftia acidovorans	0.447008841	0.025072315	0.511101526	0.92
Lineolic acids and derivatives	k__Bacteria;p__Proteobacteria;c__Deltaproteobacteria;o__Myxococcales;f__Polyangiaceae;g__Chondromyces;s__Chondromyces apiculatus	0.446227968	0.025358168	0.511101526	0.56
#N/A	k__Bacteria;p__Proteobacteria;c__Gammaproteobacteria;o__Enterobacterales;f__Yersiniaceae;g__Yersinia;s__Yersinia pestis	0.445947919	0.025461323	0.511101526	0.84
unclassified	k__Bacteria;p__Proteobacteria;c__Betaproteobacteria;o__Neisseriales;f__Neisseriaceae;g__Neisseria;s__Neisseria mucosa	0.445698585	0.025553449	0.511101526	0.96
#N/A	k__Bacteria;p__Proteobacteria;c__Betaproteobacteria;o__Neisseriales;f__Neisseriaceae;g__Neisseria;s__Neisseria mucosa	0.445698585	0.025553449	0.511101526	0.96
unclassified	k__Bacteria;p__Proteobacteria;c__Betaproteobacteria;o__Neisseriales;f__Neisseriaceae;g__Neisseria;s__Neisseria mucosa	0.445698585	0.025553449	0.511101526	0.96
Phenylacetamides	k__Bacteria;p__Proteobacteria;c__Betaproteobacteria;o__Neisseriales;f__Neisseriaceae;g__Neisseria;s__Neisseria mucosa	0.445698585	0.025553449	0.511101526	0.96
N-alkylpyrrolidines	k__Bacteria;p__Proteobacteria;c__Betaproteobacteria;o__Neisseriales;f__Neisseriaceae;g__Neisseria;s__Neisseria mucosa	0.445698585	0.025553449	0.511101526	0.96
unclassified	k__Bacteria;p__Proteobacteria;c__Betaproteobacteria;o__Neisseriales;f__Neisseriaceae;g__Neisseria;s__Neisseria mucosa	0.445698585	0.025553449	0.511101526	0.96
Oligopeptides	k__Bacteria;p__Proteobacteria;c__Betaproteobacteria;o__Neisseriales;f__Neisseriaceae;g__Neisseria;s__Neisseria mucosa	0.445698585	0.025553449	0.511101526	0.96
unclassified	k__Bacteria;p__Proteobacteria;c__Betaproteobacteria;o__Neisseriales;f__Neisseriaceae;g__Neisseria;s__Neisseria mucosa	0.445698585	0.025553449	0.511101526	0.96
unclassified	k__Bacteria;p__Proteobacteria;c__Betaproteobacteria;o__Neisseriales;f__Neisseriaceae;g__Neisseria;s__Neisseria mucosa	0.445698585	0.025553449	0.511101526	0.96
unclassified	k__Bacteria;p__Proteobacteria;c__Betaproteobacteria;o__Neisseriales;f__Neisseriaceae;g__Neisseria;s__Neisseria mucosa	0.445698585	0.025553449	0.511101526	0.96
unclassified	k__Bacteria;p__Proteobacteria;c__Betaproteobacteria;o__Neisseriales;f__Neisseriaceae;g__Neisseria;s__Neisseria mucosa	0.445698585	0.025553449	0.511101526	0.96
#N/A	k__Bacteria;p__Proteobacteria;c__Betaproteobacteria;o__Neisseriales;f__Neisseriaceae;g__Neisseria;s__Neisseria mucosa	0.445698585	0.025553449	0.511101526	0.96
#N/A	k__Bacteria;p__Proteobacteria;c__Betaproteobacteria;o__Neisseriales;f__Neisseriaceae;g__Neisseria;s__Neisseria mucosa	0.445698585	0.025553449	0.511101526	0.96
unclassified	k__Bacteria;p__Proteobacteria;c__Alphaproteobacteria;o__Rhizobiales;f__Phyllobacteriaceae;g__Mesorhizobium;s__Mesorhizobium plurifarium	0.445523079	0.025618458	0.511101526	0.8
unclassified	k__Bacteria;p__Proteobacteria;c__Alphaproteobacteria;o__Rhodobacterales;f__Rhodobacteraceae;g__Thalassobacter;s__Thalassobacter stenotrophicus	0.445523079	0.025618458	0.511101526	0.8
#N/A	k__Bacteria;p__Proteobacteria;c__Alphaproteobacteria;o__Rhizobiales;f__Phyllobacteriaceae;g__Mesorhizobium;s__Mesorhizobium plurifarium	0.445523079	0.025618458	0.511101526	0.8
#N/A	k__Bacteria;p__Proteobacteria;c__Alphaproteobacteria;o__Rhodobacterales;f__Rhodobacteraceae;g__Thalassobacter;s__Thalassobacter stenotrophicus	0.445523079	0.025618458	0.511101526	0.8
unclassified	k__Bacteria;p__Proteobacteria;c__Alphaproteobacteria;o__Rhizobiales;f__Phyllobacteriaceae;g__Mesorhizobium;s__Mesorhizobium plurifarium	0.445523079	0.025618458	0.511101526	0.8
unclassified	k__Bacteria;p__Proteobacteria;c__Alphaproteobacteria;o__Rhodobacterales;f__Rhodobacteraceae;g__Thalassobacter;s__Thalassobacter stenotrophicus	0.445523079	0.025618458	0.511101526	0.8
#N/A	k__Bacteria;p__Proteobacteria;c__Alphaproteobacteria;o__Rhizobiales;f__Phyllobacteriaceae;g__Mesorhizobium;s__Mesorhizobium plurifarium	0.445523079	0.025618458	0.511101526	0.8
#N/A	k__Bacteria;p__Proteobacteria;c__Alphaproteobacteria;o__Rhodobacterales;f__Rhodobacteraceae;g__Thalassobacter;s__Thalassobacter stenotrophicus	0.445523079	0.025618458	0.511101526	0.8
#N/A	k__Bacteria;p__Proteobacteria;c__Alphaproteobacteria;o__Rhizobiales;f__Phyllobacteriaceae;g__Mesorhizobium;s__Mesorhizobium plurifarium	0.445523079	0.025618458	0.511101526	0.8
#N/A	k__Bacteria;p__Proteobacteria;c__Alphaproteobacteria;o__Rhodobacterales;f__Rhodobacteraceae;g__Thalassobacter;s__Thalassobacter stenotrophicus	0.445523079	0.025618458	0.511101526	0.8
#N/A	k__Bacteria;p__Proteobacteria;c__Betaproteobacteria;o__Burkholderiales;f__Comamonadaceae;g__Ottowia;s__Ottowia thiooxydans	0.445074493	0.025785224	0.511101526	0.88
#N/A	k__Bacteria;p__Proteobacteria;c__Betaproteobacteria;o__Neisseriales;f__Neisseriaceae;g__Neisseria;s__Neisseria elongata;t__Neisseria elongata subsp. glycolytica	0.444899232	0.025850616	0.511101526	0.8
Bile acids, alcohols and derivatives	k__Bacteria;p__Proteobacteria;c__Gammaproteobacteria;o__Enterobacterales;f__Yersiniaceae;g__Yersinia;s__Yersinia pestis	0.444822909	0.025879135	0.511101526	0.76
3-hydroxysteroids	k__Bacteria;p__Proteobacteria;c__Betaproteobacteria;o__Burkholderiales;f__Comamonadaceae;g__Ottowia;s__Ottowia thiooxydans	0.443968144	0.026200262	0.511101526	0.64
unclassified	k__Bacteria;p__Proteobacteria;c__Deltaproteobacteria;o__Desulfovibrionales;f__Desulfovibrionaceae;g__Lawsonia;s__Lawsonia intracellularis	0.443836539	0.026249989	0.511101526	0.84
Coumarins and derivatives	k__Bacteria;p__Proteobacteria;c__Deltaproteobacteria;o__Desulfovibrionales;f__Desulfovibrionaceae;g__Lawsonia;s__Lawsonia intracellularis	0.443836539	0.026249989	0.511101526	0.84
#N/A	k__Bacteria;p__Proteobacteria;c__Deltaproteobacteria;o__Myxococcales;f__Polyangiaceae;g__Chondromyces;s__Chondromyces apiculatus	0.443639527	0.026324572	0.511101526	0.72
#N/A	k__Bacteria;p__Proteobacteria;c__Gammaproteobacteria;o__Enterobacterales;f__Yersiniaceae;g__Yersinia;s__Yersinia pestis	0.443558366	0.026355347	0.511101526	0.72
#N/A	k__Bacteria;p__Proteobacteria;c__Alphaproteobacteria;o__Rhizobiales;f__Phyllobacteriaceae;g__Mesorhizobium;s__Mesorhizobium plurifarium	0.443329314	0.026442355	0.511101526	0.84
#N/A	k__Bacteria;p__Proteobacteria;c__Alphaproteobacteria;o__Rhodobacterales;f__Rhodobacteraceae;g__Thalassobacter;s__Thalassobacter stenotrophicus	0.443329314	0.026442355	0.511101526	0.84
unclassified	k__Bacteria;p__Proteobacteria;c__Alphaproteobacteria;o__Rhizobiales;f__Phyllobacteriaceae;g__Mesorhizobium;s__Mesorhizobium plurifarium	0.443329314	0.026442355	0.511101526	0.84
unclassified	k__Bacteria;p__Proteobacteria;c__Alphaproteobacteria;o__Rhodobacterales;f__Rhodobacteraceae;g__Thalassobacter;s__Thalassobacter stenotrophicus	0.443329314	0.026442355	0.511101526	0.84
unclassified	k__Bacteria;p__Proteobacteria;c__Alphaproteobacteria;o__Rhizobiales;f__Phyllobacteriaceae;g__Mesorhizobium;s__Mesorhizobium plurifarium	0.443329314	0.026442355	0.511101526	0.84
unclassified	k__Bacteria;p__Proteobacteria;c__Alphaproteobacteria;o__Rhodobacterales;f__Rhodobacteraceae;g__Thalassobacter;s__Thalassobacter stenotrophicus	0.443329314	0.026442355	0.511101526	0.84
unclassified	k__Bacteria;p__Proteobacteria;c__Alphaproteobacteria;o__Rhizobiales;f__Phyllobacteriaceae;g__Mesorhizobium;s__Mesorhizobium plurifarium	0.443329314	0.026442355	0.511101526	0.84
unclassified	k__Bacteria;p__Proteobacteria;c__Alphaproteobacteria;o__Rhodobacterales;f__Rhodobacteraceae;g__Thalassobacter;s__Thalassobacter stenotrophicus	0.443329314	0.026442355	0.511101526	0.84
unclassified	k__Bacteria;p__Proteobacteria;c__Alphaproteobacteria;o__Rhizobiales;f__Phyllobacteriaceae;g__Mesorhizobium;s__Mesorhizobium plurifarium	0.443329314	0.026442355	0.511101526	0.84
unclassified	k__Bacteria;p__Proteobacteria;c__Alphaproteobacteria;o__Rhodobacterales;f__Rhodobacteraceae;g__Thalassobacter;s__Thalassobacter stenotrophicus	0.443329314	0.026442355	0.511101526	0.84
unclassified	k__Bacteria;p__Proteobacteria;c__Alphaproteobacteria;o__Rhizobiales;f__Phyllobacteriaceae;g__Mesorhizobium;s__Mesorhizobium plurifarium	0.443329314	0.026442355	0.511101526	0.84
unclassified	k__Bacteria;p__Proteobacteria;c__Alphaproteobacteria;o__Rhodobacterales;f__Rhodobacteraceae;g__Thalassobacter;s__Thalassobacter stenotrophicus	0.443329314	0.026442355	0.511101526	0.84
N-acyl amines	k__Bacteria;p__Proteobacteria;c__Gammaproteobacteria;o__Enterobacterales;f__Yersiniaceae;g__Yersinia;s__Yersinia pestis	0.442877619	0.026614616	0.513919344	0.76
#N/A	k__Bacteria;p__Proteobacteria;c__Deltaproteobacteria;o__Desulfovibrionales;f__Desulfovibrionaceae;g__Lawsonia;s__Lawsonia intracellularis	0.441836068	0.027015273	0.519687592	0.8
unclassified	k__Bacteria;p__Proteobacteria;c__Gammaproteobacteria;o__Thiotrichales;f__Francisellaceae;g__Francisella;s__Francisella tularensis;t__Francisella tularensis subsp. holarctica	0.441576087	0.027116034	0.520883228	0.72
unclassified	k__Bacteria;p__Proteobacteria;c__Gammaproteobacteria;o__Thiotrichales;f__Francisellaceae;g__Francisella;s__Francisella sp. W12-1067	0.441576087	0.027116034	0.520883228	0.72
#N/A	k__Bacteria;p__Proteobacteria;c__Gammaproteobacteria;o__Thiotrichales;f__Francisellaceae;g__Francisella;s__Francisella tularensis;t__Francisella tularensis subsp. holarctica	0.441576087	0.027116034	0.520883228	0.72
#N/A	k__Bacteria;p__Proteobacteria;c__Gammaproteobacteria;o__Thiotrichales;f__Francisellaceae;g__Francisella;s__Francisella sp. W12-1067	0.441576087	0.027116034	0.520883228	0.72
unclassified	k__Bacteria;p__Proteobacteria;c__Deltaproteobacteria;o__Myxococcales;f__Polyangiaceae;g__Chondromyces;s__Chondromyces apiculatus	0.440962412	0.027355076	0.523856036	0.6
#N/A	k__Bacteria;p__Proteobacteria;c__Gammaproteobacteria;o__Enterobacterales;f__Yersiniaceae;g__Yersinia;s__Yersinia pestis	0.440814723	0.027412857	0.524088458	0.92
unclassified	k__Bacteria;p__Proteobacteria;c__Gammaproteobacteria;o__Enterobacterales;f__Yersiniaceae;g__Yersinia;s__Yersinia pestis	0.440814723	0.027412857	0.524088458	0.92
Xanthines	k__Bacteria;p__Proteobacteria;c__Gammaproteobacteria;o__Enterobacterales;f__Yersiniaceae;g__Yersinia;s__Yersinia pestis	0.440814723	0.027412857	0.524088458	0.92
unclassified	k__Bacteria;p__Proteobacteria;c__Betaproteobacteria;o__Neisseriales;f__Neisseriaceae;g__Neisseria;s__Neisseria mucosa	0.440687121	0.027462859	0.524167117	0.88
Oligopeptides	k__Bacteria;p__Proteobacteria;c__Betaproteobacteria;o__Neisseriales;f__Neisseriaceae;g__Neisseria;s__Neisseria elongata;t__Neisseria elongata subsp. glycolytica	0.440618039	0.027489959	0.524550473	0.6
unclassified	k__Bacteria;p__Proteobacteria;c__Deltaproteobacteria;o__Desulfovibrionales;f__Desulfovibrionaceae;g__Lawsonia;s__Lawsonia intracellularis	0.440322099	0.027606299	0.526281243	0.84
unclassified	k__Bacteria;p__Proteobacteria;c__Deltaproteobacteria;o__Desulfovibrionales;f__Desulfovibrionaceae;g__Lawsonia;s__Lawsonia intracellularis	0.440050257	0.027713514	0.527878455	0.8
unclassified	k__Bacteria;p__Proteobacteria;c__Gammaproteobacteria;o__Pasteurellales;f__Pasteurellaceae;g__Haemophilus;s__Haemophilus sputorum	0.440046	0.027715196	0.5279014	0.72
#N/A	k__Bacteria;p__Proteobacteria;c__Gammaproteobacteria;o__Enterobacterales;f__Yersiniaceae;g__Yersinia;s__Yersinia pestis	0.439810793	0.027808236	0.529154289	0.36
unclassified	k__Bacteria;p__Proteobacteria;c__Betaproteobacteria;o__Burkholderiales;f__Comamonadaceae;g__Ottowia;s__Ottowia thiooxydans	0.439712149	0.027847331	0.529734207	0.88
unclassified	k__Bacteria;p__Proteobacteria;c__Betaproteobacteria;o__Burkholderiales;f__Comamonadaceae;g__Ottowia;s__Ottowia thiooxydans	0.439712149	0.027847331	0.529734207	0.88
unclassified	k__Bacteria;p__Proteobacteria;c__Deltaproteobacteria;o__Desulfovibrionales;f__Desulfovibrionaceae;g__Lawsonia;s__Lawsonia intracellularis	0.439356251	0.02798875	0.531473996	0.92
Pyrazines	k__Bacteria;p__Proteobacteria;c__Deltaproteobacteria;o__Desulfovibrionales;f__Desulfovibrionaceae;g__Lawsonia;s__Lawsonia intracellularis	0.439356251	0.02798875	0.531473996	0.92
unclassified	k__Bacteria;p__Proteobacteria;c__Deltaproteobacteria;o__Desulfovibrionales;f__Desulfovibrionaceae;g__Lawsonia;s__Lawsonia intracellularis	0.439356251	0.02798875	0.531473996	0.92
#N/A	k__Bacteria;p__Proteobacteria;c__Gammaproteobacteria;o__Thiotrichales;f__Francisellaceae;g__Francisella;s__Francisella tularensis;t__Francisella tularensis subsp. holarctica	0.438367535	0.028384655	0.53680813	0.76
#N/A	k__Bacteria;p__Proteobacteria;c__Gammaproteobacteria;o__Thiotrichales;f__Francisellaceae;g__Francisella;s__Francisella sp. W12-1067	0.438367535	0.028384655	0.53680813	0.76
Trialkylamines	k__Bacteria;p__Proteobacteria;c__Gammaproteobacteria;o__Thiotrichales;f__Francisellaceae;g__Francisella;s__Francisella tularensis;t__Francisella tularensis subsp. holarctica	0.438367535	0.028384655	0.53680813	0.76
Trialkylamines	k__Bacteria;p__Proteobacteria;c__Gammaproteobacteria;o__Thiotrichales;f__Francisellaceae;g__Francisella;s__Francisella sp. W12-1067	0.438367535	0.028384655	0.53680813	0.76
Dipeptides	k__Bacteria;p__Proteobacteria;c__Betaproteobacteria;o__Burkholderiales;f__Comamonadaceae;g__Delftia;s__Delftia acidovorans	0.43833861	0.028396305	0.536964196	0.76
Acetamides	k__Bacteria;p__Proteobacteria;c__Gammaproteobacteria;o__Enterobacterales;f__Yersiniaceae;g__Yersinia;s__Yersinia pestis	0.438190174	0.028456148	0.537948697	0.68
#N/A	k__Bacteria;p__Proteobacteria;c__Deltaproteobacteria;o__Myxococcales;f__Polyangiaceae;g__Chondromyces;s__Chondromyces apiculatus	0.438000195	0.028532888	0.538975772	0.68
Dipeptides	k__Bacteria;p__Proteobacteria;c__Betaproteobacteria;o__Burkholderiales;f__Comamonadaceae;g__Delftia;s__Delftia acidovorans	0.437830952	0.028601391	0.540103783	0.4
unclassified	k__Bacteria;p__Proteobacteria;c__Betaproteobacteria;o__Burkholderiales;f__Alcaligenaceae;g__Oligella;s__Oligella ureolytica	0.437511946	0.028730873	0.541966084	0.88
#N/A	k__Bacteria;p__Proteobacteria;c__Deltaproteobacteria;o__Myxococcales;f__Polyangiaceae;g__Chondromyces;s__Chondromyces apiculatus	0.437449208	0.028756393	0.542013123	0.72
unclassified	k__Bacteria;p__Proteobacteria;c__Gammaproteobacteria;o__Thiotrichales;f__Francisellaceae;g__Francisella;s__Francisella tularensis;t__Francisella tularensis subsp. holarctica	0.43727235	0.028828431	0.542899223	0.6
unclassified	k__Bacteria;p__Proteobacteria;c__Gammaproteobacteria;o__Thiotrichales;f__Francisellaceae;g__Francisella;s__Francisella sp. W12-1067	0.43727235	0.028828431	0.542899223	0.6
unclassified	k__Bacteria;p__Proteobacteria;c__Betaproteobacteria;o__Neisseriales;f__Neisseriaceae;g__Neisseria;s__Neisseria mucosa	0.437143692	0.028880928	0.543702742	0.84
Bile acids, alcohols and derivatives	k__Bacteria;p__Proteobacteria;c__Betaproteobacteria;o__Neisseriales;f__Neisseriaceae;g__Neisseria;s__Neisseria mucosa	0.437143692	0.028880928	0.543702742	0.84
unclassified	k__Bacteria;p__Proteobacteria;c__Betaproteobacteria;o__Burkholderiales;f__Comamonadaceae;g__Ottowia;s__Ottowia thiooxydans	0.436787235	0.029026774	0.54548306	0.88
unclassified	k__Bacteria;p__Proteobacteria;c__Gammaproteobacteria;o__Enterobacterales;f__Yersiniaceae;g__Yersinia;s__Yersinia pestis	0.436685311	0.029068586	0.546064733	0.92
unclassified	k__Bacteria;p__Proteobacteria;c__Betaproteobacteria;o__Neisseriales;f__Neisseriaceae;g__Neisseria;s__Neisseria mucosa	0.436310626	0.029222705	0.548046961	0.16
#N/A	k__Bacteria;p__Proteobacteria;c__Deltaproteobacteria;o__Desulfovibrionales;f__Desulfovibrionaceae;g__Lawsonia;s__Lawsonia intracellularis	0.436271836	0.029238698	0.548237584	0.92
Dipeptides	k__Bacteria;p__Proteobacteria;c__Betaproteobacteria;o__Neisseriales;f__Neisseriaceae;g__Neisseria;s__Neisseria mucosa	0.43596006	0.029367496	0.550042315	0.64
unclassified	k__Bacteria;p__Proteobacteria;c__Deltaproteobacteria;o__Desulfovibrionales;f__Desulfovibrionaceae;g__Lawsonia;s__Lawsonia intracellularis	0.435955268	0.029369479	0.550063947	0.84
unclassified	k__Bacteria;p__Proteobacteria;c__Deltaproteobacteria;o__Desulfovibrionales;f__Desulfovibrionaceae;g__Lawsonia;s__Lawsonia intracellularis	0.435851832	0.029412313	0.550726328	0.8
unclassified	k__Bacteria;p__Proteobacteria;c__Deltaproteobacteria;o__Desulfovibrionales;f__Desulfovibrionaceae;g__Lawsonia;s__Lawsonia intracellularis	0.435851832	0.029412313	0.550726328	0.8
Lineolic acids and derivatives	k__Bacteria;p__Proteobacteria;c__Gammaproteobacteria;o__Pasteurellales;f__Pasteurellaceae;g__Mannheimia;s__Mannheimia haemolytica	0.43553408	0.029544209	0.552588088	0.92
#N/A	k__Bacteria;p__Proteobacteria;c__Gammaproteobacteria;o__Pasteurellales;f__Pasteurellaceae;g__Mannheimia;s__Mannheimia haemolytica	0.43553408	0.029544209	0.552588088	0.92
unclassified	k__Bacteria;p__Proteobacteria;c__Betaproteobacteria;o__Burkholderiales;f__Alcaligenaceae;g__Oligella;s__Oligella ureolytica	0.435462584	0.029573952	0.553013336	0.6
#N/A	k__Bacteria;p__Proteobacteria;c__Betaproteobacteria;o__Neisseriales;f__Neisseriaceae;g__Neisseria;s__Neisseria mucosa	0.435419259	0.029591987	0.553013336	0.84
Xanthines	k__Bacteria;p__Proteobacteria;c__Betaproteobacteria;o__Neisseriales;f__Neisseriaceae;g__Neisseria;s__Neisseria elongata;t__Neisseria elongata subsp. glycolytica	0.435393379	0.029602764	0.553013336	0.76
unclassified	k__Bacteria;p__Proteobacteria;c__Deltaproteobacteria;o__Desulfovibrionales;f__Desulfovibrionaceae;g__Lawsonia;s__Lawsonia intracellularis	0.435227463	0.029671932	0.553769287	0.84
Trihydroxy bile acids, alcohols and derivatives	k__Bacteria;p__Proteobacteria;c__Gammaproteobacteria;o__Pasteurellales;f__Pasteurellaceae;g__Haemophilus;s__Haemophilus sputorum	0.434228156	0.030091276	0.558358227	0.64
unclassified	k__Bacteria;p__Proteobacteria;c__Betaproteobacteria;o__Neisseriales;f__Neisseriaceae;g__Neisseria;s__Neisseria mucosa	0.434190425	0.030107202	0.558358227	0.76
#N/A	k__Bacteria;p__Proteobacteria;c__Deltaproteobacteria;o__Desulfovibrionales;f__Desulfovibrionaceae;g__Lawsonia;s__Lawsonia intracellularis	0.434067701	0.030159049	0.559097163	0.8
Coumarins and derivatives	k__Bacteria;p__Proteobacteria;c__Deltaproteobacteria;o__Desulfovibrionales;f__Desulfovibrionaceae;g__Lawsonia;s__Lawsonia intracellularis	0.433771853	0.03028433	0.560733742	0.84
unclassified	k__Bacteria;p__Proteobacteria;c__Deltaproteobacteria;o__Myxococcales;f__Polyangiaceae;g__Chondromyces;s__Chondromyces apiculatus	0.433322328	0.030475484	0.563095082	0.72
unclassified	k__Bacteria;p__Proteobacteria;c__Gammaproteobacteria;o__Pasteurellales;f__Pasteurellaceae;g__Mannheimia;s__Mannheimia haemolytica	0.433085865	0.030576424	0.56449819	0.68
unclassified	k__Bacteria;p__Proteobacteria;c__Betaproteobacteria;o__Burkholderiales;f__Comamonadaceae;g__Delftia;s__Delftia acidovorans	0.433010863	0.030608496	0.564939465	0.84
#N/A	k__Bacteria;p__Proteobacteria;c__Betaproteobacteria;o__Rhodocyclales;f__Rhodocyclaceae;g__;s__Rhodocyclaceae bacterium Paddy-1	0.432747835	0.030721185	0.566248623	0.68
unclassified	k__Bacteria;p__Proteobacteria;c__Betaproteobacteria;o__Neisseriales;f__Neisseriaceae;g__Neisseria;s__Neisseria mucosa	0.432711729	0.03073668	0.56646364	0.48
unclassified	k__Bacteria;p__Proteobacteria;c__Gammaproteobacteria;o__Pasteurellales;f__Pasteurellaceae;g__Mannheimia;s__Mannheimia haemolytica	0.43260902	0.030780791	0.566852286	0.84
unclassified	k__Bacteria;p__Proteobacteria;c__Betaproteobacteria;o__Neisseriales;f__Neisseriaceae;g__Neisseria;s__Neisseria mucosa	0.431912377	0.031081324	0.571065509	0.88
unclassified	k__Bacteria;p__Proteobacteria;c__Gammaproteobacteria;o__Pasteurellales;f__Pasteurellaceae;g__Mannheimia;s__Mannheimia haemolytica	0.431832147	0.031116086	0.571474042	0.72
unclassified	k__Bacteria;p__Proteobacteria;c__Gammaproteobacteria;o__Pasteurellales;f__Pasteurellaceae;g__Haemophilus;s__Haemophilus sputorum	0.431679361	0.031182369	0.572313752	0.28
Hydroquinolones	k__Bacteria;p__Proteobacteria;c__Gammaproteobacteria;o__Pasteurellales;f__Pasteurellaceae;g__Haemophilus;s__Haemophilus sputorum	0.431538493	0.031243583	0.573218536	0.92
unclassified	k__Bacteria;p__Proteobacteria;c__Deltaproteobacteria;o__Desulfovibrionales;f__Desulfovibrionaceae;g__Lawsonia;s__Lawsonia intracellularis	0.430739723	0.031592507	0.57600329	0.84
#N/A	k__Bacteria;p__Proteobacteria;c__Betaproteobacteria;o__Neisseriales;f__Neisseriaceae;g__Neisseria;s__Neisseria mucosa	0.430712365	0.031604513	0.57600329	0.6
Bile acids, alcohols and derivatives	k__Bacteria;p__Proteobacteria;c__Gammaproteobacteria;o__Thiotrichales;f__Francisellaceae;g__Francisella;s__Francisella tularensis;t__Francisella tularensis subsp. holarctica	0.430458032	0.031716298	0.57600329	0.44
Bile acids, alcohols and derivatives	k__Bacteria;p__Proteobacteria;c__Gammaproteobacteria;o__Thiotrichales;f__Francisellaceae;g__Francisella;s__Francisella sp. W12-1067	0.430458032	0.031716298	0.57600329	0.44
#N/A	k__Bacteria;p__Proteobacteria;c__Betaproteobacteria;o__Neisseriales;f__Neisseriaceae;g__Neisseria;s__Neisseria lactamica	0.430280418	0.031794551	0.57600329	0.8
#N/A	k__Bacteria;p__Proteobacteria;c__Betaproteobacteria;o__Neisseriales;f__Neisseriaceae;g__Kingella;s__Kingella denitrificans	0.430280418	0.031794551	0.57600329	0.8
#N/A	k__Bacteria;p__Proteobacteria;c__Deltaproteobacteria;o__Desulfovibrionales;f__Desulfovibrionaceae;g__Lawsonia;s__Lawsonia intracellularis	0.430132827	0.031859693	0.57600329	0.84
#N/A	k__Bacteria;p__Proteobacteria;c__Deltaproteobacteria;o__Desulfovibrionales;f__Desulfovibrionaceae;g__Lawsonia;s__Lawsonia intracellularis	0.430132827	0.031859693	0.57600329	0.84
1-acyl-sn-glycero-3-phosphocholines	k__Bacteria;p__Proteobacteria;c__Betaproteobacteria;o__Neisseriales;f__Neisseriaceae;g__Neisseria;s__Neisseria mucosa	0.429914321	0.031956332	0.57600329	0.72
#N/A	k__Bacteria;p__Proteobacteria;c__Gammaproteobacteria;o__Thiotrichales;f__Francisellaceae;g__Francisella;s__Francisella tularensis;t__Francisella tularensis subsp. holarctica	0.429810062	0.032002524	0.57600329	0.64
#N/A	k__Bacteria;p__Proteobacteria;c__Gammaproteobacteria;o__Thiotrichales;f__Francisellaceae;g__Francisella;s__Francisella sp. W12-1067	0.429810062	0.032002524	0.57600329	0.64
unclassified	k__Bacteria;p__Proteobacteria;c__Gammaproteobacteria;o__Pasteurellales;f__Pasteurellaceae;g__Haemophilus;s__Haemophilus sputorum	0.42975478	0.032027039	0.57600329	0.52
#N/A	k__Bacteria;p__Proteobacteria;c__Gammaproteobacteria;o__Chromatiales;f__Chromatiaceae;g__Rheinheimera;s__Rheinheimera perlucida	0.4294948	0.032142529	0.57600329	0.68
Glycinated bile acids and derivatives	k__Bacteria;p__Proteobacteria;c__Gammaproteobacteria;o__Enterobacterales;f__Yersiniaceae;g__Yersinia;s__Yersinia pestis	0.429141075	0.032300197	0.57600329	0.96
Glycinated bile acids and derivatives	k__Bacteria;p__Proteobacteria;c__Gammaproteobacteria;o__Enterobacterales;f__Yersiniaceae;g__Yersinia;s__Yersinia pestis	0.429141075	0.032300197	0.57600329	0.96
2,2-dimethyl-1-benzopyrans	k__Bacteria;p__Proteobacteria;c__Betaproteobacteria;o__Burkholderiales;f__Comamonadaceae;g__Delftia;s__Delftia acidovorans	0.429141075	0.032300197	0.57600329	0.96
#N/A	k__Bacteria;p__Proteobacteria;c__Betaproteobacteria;o__Burkholderiales;f__Comamonadaceae;g__Delftia;s__Delftia acidovorans	0.429141075	0.032300197	0.57600329	0.96
unclassified	k__Bacteria;p__Proteobacteria;c__Gammaproteobacteria;o__Enterobacterales;f__Yersiniaceae;g__Yersinia;s__Yersinia pestis	0.429141075	0.032300197	0.57600329	0.96
#N/A	k__Bacteria;p__Proteobacteria;c__Betaproteobacteria;o__Burkholderiales;f__Comamonadaceae;g__Delftia;s__Delftia acidovorans	0.429141075	0.032300197	0.57600329	0.96
#N/A	k__Bacteria;p__Proteobacteria;c__Betaproteobacteria;o__Burkholderiales;f__Comamonadaceae;g__Delftia;s__Delftia acidovorans	0.429141075	0.032300197	0.57600329	0.96
Glycinated bile acids and derivatives	k__Bacteria;p__Proteobacteria;c__Gammaproteobacteria;o__Enterobacterales;f__Yersiniaceae;g__Yersinia;s__Yersinia pestis	0.429141075	0.032300197	0.57600329	0.96
Glycinated bile acids and derivatives	k__Bacteria;p__Proteobacteria;c__Gammaproteobacteria;o__Enterobacterales;f__Yersiniaceae;g__Yersinia;s__Yersinia pestis	0.429141075	0.032300197	0.57600329	0.96
#N/A	k__Bacteria;p__Proteobacteria;c__Betaproteobacteria;o__Burkholderiales;f__Comamonadaceae;g__Delftia;s__Delftia acidovorans	0.429141075	0.032300197	0.57600329	0.96
#N/A	k__Bacteria;p__Proteobacteria;c__Betaproteobacteria;o__Burkholderiales;f__Comamonadaceae;g__Delftia;s__Delftia acidovorans	0.429141075	0.032300197	0.57600329	0.96
#N/A	k__Bacteria;p__Proteobacteria;c__Gammaproteobacteria;o__Enterobacterales;f__Yersiniaceae;g__Yersinia;s__Yersinia pestis	0.429141075	0.032300197	0.57600329	0.96
#N/A	k__Bacteria;p__Proteobacteria;c__Gammaproteobacteria;o__Enterobacterales;f__Yersiniaceae;g__Yersinia;s__Yersinia pestis	0.429141075	0.032300197	0.57600329	0.96
#N/A	k__Bacteria;p__Proteobacteria;c__Gammaproteobacteria;o__Enterobacterales;f__Yersiniaceae;g__Yersinia;s__Yersinia pestis	0.429141075	0.032300197	0.57600329	0.96
#N/A	k__Bacteria;p__Proteobacteria;c__Gammaproteobacteria;o__Enterobacterales;f__Yersiniaceae;g__Yersinia;s__Yersinia pestis	0.429141075	0.032300197	0.57600329	0.96
Purine nucleosides	k__Bacteria;p__Proteobacteria;c__Betaproteobacteria;o__Burkholderiales;f__Comamonadaceae;g__Delftia;s__Delftia acidovorans	0.429141075	0.032300197	0.57600329	0.96
unclassified	k__Bacteria;p__Proteobacteria;c__Gammaproteobacteria;o__Enterobacterales;f__Yersiniaceae;g__Yersinia;s__Yersinia pestis	0.429141075	0.032300197	0.57600329	0.96
unclassified	k__Bacteria;p__Proteobacteria;c__Gammaproteobacteria;o__Enterobacterales;f__Yersiniaceae;g__Yersinia;s__Yersinia pestis	0.429141075	0.032300197	0.57600329	0.96
unclassified	k__Bacteria;p__Proteobacteria;c__Betaproteobacteria;o__Neisseriales;f__Neisseriaceae;g__Neisseria;s__Neisseria elongata;t__Neisseria elongata subsp. glycolytica	0.428915766	0.032400947	0.57600329	0.36
Dihydroxy bile acids, alcohols and derivatives	k__Bacteria;p__Proteobacteria;c__Alphaproteobacteria;o__Rhizobiales;f__Phyllobacteriaceae;g__Mesorhizobium;s__Mesorhizobium plurifarium	0.428877879	0.032417913	0.57600329	0.72
Dihydroxy bile acids, alcohols and derivatives	k__Bacteria;p__Proteobacteria;c__Alphaproteobacteria;o__Rhodobacterales;f__Rhodobacteraceae;g__Thalassobacter;s__Thalassobacter stenotrophicus	0.428877879	0.032417913	0.57600329	0.72
unclassified	k__Bacteria;p__Proteobacteria;c__Alphaproteobacteria;o__Rhizobiales;f__Phyllobacteriaceae;g__Mesorhizobium;s__Mesorhizobium plurifarium	0.428877879	0.032417913	0.57600329	0.72
unclassified	k__Bacteria;p__Proteobacteria;c__Alphaproteobacteria;o__Rhodobacterales;f__Rhodobacteraceae;g__Thalassobacter;s__Thalassobacter stenotrophicus	0.428877879	0.032417913	0.57600329	0.72
unclassified	k__Bacteria;p__Proteobacteria;c__Alphaproteobacteria;o__Rhizobiales;f__Phyllobacteriaceae;g__Mesorhizobium;s__Mesorhizobium plurifarium	0.428877879	0.032417913	0.57600329	0.72
unclassified	k__Bacteria;p__Proteobacteria;c__Alphaproteobacteria;o__Rhodobacterales;f__Rhodobacteraceae;g__Thalassobacter;s__Thalassobacter stenotrophicus	0.428877879	0.032417913	0.57600329	0.72
#N/A	k__Bacteria;p__Proteobacteria;c__Alphaproteobacteria;o__Rhizobiales;f__Phyllobacteriaceae;g__Mesorhizobium;s__Mesorhizobium plurifarium	0.428877879	0.032417913	0.57600329	0.72
#N/A	k__Bacteria;p__Proteobacteria;c__Alphaproteobacteria;o__Rhodobacterales;f__Rhodobacteraceae;g__Thalassobacter;s__Thalassobacter stenotrophicus	0.428877879	0.032417913	0.57600329	0.72
#N/A	k__Bacteria;p__Proteobacteria;c__Alphaproteobacteria;o__Rhizobiales;f__Phyllobacteriaceae;g__Mesorhizobium;s__Mesorhizobium plurifarium	0.428877879	0.032417913	0.57600329	0.72
#N/A	k__Bacteria;p__Proteobacteria;c__Alphaproteobacteria;o__Rhodobacterales;f__Rhodobacteraceae;g__Thalassobacter;s__Thalassobacter stenotrophicus	0.428877879	0.032417913	0.57600329	0.72
unclassified	k__Bacteria;p__Proteobacteria;c__Deltaproteobacteria;o__Desulfovibrionales;f__Desulfovibrionaceae;g__Lawsonia;s__Lawsonia intracellularis	0.428608994	0.032538528	0.577615096	0.72
#N/A	k__Bacteria;p__Proteobacteria;c__Betaproteobacteria;o__Burkholderiales;f__Comamonadaceae;g__Delftia;s__Delftia acidovorans	0.428527688	0.03257507	0.57816424	0.72
unclassified	k__Bacteria;p__Proteobacteria;c__Deltaproteobacteria;o__Desulfovibrionales;f__Desulfovibrionaceae;g__Lawsonia;s__Lawsonia intracellularis	0.428488716	0.032592597	0.578382531	0.72
Diterpenoids	k__Bacteria;p__Proteobacteria;c__Betaproteobacteria;o__Neisseriales;f__Neisseriaceae;g__Neisseria;s__Neisseria lactamica	0.428331243	0.032663495	0.578614226	0.8
Diterpenoids	k__Bacteria;p__Proteobacteria;c__Betaproteobacteria;o__Neisseriales;f__Neisseriaceae;g__Kingella;s__Kingella denitrificans	0.428331243	0.032663495	0.578614226	0.8
unclassified	k__Bacteria;p__Proteobacteria;c__Deltaproteobacteria;o__Desulfovibrionales;f__Desulfovibrionaceae;g__Lawsonia;s__Lawsonia intracellularis	0.428195432	0.032724739	0.579199361	0.72
unclassified	k__Bacteria;p__Proteobacteria;c__Betaproteobacteria;o__Neisseriales;f__Neisseriaceae;g__Neisseria;s__Neisseria mucosa	0.428024427	0.032801985	0.579930871	0.52
Hypoxanthines	k__Bacteria;p__Proteobacteria;c__Gammaproteobacteria;o__Pasteurellales;f__Pasteurellaceae;g__Mannheimia;s__Mannheimia haemolytica	0.427993639	0.032815908	0.580130669	0.72
unclassified	k__Bacteria;p__Proteobacteria;c__Deltaproteobacteria;o__Desulfovibrionales;f__Desulfovibrionaceae;g__Lawsonia;s__Lawsonia intracellularis	0.427420416	0.033075991	0.58336731	0.8
unclassified	k__Bacteria;p__Proteobacteria;c__Deltaproteobacteria;o__Desulfovibrionales;f__Desulfovibrionaceae;g__Lawsonia;s__Lawsonia intracellularis	0.427420416	0.033075991	0.58336731	0.8
#N/A	k__Bacteria;p__Proteobacteria;c__Betaproteobacteria;o__Rhodocyclales;f__Rhodocyclaceae;g__;s__Rhodocyclaceae bacterium Paddy-1	0.427414472	0.033078697	0.58336731	0.8
Bile acids, alcohols and derivatives	k__Bacteria;p__Proteobacteria;c__Betaproteobacteria;o__Rhodocyclales;f__Rhodocyclaceae;g__;s__Rhodocyclaceae bacterium Paddy-1	0.427414472	0.033078697	0.58336731	0.8
unclassified	k__Bacteria;p__Proteobacteria;c__Betaproteobacteria;o__Rhodocyclales;f__Rhodocyclaceae;g__;s__Rhodocyclaceae bacterium Paddy-1	0.427414472	0.033078697	0.58336731	0.8
unclassified	k__Bacteria;p__Proteobacteria;c__Deltaproteobacteria;o__Desulfovibrionales;f__Desulfovibrionaceae;g__Lawsonia;s__Lawsonia intracellularis	0.427388473	0.033090532	0.583503067	0.92
Phenylmethylamines	k__Bacteria;p__Proteobacteria;c__Betaproteobacteria;o__Neisseriales;f__Neisseriaceae;g__Neisseria;s__Neisseria lactamica	0.42721271	0.033170637	0.584459126	0.76
Phenylmethylamines	k__Bacteria;p__Proteobacteria;c__Betaproteobacteria;o__Neisseriales;f__Neisseriaceae;g__Kingella;s__Kingella denitrificans	0.42721271	0.033170637	0.584459126	0.76
#N/A	k__Bacteria;p__Proteobacteria;c__Gammaproteobacteria;o__Pasteurellales;f__Pasteurellaceae;g__Mannheimia;s__Mannheimia haemolytica	0.427167397	0.033191313	0.5847955	0.84
unclassified	k__Bacteria;p__Proteobacteria;c__Gammaproteobacteria;o__Pasteurellales;f__Pasteurellaceae;g__Haemophilus;s__Haemophilus sputorum	0.426731218	0.03339087	0.587540048	0.48
Dipeptides	k__Bacteria;p__Proteobacteria;c__Betaproteobacteria;o__Burkholderiales;f__Comamonadaceae;g__Delftia;s__Delftia acidovorans	0.426687197	0.033411063	0.587796687	0.72
unclassified	k__Bacteria;p__Proteobacteria;c__Betaproteobacteria;o__Neisseriales;f__Neisseriaceae;g__Neisseria;s__Neisseria lactamica	0.426382068	0.033551299	0.588635107	0.8
unclassified	k__Bacteria;p__Proteobacteria;c__Betaproteobacteria;o__Neisseriales;f__Neisseriaceae;g__Kingella;s__Kingella denitrificans	0.426382068	0.033551299	0.588635107	0.8
unclassified	k__Bacteria;p__Proteobacteria;c__Deltaproteobacteria;o__Desulfovibrionales;f__Desulfovibrionaceae;g__Lawsonia;s__Lawsonia intracellularis	0.426374118	0.033554959	0.588689988	0.84
#N/A	k__Bacteria;p__Proteobacteria;c__Deltaproteobacteria;o__Desulfovibrionales;f__Desulfovibrionaceae;g__Lawsonia;s__Lawsonia intracellularis	0.426105141	0.033678979	0.590308819	0.28
#N/A	k__Bacteria;p__Proteobacteria;c__Deltaproteobacteria;o__Desulfovibrionales;f__Desulfovibrionaceae;g__Lawsonia;s__Lawsonia intracellularis	0.426038012	0.033709988	0.590703173	0.76
#N/A	k__Bacteria;p__Proteobacteria;c__Deltaproteobacteria;o__Desulfovibrionales;f__Desulfovibrionaceae;g__Lawsonia;s__Lawsonia intracellularis	0.426038012	0.033709988	0.590703173	0.76
#N/A	k__Bacteria;p__Proteobacteria;c__Deltaproteobacteria;o__Desulfovibrionales;f__Desulfovibrionaceae;g__Lawsonia;s__Lawsonia intracellularis	0.425918456	0.03376527	0.591320091	0.76
#N/A	k__Bacteria;p__Proteobacteria;c__Deltaproteobacteria;o__Desulfovibrionales;f__Desulfovibrionaceae;g__Lawsonia;s__Lawsonia intracellularis	0.425918456	0.03376527	0.591320091	0.76
unclassified	k__Bacteria;p__Proteobacteria;c__Gammaproteobacteria;o__Pasteurellales;f__Pasteurellaceae;g__Mannheimia;s__Mannheimia haemolytica	0.425800205	0.033820021	0.592175799	0.72
1-hydroxy-2-unsubstituted benzenoids	k__Bacteria;p__Proteobacteria;c__Gammaproteobacteria;o__Chromatiales;f__Chromatiaceae;g__Rheinheimera;s__Rheinheimera perlucida	0.425664291	0.033883036	0.592950724	0.8
Bile acids, alcohols and derivatives	k__Bacteria;p__Proteobacteria;c__Gammaproteobacteria;o__Chromatiales;f__Chromatiaceae;g__Rheinheimera;s__Rheinheimera perlucida	0.425664291	0.033883036	0.592950724	0.8
#N/A	k__Bacteria;p__Proteobacteria;c__Betaproteobacteria;o__Burkholderiales;f__Comamonadaceae;g__Ottowia;s__Ottowia thiooxydans	0.425575063	0.033924458	0.593397725	0.88
#N/A	k__Bacteria;p__Proteobacteria;c__Betaproteobacteria;o__Burkholderiales;f__Comamonadaceae;g__Ottowia;s__Ottowia thiooxydans	0.425439559	0.033987438	0.594223176	0.96
unclassified	k__Bacteria;p__Proteobacteria;c__Betaproteobacteria;o__Burkholderiales;f__Comamonadaceae;g__Ottowia;s__Ottowia thiooxydans	0.425439559	0.033987438	0.594223176	0.96
#N/A	k__Bacteria;p__Proteobacteria;c__Betaproteobacteria;o__Burkholderiales;f__Comamonadaceae;g__Ottowia;s__Ottowia thiooxydans	0.425439559	0.033987438	0.594223176	0.96
unclassified	k__Bacteria;p__Proteobacteria;c__Betaproteobacteria;o__Burkholderiales;f__Comamonadaceae;g__Ottowia;s__Ottowia thiooxydans	0.425439559	0.033987438	0.594223176	0.96
Curcuminoids	k__Bacteria;p__Proteobacteria;c__Betaproteobacteria;o__Burkholderiales;f__Comamonadaceae;g__Ottowia;s__Ottowia thiooxydans	0.425439559	0.033987438	0.594223176	0.96
Dialkylamines	k__Bacteria;p__Proteobacteria;c__Betaproteobacteria;o__Burkholderiales;f__Comamonadaceae;g__Ottowia;s__Ottowia thiooxydans	0.425439559	0.033987438	0.594223176	0.96
unclassified	k__Bacteria;p__Proteobacteria;c__Betaproteobacteria;o__Burkholderiales;f__Comamonadaceae;g__Ottowia;s__Ottowia thiooxydans	0.425439559	0.033987438	0.594223176	0.96
Phenylpyridines	k__Bacteria;p__Proteobacteria;c__Betaproteobacteria;o__Burkholderiales;f__Comamonadaceae;g__Ottowia;s__Ottowia thiooxydans	0.425439559	0.033987438	0.594223176	0.96
Bile acids, alcohols and derivatives	k__Bacteria;p__Proteobacteria;c__Betaproteobacteria;o__Burkholderiales;f__Comamonadaceae;g__Ottowia;s__Ottowia thiooxydans	0.425439559	0.033987438	0.594223176	0.96
#N/A	k__Bacteria;p__Proteobacteria;c__Betaproteobacteria;o__Burkholderiales;f__Comamonadaceae;g__Ottowia;s__Ottowia thiooxydans	0.425439559	0.033987438	0.594223176	0.96
unclassified	k__Bacteria;p__Proteobacteria;c__Betaproteobacteria;o__Burkholderiales;f__Comamonadaceae;g__Ottowia;s__Ottowia thiooxydans	0.425439559	0.033987438	0.594223176	0.96
unclassified	k__Bacteria;p__Proteobacteria;c__Betaproteobacteria;o__Burkholderiales;f__Comamonadaceae;g__Ottowia;s__Ottowia thiooxydans	0.425439559	0.033987438	0.594223176	0.96
unclassified	k__Bacteria;p__Proteobacteria;c__Gammaproteobacteria;o__Chromatiales;f__Chromatiaceae;g__Rheinheimera;s__Rheinheimera perlucida	0.42479606	0.034287799	0.59838708	0.48
Trihydroxy bile acids, alcohols and derivatives	k__Bacteria;p__Proteobacteria;c__Deltaproteobacteria;o__Myxococcales;f__Polyangiaceae;g__Chondromyces;s__Chondromyces apiculatus	0.424636292	0.0343627	0.599193283	0.56
Trihydroxy bile acids, alcohols and derivatives	k__Bacteria;p__Proteobacteria;c__Deltaproteobacteria;o__Myxococcales;f__Polyangiaceae;g__Chondromyces;s__Chondromyces apiculatus	0.424636292	0.0343627	0.599193283	0.56
unclassified	k__Bacteria;p__Proteobacteria;c__Gammaproteobacteria;o__Pasteurellales;f__Pasteurellaceae;g__Mannheimia;s__Mannheimia haemolytica	0.424446585	0.034451805	0.599547265	0.84
unclassified	k__Bacteria;p__Proteobacteria;c__Betaproteobacteria;o__Neisseriales;f__Neisseriaceae;g__Neisseria;s__Neisseria lactamica	0.423803416	0.034755273	0.602807592	0.16
unclassified	k__Bacteria;p__Proteobacteria;c__Betaproteobacteria;o__Neisseriales;f__Neisseriaceae;g__Kingella;s__Kingella denitrificans	0.423803416	0.034755273	0.602807592	0.16
#N/A	k__Bacteria;p__Proteobacteria;c__Gammaproteobacteria;o__Pasteurellales;f__Pasteurellaceae;g__Haemophilus;s__Haemophilus sputorum	0.423788329	0.034762416	0.602903866	0.44
unclassified	k__Bacteria;p__Proteobacteria;c__Betaproteobacteria;o__Burkholderiales;f__Alcaligenaceae;g__Oligella;s__Oligella ureolytica	0.423428621	0.034933092	0.605000902	0.92
unclassified	k__Bacteria;p__Proteobacteria;c__Betaproteobacteria;o__Burkholderiales;f__Alcaligenaceae;g__Oligella;s__Oligella ureolytica	0.423428621	0.034933092	0.605000902	0.92
#N/A	k__Bacteria;p__Proteobacteria;c__Betaproteobacteria;o__Burkholderiales;f__Alcaligenaceae;g__Oligella;s__Oligella ureolytica	0.423428621	0.034933092	0.605000902	0.92
unclassified	k__Bacteria;p__Proteobacteria;c__Betaproteobacteria;o__Burkholderiales;f__Alcaligenaceae;g__Oligella;s__Oligella ureolytica	0.423428621	0.034933092	0.605000902	0.92
unclassified	k__Bacteria;p__Proteobacteria;c__Betaproteobacteria;o__Burkholderiales;f__Comamonadaceae;g__Ottowia;s__Ottowia thiooxydans	0.42334823	0.034971327	0.60554934	0.84
#N/A	k__Bacteria;p__Proteobacteria;c__Deltaproteobacteria;o__Desulfovibrionales;f__Desulfovibrionaceae;g__Lawsonia;s__Lawsonia intracellularis	0.42316758	0.035057369	0.606670107	0.28
#N/A	k__Bacteria;p__Proteobacteria;c__Betaproteobacteria;o__Neisseriales;f__Neisseriaceae;g__Neisseria;s__Neisseria elongata;t__Neisseria elongata subsp. glycolytica	0.423066489	0.035105591	0.607322874	0.32
unclassified	k__Bacteria;p__Proteobacteria;c__Gammaproteobacteria;o__Enterobacterales;f__Yersiniaceae;g__Yersinia;s__Yersinia pestis	0.422822319	0.035222281	0.608798973	0.32
unclassified	k__Bacteria;p__Proteobacteria;c__Gammaproteobacteria;o__Pasteurellales;f__Pasteurellaceae;g__Mannheimia;s__Mannheimia haemolytica	0.42265092	0.035304378	0.609821755	0.88
Alpha amino acids	k__Bacteria;p__Proteobacteria;c__Betaproteobacteria;o__Burkholderiales;f__Comamonadaceae;g__Delftia;s__Delftia acidovorans	0.422265861	0.03548937	0.611428546	0.4
unclassified	k__Bacteria;p__Proteobacteria;c__Deltaproteobacteria;o__Myxococcales;f__Polyangiaceae;g__Chondromyces;s__Chondromyces apiculatus	0.422202805	0.035519737	0.611504152	0.64
unclassified	k__Bacteria;p__Proteobacteria;c__Gammaproteobacteria;o__Pasteurellales;f__Pasteurellaceae;g__Haemophilus;s__Haemophilus sputorum	0.42170645	0.035759498	0.614875951	0.88
unclassified	k__Bacteria;p__Proteobacteria;c__Betaproteobacteria;o__Burkholderiales;f__Alcaligenaceae;g__Oligella;s__Oligella ureolytica	0.421664335	0.0357799	0.61513116	0.92
unclassified	k__Bacteria;p__Proteobacteria;c__Gammaproteobacteria;o__Enterobacterales;f__Yersiniaceae;g__Yersinia;s__Yersinia pestis	0.421595814	0.035813115	0.615491771	0.84
#N/A	k__Bacteria;p__Proteobacteria;c__Deltaproteobacteria;o__Desulfovibrionales;f__Desulfovibrionaceae;g__Lawsonia;s__Lawsonia intracellularis	0.421280911	0.035966074	0.617484828	0.84
unclassified	k__Bacteria;p__Proteobacteria;c__Gammaproteobacteria;o__Enterobacterales;f__Yersiniaceae;g__Yersinia;s__Yersinia pestis	0.420970579	0.036117322	0.618948716	0.8
unclassified	k__Bacteria;p__Proteobacteria;c__Gammaproteobacteria;o__Pasteurellales;f__Pasteurellaceae;g__Mannheimia;s__Mannheimia haemolytica	0.420770213	0.036215243	0.620048047	0.92
Hypoxanthines	k__Bacteria;p__Proteobacteria;c__Gammaproteobacteria;o__Pasteurellales;f__Pasteurellaceae;g__Mannheimia;s__Mannheimia haemolytica	0.420770213	0.036215243	0.620048047	0.92
#N/A	k__Bacteria;p__Proteobacteria;c__Gammaproteobacteria;o__Pasteurellales;f__Pasteurellaceae;g__Mannheimia;s__Mannheimia haemolytica	0.420770213	0.036215243	0.620048047	0.92
unclassified	k__Bacteria;p__Proteobacteria;c__Gammaproteobacteria;o__Pasteurellales;f__Pasteurellaceae;g__Mannheimia;s__Mannheimia haemolytica	0.420770213	0.036215243	0.620048047	0.92
#N/A	k__Bacteria;p__Proteobacteria;c__Gammaproteobacteria;o__Pasteurellales;f__Pasteurellaceae;g__Mannheimia;s__Mannheimia haemolytica	0.420770213	0.036215243	0.620048047	0.92
unclassified	k__Bacteria;p__Proteobacteria;c__Gammaproteobacteria;o__Pasteurellales;f__Pasteurellaceae;g__Mannheimia;s__Mannheimia haemolytica	0.420770213	0.036215243	0.620048047	0.92
#N/A	k__Bacteria;p__Proteobacteria;c__Deltaproteobacteria;o__Desulfovibrionales;f__Desulfovibrionaceae;g__Lawsonia;s__Lawsonia intracellularis	0.420558785	0.036318799	0.621200704	0.8
#N/A	k__Bacteria;p__Proteobacteria;c__Deltaproteobacteria;o__Desulfovibrionales;f__Desulfovibrionaceae;g__Lawsonia;s__Lawsonia intracellularis	0.42055331	0.036321483	0.621231127	0.84
unclassified	k__Bacteria;p__Proteobacteria;c__Betaproteobacteria;o__Burkholderiales;f__Alcaligenaceae;g__Oligella;s__Oligella ureolytica	0.420547205	0.036324478	0.621249813	0.68
unclassified	k__Bacteria;p__Proteobacteria;c__Deltaproteobacteria;o__Myxococcales;f__Polyangiaceae;g__Chondromyces;s__Chondromyces apiculatus	0.42024343	0.036473695	0.622858218	0.68
unclassified	k__Bacteria;p__Proteobacteria;c__Deltaproteobacteria;o__Desulfovibrionales;f__Desulfovibrionaceae;g__Lawsonia;s__Lawsonia intracellularis	0.419807988	0.036688437	0.625926334	0.72
unclassified	k__Bacteria;p__Proteobacteria;c__Deltaproteobacteria;o__Desulfovibrionales;f__Desulfovibrionaceae;g__Lawsonia;s__Lawsonia intracellularis	0.419609902	0.036786456	0.627199388	0.92
unclassified	k__Bacteria;p__Proteobacteria;c__Deltaproteobacteria;o__Desulfovibrionales;f__Desulfovibrionaceae;g__Lawsonia;s__Lawsonia intracellularis	0.419609902	0.036786456	0.627199388	0.92
Trihydroxy bile acids, alcohols and derivatives	k__Bacteria;p__Proteobacteria;c__Gammaproteobacteria;o__Pasteurellales;f__Pasteurellaceae;g__Haemophilus;s__Haemophilus sputorum	0.419505532	0.036838186	0.627871156	0.56
unclassified	k__Bacteria;p__Proteobacteria;c__Deltaproteobacteria;o__Desulfovibrionales;f__Desulfovibrionaceae;g__Lawsonia;s__Lawsonia intracellularis	0.41949215	0.036844823	0.627888419	0.92
unclassified	k__Bacteria;p__Proteobacteria;c__Deltaproteobacteria;o__Desulfovibrionales;f__Desulfovibrionaceae;g__Lawsonia;s__Lawsonia intracellularis	0.41949215	0.036844823	0.627888419	0.92
unclassified	k__Bacteria;p__Proteobacteria;c__Gammaproteobacteria;o__Thiotrichales;f__Francisellaceae;g__Francisella;s__Francisella tularensis;t__Francisella tularensis subsp. holarctica	0.41943031	0.036875504	0.62805245	0.52
unclassified	k__Bacteria;p__Proteobacteria;c__Gammaproteobacteria;o__Thiotrichales;f__Francisellaceae;g__Francisella;s__Francisella sp. W12-1067	0.41943031	0.036875504	0.62805245	0.52
#N/A	k__Bacteria;p__Proteobacteria;c__Gammaproteobacteria;o__Enterobacterales;f__Yersiniaceae;g__Yersinia;s__Yersinia pestis	0.418884845	0.037147014	0.631663412	0.8
Steroid acids	k__Bacteria;p__Proteobacteria;c__Gammaproteobacteria;o__Thiotrichales;f__Francisellaceae;g__Francisella;s__Francisella tularensis;t__Francisella tularensis subsp. holarctica	0.41882204	0.037178378	0.631713239	0.6
Steroid acids	k__Bacteria;p__Proteobacteria;c__Gammaproteobacteria;o__Thiotrichales;f__Francisellaceae;g__Francisella;s__Francisella sp. W12-1067	0.41882204	0.037178378	0.631713239	0.6
Oligopeptides	k__Bacteria;p__Proteobacteria;c__Betaproteobacteria;o__Burkholderiales;f__Comamonadaceae;g__Ottowia;s__Ottowia thiooxydans	0.418762339	0.037208211	0.63208423	0.76
unclassified	k__Bacteria;p__Proteobacteria;c__Betaproteobacteria;o__Burkholderiales;f__Comamonadaceae;g__Ottowia;s__Ottowia thiooxydans	0.418750262	0.037214248	0.63217708	0.88
unclassified	k__Bacteria;p__Proteobacteria;c__Betaproteobacteria;o__Neisseriales;f__Neisseriaceae;g__Neisseria;s__Neisseria elongata;t__Neisseria elongata subsp. glycolytica	0.418585367	0.037296756	0.632195639	0.8
Hydroxyindoles	k__Bacteria;p__Proteobacteria;c__Gammaproteobacteria;o__Chromatiales;f__Chromatiaceae;g__Rheinheimera;s__Rheinheimera perlucida	0.418350472	0.03741454	0.632858658	0.8
unclassified	k__Bacteria;p__Proteobacteria;c__Gammaproteobacteria;o__Chromatiales;f__Chromatiaceae;g__Rheinheimera;s__Rheinheimera perlucida	0.418350472	0.03741454	0.632858658	0.8
unclassified	k__Bacteria;p__Proteobacteria;c__Gammaproteobacteria;o__Thiotrichales;f__Francisellaceae;g__Francisella;s__Francisella tularensis;t__Francisella tularensis subsp. holarctica	0.418270456	0.03745473	0.633102883	0.68
unclassified	k__Bacteria;p__Proteobacteria;c__Gammaproteobacteria;o__Thiotrichales;f__Francisellaceae;g__Francisella;s__Francisella sp. W12-1067	0.418270456	0.03745473	0.633102883	0.68
unclassified	k__Bacteria;p__Proteobacteria;c__Betaproteobacteria;o__Burkholderiales;f__Alcaligenaceae;g__Oligella;s__Oligella ureolytica	0.418135764	0.03752246	0.634015249	0.92
#N/A	k__Bacteria;p__Proteobacteria;c__Betaproteobacteria;o__Burkholderiales;f__Alcaligenaceae;g__Oligella;s__Oligella ureolytica	0.417938574	0.037621792	0.635198888	0.8
Pyridinecarboxylic acids	k__Bacteria;p__Proteobacteria;c__Gammaproteobacteria;o__Pasteurellales;f__Pasteurellaceae;g__Mannheimia;s__Mannheimia haemolytica	0.417644557	0.037770287	0.637062976	0.84
unclassified	k__Bacteria;p__Proteobacteria;c__Betaproteobacteria;o__Neisseriales;f__Neisseriaceae;g__Neisseria;s__Neisseria mucosa	0.417287805	0.037951091	0.637719379	0.88
unclassified	k__Bacteria;p__Proteobacteria;c__Gammaproteobacteria;o__Pasteurellales;f__Pasteurellaceae;g__Haemophilus;s__Haemophilus sputorum	0.417218006	0.037986545	0.637719379	0.72
unclassified	k__Bacteria;p__Proteobacteria;c__Deltaproteobacteria;o__Myxococcales;f__Polyangiaceae;g__Chondromyces;s__Chondromyces apiculatus	0.416814811	0.038191864	0.637719379	0.72
unclassified	k__Bacteria;p__Proteobacteria;c__Betaproteobacteria;o__Burkholderiales;f__Alcaligenaceae;g__Oligella;s__Oligella ureolytica	0.416555491	0.038324381	0.637719379	0.88
Dipeptides	k__Bacteria;p__Proteobacteria;c__Gammaproteobacteria;o__Chromatiales;f__Chromatiaceae;g__Rheinheimera;s__Rheinheimera perlucida	0.416451247	0.038377755	0.637719379	0.56
unclassified	k__Bacteria;p__Proteobacteria;c__Deltaproteobacteria;o__Desulfovibrionales;f__Desulfovibrionaceae;g__Lawsonia;s__Lawsonia intracellularis	0.416429312	0.038388992	0.637719379	0.88
unclassified	k__Bacteria;p__Proteobacteria;c__Betaproteobacteria;o__Rhodocyclales;f__Rhodocyclaceae;g__;s__Rhodocyclaceae bacterium Paddy-1	0.416158906	0.038527748	0.637719379	0.48
#N/A	k__Bacteria;p__Proteobacteria;c__Alphaproteobacteria;o__Rhizobiales;f__Phyllobacteriaceae;g__Mesorhizobium;s__Mesorhizobium plurifarium	0.415523546	0.03885534	0.637719379	0.76
#N/A	k__Bacteria;p__Proteobacteria;c__Alphaproteobacteria;o__Rhodobacterales;f__Rhodobacteraceae;g__Thalassobacter;s__Thalassobacter stenotrophicus	0.415523546	0.03885534	0.637719379	0.76
unclassified	k__Bacteria;p__Proteobacteria;c__Alphaproteobacteria;o__Rhizobiales;f__Phyllobacteriaceae;g__Mesorhizobium;s__Mesorhizobium plurifarium	0.415523546	0.03885534	0.637719379	0.76
unclassified	k__Bacteria;p__Proteobacteria;c__Alphaproteobacteria;o__Rhodobacterales;f__Rhodobacteraceae;g__Thalassobacter;s__Thalassobacter stenotrophicus	0.415523546	0.03885534	0.637719379	0.76
unclassified	k__Bacteria;p__Proteobacteria;c__Alphaproteobacteria;o__Rhizobiales;f__Phyllobacteriaceae;g__Mesorhizobium;s__Mesorhizobium plurifarium	0.415523546	0.03885534	0.637719379	0.76
unclassified	k__Bacteria;p__Proteobacteria;c__Alphaproteobacteria;o__Rhodobacterales;f__Rhodobacteraceae;g__Thalassobacter;s__Thalassobacter stenotrophicus	0.415523546	0.03885534	0.637719379	0.76
unclassified	k__Bacteria;p__Proteobacteria;c__Deltaproteobacteria;o__Desulfovibrionales;f__Desulfovibrionaceae;g__Lawsonia;s__Lawsonia intracellularis	0.415489701	0.038872852	0.637860933	0.88
unclassified	k__Bacteria;p__Proteobacteria;c__Deltaproteobacteria;o__Desulfovibrionales;f__Desulfovibrionaceae;g__Lawsonia;s__Lawsonia intracellularis	0.415460104	0.038888171	0.638075173	0.84
#N/A	k__Bacteria;p__Proteobacteria;c__Betaproteobacteria;o__Burkholderiales;f__Comamonadaceae;g__Ottowia;s__Ottowia thiooxydans	0.415459367	0.038888553	0.638075173	0.64
unclassified	k__Bacteria;p__Proteobacteria;c__Betaproteobacteria;o__Neisseriales;f__Neisseriaceae;g__Neisseria;s__Neisseria elongata;t__Neisseria elongata subsp. glycolytica	0.415256738	0.038993562	0.639138397	0.68
#N/A	k__Bacteria;p__Proteobacteria;c__Betaproteobacteria;o__Neisseriales;f__Neisseriaceae;g__Neisseria;s__Neisseria mucosa	0.415048906	0.039101501	0.639181086	0.2
#N/A	k__Bacteria;p__Proteobacteria;c__Deltaproteobacteria;o__Desulfovibrionales;f__Desulfovibrionaceae;g__Lawsonia;s__Lawsonia intracellularis	0.41484892	0.039205588	0.640465424	0.84
unclassified	k__Bacteria;p__Proteobacteria;c__Deltaproteobacteria;o__Myxococcales;f__Polyangiaceae;g__Chondromyces;s__Chondromyces apiculatus	0.414751372	0.039256439	0.640681203	0.72
unclassified	k__Bacteria;p__Proteobacteria;c__Gammaproteobacteria;o__Thiotrichales;f__Francisellaceae;g__Francisella;s__Francisella tularensis;t__Francisella tularensis subsp. holarctica	0.414751372	0.039256439	0.640681203	0.72
unclassified	k__Bacteria;p__Proteobacteria;c__Gammaproteobacteria;o__Thiotrichales;f__Francisellaceae;g__Francisella;s__Francisella sp. W12-1067	0.414751372	0.039256439	0.640681203	0.72
unclassified	k__Bacteria;p__Proteobacteria;c__Deltaproteobacteria;o__Desulfovibrionales;f__Desulfovibrionaceae;g__Lawsonia;s__Lawsonia intracellularis	0.414586402	0.039342554	0.641720293	0.68
unclassified	k__Bacteria;p__Proteobacteria;c__Deltaproteobacteria;o__Desulfovibrionales;f__Desulfovibrionaceae;g__Lawsonia;s__Lawsonia intracellularis	0.41447006	0.039403376	0.642018525	0.68
unclassified	k__Bacteria;p__Proteobacteria;c__Betaproteobacteria;o__Neisseriales;f__Neisseriaceae;g__Neisseria;s__Neisseria mucosa	0.41436289	0.039459468	0.642705286	0.88
Dipeptides	k__Bacteria;p__Proteobacteria;c__Betaproteobacteria;o__Burkholderiales;f__Comamonadaceae;g__Ottowia;s__Ottowia thiooxydans	0.414354314	0.039463959	0.642768978	0.76
Triterpenoids	k__Bacteria;p__Proteobacteria;c__Betaproteobacteria;o__Neisseriales;f__Neisseriaceae;g__Neisseria;s__Neisseria mucosa	0.414274754	0.039505645	0.642973615	0.72
Quinolines and derivatives	k__Bacteria;p__Proteobacteria;c__Deltaproteobacteria;o__Myxococcales;f__Polyangiaceae;g__Chondromyces;s__Chondromyces apiculatus	0.414143373	0.039574559	0.642973615	0.52
Monohydroxy bile acids, alcohols and derivatives	k__Bacteria;p__Proteobacteria;c__Deltaproteobacteria;o__Myxococcales;f__Polyangiaceae;g__Chondromyces;s__Chondromyces apiculatus	0.414143373	0.039574559	0.642973615	0.52
#N/A	k__Bacteria;p__Proteobacteria;c__Gammaproteobacteria;o__Enterobacterales;f__Yersiniaceae;g__Yersinia;s__Yersinia pestis	0.413911287	0.039696529	0.642973615	0.88
#N/A	k__Bacteria;p__Proteobacteria;c__Deltaproteobacteria;o__Desulfovibrionales;f__Desulfovibrionaceae;g__Lawsonia;s__Lawsonia intracellularis	0.413461118	0.039933958	0.642973615	0.8
Dipeptides	k__Bacteria;p__Proteobacteria;c__Betaproteobacteria;o__Rhodocyclales;f__Rhodocyclaceae;g__;s__Rhodocyclaceae bacterium Paddy-1	0.413449115	0.039940304	0.642973615	0.56
unclassified	k__Bacteria;p__Proteobacteria;c__Deltaproteobacteria;o__Desulfovibrionales;f__Desulfovibrionaceae;g__Lawsonia;s__Lawsonia intracellularis	0.413414866	0.039958416	0.642973615	0.52
Dipeptides	k__Bacteria;p__Proteobacteria;c__Gammaproteobacteria;o__Pasteurellales;f__Pasteurellaceae;g__Mannheimia;s__Mannheimia haemolytica	0.41338828	0.03997248	0.642973615	0.92
#N/A	k__Bacteria;p__Proteobacteria;c__Gammaproteobacteria;o__Thiotrichales;f__Francisellaceae;g__Francisella;s__Francisella tularensis;t__Francisella tularensis subsp. holarctica	0.413194444	0.040075137	0.642973615	0.92
#N/A	k__Bacteria;p__Proteobacteria;c__Gammaproteobacteria;o__Thiotrichales;f__Francisellaceae;g__Francisella;s__Francisella sp. W12-1067	0.413194444	0.040075137	0.642973615	0.92
Dipeptides	k__Bacteria;p__Proteobacteria;c__Gammaproteobacteria;o__Thiotrichales;f__Francisellaceae;g__Francisella;s__Francisella tularensis;t__Francisella tularensis subsp. holarctica	0.413194444	0.040075137	0.642973615	0.92
Dipeptides	k__Bacteria;p__Proteobacteria;c__Gammaproteobacteria;o__Thiotrichales;f__Francisellaceae;g__Francisella;s__Francisella sp. W12-1067	0.413194444	0.040075137	0.642973615	0.92
#N/A	k__Bacteria;p__Proteobacteria;c__Gammaproteobacteria;o__Thiotrichales;f__Francisellaceae;g__Francisella;s__Francisella tularensis;t__Francisella tularensis subsp. holarctica	0.413194444	0.040075137	0.642973615	0.92
#N/A	k__Bacteria;p__Proteobacteria;c__Gammaproteobacteria;o__Thiotrichales;f__Francisellaceae;g__Francisella;s__Francisella sp. W12-1067	0.413194444	0.040075137	0.642973615	0.92
unclassified	k__Bacteria;p__Proteobacteria;c__Deltaproteobacteria;o__Myxococcales;f__Polyangiaceae;g__Chondromyces;s__Chondromyces apiculatus	0.413194444	0.040075137	0.642973615	0.92
Acyl carnitines	k__Bacteria;p__Proteobacteria;c__Gammaproteobacteria;o__Thiotrichales;f__Francisellaceae;g__Francisella;s__Francisella tularensis;t__Francisella tularensis subsp. holarctica	0.413194444	0.040075137	0.642973615	0.92
Acyl carnitines	k__Bacteria;p__Proteobacteria;c__Gammaproteobacteria;o__Thiotrichales;f__Francisellaceae;g__Francisella;s__Francisella sp. W12-1067	0.413194444	0.040075137	0.642973615	0.92
#N/A	k__Bacteria;p__Proteobacteria;c__Gammaproteobacteria;o__Thiotrichales;f__Francisellaceae;g__Francisella;s__Francisella tularensis;t__Francisella tularensis subsp. holarctica	0.413194444	0.040075137	0.642973615	0.92
#N/A	k__Bacteria;p__Proteobacteria;c__Gammaproteobacteria;o__Thiotrichales;f__Francisellaceae;g__Francisella;s__Francisella sp. W12-1067	0.413194444	0.040075137	0.642973615	0.92
Diphenylmethanes	k__Bacteria;p__Proteobacteria;c__Gammaproteobacteria;o__Thiotrichales;f__Francisellaceae;g__Francisella;s__Francisella tularensis;t__Francisella tularensis subsp. holarctica	0.413194444	0.040075137	0.642973615	0.92
Diphenylmethanes	k__Bacteria;p__Proteobacteria;c__Gammaproteobacteria;o__Thiotrichales;f__Francisellaceae;g__Francisella;s__Francisella sp. W12-1067	0.413194444	0.040075137	0.642973615	0.92
#N/A	k__Bacteria;p__Proteobacteria;c__Deltaproteobacteria;o__Myxococcales;f__Polyangiaceae;g__Chondromyces;s__Chondromyces apiculatus	0.413194444	0.040075137	0.642973615	0.92
unclassified	k__Bacteria;p__Proteobacteria;c__Gammaproteobacteria;o__Thiotrichales;f__Francisellaceae;g__Francisella;s__Francisella tularensis;t__Francisella tularensis subsp. holarctica	0.413194444	0.040075137	0.642973615	0.92
unclassified	k__Bacteria;p__Proteobacteria;c__Gammaproteobacteria;o__Thiotrichales;f__Francisellaceae;g__Francisella;s__Francisella sp. W12-1067	0.413194444	0.040075137	0.642973615	0.92
#N/A	k__Bacteria;p__Proteobacteria;c__Gammaproteobacteria;o__Thiotrichales;f__Francisellaceae;g__Francisella;s__Francisella tularensis;t__Francisella tularensis subsp. holarctica	0.413194444	0.040075137	0.642973615	0.92
#N/A	k__Bacteria;p__Proteobacteria;c__Gammaproteobacteria;o__Thiotrichales;f__Francisellaceae;g__Francisella;s__Francisella sp. W12-1067	0.413194444	0.040075137	0.642973615	0.92
Benzodioxoles	k__Bacteria;p__Proteobacteria;c__Deltaproteobacteria;o__Myxococcales;f__Polyangiaceae;g__Chondromyces;s__Chondromyces apiculatus	0.413194444	0.040075137	0.642973615	0.92
Dipeptides	k__Bacteria;p__Proteobacteria;c__Gammaproteobacteria;o__Thiotrichales;f__Francisellaceae;g__Francisella;s__Francisella tularensis;t__Francisella tularensis subsp. holarctica	0.413194444	0.040075137	0.642973615	0.92
Dipeptides	k__Bacteria;p__Proteobacteria;c__Gammaproteobacteria;o__Thiotrichales;f__Francisellaceae;g__Francisella;s__Francisella sp. W12-1067	0.413194444	0.040075137	0.642973615	0.92
Dipeptides	k__Bacteria;p__Proteobacteria;c__Gammaproteobacteria;o__Thiotrichales;f__Francisellaceae;g__Francisella;s__Francisella tularensis;t__Francisella tularensis subsp. holarctica	0.413194444	0.040075137	0.642973615	0.92
Dipeptides	k__Bacteria;p__Proteobacteria;c__Gammaproteobacteria;o__Thiotrichales;f__Francisellaceae;g__Francisella;s__Francisella sp. W12-1067	0.413194444	0.040075137	0.642973615	0.92
unclassified	k__Bacteria;p__Proteobacteria;c__Gammaproteobacteria;o__Thiotrichales;f__Francisellaceae;g__Francisella;s__Francisella tularensis;t__Francisella tularensis subsp. holarctica	0.413194444	0.040075137	0.642973615	0.92
unclassified	k__Bacteria;p__Proteobacteria;c__Gammaproteobacteria;o__Thiotrichales;f__Francisellaceae;g__Francisella;s__Francisella sp. W12-1067	0.413194444	0.040075137	0.642973615	0.92
Monohydroxy bile acids, alcohols and derivatives	k__Bacteria;p__Proteobacteria;c__Betaproteobacteria;o__Burkholderiales;f__Alcaligenaceae;g__Oligella;s__Oligella ureolytica	0.412962902	0.040198036	0.644366417	0.6
unclassified	k__Bacteria;p__Proteobacteria;c__Betaproteobacteria;o__Burkholderiales;f__Comamonadaceae;g__Ottowia;s__Ottowia thiooxydans	0.412884973	0.040239467	0.64491092	0.76
Monohydroxy bile acids, alcohols and derivatives	k__Bacteria;p__Proteobacteria;c__Gammaproteobacteria;o__Pasteurellales;f__Pasteurellaceae;g__Mannheimia;s__Mannheimia haemolytica	0.412846298	0.040260041	0.645116962	0.6
Oligopeptides	k__Bacteria;p__Proteobacteria;c__Deltaproteobacteria;o__Desulfovibrionales;f__Desulfovibrionaceae;g__Lawsonia;s__Lawsonia intracellularis	0.412582868	0.040400399	0.646775868	0.92
unclassified	k__Bacteria;p__Proteobacteria;c__Betaproteobacteria;o__Burkholderiales;f__Alcaligenaceae;g__Oligella;s__Oligella ureolytica	0.41230819	0.040547163	0.648561099	0.72
unclassified	k__Bacteria;p__Proteobacteria;c__Betaproteobacteria;o__Neisseriales;f__Neisseriaceae;g__Neisseria;s__Neisseria mucosa	0.411732936	0.040855892	0.65123051	0.2
unclassified	k__Bacteria;p__Proteobacteria;c__Betaproteobacteria;o__Neisseriales;f__Neisseriaceae;g__Neisseria;s__Neisseria mucosa	0.411437976	0.041014911	0.65123051	0.88
Trihydroxy bile acids, alcohols and derivatives	k__Bacteria;p__Proteobacteria;c__Betaproteobacteria;o__Neisseriales;f__Neisseriaceae;g__Neisseria;s__Neisseria mucosa	0.411437976	0.041014911	0.65123051	0.88
unclassified	k__Bacteria;p__Proteobacteria;c__Betaproteobacteria;o__Burkholderiales;f__Comamonadaceae;g__Ottowia;s__Ottowia thiooxydans	0.411437976	0.041014911	0.65123051	0.88
unclassified	k__Bacteria;p__Proteobacteria;c__Deltaproteobacteria;o__Desulfovibrionales;f__Desulfovibrionaceae;g__Lawsonia;s__Lawsonia intracellularis	0.411294979	0.04109218	0.65123051	0.52
unclassified	k__Bacteria;p__Proteobacteria;c__Gammaproteobacteria;o__Pasteurellales;f__Pasteurellaceae;g__Mannheimia;s__Mannheimia haemolytica	0.4110734	0.041212137	0.65123051	0.8
Monohydroxy bile acids, alcohols and derivatives	k__Bacteria;p__Proteobacteria;c__Deltaproteobacteria;o__Desulfovibrionales;f__Desulfovibrionaceae;g__Lawsonia;s__Lawsonia intracellularis	0.410989776	0.041257481	0.65123051	0.64
#N/A	k__Bacteria;p__Proteobacteria;c__Gammaproteobacteria;o__Chromatiales;f__Chromatiaceae;g__Rheinheimera;s__Rheinheimera perlucida	0.410876218	0.041319118	0.65123051	0.6
unclassified	k__Bacteria;p__Proteobacteria;c__Gammaproteobacteria;o__Enterobacterales;f__Yersiniaceae;g__Yersinia;s__Yersinia pestis	0.410736274	0.041395179	0.65123051	0.72
unclassified	k__Bacteria;p__Proteobacteria;c__Deltaproteobacteria;o__Desulfovibrionales;f__Desulfovibrionaceae;g__Lawsonia;s__Lawsonia intracellularis	0.410724046	0.04140183	0.65123051	0.92
#N/A	k__Bacteria;p__Proteobacteria;c__Deltaproteobacteria;o__Desulfovibrionales;f__Desulfovibrionaceae;g__Lawsonia;s__Lawsonia intracellularis	0.410724046	0.04140183	0.65123051	0.92
#N/A	k__Bacteria;p__Proteobacteria;c__Gammaproteobacteria;o__Thiotrichales;f__Francisellaceae;g__Francisella;s__Francisella tularensis;t__Francisella tularensis subsp. holarctica	0.410624492	0.041456012	0.65123051	0.72
#N/A	k__Bacteria;p__Proteobacteria;c__Gammaproteobacteria;o__Thiotrichales;f__Francisellaceae;g__Francisella;s__Francisella sp. W12-1067	0.410624492	0.041456012	0.65123051	0.72
unclassified	k__Bacteria;p__Proteobacteria;c__Deltaproteobacteria;o__Desulfovibrionales;f__Desulfovibrionaceae;g__Lawsonia;s__Lawsonia intracellularis	0.410608787	0.041464565	0.65123051	0.92
#N/A	k__Bacteria;p__Proteobacteria;c__Deltaproteobacteria;o__Desulfovibrionales;f__Desulfovibrionaceae;g__Lawsonia;s__Lawsonia intracellularis	0.410608787	0.041464565	0.65123051	0.92
#N/A	k__Bacteria;p__Proteobacteria;c__Deltaproteobacteria;o__Desulfovibrionales;f__Desulfovibrionaceae;g__Lawsonia;s__Lawsonia intracellularis	0.410534445	0.041505068	0.65123051	0.76
Xanthines	k__Bacteria;p__Proteobacteria;c__Betaproteobacteria;o__Burkholderiales;f__Comamonadaceae;g__Ottowia;s__Ottowia thiooxydans	0.410463004	0.041544021	0.65123051	0.88
Dipeptides	k__Bacteria;p__Proteobacteria;c__Betaproteobacteria;o__Burkholderiales;f__Comamonadaceae;g__Ottowia;s__Ottowia thiooxydans	0.410463004	0.041544021	0.65123051	0.88
#N/A	k__Bacteria;p__Proteobacteria;c__Deltaproteobacteria;o__Desulfovibrionales;f__Desulfovibrionaceae;g__Lawsonia;s__Lawsonia intracellularis	0.41041924	0.041567897	0.65123051	0.76
Dipeptides	k__Bacteria;p__Proteobacteria;c__Gammaproteobacteria;o__Pasteurellales;f__Pasteurellaceae;g__Mannheimia;s__Mannheimia haemolytica	0.410344433	0.041608734	0.65123051	0.88
Bile acids, alcohols and derivatives	k__Bacteria;p__Proteobacteria;c__Gammaproteobacteria;o__Pasteurellales;f__Pasteurellaceae;g__Mannheimia;s__Mannheimia haemolytica	0.410344122	0.041608904	0.65123051	0.76
unclassified	k__Bacteria;p__Proteobacteria;c__Deltaproteobacteria;o__Desulfovibrionales;f__Desulfovibrionaceae;g__Lawsonia;s__Lawsonia intracellularis	0.41030497	0.04163029	0.65123051	0.96
unclassified	k__Bacteria;p__Proteobacteria;c__Deltaproteobacteria;o__Desulfovibrionales;f__Desulfovibrionaceae;g__Lawsonia;s__Lawsonia intracellularis	0.41030497	0.04163029	0.65123051	0.96
unclassified	k__Bacteria;p__Proteobacteria;c__Deltaproteobacteria;o__Desulfovibrionales;f__Desulfovibrionaceae;g__Lawsonia;s__Lawsonia intracellularis	0.41030497	0.04163029	0.65123051	0.96
unclassified	k__Bacteria;p__Proteobacteria;c__Deltaproteobacteria;o__Desulfovibrionales;f__Desulfovibrionaceae;g__Lawsonia;s__Lawsonia intracellularis	0.41030497	0.04163029	0.65123051	0.96
unclassified	k__Bacteria;p__Proteobacteria;c__Deltaproteobacteria;o__Desulfovibrionales;f__Desulfovibrionaceae;g__Lawsonia;s__Lawsonia intracellularis	0.41030497	0.04163029	0.65123051	0.96
Oligopeptides	k__Bacteria;p__Proteobacteria;c__Deltaproteobacteria;o__Desulfovibrionales;f__Desulfovibrionaceae;g__Lawsonia;s__Lawsonia intracellularis	0.41030497	0.04163029	0.65123051	0.96
unclassified	k__Bacteria;p__Proteobacteria;c__Gammaproteobacteria;o__Pasteurellales;f__Pasteurellaceae;g__Mannheimia;s__Mannheimia haemolytica	0.410162325	0.04170828	0.65123051	0.84
unclassified	k__Bacteria;p__Proteobacteria;c__Betaproteobacteria;o__Rhodocyclales;f__Rhodocyclaceae;g__;s__Rhodocyclaceae bacterium Paddy-1	0.410023843	0.041784104	0.651283894	0.76
unclassified	k__Bacteria;p__Proteobacteria;c__Gammaproteobacteria;o__Thiotrichales;f__Francisellaceae;g__Francisella;s__Francisella tularensis;t__Francisella tularensis subsp. holarctica	0.409960031	0.04181908	0.651559489	0.44
unclassified	k__Bacteria;p__Proteobacteria;c__Gammaproteobacteria;o__Thiotrichales;f__Francisellaceae;g__Francisella;s__Francisella sp. W12-1067	0.409960031	0.04181908	0.651559489	0.44
unclassified	k__Bacteria;p__Proteobacteria;c__Betaproteobacteria;o__Neisseriales;f__Neisseriaceae;g__Neisseria;s__Neisseria lactamica	0.409859362	0.041874304	0.65220997	0.6
unclassified	k__Bacteria;p__Proteobacteria;c__Betaproteobacteria;o__Neisseriales;f__Neisseriaceae;g__Kingella;s__Kingella denitrificans	0.409859362	0.041874304	0.65220997	0.6
#N/A	k__Bacteria;p__Proteobacteria;c__Betaproteobacteria;o__Burkholderiales;f__Comamonadaceae;g__Delftia;s__Delftia acidovorans	0.409844133	0.041882663	0.652270099	0.92
#N/A	k__Bacteria;p__Proteobacteria;c__Betaproteobacteria;o__Burkholderiales;f__Comamonadaceae;g__Delftia;s__Delftia acidovorans	0.409844133	0.041882663	0.652270099	0.92
#N/A	k__Bacteria;p__Proteobacteria;c__Gammaproteobacteria;o__Pasteurellales;f__Pasteurellaceae;g__Mannheimia;s__Mannheimia haemolytica	0.409697313	0.041963322	0.653130903	0.92
unclassified	k__Bacteria;p__Proteobacteria;c__Gammaproteobacteria;o__Pasteurellales;f__Pasteurellaceae;g__Mannheimia;s__Mannheimia haemolytica	0.409697313	0.041963322	0.653130903	0.92
Hypoxanthines	k__Bacteria;p__Proteobacteria;c__Gammaproteobacteria;o__Pasteurellales;f__Pasteurellaceae;g__Mannheimia;s__Mannheimia haemolytica	0.409697313	0.041963322	0.653130903	0.92
unclassified	k__Bacteria;p__Proteobacteria;c__Gammaproteobacteria;o__Pasteurellales;f__Pasteurellaceae;g__Mannheimia;s__Mannheimia haemolytica	0.409697313	0.041963322	0.653130903	0.92
unclassified	k__Bacteria;p__Proteobacteria;c__Gammaproteobacteria;o__Pasteurellales;f__Pasteurellaceae;g__Mannheimia;s__Mannheimia haemolytica	0.409697313	0.041963322	0.653130903	0.92
unclassified	k__Bacteria;p__Proteobacteria;c__Gammaproteobacteria;o__Pasteurellales;f__Pasteurellaceae;g__Mannheimia;s__Mannheimia haemolytica	0.409697313	0.041963322	0.653130903	0.92
unclassified	k__Bacteria;p__Proteobacteria;c__Gammaproteobacteria;o__Enterobacterales;f__Yersiniaceae;g__Yersinia;s__Yersinia pestis	0.409608674	0.042012076	0.653816145	0.88
#N/A	k__Bacteria;p__Proteobacteria;c__Gammaproteobacteria;o__Enterobacterales;f__Yersiniaceae;g__Yersinia;s__Yersinia pestis	0.409499044	0.042072438	0.654497752	0.8
Monohydroxy bile acids, alcohols and derivatives	k__Bacteria;p__Proteobacteria;c__Deltaproteobacteria;o__Desulfovibrionales;f__Desulfovibrionaceae;g__Lawsonia;s__Lawsonia intracellularis	0.40925257	0.042208397	0.655948686	0.64
#N/A	k__Bacteria;p__Proteobacteria;c__Gammaproteobacteria;o__Pasteurellales;f__Pasteurellaceae;g__Mannheimia;s__Mannheimia haemolytica	0.409209122	0.042232399	0.656038235	0.8
Lineolic acids and derivatives	k__Bacteria;p__Proteobacteria;c__Gammaproteobacteria;o__Thiotrichales;f__Francisellaceae;g__Francisella;s__Francisella tularensis;t__Francisella tularensis subsp. holarctica	0.408890104	0.042408967	0.658168894	0.64
Lineolic acids and derivatives	k__Bacteria;p__Proteobacteria;c__Gammaproteobacteria;o__Thiotrichales;f__Francisellaceae;g__Francisella;s__Francisella sp. W12-1067	0.408890104	0.042408967	0.658168894	0.64
#N/A	k__Bacteria;p__Proteobacteria;c__Betaproteobacteria;o__Burkholderiales;f__Comamonadaceae;g__Ottowia;s__Ottowia thiooxydans	0.408732577	0.042496368	0.659109256	0.64
unclassified	k__Bacteria;p__Proteobacteria;c__Betaproteobacteria;o__Burkholderiales;f__Alcaligenaceae;g__Oligella;s__Oligella ureolytica	0.408358194	0.042704659	0.661523683	0.76
unclassified	k__Bacteria;p__Proteobacteria;c__Gammaproteobacteria;o__Pasteurellales;f__Pasteurellaceae;g__Mannheimia;s__Mannheimia haemolytica	0.407966269	0.042923571	0.663586098	0.8
unclassified	k__Bacteria;p__Proteobacteria;c__Gammaproteobacteria;o__Chromatiales;f__Chromatiaceae;g__Rheinheimera;s__Rheinheimera perlucida	0.407883552	0.042969886	0.663666058	0.72
unclassified	k__Bacteria;p__Proteobacteria;c__Gammaproteobacteria;o__Thiotrichales;f__Francisellaceae;g__Francisella;s__Francisella tularensis;t__Francisella tularensis subsp. holarctica	0.407834473	0.042997385	0.663670662	0.76
unclassified	k__Bacteria;p__Proteobacteria;c__Gammaproteobacteria;o__Thiotrichales;f__Francisellaceae;g__Francisella;s__Francisella sp. W12-1067	0.407834473	0.042997385	0.663670662	0.76
unclassified	k__Bacteria;p__Proteobacteria;c__Deltaproteobacteria;o__Desulfovibrionales;f__Desulfovibrionaceae;g__Lawsonia;s__Lawsonia intracellularis	0.407570868	0.04314532	0.665489157	0.84
#N/A	k__Bacteria;p__Proteobacteria;c__Betaproteobacteria;o__Burkholderiales;f__Comamonadaceae;g__Ottowia;s__Ottowia thiooxydans	0.407471998	0.043200909	0.666179405	0.08
Aminobenzenesulfonamides	k__Bacteria;p__Proteobacteria;c__Betaproteobacteria;o__Neisseriales;f__Neisseriaceae;g__Neisseria;s__Neisseria elongata;t__Neisseria elongata subsp. glycolytica	0.407321416	0.043285681	0.666742046	0.04
#N/A	k__Bacteria;p__Proteobacteria;c__Betaproteobacteria;o__Neisseriales;f__Neisseriaceae;g__Neisseria;s__Neisseria elongata;t__Neisseria elongata subsp. glycolytica	0.406271346	0.043880483	0.666742046	0.28
#N/A	k__Bacteria;p__Proteobacteria;c__Deltaproteobacteria;o__Desulfovibrionales;f__Desulfovibrionaceae;g__Lawsonia;s__Lawsonia intracellularis	0.406193447	0.043924864	0.666742046	0.76
#N/A	k__Bacteria;p__Proteobacteria;c__Deltaproteobacteria;o__Desulfovibrionales;f__Desulfovibrionaceae;g__Lawsonia;s__Lawsonia intracellularis	0.406079459	0.043989868	0.666742046	0.76
unclassified	k__Bacteria;p__Proteobacteria;c__Betaproteobacteria;o__Neisseriales;f__Neisseriaceae;g__Neisseria;s__Neisseria lactamica	0.405915729	0.044083371	0.666742046	0.8
unclassified	k__Bacteria;p__Proteobacteria;c__Betaproteobacteria;o__Neisseriales;f__Neisseriaceae;g__Kingella;s__Kingella denitrificans	0.405915729	0.044083371	0.666742046	0.8
unclassified	k__Bacteria;p__Proteobacteria;c__Betaproteobacteria;o__Neisseriales;f__Neisseriaceae;g__Neisseria;s__Neisseria mucosa	0.405851623	0.044120024	0.666742046	0.6
#N/A	k__Bacteria;p__Proteobacteria;c__Deltaproteobacteria;o__Desulfovibrionales;f__Desulfovibrionaceae;g__Lawsonia;s__Lawsonia intracellularis	0.405273692	0.044451538	0.666742046	0.84
Glycosylglycerols	k__Bacteria;p__Proteobacteria;c__Betaproteobacteria;o__Neisseriales;f__Neisseriaceae;g__Neisseria;s__Neisseria mucosa	0.405180532	0.04450516	0.666742046	0.96
unclassified	k__Bacteria;p__Proteobacteria;c__Betaproteobacteria;o__Neisseriales;f__Neisseriaceae;g__Neisseria;s__Neisseria mucosa	0.405180532	0.04450516	0.666742046	0.96
#N/A	k__Bacteria;p__Proteobacteria;c__Betaproteobacteria;o__Neisseriales;f__Neisseriaceae;g__Neisseria;s__Neisseria mucosa	0.405180532	0.04450516	0.666742046	0.96
Diphenylmethanes	k__Bacteria;p__Proteobacteria;c__Betaproteobacteria;o__Neisseriales;f__Neisseriaceae;g__Neisseria;s__Neisseria mucosa	0.405180532	0.04450516	0.666742046	0.96
#N/A	k__Bacteria;p__Proteobacteria;c__Betaproteobacteria;o__Neisseriales;f__Neisseriaceae;g__Neisseria;s__Neisseria mucosa	0.405180532	0.04450516	0.666742046	0.96
unclassified	k__Bacteria;p__Proteobacteria;c__Betaproteobacteria;o__Neisseriales;f__Neisseriaceae;g__Neisseria;s__Neisseria mucosa	0.405180532	0.04450516	0.666742046	0.96
unclassified	k__Bacteria;p__Proteobacteria;c__Betaproteobacteria;o__Neisseriales;f__Neisseriaceae;g__Neisseria;s__Neisseria mucosa	0.405180532	0.04450516	0.666742046	0.96
Benzodioxoles	k__Bacteria;p__Proteobacteria;c__Betaproteobacteria;o__Neisseriales;f__Neisseriaceae;g__Neisseria;s__Neisseria mucosa	0.405180532	0.04450516	0.666742046	0.96
#N/A	k__Bacteria;p__Proteobacteria;c__Betaproteobacteria;o__Neisseriales;f__Neisseriaceae;g__Neisseria;s__Neisseria mucosa	0.405180532	0.04450516	0.666742046	0.96
unclassified	k__Bacteria;p__Proteobacteria;c__Betaproteobacteria;o__Neisseriales;f__Neisseriaceae;g__Neisseria;s__Neisseria mucosa	0.405180532	0.04450516	0.666742046	0.96
#N/A	k__Bacteria;p__Proteobacteria;c__Betaproteobacteria;o__Neisseriales;f__Neisseriaceae;g__Neisseria;s__Neisseria mucosa	0.405180532	0.04450516	0.666742046	0.96
#N/A	k__Bacteria;p__Proteobacteria;c__Betaproteobacteria;o__Neisseriales;f__Neisseriaceae;g__Neisseria;s__Neisseria mucosa	0.405180532	0.04450516	0.666742046	0.96
#N/A	k__Bacteria;p__Proteobacteria;c__Betaproteobacteria;o__Neisseriales;f__Neisseriaceae;g__Neisseria;s__Neisseria mucosa	0.405180532	0.04450516	0.666742046	0.96
unclassified	k__Bacteria;p__Proteobacteria;c__Betaproteobacteria;o__Neisseriales;f__Neisseriaceae;g__Neisseria;s__Neisseria mucosa	0.405180532	0.04450516	0.666742046	0.96
#N/A	k__Bacteria;p__Proteobacteria;c__Betaproteobacteria;o__Neisseriales;f__Neisseriaceae;g__Neisseria;s__Neisseria mucosa	0.405180532	0.04450516	0.666742046	0.96
#N/A	k__Bacteria;p__Proteobacteria;c__Betaproteobacteria;o__Neisseriales;f__Neisseriaceae;g__Neisseria;s__Neisseria mucosa	0.405180532	0.04450516	0.666742046	0.96
unclassified	k__Bacteria;p__Proteobacteria;c__Betaproteobacteria;o__Neisseriales;f__Neisseriaceae;g__Neisseria;s__Neisseria mucosa	0.405180532	0.04450516	0.666742046	0.96
Quinoline carboxylic acids	k__Bacteria;p__Proteobacteria;c__Betaproteobacteria;o__Neisseriales;f__Neisseriaceae;g__Neisseria;s__Neisseria mucosa	0.405180532	0.04450516	0.666742046	0.96
#N/A	k__Bacteria;p__Proteobacteria;c__Deltaproteobacteria;o__Myxococcales;f__Polyangiaceae;g__Chondromyces;s__Chondromyces apiculatus	0.405086475	0.044559349	0.666742046	0.64
unclassified	k__Bacteria;p__Proteobacteria;c__Gammaproteobacteria;o__Thiotrichales;f__Francisellaceae;g__Francisella;s__Francisella tularensis;t__Francisella tularensis subsp. holarctica	0.405086475	0.044559349	0.666742046	0.64
unclassified	k__Bacteria;p__Proteobacteria;c__Gammaproteobacteria;o__Thiotrichales;f__Francisellaceae;g__Francisella;s__Francisella sp. W12-1067	0.405086475	0.044559349	0.666742046	0.64
unclassified	k__Bacteria;p__Proteobacteria;c__Alphaproteobacteria;o__Rhizobiales;f__Phyllobacteriaceae;g__Mesorhizobium;s__Mesorhizobium plurifarium	0.405020981	0.044597114	0.666742046	0.8
unclassified	k__Bacteria;p__Proteobacteria;c__Alphaproteobacteria;o__Rhodobacterales;f__Rhodobacteraceae;g__Thalassobacter;s__Thalassobacter stenotrophicus	0.405020981	0.044597114	0.666742046	0.8
unclassified	k__Bacteria;p__Proteobacteria;c__Alphaproteobacteria;o__Rhizobiales;f__Phyllobacteriaceae;g__Mesorhizobium;s__Mesorhizobium plurifarium	0.405020981	0.044597114	0.666742046	0.8
unclassified	k__Bacteria;p__Proteobacteria;c__Alphaproteobacteria;o__Rhodobacterales;f__Rhodobacteraceae;g__Thalassobacter;s__Thalassobacter stenotrophicus	0.405020981	0.044597114	0.666742046	0.8
#N/A	k__Bacteria;p__Proteobacteria;c__Alphaproteobacteria;o__Rhizobiales;f__Phyllobacteriaceae;g__Mesorhizobium;s__Mesorhizobium plurifarium	0.405020981	0.044597114	0.666742046	0.8
#N/A	k__Bacteria;p__Proteobacteria;c__Alphaproteobacteria;o__Rhodobacterales;f__Rhodobacteraceae;g__Thalassobacter;s__Thalassobacter stenotrophicus	0.405020981	0.044597114	0.666742046	0.8
#N/A	k__Bacteria;p__Proteobacteria;c__Alphaproteobacteria;o__Rhizobiales;f__Phyllobacteriaceae;g__Mesorhizobium;s__Mesorhizobium plurifarium	0.405020981	0.044597114	0.666742046	0.8
#N/A	k__Bacteria;p__Proteobacteria;c__Alphaproteobacteria;o__Rhodobacterales;f__Rhodobacteraceae;g__Thalassobacter;s__Thalassobacter stenotrophicus	0.405020981	0.044597114	0.666742046	0.8
Bile acids, alcohols and derivatives	k__Bacteria;p__Proteobacteria;c__Alphaproteobacteria;o__Rhizobiales;f__Phyllobacteriaceae;g__Mesorhizobium;s__Mesorhizobium plurifarium	0.405020981	0.044597114	0.666742046	0.8
Bile acids, alcohols and derivatives	k__Bacteria;p__Proteobacteria;c__Alphaproteobacteria;o__Rhodobacterales;f__Rhodobacteraceae;g__Thalassobacter;s__Thalassobacter stenotrophicus	0.405020981	0.044597114	0.666742046	0.8
Bile acids, alcohols and derivatives	k__Bacteria;p__Proteobacteria;c__Alphaproteobacteria;o__Rhizobiales;f__Phyllobacteriaceae;g__Mesorhizobium;s__Mesorhizobium plurifarium	0.405020981	0.044597114	0.666742046	0.8
Bile acids, alcohols and derivatives	k__Bacteria;p__Proteobacteria;c__Alphaproteobacteria;o__Rhodobacterales;f__Rhodobacteraceae;g__Thalassobacter;s__Thalassobacter stenotrophicus	0.405020981	0.044597114	0.666742046	0.8
#N/A	k__Bacteria;p__Proteobacteria;c__Alphaproteobacteria;o__Rhizobiales;f__Phyllobacteriaceae;g__Mesorhizobium;s__Mesorhizobium plurifarium	0.405020981	0.044597114	0.666742046	0.8
#N/A	k__Bacteria;p__Proteobacteria;c__Alphaproteobacteria;o__Rhodobacterales;f__Rhodobacteraceae;g__Thalassobacter;s__Thalassobacter stenotrophicus	0.405020981	0.044597114	0.666742046	0.8
unclassified	k__Bacteria;p__Proteobacteria;c__Betaproteobacteria;o__Neisseriales;f__Neisseriaceae;g__Neisseria;s__Neisseria elongata;t__Neisseria elongata subsp. glycolytica	0.404894155	0.044670313	0.667666657	0.28
Dipeptides	k__Bacteria;p__Proteobacteria;c__Gammaproteobacteria;o__Enterobacterales;f__Yersiniaceae;g__Yersinia;s__Yersinia pestis	0.404837502	0.044703042	0.668028466	0.6
#N/A	k__Bacteria;p__Proteobacteria;c__Gammaproteobacteria;o__Thiotrichales;f__Francisellaceae;g__Francisella;s__Francisella tularensis;t__Francisella tularensis subsp. holarctica	0.40483553	0.044704181	0.668028466	0.44
#N/A	k__Bacteria;p__Proteobacteria;c__Gammaproteobacteria;o__Thiotrichales;f__Francisellaceae;g__Francisella;s__Francisella sp. W12-1067	0.40483553	0.044704181	0.668028466	0.44
#N/A	k__Bacteria;p__Proteobacteria;c__Betaproteobacteria;o__Rhodocyclales;f__Rhodocyclaceae;g__;s__Rhodocyclaceae bacterium Paddy-1	0.404685129	0.044791163	0.669123878	0.6
#N/A	k__Bacteria;p__Proteobacteria;c__Gammaproteobacteria;o__Pasteurellales;f__Pasteurellaceae;g__Mannheimia;s__Mannheimia haemolytica	0.404577856	0.044853282	0.66965051	0.64
Nicotinamides	k__Bacteria;p__Proteobacteria;c__Gammaproteobacteria;o__Pasteurellales;f__Pasteurellaceae;g__Mannheimia;s__Mannheimia haemolytica	0.404248428	0.045044472	0.671580522	0.68
Carboximidic acids	k__Bacteria;p__Proteobacteria;c__Gammaproteobacteria;o__Pasteurellales;f__Pasteurellaceae;g__Mannheimia;s__Mannheimia haemolytica	0.404191189	0.045077758	0.67194095	0.88
Hydroxyindoles	k__Bacteria;p__Proteobacteria;c__Betaproteobacteria;o__Neisseriales;f__Neisseriaceae;g__Neisseria;s__Neisseria elongata;t__Neisseria elongata subsp. glycolytica	0.403966554	0.045208572	0.672634289	0.8
#N/A	k__Bacteria;p__Proteobacteria;c__Deltaproteobacteria;o__Desulfovibrionales;f__Desulfovibrionaceae;g__Lawsonia;s__Lawsonia intracellularis	0.403812824	0.045298267	0.672634289	0.92
#N/A	k__Bacteria;p__Proteobacteria;c__Deltaproteobacteria;o__Desulfovibrionales;f__Desulfovibrionaceae;g__Lawsonia;s__Lawsonia intracellularis	0.403699505	0.045364474	0.672634289	0.92
unclassified	k__Bacteria;p__Proteobacteria;c__Betaproteobacteria;o__Neisseriales;f__Neisseriaceae;g__Neisseria;s__Neisseria lactamica	0.403579666	0.045434572	0.672634289	0.76
unclassified	k__Bacteria;p__Proteobacteria;c__Betaproteobacteria;o__Neisseriales;f__Neisseriaceae;g__Kingella;s__Kingella denitrificans	0.403579666	0.045434572	0.672634289	0.76
unclassified	k__Bacteria;p__Proteobacteria;c__Gammaproteobacteria;o__Pasteurellales;f__Pasteurellaceae;g__Mannheimia;s__Mannheimia haemolytica	0.403422034	0.045526907	0.672634289	0.88
Hydroxyindoles	k__Bacteria;p__Proteobacteria;c__Betaproteobacteria;o__Rhodocyclales;f__Rhodocyclaceae;g__;s__Rhodocyclaceae bacterium Paddy-1	0.402990787	0.045780269	0.672634289	0.8
unclassified	k__Bacteria;p__Proteobacteria;c__Betaproteobacteria;o__Rhodocyclales;f__Rhodocyclaceae;g__;s__Rhodocyclaceae bacterium Paddy-1	0.402990787	0.045780269	0.672634289	0.8
Straight chain fatty acids	k__Bacteria;p__Proteobacteria;c__Betaproteobacteria;o__Burkholderiales;f__Comamonadaceae;g__Ottowia;s__Ottowia thiooxydans	0.40276615	0.045912683	0.672634289	0.4
#N/A	k__Bacteria;p__Proteobacteria;c__Gammaproteobacteria;o__Chromatiales;f__Chromatiaceae;g__Rheinheimera;s__Rheinheimera perlucida	0.402260069	0.0462121	0.672634289	0.8
Bile acids, alcohols and derivatives	k__Bacteria;p__Proteobacteria;c__Gammaproteobacteria;o__Chromatiales;f__Chromatiaceae;g__Rheinheimera;s__Rheinheimera perlucida	0.402260069	0.0462121	0.672634289	0.8
unclassified	k__Bacteria;p__Proteobacteria;c__Gammaproteobacteria;o__Chromatiales;f__Chromatiaceae;g__Rheinheimera;s__Rheinheimera perlucida	0.402260069	0.0462121	0.672634289	0.8
Steroid esters	k__Bacteria;p__Proteobacteria;c__Betaproteobacteria;o__Burkholderiales;f__Alcaligenaceae;g__Oligella;s__Oligella ureolytica	0.401357222	0.046750064	0.672634289	0.56
unclassified	k__Bacteria;p__Proteobacteria;c__Betaproteobacteria;o__Neisseriales;f__Neisseriaceae;g__Neisseria;s__Neisseria mucosa	0.401278508	0.046797198	0.672634289	0.28
Oligopeptides	k__Bacteria;p__Proteobacteria;c__Deltaproteobacteria;o__Desulfovibrionales;f__Desulfovibrionaceae;g__Lawsonia;s__Lawsonia intracellularis	0.400850871	0.047053918	0.672634289	0.92
#N/A	k__Bacteria;p__Proteobacteria;c__Betaproteobacteria;o__Burkholderiales;f__Comamonadaceae;g__Ottowia;s__Ottowia thiooxydans	0.400786375	0.047092732	0.672634289	0.36
#N/A	k__Bacteria;p__Proteobacteria;c__Betaproteobacteria;o__Neisseriales;f__Neisseriaceae;g__Neisseria;s__Neisseria mucosa	0.400724493	0.047129997	0.672634289	0.64
Tetrahydroxy bile acids, alcohols and derivatives	k__Bacteria;p__Proteobacteria;c__Gammaproteobacteria;o__Thiotrichales;f__Francisellaceae;g__Francisella;s__Francisella tularensis;t__Francisella tularensis subsp. holarctica	0.400237353	0.047424156	0.672634289	0.4
Tetrahydroxy bile acids, alcohols and derivatives	k__Bacteria;p__Proteobacteria;c__Gammaproteobacteria;o__Thiotrichales;f__Francisellaceae;g__Francisella;s__Francisella sp. W12-1067	0.400237353	0.047424156	0.672634289	0.4
Trihydroxy bile acids, alcohols and derivatives	k__Bacteria;p__Proteobacteria;c__Gammaproteobacteria;o__Thiotrichales;f__Francisellaceae;g__Francisella;s__Francisella tularensis;t__Francisella tularensis subsp. holarctica	0.399936291	0.04760667	0.672634289	0.36
Trihydroxy bile acids, alcohols and derivatives	k__Bacteria;p__Proteobacteria;c__Gammaproteobacteria;o__Thiotrichales;f__Francisellaceae;g__Francisella;s__Francisella sp. W12-1067	0.399936291	0.04760667	0.672634289	0.36
unclassified	k__Bacteria;p__Proteobacteria;c__Gammaproteobacteria;o__Chromatiales;f__Chromatiaceae;g__Rheinheimera;s__Rheinheimera perlucida	0.399652627	0.04777914	0.672634289	0.92
unclassified	k__Bacteria;p__Proteobacteria;c__Gammaproteobacteria;o__Chromatiales;f__Chromatiaceae;g__Rheinheimera;s__Rheinheimera perlucida	0.399652627	0.04777914	0.672634289	0.92
unclassified	k__Bacteria;p__Proteobacteria;c__Gammaproteobacteria;o__Chromatiales;f__Chromatiaceae;g__Rheinheimera;s__Rheinheimera perlucida	0.399652627	0.04777914	0.672634289	0.92
unclassified	k__Bacteria;p__Proteobacteria;c__Gammaproteobacteria;o__Chromatiales;f__Chromatiaceae;g__Rheinheimera;s__Rheinheimera perlucida	0.399652627	0.04777914	0.672634289	0.92
unclassified	k__Bacteria;p__Proteobacteria;c__Gammaproteobacteria;o__Chromatiales;f__Chromatiaceae;g__Rheinheimera;s__Rheinheimera perlucida	0.399652627	0.04777914	0.672634289	0.92
#N/A	k__Bacteria;p__Proteobacteria;c__Deltaproteobacteria;o__Desulfovibrionales;f__Desulfovibrionaceae;g__Lawsonia;s__Lawsonia intracellularis	0.399565012	0.047832509	0.672634289	0.84
Glycinated bile acids and derivatives	k__Bacteria;p__Proteobacteria;c__Deltaproteobacteria;o__Myxococcales;f__Polyangiaceae;g__Chondromyces;s__Chondromyces apiculatus	0.399411509	0.047926126	0.672634289	0.88
Glycinated bile acids and derivatives	k__Bacteria;p__Proteobacteria;c__Deltaproteobacteria;o__Myxococcales;f__Polyangiaceae;g__Chondromyces;s__Chondromyces apiculatus	0.399411509	0.047926126	0.672634289	0.88
#N/A	k__Bacteria;p__Proteobacteria;c__Gammaproteobacteria;o__Thiotrichales;f__Francisellaceae;g__Francisella;s__Francisella tularensis;t__Francisella tularensis subsp. holarctica	0.399411509	0.047926126	0.672634289	0.88
#N/A	k__Bacteria;p__Proteobacteria;c__Deltaproteobacteria;o__Myxococcales;f__Polyangiaceae;g__Chondromyces;s__Chondromyces apiculatus	0.399411509	0.047926126	0.672634289	0.88
#N/A	k__Bacteria;p__Proteobacteria;c__Gammaproteobacteria;o__Thiotrichales;f__Francisellaceae;g__Francisella;s__Francisella sp. W12-1067	0.399411509	0.047926126	0.672634289	0.88
unclassified	k__Bacteria;p__Proteobacteria;c__Gammaproteobacteria;o__Thiotrichales;f__Francisellaceae;g__Francisella;s__Francisella tularensis;t__Francisella tularensis subsp. holarctica	0.399411509	0.047926126	0.672634289	0.88
unclassified	k__Bacteria;p__Proteobacteria;c__Deltaproteobacteria;o__Myxococcales;f__Polyangiaceae;g__Chondromyces;s__Chondromyces apiculatus	0.399411509	0.047926126	0.672634289	0.88
unclassified	k__Bacteria;p__Proteobacteria;c__Gammaproteobacteria;o__Thiotrichales;f__Francisellaceae;g__Francisella;s__Francisella sp. W12-1067	0.399411509	0.047926126	0.672634289	0.88
unclassified	k__Bacteria;p__Proteobacteria;c__Deltaproteobacteria;o__Myxococcales;f__Polyangiaceae;g__Chondromyces;s__Chondromyces apiculatus	0.399411509	0.047926126	0.672634289	0.88
#N/A	k__Bacteria;p__Proteobacteria;c__Deltaproteobacteria;o__Myxococcales;f__Polyangiaceae;g__Chondromyces;s__Chondromyces apiculatus	0.399411509	0.047926126	0.672634289	0.88
#N/A	k__Bacteria;p__Proteobacteria;c__Betaproteobacteria;o__Neisseriales;f__Neisseriaceae;g__Neisseria;s__Neisseria lactamica	0.399411509	0.047926126	0.672634289	0.92
#N/A	k__Bacteria;p__Proteobacteria;c__Betaproteobacteria;o__Neisseriales;f__Neisseriaceae;g__Neisseria;s__Neisseria elongata;t__Neisseria elongata subsp. glycolytica	0.399411509	0.047926126	0.672634289	0.92
#N/A	k__Bacteria;p__Proteobacteria;c__Betaproteobacteria;o__Neisseriales;f__Neisseriaceae;g__Kingella;s__Kingella denitrificans	0.399411509	0.047926126	0.672634289	0.92
unclassified	k__Bacteria;p__Proteobacteria;c__Gammaproteobacteria;o__Thiotrichales;f__Francisellaceae;g__Francisella;s__Francisella tularensis;t__Francisella tularensis subsp. holarctica	0.399411509	0.047926126	0.672634289	0.88
unclassified	k__Bacteria;p__Proteobacteria;c__Deltaproteobacteria;o__Myxococcales;f__Polyangiaceae;g__Chondromyces;s__Chondromyces apiculatus	0.399411509	0.047926126	0.672634289	0.88
unclassified	k__Bacteria;p__Proteobacteria;c__Gammaproteobacteria;o__Thiotrichales;f__Francisellaceae;g__Francisella;s__Francisella sp. W12-1067	0.399411509	0.047926126	0.672634289	0.88
unclassified	k__Bacteria;p__Proteobacteria;c__Gammaproteobacteria;o__Thiotrichales;f__Francisellaceae;g__Francisella;s__Francisella tularensis;t__Francisella tularensis subsp. holarctica	0.399411509	0.047926126	0.672634289	0.88
unclassified	k__Bacteria;p__Proteobacteria;c__Deltaproteobacteria;o__Myxococcales;f__Polyangiaceae;g__Chondromyces;s__Chondromyces apiculatus	0.399411509	0.047926126	0.672634289	0.88
unclassified	k__Bacteria;p__Proteobacteria;c__Gammaproteobacteria;o__Thiotrichales;f__Francisellaceae;g__Francisella;s__Francisella sp. W12-1067	0.399411509	0.047926126	0.672634289	0.88
unclassified	k__Bacteria;p__Proteobacteria;c__Betaproteobacteria;o__Neisseriales;f__Neisseriaceae;g__Neisseria;s__Neisseria lactamica	0.399411509	0.047926126	0.672634289	0.92
unclassified	k__Bacteria;p__Proteobacteria;c__Betaproteobacteria;o__Neisseriales;f__Neisseriaceae;g__Neisseria;s__Neisseria elongata;t__Neisseria elongata subsp. glycolytica	0.399411509	0.047926126	0.672634289	0.92
unclassified	k__Bacteria;p__Proteobacteria;c__Betaproteobacteria;o__Neisseriales;f__Neisseriaceae;g__Kingella;s__Kingella denitrificans	0.399411509	0.047926126	0.672634289	0.92
Alpha amino acids	k__Bacteria;p__Proteobacteria;c__Gammaproteobacteria;o__Thiotrichales;f__Francisellaceae;g__Francisella;s__Francisella tularensis;t__Francisella tularensis subsp. holarctica	0.399411509	0.047926126	0.672634289	0.88
Alpha amino acids	k__Bacteria;p__Proteobacteria;c__Deltaproteobacteria;o__Myxococcales;f__Polyangiaceae;g__Chondromyces;s__Chondromyces apiculatus	0.399411509	0.047926126	0.672634289	0.88
Alpha amino acids	k__Bacteria;p__Proteobacteria;c__Gammaproteobacteria;o__Thiotrichales;f__Francisellaceae;g__Francisella;s__Francisella sp. W12-1067	0.399411509	0.047926126	0.672634289	0.88
Monohydroxy bile acids, alcohols and derivatives	k__Bacteria;p__Proteobacteria;c__Gammaproteobacteria;o__Thiotrichales;f__Francisellaceae;g__Francisella;s__Francisella tularensis;t__Francisella tularensis subsp. holarctica	0.399411509	0.047926126	0.672634289	0.88
Monohydroxy bile acids, alcohols and derivatives	k__Bacteria;p__Proteobacteria;c__Deltaproteobacteria;o__Myxococcales;f__Polyangiaceae;g__Chondromyces;s__Chondromyces apiculatus	0.399411509	0.047926126	0.672634289	0.88
Monohydroxy bile acids, alcohols and derivatives	k__Bacteria;p__Proteobacteria;c__Gammaproteobacteria;o__Thiotrichales;f__Francisellaceae;g__Francisella;s__Francisella sp. W12-1067	0.399411509	0.047926126	0.672634289	0.88
unclassified	k__Bacteria;p__Proteobacteria;c__Gammaproteobacteria;o__Thiotrichales;f__Francisellaceae;g__Francisella;s__Francisella tularensis;t__Francisella tularensis subsp. holarctica	0.399411509	0.047926126	0.672634289	0.88
unclassified	k__Bacteria;p__Proteobacteria;c__Deltaproteobacteria;o__Myxococcales;f__Polyangiaceae;g__Chondromyces;s__Chondromyces apiculatus	0.399411509	0.047926126	0.672634289	0.88
unclassified	k__Bacteria;p__Proteobacteria;c__Gammaproteobacteria;o__Thiotrichales;f__Francisellaceae;g__Francisella;s__Francisella sp. W12-1067	0.399411509	0.047926126	0.672634289	0.88
Hydroquinolones	k__Bacteria;p__Proteobacteria;c__Betaproteobacteria;o__Neisseriales;f__Neisseriaceae;g__Neisseria;s__Neisseria lactamica	0.399411509	0.047926126	0.672634289	0.92
Hydroquinolones	k__Bacteria;p__Proteobacteria;c__Betaproteobacteria;o__Neisseriales;f__Neisseriaceae;g__Neisseria;s__Neisseria elongata;t__Neisseria elongata subsp. glycolytica	0.399411509	0.047926126	0.672634289	0.92
Hydroquinolones	k__Bacteria;p__Proteobacteria;c__Betaproteobacteria;o__Neisseriales;f__Neisseriaceae;g__Kingella;s__Kingella denitrificans	0.399411509	0.047926126	0.672634289	0.92
#N/A	k__Bacteria;p__Proteobacteria;c__Betaproteobacteria;o__Neisseriales;f__Neisseriaceae;g__Neisseria;s__Neisseria lactamica	0.399411509	0.047926126	0.672634289	0.92
#N/A	k__Bacteria;p__Proteobacteria;c__Betaproteobacteria;o__Neisseriales;f__Neisseriaceae;g__Neisseria;s__Neisseria elongata;t__Neisseria elongata subsp. glycolytica	0.399411509	0.047926126	0.672634289	0.92
#N/A	k__Bacteria;p__Proteobacteria;c__Betaproteobacteria;o__Neisseriales;f__Neisseriaceae;g__Kingella;s__Kingella denitrificans	0.399411509	0.047926126	0.672634289	0.92
Monohydroxy bile acids, alcohols and derivatives	k__Bacteria;p__Proteobacteria;c__Gammaproteobacteria;o__Thiotrichales;f__Francisellaceae;g__Francisella;s__Francisella tularensis;t__Francisella tularensis subsp. holarctica	0.399411509	0.047926126	0.672634289	0.88
Monohydroxy bile acids, alcohols and derivatives	k__Bacteria;p__Proteobacteria;c__Deltaproteobacteria;o__Myxococcales;f__Polyangiaceae;g__Chondromyces;s__Chondromyces apiculatus	0.399411509	0.047926126	0.672634289	0.88
Monohydroxy bile acids, alcohols and derivatives	k__Bacteria;p__Proteobacteria;c__Gammaproteobacteria;o__Thiotrichales;f__Francisellaceae;g__Francisella;s__Francisella sp. W12-1067	0.399411509	0.047926126	0.672634289	0.88
#N/A	k__Bacteria;p__Proteobacteria;c__Gammaproteobacteria;o__Thiotrichales;f__Francisellaceae;g__Francisella;s__Francisella tularensis;t__Francisella tularensis subsp. holarctica	0.399411509	0.047926126	0.672634289	0.88
#N/A	k__Bacteria;p__Proteobacteria;c__Deltaproteobacteria;o__Myxococcales;f__Polyangiaceae;g__Chondromyces;s__Chondromyces apiculatus	0.399411509	0.047926126	0.672634289	0.88
#N/A	k__Bacteria;p__Proteobacteria;c__Gammaproteobacteria;o__Thiotrichales;f__Francisellaceae;g__Francisella;s__Francisella sp. W12-1067	0.399411509	0.047926126	0.672634289	0.88
Xanthines	k__Bacteria;p__Proteobacteria;c__Betaproteobacteria;o__Neisseriales;f__Neisseriaceae;g__Neisseria;s__Neisseria lactamica	0.399411509	0.047926126	0.672634289	0.92
Xanthines	k__Bacteria;p__Proteobacteria;c__Betaproteobacteria;o__Neisseriales;f__Neisseriaceae;g__Neisseria;s__Neisseria elongata;t__Neisseria elongata subsp. glycolytica	0.399411509	0.047926126	0.672634289	0.92
Xanthines	k__Bacteria;p__Proteobacteria;c__Betaproteobacteria;o__Neisseriales;f__Neisseriaceae;g__Kingella;s__Kingella denitrificans	0.399411509	0.047926126	0.672634289	0.92
Hypoxanthines	k__Bacteria;p__Proteobacteria;c__Betaproteobacteria;o__Neisseriales;f__Neisseriaceae;g__Neisseria;s__Neisseria lactamica	0.399411509	0.047926126	0.672634289	0.92
Hypoxanthines	k__Bacteria;p__Proteobacteria;c__Betaproteobacteria;o__Neisseriales;f__Neisseriaceae;g__Neisseria;s__Neisseria elongata;t__Neisseria elongata subsp. glycolytica	0.399411509	0.047926126	0.672634289	0.92
Hypoxanthines	k__Bacteria;p__Proteobacteria;c__Betaproteobacteria;o__Neisseriales;f__Neisseriaceae;g__Kingella;s__Kingella denitrificans	0.399411509	0.047926126	0.672634289	0.92
unclassified	k__Bacteria;p__Proteobacteria;c__Betaproteobacteria;o__Neisseriales;f__Neisseriaceae;g__Neisseria;s__Neisseria lactamica	0.399411509	0.047926126	0.672634289	0.92
unclassified	k__Bacteria;p__Proteobacteria;c__Betaproteobacteria;o__Neisseriales;f__Neisseriaceae;g__Neisseria;s__Neisseria elongata;t__Neisseria elongata subsp. glycolytica	0.399411509	0.047926126	0.672634289	0.92
unclassified	k__Bacteria;p__Proteobacteria;c__Betaproteobacteria;o__Neisseriales;f__Neisseriaceae;g__Kingella;s__Kingella denitrificans	0.399411509	0.047926126	0.672634289	0.92
#N/A	k__Bacteria;p__Proteobacteria;c__Betaproteobacteria;o__Neisseriales;f__Neisseriaceae;g__Neisseria;s__Neisseria lactamica	0.399411509	0.047926126	0.672634289	0.92
#N/A	k__Bacteria;p__Proteobacteria;c__Betaproteobacteria;o__Neisseriales;f__Neisseriaceae;g__Neisseria;s__Neisseria elongata;t__Neisseria elongata subsp. glycolytica	0.399411509	0.047926126	0.672634289	0.92
#N/A	k__Bacteria;p__Proteobacteria;c__Betaproteobacteria;o__Neisseriales;f__Neisseriaceae;g__Kingella;s__Kingella denitrificans	0.399411509	0.047926126	0.672634289	0.92
unclassified	k__Bacteria;p__Proteobacteria;c__Betaproteobacteria;o__Neisseriales;f__Neisseriaceae;g__Neisseria;s__Neisseria lactamica	0.399411509	0.047926126	0.672634289	0.92
unclassified	k__Bacteria;p__Proteobacteria;c__Betaproteobacteria;o__Neisseriales;f__Neisseriaceae;g__Neisseria;s__Neisseria elongata;t__Neisseria elongata subsp. glycolytica	0.399411509	0.047926126	0.672634289	0.92
unclassified	k__Bacteria;p__Proteobacteria;c__Betaproteobacteria;o__Neisseriales;f__Neisseriaceae;g__Kingella;s__Kingella denitrificans	0.399411509	0.047926126	0.672634289	0.92
#N/A	k__Bacteria;p__Proteobacteria;c__Betaproteobacteria;o__Neisseriales;f__Neisseriaceae;g__Neisseria;s__Neisseria lactamica	0.399411509	0.047926126	0.672634289	0.92
#N/A	k__Bacteria;p__Proteobacteria;c__Betaproteobacteria;o__Neisseriales;f__Neisseriaceae;g__Neisseria;s__Neisseria elongata;t__Neisseria elongata subsp. glycolytica	0.399411509	0.047926126	0.672634289	0.92
#N/A	k__Bacteria;p__Proteobacteria;c__Betaproteobacteria;o__Neisseriales;f__Neisseriaceae;g__Kingella;s__Kingella denitrificans	0.399411509	0.047926126	0.672634289	0.92
unclassified	k__Bacteria;p__Proteobacteria;c__Betaproteobacteria;o__Neisseriales;f__Neisseriaceae;g__Neisseria;s__Neisseria lactamica	0.399411509	0.047926126	0.672634289	0.92
unclassified	k__Bacteria;p__Proteobacteria;c__Betaproteobacteria;o__Neisseriales;f__Neisseriaceae;g__Neisseria;s__Neisseria elongata;t__Neisseria elongata subsp. glycolytica	0.399411509	0.047926126	0.672634289	0.92
unclassified	k__Bacteria;p__Proteobacteria;c__Betaproteobacteria;o__Neisseriales;f__Neisseriaceae;g__Kingella;s__Kingella denitrificans	0.399411509	0.047926126	0.672634289	0.92
#N/A	k__Bacteria;p__Proteobacteria;c__Betaproteobacteria;o__Neisseriales;f__Neisseriaceae;g__Neisseria;s__Neisseria elongata;t__Neisseria elongata subsp. glycolytica	0.399411509	0.047926126	0.672634289	0.92
unclassified	k__Bacteria;p__Proteobacteria;c__Alphaproteobacteria;o__Rhizobiales;f__Phyllobacteriaceae;g__Mesorhizobium;s__Mesorhizobium plurifarium	0.398996382	0.048180019	0.672634289	0.84
unclassified	k__Bacteria;p__Proteobacteria;c__Alphaproteobacteria;o__Rhodobacterales;f__Rhodobacteraceae;g__Thalassobacter;s__Thalassobacter stenotrophicus	0.398996382	0.048180019	0.672634289	0.84
#N/A	k__Bacteria;p__Proteobacteria;c__Alphaproteobacteria;o__Rhizobiales;f__Phyllobacteriaceae;g__Mesorhizobium;s__Mesorhizobium plurifarium	0.398996382	0.048180019	0.672634289	0.84
#N/A	k__Bacteria;p__Proteobacteria;c__Alphaproteobacteria;o__Rhodobacterales;f__Rhodobacteraceae;g__Thalassobacter;s__Thalassobacter stenotrophicus	0.398996382	0.048180019	0.672634289	0.84
#N/A	k__Bacteria;p__Proteobacteria;c__Alphaproteobacteria;o__Rhizobiales;f__Phyllobacteriaceae;g__Mesorhizobium;s__Mesorhizobium plurifarium	0.398996382	0.048180019	0.672634289	0.84
#N/A	k__Bacteria;p__Proteobacteria;c__Alphaproteobacteria;o__Rhodobacterales;f__Rhodobacteraceae;g__Thalassobacter;s__Thalassobacter stenotrophicus	0.398996382	0.048180019	0.672634289	0.84
#N/A	k__Bacteria;p__Proteobacteria;c__Alphaproteobacteria;o__Rhizobiales;f__Phyllobacteriaceae;g__Mesorhizobium;s__Mesorhizobium plurifarium	0.398996382	0.048180019	0.672634289	0.84
#N/A	k__Bacteria;p__Proteobacteria;c__Alphaproteobacteria;o__Rhodobacterales;f__Rhodobacteraceae;g__Thalassobacter;s__Thalassobacter stenotrophicus	0.398996382	0.048180019	0.672634289	0.84
unclassified	k__Bacteria;p__Proteobacteria;c__Alphaproteobacteria;o__Rhizobiales;f__Phyllobacteriaceae;g__Mesorhizobium;s__Mesorhizobium plurifarium	0.398996382	0.048180019	0.672634289	0.84
unclassified	k__Bacteria;p__Proteobacteria;c__Alphaproteobacteria;o__Rhodobacterales;f__Rhodobacteraceae;g__Thalassobacter;s__Thalassobacter stenotrophicus	0.398996382	0.048180019	0.672634289	0.84
unclassified	k__Bacteria;p__Proteobacteria;c__Alphaproteobacteria;o__Rhizobiales;f__Phyllobacteriaceae;g__Mesorhizobium;s__Mesorhizobium plurifarium	0.398996382	0.048180019	0.672634289	0.84
unclassified	k__Bacteria;p__Proteobacteria;c__Alphaproteobacteria;o__Rhodobacterales;f__Rhodobacteraceae;g__Thalassobacter;s__Thalassobacter stenotrophicus	0.398996382	0.048180019	0.672634289	0.84
Triterpenoids	k__Bacteria;p__Proteobacteria;c__Alphaproteobacteria;o__Rhizobiales;f__Phyllobacteriaceae;g__Mesorhizobium;s__Mesorhizobium plurifarium	0.398996382	0.048180019	0.672634289	0.84
Triterpenoids	k__Bacteria;p__Proteobacteria;c__Alphaproteobacteria;o__Rhodobacterales;f__Rhodobacteraceae;g__Thalassobacter;s__Thalassobacter stenotrophicus	0.398996382	0.048180019	0.672634289	0.84
Dihydroxy bile acids, alcohols and derivatives	k__Bacteria;p__Proteobacteria;c__Alphaproteobacteria;o__Rhizobiales;f__Phyllobacteriaceae;g__Mesorhizobium;s__Mesorhizobium plurifarium	0.398996382	0.048180019	0.672634289	0.84
Dihydroxy bile acids, alcohols and derivatives	k__Bacteria;p__Proteobacteria;c__Alphaproteobacteria;o__Rhodobacterales;f__Rhodobacteraceae;g__Thalassobacter;s__Thalassobacter stenotrophicus	0.398996382	0.048180019	0.672634289	0.84
#N/A	k__Bacteria;p__Proteobacteria;c__Alphaproteobacteria;o__Rhizobiales;f__Phyllobacteriaceae;g__Mesorhizobium;s__Mesorhizobium plurifarium	0.398996382	0.048180019	0.672634289	0.84
#N/A	k__Bacteria;p__Proteobacteria;c__Alphaproteobacteria;o__Rhodobacterales;f__Rhodobacteraceae;g__Thalassobacter;s__Thalassobacter stenotrophicus	0.398996382	0.048180019	0.672634289	0.84
unclassified	k__Bacteria;p__Proteobacteria;c__Betaproteobacteria;o__Neisseriales;f__Neisseriaceae;g__Neisseria;s__Neisseria mucosa	0.398824137	0.048285674	0.673682171	0.56
Glycinated bile acids and derivatives	k__Bacteria;p__Proteobacteria;c__Gammaproteobacteria;o__Pasteurellales;f__Pasteurellaceae;g__Mannheimia;s__Mannheimia haemolytica	0.39875248	0.048329681	0.674128218	0.76
unclassified	k__Bacteria;p__Proteobacteria;c__Betaproteobacteria;o__Rhodocyclales;f__Rhodocyclaceae;g__;s__Rhodocyclaceae bacterium Paddy-1	0.3987106	0.048355416	0.674402152	0.72
unclassified	k__Bacteria;p__Proteobacteria;c__Deltaproteobacteria;o__Myxococcales;f__Polyangiaceae;g__Chondromyces;s__Chondromyces apiculatus	0.398540718	0.048459917	0.675222412	0.68
Tetrahydroxy bile acids, alcohols and derivatives	k__Bacteria;p__Proteobacteria;c__Betaproteobacteria;o__Burkholderiales;f__Alcaligenaceae;g__Oligella;s__Oligella ureolytica	0.398349215	0.04857793	0.676294863	0.36
#N/A	k__Bacteria;p__Proteobacteria;c__Betaproteobacteria;o__Burkholderiales;f__Alcaligenaceae;g__Oligella;s__Oligella ureolytica	0.398333779	0.048587452	0.676393379	0.8
Tetrahydroxy bile acids, alcohols and derivatives	k__Bacteria;p__Proteobacteria;c__Gammaproteobacteria;o__Thiotrichales;f__Francisellaceae;g__Francisella;s__Francisella tularensis;t__Francisella tularensis subsp. holarctica	0.398262917	0.048631184	0.676704148	0.36
Tetrahydroxy bile acids, alcohols and derivatives	k__Bacteria;p__Proteobacteria;c__Gammaproteobacteria;o__Thiotrichales;f__Francisellaceae;g__Francisella;s__Francisella sp. W12-1067	0.398262917	0.048631184	0.676704148	0.36
Triterpenoids	k__Bacteria;p__Proteobacteria;c__Betaproteobacteria;o__Burkholderiales;f__Alcaligenaceae;g__Oligella;s__Oligella ureolytica	0.397968506	0.048813208	0.677779265	0.84
unclassified	k__Bacteria;p__Proteobacteria;c__Gammaproteobacteria;o__Pasteurellales;f__Pasteurellaceae;g__Haemophilus;s__Haemophilus sputorum	0.396604197	0.049663684	0.686538021	0.68
unclassified	k__Bacteria;p__Proteobacteria;c__Deltaproteobacteria;o__Desulfovibrionales;f__Desulfovibrionaceae;g__Lawsonia;s__Lawsonia intracellularis	0.396566408	0.049687405	0.686582828	0.88
unclassified	k__Bacteria;p__Proteobacteria;c__Gammaproteobacteria;o__Pasteurellales;f__Pasteurellaceae;g__Haemophilus;s__Haemophilus sputorum	0.396312465	0.049847037	0.686978551	0.76
#N/A	k__Bacteria;p__Proteobacteria;c__Betaproteobacteria;o__Neisseriales;f__Neisseriaceae;g__Neisseria;s__Neisseria elongata;t__Neisseria elongata subsp. glycolytica	0.396169853	0.049936862	0.686978551	0.8
unclassified	k__Bacteria;p__Proteobacteria;c__Gammaproteobacteria;o__Chromatiales;f__Chromatiaceae;g__Rheinheimera;s__Rheinheimera perlucida	-0.396148372	0.049950402	0.686978551	0.4
#N/A	k__Bacteria;p__Proteobacteria;c__Gammaproteobacteria;o__Chromatiales;f__Chromatiaceae;g__Rheinheimera;s__Rheinheimera perlucida	-0.396148372	0.049950402	0.686978551	0.4
Fatty aldehydes	k__Bacteria;p__Proteobacteria;c__Betaproteobacteria;o__Neisseriales;f__Neisseriaceae;g__Neisseria;s__Neisseria elongata;t__Neisseria elongata subsp. glycolytica	-0.396164063	0.049940511	0.686978551	0.16
unclassified	k__Bacteria;p__Proteobacteria;c__Deltaproteobacteria;o__Desulfovibrionales;f__Desulfovibrionaceae;g__Lawsonia;s__Lawsonia intracellularis	-0.396424378	0.049776638	0.686978551	0.48
#N/A	k__Bacteria;p__Proteobacteria;c__Betaproteobacteria;o__Burkholderiales;f__Alcaligenaceae;g__Oligella;s__Oligella ureolytica	-0.396454392	0.049757771	0.686978551	0.16
unclassified	k__Bacteria;p__Proteobacteria;c__Betaproteobacteria;o__Rhodocyclales;f__Rhodocyclaceae;g__;s__Rhodocyclaceae bacterium Paddy-1	-0.396867988	0.049498346	0.684913603	0.4
#N/A	k__Bacteria;p__Proteobacteria;c__Betaproteobacteria;o__Rhodocyclales;f__Rhodocyclaceae;g__;s__Rhodocyclaceae bacterium Paddy-1	-0.396867988	0.049498346	0.684913603	0.4
Oligopeptides	k__Bacteria;p__Proteobacteria;c__Gammaproteobacteria;o__Pasteurellales;f__Pasteurellaceae;g__Haemophilus;s__Haemophilus sputorum	-0.397339182	0.049204085	0.681888699	0.76
Aminobenzenesulfonamides	k__Bacteria;p__Proteobacteria;c__Betaproteobacteria;o__Burkholderiales;f__Alcaligenaceae;g__Oligella;s__Oligella ureolytica	-0.398590761	0.048429116	0.675098111	0.24
unclassified	k__Bacteria;p__Proteobacteria;c__Betaproteobacteria;o__Neisseriales;f__Neisseriaceae;g__Neisseria;s__Neisseria mucosa	-0.399443034	0.047906889	0.672634289	0.12
unclassified	k__Bacteria;p__Proteobacteria;c__Betaproteobacteria;o__Burkholderiales;f__Alcaligenaceae;g__Oligella;s__Oligella ureolytica	-0.399821159	0.047676612	0.672634289	0.52
N-alkylindoles	k__Bacteria;p__Proteobacteria;c__Betaproteobacteria;o__Burkholderiales;f__Alcaligenaceae;g__Oligella;s__Oligella ureolytica	-0.401155133	0.04687115	0.672634289	0.76
Phenylmethylamines	k__Bacteria;p__Proteobacteria;c__Betaproteobacteria;o__Burkholderiales;f__Alcaligenaceae;g__Oligella;s__Oligella ureolytica	-0.401155133	0.04687115	0.672634289	0.76
#N/A	k__Bacteria;p__Proteobacteria;c__Betaproteobacteria;o__Burkholderiales;f__Alcaligenaceae;g__Oligella;s__Oligella ureolytica	-0.401155133	0.04687115	0.672634289	0.76
unclassified	k__Bacteria;p__Proteobacteria;c__Gammaproteobacteria;o__Pasteurellales;f__Pasteurellaceae;g__Mannheimia;s__Mannheimia haemolytica	-0.401287077	0.046792065	0.672634289	0.44
unclassified	k__Bacteria;p__Proteobacteria;c__Deltaproteobacteria;o__Desulfovibrionales;f__Desulfovibrionaceae;g__Lawsonia;s__Lawsonia intracellularis	-0.401508837	0.046659382	0.672634289	0
unclassified	k__Bacteria;p__Proteobacteria;c__Betaproteobacteria;o__Burkholderiales;f__Alcaligenaceae;g__Oligella;s__Oligella ureolytica	-0.401823557	0.046471587	0.672634289	0.72
#N/A	k__Bacteria;p__Proteobacteria;c__Gammaproteobacteria;o__Pasteurellales;f__Pasteurellaceae;g__Mannheimia;s__Mannheimia haemolytica	-0.401905504	0.046422786	0.672634289	0.48
#N/A	k__Bacteria;p__Proteobacteria;c__Gammaproteobacteria;o__Pasteurellales;f__Pasteurellaceae;g__Haemophilus;s__Haemophilus sputorum	-0.401996788	0.046368473	0.672634289	0.64
Tricarboxylic acids and derivatives	k__Bacteria;p__Proteobacteria;c__Betaproteobacteria;o__Burkholderiales;f__Alcaligenaceae;g__Oligella;s__Oligella ureolytica	-0.402047244	0.046338473	0.672634289	0.48
unclassified	k__Bacteria;p__Proteobacteria;c__Gammaproteobacteria;o__Pasteurellales;f__Pasteurellaceae;g__Haemophilus;s__Haemophilus sputorum	-0.402511837	0.046062954	0.672634289	0.28
unclassified	k__Bacteria;p__Proteobacteria;c__Deltaproteobacteria;o__Desulfovibrionales;f__Desulfovibrionaceae;g__Lawsonia;s__Lawsonia intracellularis	-0.402789901	0.045898669	0.672634289	0
Dipeptides	k__Bacteria;p__Proteobacteria;c__Gammaproteobacteria;o__Enterobacterales;f__Yersiniaceae;g__Yersinia;s__Yersinia pestis	-0.402994052	0.045778347	0.672634289	0.36
#N/A	k__Bacteria;p__Proteobacteria;c__Gammaproteobacteria;o__Pasteurellales;f__Pasteurellaceae;g__Haemophilus;s__Haemophilus sputorum	-0.405427944	0.044362865	0.666742046	0.68
unclassified	k__Bacteria;p__Proteobacteria;c__Gammaproteobacteria;o__Pasteurellales;f__Pasteurellaceae;g__Haemophilus;s__Haemophilus sputorum	-0.405892352	0.044096734	0.666742046	0.68
Fatty acid esters	k__Bacteria;p__Proteobacteria;c__Betaproteobacteria;o__Burkholderiales;f__Alcaligenaceae;g__Oligella;s__Oligella ureolytica	-0.406385616	0.043815446	0.666742046	0.56
#N/A	k__Bacteria;p__Proteobacteria;c__Deltaproteobacteria;o__Desulfovibrionales;f__Desulfovibrionaceae;g__Lawsonia;s__Lawsonia intracellularis	-0.407662846	0.043093657	0.664812781	0.36
Gamma amino acids and derivatives	k__Bacteria;p__Proteobacteria;c__Gammaproteobacteria;o__Pasteurellales;f__Pasteurellaceae;g__Haemophilus;s__Haemophilus sputorum	-0.408421675	0.042669284	0.661086784	0.88
unclassified	k__Bacteria;p__Proteobacteria;c__Betaproteobacteria;o__Burkholderiales;f__Alcaligenaceae;g__Oligella;s__Oligella ureolytica	-0.408761481	0.042480321	0.658897313	0.64
#N/A	k__Bacteria;p__Proteobacteria;c__Betaproteobacteria;o__Burkholderiales;f__Alcaligenaceae;g__Oligella;s__Oligella ureolytica	-0.408801649	0.042458027	0.658625393	0.44
Monohydroxy bile acids, alcohols and derivatives	k__Bacteria;p__Proteobacteria;c__Betaproteobacteria;o__Neisseriales;f__Neisseriaceae;g__Neisseria;s__Neisseria mucosa	-0.409522289	0.042059634	0.654344566	0.2
#N/A	k__Bacteria;p__Proteobacteria;c__Deltaproteobacteria;o__Desulfovibrionales;f__Desulfovibrionaceae;g__Lawsonia;s__Lawsonia intracellularis	-0.409732292	0.041944094	0.65297624	0.4
unclassified	k__Bacteria;p__Proteobacteria;c__Gammaproteobacteria;o__Thiotrichales;f__Francisellaceae;g__Francisella;s__Francisella tularensis;t__Francisella tularensis subsp. holarctica	-0.410155849	0.041711823	0.65123051	0.2
unclassified	k__Bacteria;p__Proteobacteria;c__Gammaproteobacteria;o__Thiotrichales;f__Francisellaceae;g__Francisella;s__Francisella sp. W12-1067	-0.410155849	0.041711823	0.65123051	0.2
Dipeptides	k__Bacteria;p__Proteobacteria;c__Gammaproteobacteria;o__Enterobacterales;f__Yersiniaceae;g__Yersinia;s__Yersinia pestis	-0.410586054	0.041476947	0.65123051	0.56
unclassified	k__Bacteria;p__Proteobacteria;c__Deltaproteobacteria;o__Desulfovibrionales;f__Desulfovibrionaceae;g__Lawsonia;s__Lawsonia intracellularis	-0.410598359	0.041470244	0.65123051	0.72
#N/A	k__Bacteria;p__Proteobacteria;c__Deltaproteobacteria;o__Desulfovibrionales;f__Desulfovibrionaceae;g__Lawsonia;s__Lawsonia intracellularis	-0.410598359	0.041470244	0.65123051	0.72
#N/A	k__Bacteria;p__Proteobacteria;c__Deltaproteobacteria;o__Desulfovibrionales;f__Desulfovibrionaceae;g__Lawsonia;s__Lawsonia intracellularis	-0.410598359	0.041470244	0.65123051	0.72
#N/A	k__Bacteria;p__Proteobacteria;c__Deltaproteobacteria;o__Desulfovibrionales;f__Desulfovibrionaceae;g__Lawsonia;s__Lawsonia intracellularis	-0.410598359	0.041470244	0.65123051	0.72
#N/A	k__Bacteria;p__Proteobacteria;c__Deltaproteobacteria;o__Desulfovibrionales;f__Desulfovibrionaceae;g__Lawsonia;s__Lawsonia intracellularis	-0.410598359	0.041470244	0.65123051	0.72
#N/A	k__Bacteria;p__Proteobacteria;c__Deltaproteobacteria;o__Desulfovibrionales;f__Desulfovibrionaceae;g__Lawsonia;s__Lawsonia intracellularis	-0.410598359	0.041470244	0.65123051	0.72
unclassified	k__Bacteria;p__Proteobacteria;c__Deltaproteobacteria;o__Desulfovibrionales;f__Desulfovibrionaceae;g__Lawsonia;s__Lawsonia intracellularis	-0.410598359	0.041470244	0.65123051	0.72
#N/A	k__Bacteria;p__Proteobacteria;c__Deltaproteobacteria;o__Desulfovibrionales;f__Desulfovibrionaceae;g__Lawsonia;s__Lawsonia intracellularis	-0.410598359	0.041470244	0.65123051	0.72
unclassified	k__Bacteria;p__Proteobacteria;c__Deltaproteobacteria;o__Desulfovibrionales;f__Desulfovibrionaceae;g__Lawsonia;s__Lawsonia intracellularis	-0.410598359	0.041470244	0.65123051	0.72
unclassified	k__Bacteria;p__Proteobacteria;c__Deltaproteobacteria;o__Desulfovibrionales;f__Desulfovibrionaceae;g__Lawsonia;s__Lawsonia intracellularis	-0.410598359	0.041470244	0.65123051	0.72
#N/A	k__Bacteria;p__Proteobacteria;c__Deltaproteobacteria;o__Desulfovibrionales;f__Desulfovibrionaceae;g__Lawsonia;s__Lawsonia intracellularis	-0.410598359	0.041470244	0.65123051	0.72
#N/A	k__Bacteria;p__Proteobacteria;c__Deltaproteobacteria;o__Desulfovibrionales;f__Desulfovibrionaceae;g__Lawsonia;s__Lawsonia intracellularis	-0.410598359	0.041470244	0.65123051	0.72
#N/A	k__Bacteria;p__Proteobacteria;c__Deltaproteobacteria;o__Desulfovibrionales;f__Desulfovibrionaceae;g__Lawsonia;s__Lawsonia intracellularis	-0.410598359	0.041470244	0.65123051	0.72
Proline and derivatives	k__Bacteria;p__Proteobacteria;c__Betaproteobacteria;o__Burkholderiales;f__Comamonadaceae;g__Delftia;s__Delftia acidovorans	-0.410619976	0.041458472	0.65123051	0.68
unclassified	k__Bacteria;p__Proteobacteria;c__Betaproteobacteria;o__Burkholderiales;f__Comamonadaceae;g__Delftia;s__Delftia acidovorans	-0.410619976	0.041458472	0.65123051	0.68
unclassified	k__Bacteria;p__Proteobacteria;c__Betaproteobacteria;o__Burkholderiales;f__Comamonadaceae;g__Delftia;s__Delftia acidovorans	-0.410619976	0.041458472	0.65123051	0.68
unclassified	k__Bacteria;p__Proteobacteria;c__Gammaproteobacteria;o__Enterobacterales;f__Yersiniaceae;g__Yersinia;s__Yersinia pestis	-0.410619976	0.041458472	0.65123051	0.68
unclassified	k__Bacteria;p__Proteobacteria;c__Deltaproteobacteria;o__Desulfovibrionales;f__Desulfovibrionaceae;g__Lawsonia;s__Lawsonia intracellularis	-0.410713615	0.041407504	0.65123051	0.72
#N/A	k__Bacteria;p__Proteobacteria;c__Deltaproteobacteria;o__Desulfovibrionales;f__Desulfovibrionaceae;g__Lawsonia;s__Lawsonia intracellularis	-0.410713615	0.041407504	0.65123051	0.72
#N/A	k__Bacteria;p__Proteobacteria;c__Deltaproteobacteria;o__Desulfovibrionales;f__Desulfovibrionaceae;g__Lawsonia;s__Lawsonia intracellularis	-0.410713615	0.041407504	0.65123051	0.72
#N/A	k__Bacteria;p__Proteobacteria;c__Deltaproteobacteria;o__Desulfovibrionales;f__Desulfovibrionaceae;g__Lawsonia;s__Lawsonia intracellularis	-0.410713615	0.041407504	0.65123051	0.72
#N/A	k__Bacteria;p__Proteobacteria;c__Deltaproteobacteria;o__Desulfovibrionales;f__Desulfovibrionaceae;g__Lawsonia;s__Lawsonia intracellularis	-0.410713615	0.041407504	0.65123051	0.72
#N/A	k__Bacteria;p__Proteobacteria;c__Deltaproteobacteria;o__Desulfovibrionales;f__Desulfovibrionaceae;g__Lawsonia;s__Lawsonia intracellularis	-0.410713615	0.041407504	0.65123051	0.72
unclassified	k__Bacteria;p__Proteobacteria;c__Deltaproteobacteria;o__Desulfovibrionales;f__Desulfovibrionaceae;g__Lawsonia;s__Lawsonia intracellularis	-0.410713615	0.041407504	0.65123051	0.72
#N/A	k__Bacteria;p__Proteobacteria;c__Deltaproteobacteria;o__Desulfovibrionales;f__Desulfovibrionaceae;g__Lawsonia;s__Lawsonia intracellularis	-0.410713615	0.041407504	0.65123051	0.72
unclassified	k__Bacteria;p__Proteobacteria;c__Deltaproteobacteria;o__Desulfovibrionales;f__Desulfovibrionaceae;g__Lawsonia;s__Lawsonia intracellularis	-0.410713615	0.041407504	0.65123051	0.72
unclassified	k__Bacteria;p__Proteobacteria;c__Deltaproteobacteria;o__Desulfovibrionales;f__Desulfovibrionaceae;g__Lawsonia;s__Lawsonia intracellularis	-0.410713615	0.041407504	0.65123051	0.72
#N/A	k__Bacteria;p__Proteobacteria;c__Deltaproteobacteria;o__Desulfovibrionales;f__Desulfovibrionaceae;g__Lawsonia;s__Lawsonia intracellularis	-0.410713615	0.041407504	0.65123051	0.72
#N/A	k__Bacteria;p__Proteobacteria;c__Deltaproteobacteria;o__Desulfovibrionales;f__Desulfovibrionaceae;g__Lawsonia;s__Lawsonia intracellularis	-0.410713615	0.041407504	0.65123051	0.72
#N/A	k__Bacteria;p__Proteobacteria;c__Deltaproteobacteria;o__Desulfovibrionales;f__Desulfovibrionaceae;g__Lawsonia;s__Lawsonia intracellularis	-0.410713615	0.041407504	0.65123051	0.72
#N/A	k__Bacteria;p__Proteobacteria;c__Deltaproteobacteria;o__Desulfovibrionales;f__Desulfovibrionaceae;g__Lawsonia;s__Lawsonia intracellularis	-0.411768088	0.040836973	0.65123051	0.4
#N/A	k__Bacteria;p__Proteobacteria;c__Deltaproteobacteria;o__Desulfovibrionales;f__Desulfovibrionaceae;g__Lawsonia;s__Lawsonia intracellularis	-0.412059652	0.040680322	0.650165826	0.36
#N/A	k__Bacteria;p__Proteobacteria;c__Betaproteobacteria;o__Burkholderiales;f__Alcaligenaceae;g__Oligella;s__Oligella ureolytica	-0.415525855	0.038854145	0.637719379	0.64
Dipeptides	k__Bacteria;p__Proteobacteria;c__Gammaproteobacteria;o__Pasteurellales;f__Pasteurellaceae;g__Haemophilus;s__Haemophilus sputorum	-0.41569377	0.038767357	0.637719379	0.56
unclassified	k__Bacteria;p__Proteobacteria;c__Gammaproteobacteria;o__Pasteurellales;f__Pasteurellaceae;g__Mannheimia;s__Mannheimia haemolytica	-0.416251511	0.038480185	0.637719379	0.4
#N/A	k__Bacteria;p__Proteobacteria;c__Betaproteobacteria;o__Neisseriales;f__Neisseriaceae;g__Neisseria;s__Neisseria mucosa	-0.416704551	0.038248164	0.637719379	0.56
#N/A	k__Bacteria;p__Proteobacteria;c__Betaproteobacteria;o__Neisseriales;f__Neisseriaceae;g__Neisseria;s__Neisseria mucosa	-0.416704551	0.038248164	0.637719379	0.56
Steroid esters	k__Bacteria;p__Proteobacteria;c__Betaproteobacteria;o__Burkholderiales;f__Comamonadaceae;g__Ottowia;s__Ottowia thiooxydans	-0.416704551	0.038248164	0.637719379	0.56
#N/A	k__Bacteria;p__Proteobacteria;c__Gammaproteobacteria;o__Pasteurellales;f__Pasteurellaceae;g__Haemophilus;s__Haemophilus sputorum	-0.416826954	0.038185667	0.637719379	0.92
#N/A	k__Bacteria;p__Proteobacteria;c__Gammaproteobacteria;o__Pasteurellales;f__Pasteurellaceae;g__Haemophilus;s__Haemophilus sputorum	-0.416917401	0.038139539	0.637719379	0.84
#N/A	k__Bacteria;p__Proteobacteria;c__Betaproteobacteria;o__Neisseriales;f__Neisseriaceae;g__Neisseria;s__Neisseria lactamica	-0.418454406	0.037362388	0.632195639	0.36
#N/A	k__Bacteria;p__Proteobacteria;c__Betaproteobacteria;o__Neisseriales;f__Neisseriaceae;g__Kingella;s__Kingella denitrificans	-0.418454406	0.037362388	0.632195639	0.36
Tetrahydroxy bile acids, alcohols and derivatives	k__Bacteria;p__Proteobacteria;c__Betaproteobacteria;o__Neisseriales;f__Neisseriaceae;g__Neisseria;s__Neisseria elongata;t__Neisseria elongata subsp. glycolytica	-0.418454406	0.037362388	0.632195639	0.36
unclassified	k__Bacteria;p__Proteobacteria;c__Gammaproteobacteria;o__Enterobacterales;f__Yersiniaceae;g__Yersinia;s__Yersinia pestis	-0.418519586	0.037329711	0.632195639	0.24
Tetrahydroxy bile acids, alcohols and derivatives	k__Bacteria;p__Proteobacteria;c__Gammaproteobacteria;o__Chromatiales;f__Chromatiaceae;g__Rheinheimera;s__Rheinheimera perlucida	-0.418707019	0.037235871	0.632195639	0.36
#N/A	k__Bacteria;p__Proteobacteria;c__Gammaproteobacteria;o__Pasteurellales;f__Pasteurellaceae;g__Mannheimia;s__Mannheimia haemolytica	-0.419399672	0.036890713	0.628195422	0.48
Tetrahydroxy bile acids, alcohols and derivatives	k__Bacteria;p__Proteobacteria;c__Betaproteobacteria;o__Rhodocyclales;f__Rhodocyclaceae;g__;s__Rhodocyclaceae bacterium Paddy-1	-0.419467614	0.036856994	0.628015875	0.36
#N/A	k__Bacteria;p__Proteobacteria;c__Betaproteobacteria;o__Burkholderiales;f__Comamonadaceae;g__Ottowia;s__Ottowia thiooxydans	-0.420379358	0.036406865	0.622312539	0.12
unclassified	k__Bacteria;p__Proteobacteria;c__Betaproteobacteria;o__Burkholderiales;f__Alcaligenaceae;g__Oligella;s__Oligella ureolytica	-0.420456108	0.036369174	0.62175473	0.36
Xanthines	k__Bacteria;p__Proteobacteria;c__Betaproteobacteria;o__Burkholderiales;f__Alcaligenaceae;g__Oligella;s__Oligella ureolytica	-0.42241842	0.035415985	0.610401127	0.24
unclassified	k__Bacteria;p__Proteobacteria;c__Betaproteobacteria;o__Burkholderiales;f__Comamonadaceae;g__Ottowia;s__Ottowia thiooxydans	-0.423359057	0.034966176	0.605470781	0
unclassified	k__Bacteria;p__Proteobacteria;c__Betaproteobacteria;o__Burkholderiales;f__Alcaligenaceae;g__Oligella;s__Oligella ureolytica	-0.423528683	0.034885548	0.604376173	0.28
unclassified	k__Bacteria;p__Proteobacteria;c__Gammaproteobacteria;o__Pasteurellales;f__Pasteurellaceae;g__Haemophilus;s__Haemophilus sputorum	-0.425606568	0.033909828	0.59332572	0.52
Fatty aldehydes	k__Bacteria;p__Proteobacteria;c__Betaproteobacteria;o__Burkholderiales;f__Alcaligenaceae;g__Oligella;s__Oligella ureolytica	-0.42616053	0.03365341	0.589977497	0.44
#N/A	k__Bacteria;p__Proteobacteria;c__Gammaproteobacteria;o__Enterobacterales;f__Yersiniaceae;g__Yersinia;s__Yersinia pestis	-0.42744879	0.033063079	0.583242069	0.16
Dipeptides	k__Bacteria;p__Proteobacteria;c__Betaproteobacteria;o__Burkholderiales;f__Alcaligenaceae;g__Oligella;s__Oligella ureolytica	-0.428821487	0.03244318	0.576359663	0.72
Dipeptides	k__Bacteria;p__Proteobacteria;c__Betaproteobacteria;o__Burkholderiales;f__Alcaligenaceae;g__Oligella;s__Oligella ureolytica	-0.429257434	0.032248264	0.57600329	0.4
unclassified	k__Bacteria;p__Proteobacteria;c__Gammaproteobacteria;o__Pasteurellales;f__Pasteurellaceae;g__Mannheimia;s__Mannheimia haemolytica	-0.429805555	0.032004522	0.57600329	0.32
#N/A	k__Bacteria;p__Proteobacteria;c__Gammaproteobacteria;o__Thiotrichales;f__Francisellaceae;g__Francisella;s__Francisella tularensis;t__Francisella tularensis subsp. holarctica	-0.429831441	0.031993048	0.57600329	0.16
#N/A	k__Bacteria;p__Proteobacteria;c__Gammaproteobacteria;o__Thiotrichales;f__Francisellaceae;g__Francisella;s__Francisella sp. W12-1067	-0.429831441	0.031993048	0.57600329	0.16
Alkatetraenes	k__Bacteria;p__Proteobacteria;c__Gammaproteobacteria;o__Pasteurellales;f__Pasteurellaceae;g__Mannheimia;s__Mannheimia haemolytica	-0.432458949	0.030845334	0.567634605	0.6
Dipeptides	k__Bacteria;p__Proteobacteria;c__Betaproteobacteria;o__Burkholderiales;f__Alcaligenaceae;g__Oligella;s__Oligella ureolytica	-0.433955755	0.030206405	0.559599978	0.48
Dipeptides	k__Bacteria;p__Proteobacteria;c__Gammaproteobacteria;o__Pasteurellales;f__Pasteurellaceae;g__Mannheimia;s__Mannheimia haemolytica	-0.43468657	0.029898324	0.556800968	0.76
unclassified	k__Bacteria;p__Proteobacteria;c__Gammaproteobacteria;o__Enterobacterales;f__Yersiniaceae;g__Yersinia;s__Yersinia pestis	-0.434892232	0.029812081	0.555854754	0.52
#N/A	k__Bacteria;p__Proteobacteria;c__Betaproteobacteria;o__Burkholderiales;f__Alcaligenaceae;g__Oligella;s__Oligella ureolytica	-0.437623771	0.028685431	0.541348874	0.4
unclassified	k__Bacteria;p__Proteobacteria;c__Gammaproteobacteria;o__Pasteurellales;f__Pasteurellaceae;g__Mannheimia;s__Mannheimia haemolytica	-0.438360422	0.02838752	0.536830743	0.52
unclassified	k__Bacteria;p__Proteobacteria;c__Betaproteobacteria;o__Burkholderiales;f__Alcaligenaceae;g__Oligella;s__Oligella ureolytica	-0.439385404	0.027977144	0.531372177	0.32
unclassified	k__Bacteria;p__Proteobacteria;c__Betaproteobacteria;o__Burkholderiales;f__Comamonadaceae;g__Ottowia;s__Ottowia thiooxydans	-0.440441875	0.027559165	0.525580942	0.32
#N/A	k__Bacteria;p__Proteobacteria;c__Deltaproteobacteria;o__Desulfovibrionales;f__Desulfovibrionaceae;g__Lawsonia;s__Lawsonia intracellularis	-0.440899664	0.027379614	0.524088458	0.56
#N/A	k__Bacteria;p__Proteobacteria;c__Deltaproteobacteria;o__Desulfovibrionales;f__Desulfovibrionaceae;g__Lawsonia;s__Lawsonia intracellularis	-0.441023425	0.027331235	0.523471947	0.56
Fatty acid methyl esters	k__Bacteria;p__Proteobacteria;c__Betaproteobacteria;o__Burkholderiales;f__Alcaligenaceae;g__Oligella;s__Oligella ureolytica	-0.443488119	0.026382006	0.511101526	0.2
unclassified	k__Bacteria;p__Proteobacteria;c__Betaproteobacteria;o__Burkholderiales;f__Alcaligenaceae;g__Oligella;s__Oligella ureolytica	-0.444387355	0.026042369	0.511101526	0.44
unclassified	k__Bacteria;p__Proteobacteria;c__Betaproteobacteria;o__Neisseriales;f__Neisseriaceae;g__Neisseria;s__Neisseria mucosa	-0.445240388	0.025723449	0.511101526	0.52
Lineolic acids and derivatives	k__Bacteria;p__Proteobacteria;c__Betaproteobacteria;o__Burkholderiales;f__Comamonadaceae;g__Delftia;s__Delftia acidovorans	-0.445286374	0.025706346	0.511101526	0.64
#N/A	k__Bacteria;p__Proteobacteria;c__Gammaproteobacteria;o__Pasteurellales;f__Pasteurellaceae;g__Haemophilus;s__Haemophilus sputorum	-0.445419603	0.025656849	0.511101526	0.64
#N/A	k__Bacteria;p__Proteobacteria;c__Betaproteobacteria;o__Burkholderiales;f__Alcaligenaceae;g__Oligella;s__Oligella ureolytica	-0.445563511	0.02560347	0.511101526	0.8
#N/A	k__Bacteria;p__Proteobacteria;c__Betaproteobacteria;o__Burkholderiales;f__Alcaligenaceae;g__Oligella;s__Oligella ureolytica	-0.445563511	0.02560347	0.511101526	0.8
#N/A	k__Bacteria;p__Proteobacteria;c__Betaproteobacteria;o__Burkholderiales;f__Alcaligenaceae;g__Oligella;s__Oligella ureolytica	-0.445563511	0.02560347	0.511101526	0.8
unclassified	k__Bacteria;p__Proteobacteria;c__Betaproteobacteria;o__Burkholderiales;f__Alcaligenaceae;g__Oligella;s__Oligella ureolytica	-0.445563511	0.02560347	0.511101526	0.8
Imidolactams	k__Bacteria;p__Proteobacteria;c__Betaproteobacteria;o__Burkholderiales;f__Alcaligenaceae;g__Oligella;s__Oligella ureolytica	-0.445563511	0.02560347	0.511101526	0.8
unclassified	k__Bacteria;p__Proteobacteria;c__Betaproteobacteria;o__Burkholderiales;f__Alcaligenaceae;g__Oligella;s__Oligella ureolytica	-0.445563511	0.02560347	0.511101526	0.8
unclassified	k__Bacteria;p__Proteobacteria;c__Betaproteobacteria;o__Burkholderiales;f__Alcaligenaceae;g__Oligella;s__Oligella ureolytica	-0.445596899	0.025591098	0.511101526	0.72
Trihydroxy bile acids, alcohols and derivatives	k__Bacteria;p__Proteobacteria;c__Deltaproteobacteria;o__Desulfovibrionales;f__Desulfovibrionaceae;g__Lawsonia;s__Lawsonia intracellularis	-0.446181133	0.025375396	0.511101526	0.28
unclassified	k__Bacteria;p__Proteobacteria;c__Deltaproteobacteria;o__Desulfovibrionales;f__Desulfovibrionaceae;g__Lawsonia;s__Lawsonia intracellularis	-0.448682067	0.024468554	0.511101526	0.68
unclassified	k__Bacteria;p__Proteobacteria;c__Deltaproteobacteria;o__Desulfovibrionales;f__Desulfovibrionaceae;g__Lawsonia;s__Lawsonia intracellularis	-0.448682067	0.024468554	0.511101526	0.68
unclassified	k__Bacteria;p__Proteobacteria;c__Deltaproteobacteria;o__Desulfovibrionales;f__Desulfovibrionaceae;g__Lawsonia;s__Lawsonia intracellularis	-0.448682067	0.024468554	0.511101526	0.68
Trihydroxy bile acids, alcohols and derivatives	k__Bacteria;p__Proteobacteria;c__Deltaproteobacteria;o__Desulfovibrionales;f__Desulfovibrionaceae;g__Lawsonia;s__Lawsonia intracellularis	-0.448682067	0.024468554	0.511101526	0.68
#N/A	k__Bacteria;p__Proteobacteria;c__Deltaproteobacteria;o__Desulfovibrionales;f__Desulfovibrionaceae;g__Lawsonia;s__Lawsonia intracellularis	-0.448682067	0.024468554	0.511101526	0.68
unclassified	k__Bacteria;p__Proteobacteria;c__Deltaproteobacteria;o__Desulfovibrionales;f__Desulfovibrionaceae;g__Lawsonia;s__Lawsonia intracellularis	-0.448808013	0.024423588	0.511101526	0.68
unclassified	k__Bacteria;p__Proteobacteria;c__Deltaproteobacteria;o__Desulfovibrionales;f__Desulfovibrionaceae;g__Lawsonia;s__Lawsonia intracellularis	-0.448808013	0.024423588	0.511101526	0.68
unclassified	k__Bacteria;p__Proteobacteria;c__Deltaproteobacteria;o__Desulfovibrionales;f__Desulfovibrionaceae;g__Lawsonia;s__Lawsonia intracellularis	-0.448808013	0.024423588	0.511101526	0.68
Trihydroxy bile acids, alcohols and derivatives	k__Bacteria;p__Proteobacteria;c__Deltaproteobacteria;o__Desulfovibrionales;f__Desulfovibrionaceae;g__Lawsonia;s__Lawsonia intracellularis	-0.448808013	0.024423588	0.511101526	0.68
#N/A	k__Bacteria;p__Proteobacteria;c__Deltaproteobacteria;o__Desulfovibrionales;f__Desulfovibrionaceae;g__Lawsonia;s__Lawsonia intracellularis	-0.448808013	0.024423588	0.511101526	0.68
#N/A	k__Bacteria;p__Proteobacteria;c__Gammaproteobacteria;o__Pasteurellales;f__Pasteurellaceae;g__Haemophilus;s__Haemophilus sputorum	-0.448848936	0.024408992	0.511101526	0.84
Dipeptides	k__Bacteria;p__Proteobacteria;c__Betaproteobacteria;o__Burkholderiales;f__Alcaligenaceae;g__Oligella;s__Oligella ureolytica	-0.449355524	0.024228887	0.511101526	0.56
Trihydroxy bile acids, alcohols and derivatives	k__Bacteria;p__Proteobacteria;c__Deltaproteobacteria;o__Desulfovibrionales;f__Desulfovibrionaceae;g__Lawsonia;s__Lawsonia intracellularis	-0.44959495	0.02414414	0.510157521	0.28
Dipeptides	k__Bacteria;p__Proteobacteria;c__Gammaproteobacteria;o__Pasteurellales;f__Pasteurellaceae;g__Haemophilus;s__Haemophilus sputorum	-0.44976004	0.024085844	0.509259975	0.72
unclassified	k__Bacteria;p__Proteobacteria;c__Betaproteobacteria;o__Burkholderiales;f__Alcaligenaceae;g__Oligella;s__Oligella ureolytica	-0.449972991	0.024010816	0.508369621	0.28
unclassified	k__Bacteria;p__Proteobacteria;c__Gammaproteobacteria;o__Pasteurellales;f__Pasteurellaceae;g__Haemophilus;s__Haemophilus sputorum	-0.450381873	0.023867286	0.505853496	0.48
#N/A	k__Bacteria;p__Proteobacteria;c__Gammaproteobacteria;o__Thiotrichales;f__Francisellaceae;g__Francisella;s__Francisella tularensis;t__Francisella tularensis subsp. holarctica	-0.451067111	0.023628303	0.502830584	0
#N/A	k__Bacteria;p__Proteobacteria;c__Gammaproteobacteria;o__Thiotrichales;f__Francisellaceae;g__Francisella;s__Francisella sp. W12-1067	-0.451067111	0.023628303	0.502830584	0
unclassified	k__Bacteria;p__Proteobacteria;c__Gammaproteobacteria;o__Pasteurellales;f__Pasteurellaceae;g__Haemophilus;s__Haemophilus sputorum	-0.453402804	0.022828214	0.492350912	0.72
unclassified	k__Bacteria;p__Proteobacteria;c__Betaproteobacteria;o__Burkholderiales;f__Alcaligenaceae;g__Oligella;s__Oligella ureolytica	-0.453750749	0.022710927	0.492350912	0.28
unclassified	k__Bacteria;p__Proteobacteria;c__Gammaproteobacteria;o__Pasteurellales;f__Pasteurellaceae;g__Mannheimia;s__Mannheimia haemolytica	-0.454540093	0.02244666	0.492350912	0.24
unclassified	k__Bacteria;p__Proteobacteria;c__Betaproteobacteria;o__Burkholderiales;f__Comamonadaceae;g__Ottowia;s__Ottowia thiooxydans	-0.456390973	0.021836764	0.492350912	0
Fatty acid methyl esters	k__Bacteria;p__Proteobacteria;c__Gammaproteobacteria;o__Pasteurellales;f__Pasteurellaceae;g__Haemophilus;s__Haemophilus sputorum	-0.464957753	0.019186462	0.456204083	0.2
#N/A	k__Bacteria;p__Proteobacteria;c__Gammaproteobacteria;o__Thiotrichales;f__Francisellaceae;g__Francisella;s__Francisella tularensis;t__Francisella tularensis subsp. holarctica	-0.470678724	0.017567218	0.427906948	0
#N/A	k__Bacteria;p__Proteobacteria;c__Gammaproteobacteria;o__Thiotrichales;f__Francisellaceae;g__Francisella;s__Francisella sp. W12-1067	-0.470678724	0.017567218	0.427906948	0
unclassified	k__Bacteria;p__Proteobacteria;c__Gammaproteobacteria;o__Thiotrichales;f__Francisellaceae;g__Francisella;s__Francisella tularensis;t__Francisella tularensis subsp. holarctica	-0.470678724	0.017567218	0.427906948	0
unclassified	k__Bacteria;p__Proteobacteria;c__Gammaproteobacteria;o__Thiotrichales;f__Francisellaceae;g__Francisella;s__Francisella sp. W12-1067	-0.470678724	0.017567218	0.427906948	0
unclassified	k__Bacteria;p__Proteobacteria;c__Gammaproteobacteria;o__Thiotrichales;f__Francisellaceae;g__Francisella;s__Francisella tularensis;t__Francisella tularensis subsp. holarctica	-0.470678724	0.017567218	0.427906948	0
unclassified	k__Bacteria;p__Proteobacteria;c__Gammaproteobacteria;o__Thiotrichales;f__Francisellaceae;g__Francisella;s__Francisella sp. W12-1067	-0.470678724	0.017567218	0.427906948	0
Methionine and derivatives	k__Bacteria;p__Proteobacteria;c__Gammaproteobacteria;o__Enterobacterales;f__Yersiniaceae;g__Yersinia;s__Yersinia pestis	-0.471085256	0.017456544	0.426346929	0.28
#N/A	k__Bacteria;p__Proteobacteria;c__Gammaproteobacteria;o__Pasteurellales;f__Pasteurellaceae;g__Mannheimia;s__Mannheimia haemolytica	-0.472269679	0.01713734	0.42111676	0.36
#N/A	k__Bacteria;p__Proteobacteria;c__Gammaproteobacteria;o__Pasteurellales;f__Pasteurellaceae;g__Mannheimia;s__Mannheimia haemolytica	-0.472555023	0.017061157	0.419598873	0.64
#N/A	k__Bacteria;p__Proteobacteria;c__Betaproteobacteria;o__Burkholderiales;f__Alcaligenaceae;g__Oligella;s__Oligella ureolytica	-0.472897547	0.016970074	0.41780461	0.56
Tetrahydroxy bile acids, alcohols and derivatives	k__Bacteria;p__Proteobacteria;c__Betaproteobacteria;o__Burkholderiales;f__Comamonadaceae;g__Ottowia;s__Ottowia thiooxydans	-0.472939197	0.016959026	0.417588363	0.36
Dipeptides	k__Bacteria;p__Proteobacteria;c__Gammaproteobacteria;o__Pasteurellales;f__Pasteurellaceae;g__Haemophilus;s__Haemophilus sputorum	-0.473316586	0.016859186	0.41630769	0.72
unclassified	k__Bacteria;p__Proteobacteria;c__Betaproteobacteria;o__Neisseriales;f__Neisseriaceae;g__Neisseria;s__Neisseria mucosa	-0.474144679	0.016641795	0.41281675	0.48
#N/A	k__Bacteria;p__Proteobacteria;c__Betaproteobacteria;o__Neisseriales;f__Neisseriaceae;g__Neisseria;s__Neisseria mucosa	-0.474144679	0.016641795	0.41281675	0.48
Dihydroxy bile acids, alcohols and derivatives	k__Bacteria;p__Proteobacteria;c__Gammaproteobacteria;o__Pasteurellales;f__Pasteurellaceae;g__Mannheimia;s__Mannheimia haemolytica	-0.479813496	0.015214445	0.389021131	0.72
Dihydroxy bile acids, alcohols and derivatives	k__Bacteria;p__Proteobacteria;c__Gammaproteobacteria;o__Pasteurellales;f__Pasteurellaceae;g__Mannheimia;s__Mannheimia haemolytica	-0.479813496	0.015214445	0.389021131	0.72
unclassified	k__Bacteria;p__Proteobacteria;c__Gammaproteobacteria;o__Pasteurellales;f__Pasteurellaceae;g__Haemophilus;s__Haemophilus sputorum	-0.481001747	0.014928384	0.383408133	0.32
unclassified	k__Bacteria;p__Proteobacteria;c__Gammaproteobacteria;o__Pasteurellales;f__Pasteurellaceae;g__Mannheimia;s__Mannheimia haemolytica	-0.481089635	0.014907402	0.383083217	0.48
#N/A	k__Bacteria;p__Proteobacteria;c__Gammaproteobacteria;o__Pasteurellales;f__Pasteurellaceae;g__Haemophilus;s__Haemophilus sputorum	-0.481998891	0.014691752	0.379320805	0.88
unclassified	k__Bacteria;p__Proteobacteria;c__Gammaproteobacteria;o__Pasteurellales;f__Pasteurellaceae;g__Mannheimia;s__Mannheimia haemolytica	-0.482663152	0.014535834	0.375970823	0.64
unclassified	k__Bacteria;p__Proteobacteria;c__Betaproteobacteria;o__Burkholderiales;f__Alcaligenaceae;g__Oligella;s__Oligella ureolytica	-0.484392567	0.014136268	0.368270629	0.28
unclassified	k__Bacteria;p__Proteobacteria;c__Gammaproteobacteria;o__Pasteurellales;f__Pasteurellaceae;g__Mannheimia;s__Mannheimia haemolytica	-0.485413106	0.013904751	0.363807001	0.6
#N/A	k__Bacteria;p__Proteobacteria;c__Deltaproteobacteria;o__Desulfovibrionales;f__Desulfovibrionaceae;g__Lawsonia;s__Lawsonia intracellularis	-0.48656184	0.013647894	0.360842295	0.64
#N/A	k__Bacteria;p__Proteobacteria;c__Deltaproteobacteria;o__Desulfovibrionales;f__Desulfovibrionaceae;g__Lawsonia;s__Lawsonia intracellularis	-0.486698419	0.013617617	0.360842295	0.64
Alkatetraenes	k__Bacteria;p__Proteobacteria;c__Gammaproteobacteria;o__Pasteurellales;f__Pasteurellaceae;g__Haemophilus;s__Haemophilus sputorum	-0.487709857	0.013395114	0.360842295	0.6
#N/A	k__Bacteria;p__Proteobacteria;c__Gammaproteobacteria;o__Pasteurellales;f__Pasteurellaceae;g__Haemophilus;s__Haemophilus sputorum	-0.48861859	0.013197768	0.360842295	0.64
Imidazolyl carboxylic acids and derivatives	k__Bacteria;p__Proteobacteria;c__Gammaproteobacteria;o__Pasteurellales;f__Pasteurellaceae;g__Haemophilus;s__Haemophilus sputorum	-0.49042018	0.012813605	0.360842295	0.84
Fatty acid esters	k__Bacteria;p__Proteobacteria;c__Gammaproteobacteria;o__Pasteurellales;f__Pasteurellaceae;g__Haemophilus;s__Haemophilus sputorum	-0.491248326	0.012640135	0.360842295	0.04
unclassified	k__Bacteria;p__Proteobacteria;c__Gammaproteobacteria;o__Pasteurellales;f__Pasteurellaceae;g__Haemophilus;s__Haemophilus sputorum	-0.492736596	0.012333262	0.359606818	0.68
#N/A	k__Bacteria;p__Proteobacteria;c__Deltaproteobacteria;o__Desulfovibrionales;f__Desulfovibrionaceae;g__Lawsonia;s__Lawsonia intracellularis	-0.493286552	0.012221433	0.357412464	0.32
Aporphines	k__Bacteria;p__Proteobacteria;c__Gammaproteobacteria;o__Pasteurellales;f__Pasteurellaceae;g__Haemophilus;s__Haemophilus sputorum	-0.495842516	0.011712629	0.346220892	0.84
#N/A	k__Bacteria;p__Proteobacteria;c__Deltaproteobacteria;o__Desulfovibrionales;f__Desulfovibrionaceae;g__Lawsonia;s__Lawsonia intracellularis	-0.498385251	0.011223965	0.33694399	0.32
Oligopeptides	k__Bacteria;p__Proteobacteria;c__Betaproteobacteria;o__Burkholderiales;f__Alcaligenaceae;g__Oligella;s__Oligella ureolytica	-0.498673507	0.011169649	0.335718692	0.76
unclassified	k__Bacteria;p__Proteobacteria;c__Deltaproteobacteria;o__Desulfovibrionales;f__Desulfovibrionaceae;g__Lawsonia;s__Lawsonia intracellularis	-0.502794149	0.010416689	0.330015935	0.48
unclassified	k__Bacteria;p__Proteobacteria;c__Deltaproteobacteria;o__Desulfovibrionales;f__Desulfovibrionaceae;g__Lawsonia;s__Lawsonia intracellularis	-0.502935284	0.010391665	0.330015935	0.48
#N/A	k__Bacteria;p__Proteobacteria;c__Betaproteobacteria;o__Neisseriales;f__Neisseriaceae;g__Neisseria;s__Neisseria mucosa	-0.503487582	0.010294217	0.330015935	0.44
#N/A	k__Bacteria;p__Proteobacteria;c__Betaproteobacteria;o__Neisseriales;f__Neisseriaceae;g__Neisseria;s__Neisseria mucosa	-0.503487582	0.010294217	0.330015935	0.44
unclassified	k__Bacteria;p__Proteobacteria;c__Betaproteobacteria;o__Burkholderiales;f__Alcaligenaceae;g__Oligella;s__Oligella ureolytica	-0.506761888	0.00973194	0.330015935	0.68
Fatty aldehydes	k__Bacteria;p__Proteobacteria;c__Gammaproteobacteria;o__Pasteurellales;f__Pasteurellaceae;g__Haemophilus;s__Haemophilus sputorum	-0.510311039	0.009151522	0.319575556	0.16
unclassified	k__Bacteria;p__Proteobacteria;c__Gammaproteobacteria;o__Pasteurellales;f__Pasteurellaceae;g__Mannheimia;s__Mannheimia haemolytica	-0.524317028	0.007134203	0.265205091	0.68
unclassified	k__Bacteria;p__Proteobacteria;c__Deltaproteobacteria;o__Desulfovibrionales;f__Desulfovibrionaceae;g__Lawsonia;s__Lawsonia intracellularis	-0.524482578	0.007112794	0.26452479	0.6
unclassified	k__Bacteria;p__Proteobacteria;c__Deltaproteobacteria;o__Desulfovibrionales;f__Desulfovibrionaceae;g__Lawsonia;s__Lawsonia intracellularis	-0.524629801	0.007093801	0.263933756	0.6
Tetrahydroxy bile acids, alcohols and derivatives	k__Bacteria;p__Proteobacteria;c__Deltaproteobacteria;o__Desulfovibrionales;f__Desulfovibrionaceae;g__Lawsonia;s__Lawsonia intracellularis	-0.524681585	0.00708713	0.263712168	0.36
Fatty aldehydes	k__Bacteria;p__Proteobacteria;c__Betaproteobacteria;o__Burkholderiales;f__Alcaligenaceae;g__Oligella;s__Oligella ureolytica	-0.525832478	0.006940224	0.259809017	0.16
Tetrahydroxy bile acids, alcohols and derivatives	k__Bacteria;p__Proteobacteria;c__Deltaproteobacteria;o__Desulfovibrionales;f__Desulfovibrionaceae;g__Lawsonia;s__Lawsonia intracellularis	-0.528159601	0.006650956	0.251379807	0.36
#N/A	k__Bacteria;p__Proteobacteria;c__Gammaproteobacteria;o__Pasteurellales;f__Pasteurellaceae;g__Mannheimia;s__Mannheimia haemolytica	-0.53136581	0.006269017	0.240760545	0.4
unclassified	k__Bacteria;p__Proteobacteria;c__Gammaproteobacteria;o__Pasteurellales;f__Pasteurellaceae;g__Haemophilus;s__Haemophilus sputorum	-0.531544755	0.006248254	0.24017993	0.44
Hypoxanthines	k__Bacteria;p__Proteobacteria;c__Gammaproteobacteria;o__Pasteurellales;f__Pasteurellaceae;g__Haemophilus;s__Haemophilus sputorum	-0.531665151	0.006234317	0.239702498	0.12
#N/A	k__Bacteria;p__Proteobacteria;c__Betaproteobacteria;o__Neisseriales;f__Neisseriaceae;g__Neisseria;s__Neisseria mucosa	-0.533323822	0.00604495	0.238454225	0.4
unclassified	k__Bacteria;p__Proteobacteria;c__Betaproteobacteria;o__Burkholderiales;f__Comamonadaceae;g__Ottowia;s__Ottowia thiooxydans	-0.533323822	0.00604495	0.238454225	0.4
#N/A	k__Bacteria;p__Proteobacteria;c__Betaproteobacteria;o__Burkholderiales;f__Alcaligenaceae;g__Oligella;s__Oligella ureolytica	-0.542737945	0.005059231	0.218368332	0.28
#N/A	k__Bacteria;p__Proteobacteria;c__Gammaproteobacteria;o__Pasteurellales;f__Pasteurellaceae;g__Haemophilus;s__Haemophilus sputorum	-0.546776013	0.004679998	0.205216512	0.56
Fatty acid esters	k__Bacteria;p__Proteobacteria;c__Betaproteobacteria;o__Burkholderiales;f__Alcaligenaceae;g__Oligella;s__Oligella ureolytica	-0.546826201	0.00467544	0.205060987	0.04
Methyl-branched fatty acids	k__Bacteria;p__Proteobacteria;c__Betaproteobacteria;o__Burkholderiales;f__Alcaligenaceae;g__Oligella;s__Oligella ureolytica	-0.550156003	0.004381279	0.194820418	0.12
unclassified	k__Bacteria;p__Proteobacteria;c__Betaproteobacteria;o__Burkholderiales;f__Alcaligenaceae;g__Oligella;s__Oligella ureolytica	-0.550443228	0.004356655	0.193826729	0.72
unclassified	k__Bacteria;p__Proteobacteria;c__Betaproteobacteria;o__Burkholderiales;f__Alcaligenaceae;g__Oligella;s__Oligella ureolytica	-0.550443228	0.004356655	0.193826729	0.72
Dipeptides	k__Bacteria;p__Proteobacteria;c__Betaproteobacteria;o__Burkholderiales;f__Alcaligenaceae;g__Oligella;s__Oligella ureolytica	-0.555886623	0.003911609	0.190457068	0.64
Trihydroxy bile acids, alcohols and derivatives	k__Bacteria;p__Proteobacteria;c__Deltaproteobacteria;o__Desulfovibrionales;f__Desulfovibrionaceae;g__Lawsonia;s__Lawsonia intracellularis	-0.557441836	0.003791762	0.190457068	0.44
Trihydroxy bile acids, alcohols and derivatives	k__Bacteria;p__Proteobacteria;c__Deltaproteobacteria;o__Desulfovibrionales;f__Desulfovibrionaceae;g__Lawsonia;s__Lawsonia intracellularis	-0.557598311	0.003779878	0.190457068	0.44
Bile acids, alcohols and derivatives	k__Bacteria;p__Proteobacteria;c__Deltaproteobacteria;o__Desulfovibrionales;f__Desulfovibrionaceae;g__Lawsonia;s__Lawsonia intracellularis	-0.560431781	0.003570073	0.187704213	0.16
Bile acids, alcohols and derivatives	k__Bacteria;p__Proteobacteria;c__Deltaproteobacteria;o__Desulfovibrionales;f__Desulfovibrionaceae;g__Lawsonia;s__Lawsonia intracellularis	-0.563615531	0.003346191	0.179264201	0.16
#N/A	k__Bacteria;p__Proteobacteria;c__Betaproteobacteria;o__Neisseriales;f__Neisseriaceae;g__Neisseria;s__Neisseria mucosa	-0.563693917	0.003340833	0.179089884	0.36
#N/A	k__Bacteria;p__Proteobacteria;c__Gammaproteobacteria;o__Pasteurellales;f__Pasteurellaceae;g__Mannheimia;s__Mannheimia haemolytica	-0.566625466	0.003145602	0.170742202	0.56
unclassified	k__Bacteria;p__Proteobacteria;c__Gammaproteobacteria;o__Enterobacterales;f__Yersiniaceae;g__Yersinia;s__Yersinia pestis	-0.575313396	0.00262292	0.147569679	0
unclassified	k__Bacteria;p__Proteobacteria;c__Deltaproteobacteria;o__Desulfovibrionales;f__Desulfovibrionaceae;g__Lawsonia;s__Lawsonia intracellularis	-0.577273674	0.002515819	0.142632017	0.4
unclassified	k__Bacteria;p__Proteobacteria;c__Deltaproteobacteria;o__Desulfovibrionales;f__Desulfovibrionaceae;g__Lawsonia;s__Lawsonia intracellularis	-0.577435716	0.002507135	0.142183405	0.4
#N/A	k__Bacteria;p__Proteobacteria;c__Gammaproteobacteria;o__Pasteurellales;f__Pasteurellaceae;g__Haemophilus;s__Haemophilus sputorum	-0.587434803	0.002018403	0.118777434	0.56
#N/A	k__Bacteria;p__Proteobacteria;c__Deltaproteobacteria;o__Desulfovibrionales;f__Desulfovibrionaceae;g__Lawsonia;s__Lawsonia intracellularis	-0.601161967	0.001481552	0.092452028	0.52
#N/A	k__Bacteria;p__Proteobacteria;c__Deltaproteobacteria;o__Desulfovibrionales;f__Desulfovibrionaceae;g__Lawsonia;s__Lawsonia intracellularis	-0.601330714	0.001475803	0.092160907	0.52
Fatty aldehydes	k__Bacteria;p__Proteobacteria;c__Gammaproteobacteria;o__Pasteurellales;f__Pasteurellaceae;g__Haemophilus;s__Haemophilus sputorum	-0.604722626	0.001364254	0.091719112	0.44
Tetrahydroxy bile acids, alcohols and derivatives	k__Bacteria;p__Proteobacteria;c__Deltaproteobacteria;o__Desulfovibrionales;f__Desulfovibrionaceae;g__Lawsonia;s__Lawsonia intracellularis	-0.646162466	0.000484161	0.04368325	0.4
Tetrahydroxy bile acids, alcohols and derivatives	k__Bacteria;p__Proteobacteria;c__Deltaproteobacteria;o__Desulfovibrionales;f__Desulfovibrionaceae;g__Lawsonia;s__Lawsonia intracellularis	-0.646343845	0.00048181	0.043623865	0.4
